# Supplementary material for: African-specific prostate cancer molecular taxonomy
Source: Research Square preprint supplement (doi:10.21203/rs.3.rs-1122619/v1), 2021-12-01
Supplement: Supplementary file 3 [file 5949c6a5535cb4585d3fa262.xlsx]

## Sheet: SRB_183_tumours
seqnames	start	end	width	strand	gene_name	hid	p	fdr	count	effectsize	count.pred	count.density	count.pred.density	eligible	p.neg	fdr.neg	comment
1	16244193	16244403	211	-	RP1-134O19.3	518	4.4e-05	0.033	1	8.71	0.00239	0.00538	1.29e-05	186	1	1
1	16296127	16296689	563	+	RP11-5P18.1	520	5.1e-06	0.0067	2	8.57	0.00525	0.0044	1.15e-05	455	1	1
1	16361673	16366524	4852	-	RP11-5P18.10	527	7.7e-09	3e-05	4	7.99	0.0157	0.00287	1.13e-05	1392	1	1
1	151601800	151601906	107	+	RNU6-1062P	3150	0.00011	0.066	1	9.88	0.00106	0.0161	1.71e-05	62	1	1
1	161592986	161601753	8768	-	FCGR3B	3653	2.3e-05	0.022	3	5.5	0.0665	0.00229	5.07e-05	1311	1	1
1	205626979	205649587	22609	-	SLC45A3	4466	7.3e-09	3e-05	9	5.51	0.197	0.000439	9.64e-06	20479	1	1
1	248457918	248458880	963	-	OR2T12	5327	0.00014	0.078	2	7.15	0.0141	0.0328	0.000231	61	1	1
2	32047660	32048505	846	-	KRT18P52	29004	1.6e-13	9.3e-10	5	10.21	0.00422	0.0136	1.15e-05	368	1	1
2	32048087	32048175	89	-	AL121652.3	29005	1.9e-14	1.2e-10	4	12.87	0.000533	0.0769	1.02e-05	52	1	1
2	32048482	32048886	405	-	AK2P2	29006	3.3e-15	2.4e-11	5	11.02	0.00241	0.0581	2.8e-05	86	1	1
2	91924752	91955465	30714	+	AC027612.4	30064	3.3e-05	0.028	3	5.92	0.0495	0.00164	2.7e-05	1834	1	1	Clone-based Vega gene
2	131040252	131040902	651	+	AC068137.11	30742	5.1e-06	0.0067	2	9.33	0.0031	0.0256	3.98e-05	78	1	1
2	132126635	132127284	650	-	AC073869.13	30790	4.3e-05	0.033	2	7.85	0.00866	0.0364	0.000157	55	1	1
2	228189867	228222550	32684	+	MFF	32182	1.7e-07	0.00052	9	4.85	0.311	0.000316	1.09e-05	28487	1	1
2	233243244	233247599	4356	+	ALPP	32279	1.6e-05	0.016	3	6.4	0.0356	0.00189	2.24e-05	1590	1	1
2	233244345	233246384	2040	-	AC068134.8	32280	1.1e-07	0.00037	3	8.65	0.00747	0.0126	3.13e-05	239	1	1
2	233271553	233275424	3872	+	ALPPL2	32282	1.7e-05	0.017	3	6.41	0.0352	0.00217	2.54e-05	1385	1	1
3	63993758	63994368	611	-	RP11-245J9.5	36950	5.3e-05	0.038	1	7.38	0.00602	0.00172	1.03e-05	582	1	1
3	132036211	132087142	50932	+	ACPP	37823	5.6e-06	0.0072	9	4.25	0.471	0.000208	1.09e-05	43273	1	1
3	190146444	190167665	21222	-	TMEM207	38740	0.00014	0.078	4	4.41	0.188	0.000221	1.04e-05	18075	1	1
4	8271492	8308838	37347	+	HTRA3	39145	1e-05	0.012	7	4.43	0.326	0.000207	9.62e-06	33836	1	1
4	66439177	66440046	870	+	RP11-408P14.1	39840	0.00012	0.07	1	10.27	0.00081	0.0294	2.38e-05	34	1	1
4	70274554	70288882	14329	+	RP11-790I12.2	39924	9.5e-05	0.058	3	5.12	0.0865	0.00109	3.15e-05	2747	1	1
4	144833484	144903607	70124	+	RP11-673E1.1	40881	3.2e-05	0.028	8	4.01	0.497	0.000691	4.3e-05	11574	1	1
4	144874788	145047512	172725	+	RP11-673E1.4	40882	7.5e-06	0.0094	17	3.56	1.44	0.000446	3.77e-05	38083	1	1
4	144917257	145061844	144588	-	GYPB	40883	1.6e-05	0.016	14	3.58	1.17	0.000478	4e-05	29281	1	1
4	145030457	145061904	31448	-	GYPA	40884	6e-05	0.041	6	4.06	0.36	0.00072	4.32e-05	8330	1	1
4	165859474	165861142	1669	-	RP11-366M4.6	41159	0.0001	0.06	2	7.29	0.0128	0.00198	1.27e-05	1008	1	1
4	165869231	165899980	30750	+	RP11-366M4.8	41161	4.2e-05	0.033	5	4.41	0.235	0.00025	1.18e-05	19988	1	1
5	93018544	93019373	830	-	NPM1P27	42830	6.8e-05	0.045	1	10.32	0.000781	0.0278	2.17e-05	36	1	1
5	99388563	99389243	681	-	RP11-475J5.4	42939	4.3e-05	0.033	2	8.07	0.00746	0.00373	1.39e-05	536	1	1
6	31321649	31324965	3317	-	HLA-B	45118	5.9e-24	5.7e-20	10	10.34	0.00772	0.0238	1.83e-05	421	1	1
6	31324424	31325414	991	+	XXbac-BPG248L24.12	45119	1e-24	1.4e-20	11	9.92	0.0114	0.0182	1.88e-05	604	1	1	Clone-based Vega gene; alt_contig chr6 - BND
6	32595956	32614839	18884	+	HLA-DQA1	45239	2.4e-25	4.6e-21	32	6.68	0.311	0.0022	2.14e-05	14545	1	1	alt_contig chr6 - BND
6	32627244	32636160	8917	-	HLA-DQB1	45240	2.3e-48	1.3e-43	46	8.2	0.157	0.00566	1.93e-05	8130	1	1	alt_contig chr6 - BND
6	32627657	32628506	850	+	HLA-DQB1-AS1	45241	2.6e-24	3e-20	12	9.6	0.0155	0.0145	1.87e-05	829	1	1	lncRNA; alt_contig chr6 - BND
6	32627663	32630227	2565	-	XXbac-BPG254F23.6	45242	6.9e-28	2e-23	18	8.59	0.0466	0.00801	2.07e-05	2246	1	1	Clone-based Vega gene; alt_contig chr6 - BND
6	52614897	52628367	13471	-	GSTA2	45708	3.5e-05	0.029	4	5.29	0.102	0.000794	2.03e-05	5038	1	1
6	160874460	160932156	57697	-	LPAL2	47124	3.9e-06	0.0055	9	4.15	0.508	0.000216	1.22e-05	41617	1	1
7	26240782	26252976	12195	+	CBX3	47690	5.7e-07	0.0012	5	5.64	0.1	0.000587	1.18e-05	8520	1	1
7	64544481	64560610	16130	+	RP11-460N20.5	48387	1.4e-05	0.015	3	6.49	0.0333	0.00676	7.51e-05	444	1	1
7	66460160	66704501	244342	+	TYW1	48457	9.8e-06	0.012	18	3.52	1.56	0.000463	4.03e-05	38835	1	1
7	76239303	76256578	17276	-	POMZP3	48649	7.7e-05	0.05	2	6.79	0.0181	0.0076	6.9e-05	263	1	1
8	9144982	9145088	107	-	RNU6-1151P	50340	2.1e-07	0.00055	2	11.24	0.00083	0.0312	1.3e-05	64	1	1
8	11777409	11778318	910	-	OR7E158P	50410	4.6e-06	0.0063	2	9.47	0.00282	0.0099	1.39e-05	202	1	1
8	11870545	11873043	2499	-	RP11-481A20.11	50417	1.7e-05	0.017	2	7.76	0.00924	0.00709	3.28e-05	282	1	1
8	30589764	30624522	34759	+	UBXN8	50789	0.0001	0.06	4	4.21	0.217	0.000207	1.12e-05	19279	1	1
8	60368444	60368569	126	+	RNA5SP267	51241	2.4e-07	0.00058	2	11.07	0.000928	0.0238	1.1e-05	84	1	1
8	128747680	128753674	5995	+	MYC	52220	4.4e-05	0.033	3	5.96	0.0481	0.000565	9.07e-06	5308	1	1
8	143953772	143961262	7491	-	CYP11B1	52386	2.1e-07	0.00055	5	5.87	0.0857	0.00121	2.07e-05	4144	1	1
8	143991975	143999259	7285	-	CYP11B2	52387	4.8e-07	0.001	5	6.04	0.0761	0.00122	1.86e-05	4098	1	1
9	71010609	71021416	10808	-	RP11-88I18.2	53509	8.5e-05	0.054	5	4.38	0.24	0.00663	0.000318	754	1	1
10	29577990	29607257	29268	+	LYZL1	5826	0.00014	0.078	5	4.12	0.287	0.000249	1.43e-05	20069	1	1
10	89511269	89601100	89832	-	ATAD1	6823	3.3e-05	0.028	11	3.66	0.869	0.000152	1.2e-05	72423	1	1
10	89577685	89605369	27685	+	CFL1P1	6824	0.00012	0.07	5	4.22	0.268	0.000221	1.19e-05	22615	1	1
10	89622870	89731687	108818	+	PTEN	6827	2.5e-06	0.0036	17	3.82	1.21	0.000201	1.43e-05	84616	1	1
11	3502750	3602441	99692	-	RP13-726E6.2	7797	5e-05	0.036	9	3.62	0.73	0.0015	0.000122	6011	1	1
11	33424762	33425151	390	+	RP1-130L23.1	8446	3.2e-05	0.028	1	13	0.000122	0.0833	1.02e-05	12	1	1
11	47638867	47664175	25309	-	MTCH2	8671	3.6e-05	0.029	5	4.72	0.19	0.000322	1.22e-05	15544	1	1
11	57485516	57486002	487	-	AP000662.9	8927	7.7e-06	0.0095	2	8.75	0.00464	0.0116	2.68e-05	173	1	1
11	68273551	68273634	84	-	AP000807.1	9487	5.5e-09	2.4e-05	2	13.17	0.000216	0.125	1.35e-05	16	1	1
11	71292901	71314399	21499	-	KRTAP5-11	9559	2.8e-07	0.00065	5	5.99	0.0784	0.0017	2.67e-05	2933	1	1
11	71292956	71318487	25532	-	AP000867.1	9560	2.4e-06	0.0036	5	5.58	0.105	0.00154	3.23e-05	3247	1	1
12	8332805	8368747	35943	+	FAM66C	11079	1.6e-05	0.016	6	4.43	0.279	0.00268	0.000125	2237	1	1
12	8352195	8371507	19313	-	RP11-266K4.1	11080	6.8e-08	0.00025	6	5.99	0.0941	0.00456	7.15e-05	1316	1	1
12	8567376	8568401	1026	-	OR7E140P	11094	9.1e-05	0.057	2	7.44	0.0115	0.0556	0.00032	36	1	1
12	8589999	8591021	1023	-	OR7E149P	11097	8.9e-06	0.011	2	8.92	0.00413	0.0241	4.97e-05	83	1	1
12	12867992	12875305	7314	+	CDKN1B	11263	4.4e-07	0.00098	5	6.05	0.0752	0.000719	1.08e-05	6955	1	1
12	64215801	64217675	1875	+	PABPC1P4	12371	8.7e-07	0.0015	3	8.01	0.0116	0.00293	1.13e-05	1023	1	1
12	104359582	104382652	23071	+	TDG	12995	1.7e-07	0.00052	7	5.17	0.195	0.000467	1.3e-05	15001	1	1
12	104378889	104378982	94	+	AC078819.1	12996	1.2e-11	6.3e-08	3	12.85	0.000407	0.0833	1.13e-05	36	1	1
13	25141011	25171814	30804	+	RP11-556N21.1	13817	9.4e-05	0.058	3	4.64	0.121	0.000506	2.04e-05	5926	1	1
13	25670300	25673389	3090	+	PABPC3	13830	2.4e-06	0.0036	3	6.9	0.0251	0.00174	1.46e-05	1722	1	1
13	64402973	64418258	15286	-	RP11-394A14.2	14367	1.5e-05	0.016	3	6.21	0.0405	0.00124	1.67e-05	2429	1	1
13	109962483	109964121	1639	+	LINC01067	14773	3.3e-05	0.028	2	7.95	0.00808	0.00255	1.03e-05	784	1	1
14	25075686	25078905	3220	-	GZMH	15328	6.9e-07	0.0013	4	6.46	0.0455	0.00134	1.53e-05	2977	1	1
14	25100160	25103473	3314	-	GZMB	15329	8.1e-07	0.0015	4	6.4	0.0473	0.0013	1.54e-05	3071	1	1
14	38059189	38069245	10057	-	FOXA1	15515	2.3e-07	0.00058	5	5.91	0.0832	0.000552	9.18e-06	9063	1	1
14	74003818	74010498	6681	+	ACOT1	16141	1.8e-06	0.003	4	5.97	0.0636	0.00274	4.35e-05	1462	1	1
14	74034324	74042357	8034	+	ACOT2	16143	1.9e-06	0.0031	4	5.79	0.0722	0.00161	2.9e-05	2489	1	1
14	107282792	107283280	489	-	IGHV7-81	17109	2.6e-05	0.024	2	8.41	0.00589	0.00606	1.79e-05	330	1	1
15	24451931	24471001	19071	+	RP11-580I1.1	17262	4.6e-05	0.034	5	4.62	0.203	0.000678	2.76e-05	7376	1	1
15	24480225	24521976	41752	+	RP11-580I1.2	17263	6.6e-05	0.044	6	4.13	0.342	0.00069	3.94e-05	8697	1	1
15	64945087	64945188	102	+	Y_RNA	18253	8.3e-05	0.053	1	10.36	0.00076	0.0154	1.17e-05	65	1	1
15	75966663	76005189	38527	-	CSPG4	18560	1.1e-05	0.012	7	4.37	0.339	0.000372	1.8e-05	18816	1	1
15	76551327	76554031	2705	-	TYRO3P	18581	1.1e-05	0.012	3	6.68	0.0292	0.00159	1.55e-05	1881	1	1
15	78187026	78197016	9991	+	CSPG4P13	18607	2.2e-06	0.0034	4	5.87	0.0684	0.000993	1.7e-05	4027	1	1
16	29323671	29342598	18928	+	RP11-231C14.6	20090	0.00014	0.078	4	4.48	0.179	0.000915	4.11e-05	4371	1	1
16	53044307	53045198	892	-	RP11-467J12.3	20630	2.1e-07	0.00055	3	8.3	0.00949	0.00347	1.1e-05	865	1	1
17	39190142	39191107	966	-	KRTAP1-3	23035	4.6e-05	0.034	2	7.6	0.0103	0.00375	1.93e-05	533	1	1
17	39196811	39197713	903	-	KRTAP1-1	23036	6.6e-05	0.044	2	7.65	0.00993	0.00388	1.93e-05	515	1	1
18	47225	73545	26321	-	RP11-683L23.1	24440	5.8e-05	0.04	3	5.65	0.0596	0.00141	2.8e-05	2125	1	1
18	13151636	13152688	1053	-	RP11-807E13.2	24735	6.3e-07	0.0013	3	7.93	0.0123	0.00323	1.32e-05	929	1	1
19	12540521	12551926	11406	-	ZNF443	26234	4.4e-05	0.033	4	4.8	0.144	0.0013	4.7e-05	3066	1	1
19	22817126	22850472	33347	+	ZNF492	26764	0.00016	0.087	4	4.68	0.156	0.000507	1.97e-05	7887	1	1
19	43406231	43423715	17485	-	PSG6	27421	3.6e-05	0.029	4	4.71	0.153	0.0011	4.2e-05	3646	1	1
19	43857811	43867480	9670	+	CD177	27436	0.00014	0.078	3	5.48	0.0674	0.00144	3.23e-05	2087	1	1
19	43864837	43873122	8286	-	CTC-490G23.4	27437	3.1e-05	0.028	3	6	0.0467	0.00125	1.94e-05	2406	1	1
20	34287194	34288906	1713	+	ROMO1	33189	0.00018	0.097	2	6.73	0.0188	0.00119	1.12e-05	1684	1	1
21	39751949	40033704	281756	-	ERG	34326	1e-06	0.0017	34	3.59	2.82	0.000139	1.15e-05	245284	1	1
21	42836478	42903043	66566	-	TMPRSS2	34382	2.1e-22	1.7e-18	38	6.09	0.556	0.000676	9.9e-06	56178	1	1
21	46011149	46012386	1238	-	KRTAP10-6	34493	2.5e-05	0.024	1	11.36	0.000381	0.0303	1.16e-05	33	1	1
22	23241661	23241835	175	+	IGLJ2	34992	6.8e-05	0.045	1	8.98	0.00198	0.0227	4.5e-05	44	1	1
X	48104329	48105180	852	+	RP11-552E4.5	55512	8.7e-07	0.0015	2	9.53	0.0027	0.0117	1.58e-05	171	1	1
X	48138858	48141227	2370	+	RP11-344N17.11	55516	5.7e-05	0.04	2	6.91	0.0166	0.00213	1.77e-05	939	1	1
X	48305273	48307251	1979	-	AF196972.4	55531	1.4e-09	6.7e-06	4	8.68	0.00973	0.00678	1.65e-05	590	1	1
X	55101496	55105342	3847	+	PAGE2B	55762	0.00015	0.083	2	6.52	0.0217	0.00298	3.24e-05	672	1	1
