# Supplementary material for: African-specific prostate cancer molecular taxonomy
Source: Research Square preprint supplement (doi:10.21203/rs.3.rs-1122619/v1), 2021-12-01
Supplement: Supplementary file 6 [file 7073dc031157253f5b3ef7ce.xlsx]

## Sheet: Drivers_hg38
Tumor_Sample_Barcode	CDS	Noncoding	SV_Breakend	Amp	Del	Total
10651-T	2	2	12	87	185	288
10734-T	0	0	0	54	87	141
10738-1042949-T	7	1	12	42	65	127
10764-T	3	0	5	109	382	499
11099-T	0	0	2	49	50	101
11114-T	0	3	19	119	360	501
11119-T	0	0	3	31	99	133
11129-T	4	1	17	180	367	569
11141-T	0	0	2	114	413	529
11265-T	0	0	0	48	104	152
11452-1056021-T	3	0	2	31	75	111
11532-T	0	0	0	39	77	116
11590-T	3	0	4	49	121	177
11830-T	3	0	8	92	245	348
11874-T	0	0	1	52	67	120
11926-T	3	1	7	51	127	189
12103-T	0	0	10	32	88	130
12543-1081384-T	1	1	10	50	120	182
12571-T	0	0	0	42	73	115
12596-T	8	1	15	105	414	543
13019-T	1	1	17	32	61	112
13104-1095757-T	2	1	24	52	158	237
13179-1096899-T	2	1	6	102	140	251
13518-T	1	0	6	63	87	157
14261-T	6	5	19	145	329	504
14365-T	2	0	7	124	392	525
14862-T	4	1	21	73	305	404
14919-T	6	4	13	38	110	171
15126-T	1	0	5	119	382	507
15178-T	4	0	3	34	161	202
15917-1147612-T	2	1	8	48	210	269
16000-T	0	1	2	27	102	132
16004-T	3	1	13	120	382	519
16176-T	7	1	9	44	133	194
16263-T	0	0	1	70	109	180
16311-T	1	0	6	115	392	514
16599-T	3	1	36	80	130	250
16677-T	1	0	4	39	75	119
16995-T	5	3	12	63	142	225
17135-T	0	0	1	38	71	110
17212-T	2	1	8	88	328	427
17392-T	0	0	1	52	61	114
17827-T	0	2	0	30	73	105
18210-T	0	0	8	54	71	133
5060-1034766-T	2	0	7	56	102	167
5287-1079625-T	4	0	10	59	57	130
5545-1079775-T	4	1	18	60	126	209
5656-1034950-T	8	0	3	27	198	236
5684-1079906-T	3	0	4	42	215	264
5902-1035059-T	0	0	7	53	96	156
5958-1040497-T	7	3	7	49	103	169
6068-T	4	0	7	38	118	167
6359-1050886-T	2	0	8	61	77	148
BRA04-T	0	0	0	35	116	151
BRA05-T	0	1	11	58	83	153
BRA07-T	3	0	13	68	151	235
BRA08-T	0	1	16	61	85	163
BRA10-T	2	1	11	87	89	190
BRA13-T	6	0	1	61	106	174
BRA15-T	3	2	6	54	130	195
KAL0004-T	5	1	6	153	158	323
KAL0013-T	2	1	14	116	193	326
KAL0022-T	4	0	2	72	83	161
KAL0043-T	12	2	27	125	164	330
KAL0054-T	4	2	12	64	105	187
KAL0072-T	34	13	28	89	146	310
KAL0074-T	4	0	16	116	263	399
KAL0078-T	4	0	9	85	107	205
KAL0091-T	4	1	4	72	175	256
KAL0101-T	0	0	6	128	115	249
KAL0104-T	2	3	21	143	118	287
KAL0106-T	4	0	7	111	135	257
KAL0107-T	0	2	6	40	91	139
KAL053-T	4	0	2	181	243	430
KAL070-T	5	0	87	181	250	523
N0001-T	6	1	17	88	124	236
N0002-T	9	2	8	125	224	368
N0007-T	1	1	4	87	107	200
N0010-T	3	0	14	64	154	235
N0015-T	4	0	22	154	235	415
N0048-T	5	1	2	84	72	164
N0053-T	4	2	9	82	121	218
N0056-T	7	0	10	153	297	467
N0059-T	0	1	3	104	308	416
N0061-T	1	0	6	120	170	297
N0067-T	7	2	27	122	270	428
N0073-T	4	2	11	67	180	264
N0077-T	1	0	2	72	165	240
N0078-T	5	0	6	145	350	506
N0081-T	7	0	4	132	226	369
N0084-T	3	1	12	155	266	437
N0085-T	3	2	4	71	238	318
N0087-T	7	4	4	99	298	412
N0088-T	4	0	10	155	331	500
SMU019-T	1	1	1	128	326	457
SMU027-T	0	0	18	106	276	400
SMU029-T	0	0	22	87	244	353
SMU030-T	4	1	7	107	310	429
SMU032-T	5	2	10	136	286	439
SMU039-T	0	0	0	165	269	434
SMU041-T	3	1	18	150	286	458
SMU047-T	3	1	8	71	168	251
SMU050-T	4	2	9	116	281	412
SMU061-T	3	5	29	115	284	436
SMU062-T	1	0	5	50	212	268
SMU064-T	1	0	3	79	149	232
SMU068-T	10	1	30	189	279	509
SMU076-T	1	0	26	63	178	268
SMU079-T	0	0	3	95	247	345
SMU080-T	8	1	5	149	255	418
SMU083-T	3	0	27	54	258	342
SMU087-T	5	2	40	159	314	520
SMU089-T	3	2	3	79	240	327
SMU091-T	0	0	6	82	209	297
SMU094-T	3	0	4	90	228	325
SMU097-T	2	0	4	94	220	320
SMU098-T	3	0	7	88	282	380
SMU100-T	1	0	9	58	86	154
SMU101-T	4	0	0	35	155	194
SMU104-T	8	1	6	96	244	355
SMU106-T	0	2	9	102	267	380
SMU107-T	3	0	8	107	251	369
SMU109-T	8	2	12	163	237	422
SMU111-T	0	0	6	87	187	280
SMU132-T	4	0	5	72	331	412
SMU141-T	1	0	8	101	206	316
SMU142-T	2	0	18	167	248	435
SMU157-T	0	0	5	112	206	323
SMU159-T	0	0	1	166	233	400
SMU161-T	9	3	17	150	256	435
SMU167-T	1	1	8	106	347	463
SMU177-T	0	0	1	107	199	307
SMU183-T	1	0	4	68	215	288
SMU195-T	4	0	26	105	305	440
SMU196-T	0	0	7	51	309	367
SMU200-T	0	0	1	80	292	373
TSH001-T	0	0	2	90	239	331
TSH003-T	0	0	2	132	270	404
TSH005-T	0	2	13	130	334	479
TSH008-T	7	0	8	113	347	475
TSH012-T	0	0	4	111	300	415
UP2003-T	10	2	8	107	264	391
UP2004-T	4	1	21	65	205	296
UP2035-T	1	0	2	87	127	217
UP2037-T	0	0	1	99	144	244
UP2039-T	4	1	4	109	278	396
UP2041-T	0	0	2	48	156	206
UP2048-T	0	0	0	50	208	258
UP2049-T	1	0	3	64	185	253
UP2050-T	4	2	18	167	142	333
UP2063-T	0	0	1	67	221	289
UP2089-T	5	1	9	55	246	316
UP2092-T	0	0	2	45	124	171
UP2093-T	4	2	19	171	289	485
UP2099-T	3	1	10	149	273	436
UP2100-T	0	0	0	100	169	269
UP2101-T	8	2	14	114	231	369
UP2103-T	13	4	22	141	255	435
UP2109-T	0	0	2	102	146	250
UP2113-T	120	17	1	71	151	360
UP2115-T	0	0	4	54	74	132
UP2116-T	5	0	12	86	184	287
UP2117-T	0	0	3	157	109	269
UP2119-T	5	0	8	61	105	179
UP2123-T	3	0	8	90	108	209
UP2133-T	9	3	34	130	297	473
UP2142-T	3	1	8	158	257	427
UP2153-T	3	2	15	80	191	291
UP2159-T	0	0	5	50	233	288
UP2187-T	4	3	14	133	266	420
UP2197-T	2	0	8	110	136	256
UP2213-T	2	0	10	158	197	367
UP2258-T	8	0	5	132	200	345
UP2264-T	0	0	0	50	117	167
UP2267-T	2	0	3	92	152	249
UP2317-T	2	1	7	140	93	243
UP2330-T	322	88	39	161	162	772
UP2351-T	6	2	11	168	174	361
UP2360-T	2	0	13	85	135	235
UP2370-T	5	0	8	114	167	294
UP2372-T	8	1	12	98	99	218
UP2380-T	1	3	4	170	242	420
UP2396-T	7	2	13	157	255	434

## Sheet: Tumours_with_no_drivers_hg19
id	Total_ssm_1-Y	Pcawg_driver_hg19	comment
10734	57	0
11099	328	0
11114	3337	0
11119	88	0
11141	126	0
11265	109	0
11532	46	0
11874	80	0
12103	161	0
12571	232	0
16000	120	0
16263	128	0
17135	80	0
17392	73	0
17827	105	0
18210	141	0
5902-1035059	1956	0
BRA04	91	0
BRA05	3441	0
BRA08	1479	0
KAL0101	227	0
KAL0107	1029	0
N0059	828	0
SMU027	4702	0
SMU029	1627	0
SMU039	206	0
SMU079	524	0
SMU091	4146	0
SMU106	2146	0
SMU111	183	0
SMU157	177	0
SMU159	169	0
SMU167	4197	0	different from hg38
SMU177	1413	0
SMU183	459	0	different from hg38
SMU196	1796	0
SMU200	173	0
TSH001	97	0
TSH003	516	0
TSH005	2778	0
TSH012	120	0
UP2037	121	0
UP2041	75	0
UP2048	143	0
UP2063	198	0
UP2092	104	0
UP2100	133	0
UP2109	338	0
UP2115	258	0
UP2117	185	0
UP2159	620	0
UP2264	190	0
UP2380	3696	0	different from hg38
