# Supplementary material for: African-specific prostate cancer molecular taxonomy
Source: Research Square preprint supplement (doi:10.21203/rs.3.rs-1122619/v1), 2021-12-01
Supplement: Supplementary file 7 [file 71442d6197f0f6f49a1035e3.xlsx]

## Sheet: Sheet1
Sample_id	SCNA_consensus_clustering	SSM_consensus_clustering	SV_consensus_clustering	All_iclusterplus_clustering	Ethnicity
6068	3	3	1	4/A	European
10651	3	6	3	4/A	European
10734	7	9	10	4/A	European
10764	5	8	6	2/C	European
11099	7	9	10	4/A	European
11114	5	5	9	2/C	European
11119	7	9	10	4/A	European
11129	5	8	3	2/C	European
11141	5	9	1	2/C	European
11265	7	9	10	4/A	European
11532	7	9	10	4/A	European
11590	7	6	3	4/A	European
11830	3	6	6	4/A	European
11874	7	9	10	4/A	European
11926	3	7	9	4/A	European
12103	7	9	7	4/A	European
12571	7	9	10	4/A	European
12596	5	3	3	2/C	European
13019	7	5	8	4/A	European
13518	7	7	4	4/A	European
14261	5	1	9	2/C	European
14365	5	7	9	2/C	European
14862	3	6	9	2/C	European
14919	7	5	9	4/A	European
15126	5	7	9	2/C	European
15178	7	2	6	4/A	European
16000	7	7	10	4/A	European
16004	5	7	9	2/C	European
16176	3	2	1	4/A	European
16263	7	9	10	4/A	European
16311	5	7	7	2/C	European
16599	3	3	1	4/A	European
16677	7	7	6	4/A	European
16995	3	2	1	4/A	European
17135	7	9	10	4/A	European
17212	4	7	2	4/A	European
17392	7	9	10	4/A	European
17827	7	6	10	4/A	European
18210	7	9	7	4/A	European
10738-1042949	7	1	9	4/A	European
11452-1056021	7	7	10	4/A	European
12543-1081384	7	7	8	4/A	European
13104-1095757	7	3	8	4/A	European
13179-1096899	3	6	9	4/A	European
15917-1147612	3	5	8	4/A	European
5060-1034766	7	6	9	4/A	European
5287-1079625	7	4	7	4/A	European
5545-1079775	1	2	1	4/A	European
5656-103495	3	1	9	4/A	European
5684-1079906	1	6	10	4/A	European
5902-1035059	7	9	9	4/A	European
5958-1040497	7	5	1	4/A	European
6359-1050886	7	7	9	4/A	European
BRA04	7	9	10	4/A	African-European
BRA05	7	7	9	4/A	African-European
BRA07	3	3	9	4/A	European
BRA08	7	7	3	4/A	European
BRA10	3	7	9	4/A	European
BRA13	1	3	10	4/A	African-European
BRA15	7	3	2	4/A	African-European
KAL0004	2	1	6	1/D	African
KAL0013	1	2	4	4/A	African
KAL0022	7	7	7	4/A	African
KAL0043	2	1	1	1/D	African
KAL0054	7	6	4	4/A	African
KAL0072	3	1	8	4/A	African
KAL0074	7	7	4	4/A	African
KAL0078	7	2	8	4/A	African
KAL0091	3	7	6	4/A	African
KAL0101	3	9	5	4/A	African
KAL0104	3	3	9	1/D	European
KAL0106	3	8	1	4/A	African
KAL0107	7	7	8	4/A	African-European
KAL053	6	6	10	3/B	African
KAL070	6	3	1	3/B	African
N0001	3	5	4	4/A	African
N0002	3	1	8	4/A	African
N0007	7	7	8	4/A	African
N0010	3	7	3	4/A	African
N0015	1	4	1	1/D	African
N0048	7	3	10	4/A	African
N0053	3	3	2	4/A	African
N0056	4	2	8	2/C	African
N0059	4	7	10	2/C	African
N0061	7	7	8	4/A	African
N0067	7	1	1	4/A	African
N0073	7	3	4	4/A	African
N0077	7	7	6	4/A	African
N0078	4	2	8	2/C	African
N0081	1	6	10	4/A	African
N0084	1	2	2	4/A	African
N0085	3	3	6	4/A	African
N0087	4	1	7	2/C	European
N0088	5	6	8	2/C	African
SMU019	4	7	10	4/A	African
SMU027	4	9	8	4/A	African
SMU029	7	9	4	4/A	African
SMU030	4	3	2	4/A	African
SMU032	7	5	6	4/A	African
SMU039	6	9	10	3/B	African
SMU041	6	6	2	3/B	African
SMU047	7	4	4	4/A	African
SMU050	4	3	9	4/A	African
SMU061	4	5	2	4/A	African
SMU062	7	7	9	4/A	African
SMU064	7	8	6	4/A	African
SMU068	1	2	4	4/A	African
SMU076	7	7	9	4/A	African
SMU079	7	9	10	4/A	African
SMU080	1	1	8	4/A	African
SMU083	3	6	8	4/A	African
SMU087	3	3	1	4/A	African
SMU089	7	3	3	4/A	African
SMU091	7	9	8	4/A	African
SMU094	7	7	6	4/A	African
SMU097	7	7	1	4/A	African
SMU098	4	7	8	4/A	African
SMU100	7	7	9	4/A	African
SMU101	7	2	10	4/A	African
SMU104	7	2	5	4/A	African
SMU106	7	5	9	4/A	African
SMU107	7	7	4	4/A	African
SMU109	1	1	8	3/B	African
SMU111	7	9	3	4/A	African
SMU132	4	3	10	2/C	African
SMU141	6	8	1	3/B	African
SMU142	6	4	8	3/B	African
SMU157	6	9	4	3/B	African
SMU159	6	9	3	3/B	African-European
SMU161	6	1	2	3/B	African
SMU167	7	7	8	4/A	African
SMU177	6	9	5	4/A	African
SMU183	7	7	5	4/A	African
SMU195	4	4	1	4/A	African
SMU196	7	9	10	4/A	African
SMU200	7	9	10	4/A	African
TSH001	7	9	10	4/A	African
TSH003	4	7	10	2/C	African
TSH005	5	7	2	2/C	African
TSH008	5	3	7	2/C	African
TSH012	4	9	5	2/C	African
UP2003	3	2	7	4/A	African-European
UP2004	7	4	5	4/A	African
UP2035	7	7	6	4/A	African
UP2037	7	9	10	4/A	African
UP2039	3	5	5	1/D	African
UP2041	7	9	10	4/A	European
UP2048	7	9	10	4/A	African
UP2049	7	7	6	4/A	African
UP2050	1	3	8	3/B	African
UP2063	6	9	5	3/B	African
UP2089	1	6	2	4/A	African
UP2092	7	9	6	4/A	African
UP2093	6	1	1	3/B	African
UP2099	6	5	5	3/B	African
UP2100	6	9	10	4/A	African
UP2101	1	1	1	4/A	African
UP2103	1	1	9	3/B	African
UP2109	7	9	7	4/A	African
UP2113	6	1	10	4/A	African
UP2115	7	9	10	4/A	African
UP2116	1	3	4	3/B	African
UP2117	6	9	5	4/A	African
UP2119	7	7	8	4/A	African-European
UP2123	7	8	7	4/A	European
UP2133	1	1	1	2/C	African
UP2142	6	6	5	3/B	African
UP2153	3	5	7	4/A	European
UP2159	6	9	4	3/B	African
UP2187	6	5	9	3/B	African
UP2197	3	2	1	1/D	African
UP2213	6	7	8	3/B	African
UP2258	2	6	10	1/D	African-European
UP2264	7	9	10	4/A	African
UP2267	3	7	6	4/A	African
UP2317	3	7	3	1/D	African
UP2330	2	1	1	1/D	African
UP2351	2	5	6	1/D	African
UP2360	3	2	4	4/A	African
UP2370	1	6	9	4/A	African
UP2372	3	1	8	4/A	African
UP2380	6	3	9	3/B	African
UP2396	6	4	8	3/B	African
