# Supplementary material for: African-specific prostate cancer molecular taxonomy
Source: Research Square preprint supplement (doi:10.21203/rs.3.rs-1122619/v1), 2021-12-01
Supplement: Supplementary file 8 [file 73654a1e0d8e7c6e6d57e718.xlsx]

## Sheet: clinical_data
Sample_id	Full_sample_id	Country	Sampling_method	Age	PSA	ISUP_GG	Pca_rating	TREATMENT	Cause_of_death	Length_followup_(months)	Outcome	Disease_free_period_(months)	PSA_at_relapse	NovaSeq_run	Blood_mean_coverage	Tissue_mean_coverage	chrM_Blood	chrM_Tissue	TMB	msi	cellularity	ploidy	chromothripsis_positive	number_high_confidence_shatterseek	number_low_confidence_shatterseek	AFR	ASN	EUR	Genetic_ancestry	gain_bp_200	%_gain_seg_mean_>0.2	loss_bp_200	%_loss_seg_mean_-0.2	PGA_200, chr1-22 (2875001522 bp)	gain_bp_10kb	%_gain_seg_mean_>0.2	loss_bp_10kb	%_loss_seg_mean_-0.2	PGA_10kb_chr1-22_(2875001522_bp)	gain (purity-corrected cn>2)	loss (purity-corrected cn<2)	somatic_sv_bnd	chromoplexy_chains	positive_chromoplexy	somatic_SNVs	somatic_indel
6068	6068	Australia	RP	55-59	31.8	5	HRPCa	TREATMENT-NAÏVE		171.5	PSA alone	1.4	0.05	NovaSeq HRPCa	58.9994	81.2854	11449.7	26234.3	1.38083	MSS	0.54	2	TRUE	1	0	3e-06	1e-06	0.999996	European	27063999	0.00941356	102378512	0.0356099	0.0450235	29625803	0.0103046	110811596	0.0385431	0.0488478	28120193	102193701	246	1	TRUE	3615	530
10651	10651	Australia	RP	65-69	6.8	5	HRPCa	TREATMENT-NAÏVE	Prostate Cancer	118.6	PSA + boney metastasis	1.7	1.3	NovaSeq HRPCa	43.892	87.3407	5863.79	16131.8	1.22668	MSS	0.76	2	TRUE	3	0	3e-06	1e-06	0.999996	European	9570686	0.00332893	335444517	0.116676	0.120005	10453493	0.003636	326679475	0.113628	0.117264	8480907	310000777	380	1	TRUE	3160	505
10734	10734	Australia	RP	65-69	6.1	4	HRPCa	TREATMENT-NAÏVE		182.2	PSA + boney metastasis	11.6	0.21	NovaSeq HRPCa	57.4874	80.8586	5015.14	22869.6	0.0210492	MSS	0.38	2	FALSE	NA	NA	0.014824	0.083325	0.901851	European	6072549	0.00211219	9168370	0.003189	0.00530119	3879111	0.00134925	11150535	0.00387844	0.0052277	6903583	10229578	18	0	FALSE	23	30
10764	10764	Australia	RP	55-59	8.6	4	HRPCa	TREATMENT-NAÏVE		179.7	PSA + Nodal Metastasis	1.1	0.32	NovaSeq HRPCa	37.1749	80.5093	4009.47	79562.6	1.4796	MSS	0.59	2	TRUE	3	0	3e-06	1e-06	0.999996	European	254050585	0.0883654	377008486	0.131133	0.219499	107865886	0.0375185	374598935	0.130295	0.167814	263365981	322059701	238	0	FALSE	3957	451
11099	11099	Australia	RP	70-74	9.9	5	HRPCa	TREATMENT-NAÏVE		171.8	PSA + local	1.1	0.22	NovaSeq HRPCa	58.8644	98.4506	4317.57	14477.7	0.121438	MSS	0.34	2.1	FALSE	NA	NA	3e-06	1e-06	0.999996	European	6213881	0.00216135	3032035	0.00105462	0.00321597	5370946	0.00186815	4330706	0.00150633	0.00337449	7823169	3745654	44	0	FALSE	261	53
11114	11114	Australia	RP	70-74	7.8	5	HRPCa	TREATMENT-NAÏVE		174.9	PSA + boney metastasis	77.6	0.27	NovaSeq HRPCa	62.5305	102.526	9643.7	70208.9	1.10492	MSS	0.3	1.6	TRUE	2	0	3e-06	1e-06	0.999996	European	192001780	0.0667832	591035833	0.205578	0.272361	72759271	0.0253076	442156901	0.153794	0.179101	759391811	830542135	164	0	FALSE	3026	279
11119	11119	Australia	RP	65-69	8	5	HRPCa	TREATMENT-NAÏVE	Other Cancer	137	Nil relapse at last followup	NA	NA	NovaSeq HRPCa	45.2641	73.0412	4766.5	10740.6	0.0288212	MSS	0.39	2.1	FALSE	NA	NA	3e-06	1e-06	0.999996	European	5584980	0.0019426	7006019	0.00243687	0.00437948	5255886	0.00182813	9082426	0.0031591	0.00498724	7205648	7974037	34	0	FALSE	47	33
11129	11129	Australia	RP	60-64	3.7	5	HRPCa	TREATMENT-NAÏVE	Other	130.8	PSA + boney metastasis	7	0.2	NovaSeq HRPCa	49.7999	89.7972	7585.87	63066	1.49093	MSS	0.47	3.8	TRUE	8	0	3e-06	1e-06	0.999996	European	972092983	0.338119	748512981	0.260352	0.598471	937362028	0.326039	671163403	0.233448	0.559487	1091742933	781344567	690	0	FALSE	3972	506
11141	11141	Australia	RP	55-59	13	5	HRPCa	TREATMENT-NAÏVE		85.1	PSA + boney metastasis	12.2	0.24	NovaSeq HRPCa	43.1608	97.8549	5245.21	65265.4	0.0446891	MSS	0.71	1.7	FALSE	NA	NA	3e-06	1e-06	0.999996	European	663519830	0.230789	787591640	0.273945	0.504734	266075039	0.0925478	664155097	0.23101	0.323558	471732006	646977076	50	0	FALSE	55	58
11265	11265	Australia	RP	65-69	11.3	5	HRPCa	TREATMENT-NAÏVE	Non-Hodgkin's lymphoma	118.4	PSA alone	20.1	0.2	NovaSeq HRPCa	41.5574	83.071	5547.14	8933.11	0.0382124	MSS	0.38	2.1	FALSE	NA	NA	3e-06	1e-06	0.999996	European	6006546	0.00208923	10034861	0.00349038	0.00557962	5022987	0.00174712	9459229	0.00329016	0.00503729	7554914	11954426	32	0	FALSE	62	43
11532	11532	Australia	RP	65-69	7.7	5	HRPCa	TREATMENT-NAÏVE		172.1	Nil relapse at last followup	NA	NA	NovaSeq HRPCa	97.5661	99.1902	13648.6	12529.7	0.0139249	MSS	0.39	2	FALSE	NA	NA	3e-06	1e-06	0.999996	European	6136389	0.00213439	7960399	0.00276883	0.00490323	4089399	0.0014224	10568356	0.00367595	0.00509835	7829427	10391451	14	0	FALSE	28	15
11590	11590	Australia	RP	60-64	15.1	5	HRPCa	TREATMENT-NAÏVE		172.4	PSA alone	36	0.26	NovaSeq HRPCa	39.7332	75.798	5857.12	22616.8	1.12014	MSS	0.35	2.1	FALSE	NA	NA	3e-06	1e-06	0.999996	European	2570242	0.000893997	167206654	0.0581588	0.0590528	6575337	0.00228707	188118891	0.0654326	0.0677197	3420039	168029641	124	1	TRUE	3010	338
11830	11830	Australia	RP	60-64	3.5	5	HRPCa	TREATMENT-NAÏVE		157.8	Nil relapse at last followup	NA	NA	NovaSeq HRPCa	50.7764	82.4821	7828.69	56126.2	1.25712	MSS	0.69	2	TRUE	4	0	3e-06	1e-06	0.999996	European	6545183	0.00227658	227948242	0.0792863	0.0815629	9879061	0.00343619	219467595	0.0763365	0.0797727	6174979	208705716	210	0	FALSE	3212	576
11874	11874	Australia	RP	65-69	5.6	5	HRPCa	TREATMENT-NAÏVE		162.1	Nil relapse at last followup	NA	NA	NovaSeq HRPCa	51.0985	98.0153	2532.66	13085.1	0.0262306	MSS	0.43	2.1	FALSE	NA	NA	3e-06	1e-06	0.999996	European	4424828	0.00153907	6464178	0.00224841	0.00378748	5708594	0.0019856	6672871	0.002321	0.00430659	8134286	7161785	52	0	FALSE	38	34
11926	11926	Australia	RP	55-59	16	5	HRPCa	TREATMENT-NAÏVE		98.3	PSA alone	36.4	0.2	NovaSeq HRPCa	44.7424	72.1147	6547.81	9763.45	1.20984	MSS	0.39	2.1	TRUE	3	0	3e-06	1e-06	0.999996	European	37912329	0.0131869	67323769	0.023417	0.0366038	42071749	0.0146336	74279230	0.0258362	0.0404699	39055948	87003435	202	2	TRUE	3148	450
12103	12103	Australia	RP	65-69	8.5	4	HRPCa	TREATMENT-NAÏVE	Liver Cancer	107.2	PSA + boney metastasis	4.1	0.4	NovaSeq HRPCa	39.2594	137.356	2211.42	31370.6	0.0534326	MSS	0.63	2.1	FALSE	NA	NA	3e-06	1e-06	0.999996	European	8263790	0.00287436	7436900	0.00258675	0.00546111	6417238	0.00223208	10508886	0.00365526	0.00588734	8078790	6119043	122	0	FALSE	75	80
12571	12571	Australia	RP	65-69	10.35	4	HRPCa	TREATMENT-NAÏVE	Prostate Cancer	60.2	PSA + boney + dist visc mets	24.4	0.44	NovaSeq HRPCa	44.9351	92.9867	4533.88	37706	0.0877591	MSS	0.43	2.1	FALSE	NA	NA	3e-06	1e-06	0.999996	European	5835703	0.00202981	9931491	0.00345443	0.00548424	5687192	0.00197815	9953852	0.00346221	0.00544036	7681146	10523086	40	0	FALSE	151	69
12596	12596	Australia	RP	60-64	6.3	5	HRPCa	TREATMENT-NAÏVE		120	Nil relapse at last followup	NA	NA	NovaSeq HRPCa	33.0145	113.921	6568.79	133110	1.42843	MSS	0.56	4.8	TRUE	1	0	3e-06	1e-06	0.999996	European	761272424	0.26479	852564812	0.296544	0.561334	383692844	0.133458	701377030	0.243957	0.377415	802871438	783684202	286	0	FALSE	3896	417
13019	13019	Australia	RP	65-69	15.2	5	HRPCa	TREATMENT-NAÏVE		143.4	PSA + Nodal Metastasis	43.9	0.2	NovaSeq HRPCa	43.7421	89.5602	5669.15	15364.9	0.385687	MSS	0.47	2.1	TRUE	1	0	3e-06	1e-06	0.999996	European	7477939	0.00260102	8887025	0.00309114	0.00569216	4279468	0.00148851	9409977	0.00327303	0.00476154	9852296	9482480	222	0	FALSE	1067	81
13518	13518	Australia	RP	70-74	7.2	5	HRPCa	TREATMENT-NAÏVE		58.4	PSA alone	1.9	0.9	NovaSeq HRPCa	48.5536	99.16	6003.53	12760.2	0.164184	MSS	0.44	2.1	FALSE	NA	NA	3e-06	1e-06	0.999996	European	6676171	0.00232214	10201348	0.00354829	0.00587044	6677251	0.00232252	7371659	0.00256405	0.00488657	7620367	10832810	60	0	FALSE	401	71
14261	14261	Australia	RP	65-69	14	4	HRPCa	TREATMENT-NAÏVE	Prostate Cancer	37.4	PSA + boney metastasis	0.9	2	NovaSeq HRPCa	44.586	91.5709	4794.69	64887.1	1.84909	MSS	0.59	3.7	TRUE	6	0	3e-06	1e-06	0.999996	European	633965060	0.220509	622503916	0.216523	0.437032	534820212	0.186024	655490031	0.227996	0.414021	638252059	567421223	414	NA	NA	4924	640
14365	14365	Australia	RP	60-64	7.2	5	HRPCa	TREATMENT-NAÏVE		119.3	PSA + boney metastasis	1.1	1.2	NovaSeq HRPCa	47.5495	86.6583	11043.9	50278.4	1.33128	MSS	0.5	1.7	TRUE	5	1	3e-06	1e-06	0.999996	European	535378250	0.186218	736037123	0.256013	0.442231	303011884	0.105395	645662163	0.224578	0.329973	669120486	745419365	222	1	TRUE	3672	341
14862	14862	Australia	RP	60-64	12.4	5	HRPCa	TREATMENT-NAÏVE		109	Nil relapse at last followup	NA	NA	NovaSeq HRPCa	41.9185	85.9387	6351.38	66284.4	1.42325	MSS	0.61	2	TRUE	2	1	3e-06	1e-06	0.999996	European	116995750	0.0406942	420910364	0.146404	0.187098	99543969	0.034624	338135524	0.117612	0.152236	113967148	371742969	548	1	TRUE	3779	495
14919	14919	Australia	RP	65-69	17	5	HRPCa	TREATMENT-NAÏVE		126.3	RP not curative	1.2	0.03	NovaSeq HRPCa	38.5604	82.0054	4727.73	12426.4	1.17455	MSS	0.56	2.1	TRUE	1	0	3e-06	1e-06	0.999996	European	4023070	0.00139933	30388857	0.01057	0.0119694	4174470	0.00145199	37607035	0.0130807	0.0145327	4709514	25024843	204	1	TRUE	3183	358
15126	15126	Australia	RP	50-54	4.67	5	HRPCa	TREATMENT-NAÏVE		124.3	PSA alone	1.2	0.03	NovaSeq HRPCa	42.8416	73.1314	7860.79	84680.3	0.197863	MSS	0.32	1.6	FALSE	NA	NA	3e-06	1e-06	0.999996	European	253436961	0.0881519	629046518	0.218799	0.306951	104910126	0.0364905	481877795	0.16761	0.2041	740393120	779733242	84	0	FALSE	501	83
15178	15178	Australia	RP	60-64	6.7	4	HRPCa	COSUDEX for 1 month		122.5	PSA + boney + dist visc mets	4.1	0.34	NovaSeq HRPCa	39.9374	71.665	13140.8	11153.4	1.03206	MSS	0.25	2	TRUE	1	0	3e-06	1e-06	0.999996	European	7338367	0.00255247	9084694	0.00315989	0.00571237	6508089	0.00226368	6131497	0.00213269	0.00439638	143694136	562697956	180	0	FALSE	2758	360
16000	16000	Australia	RP	50-54	9.43	5	HRPCa	TREATMENT-NAÏVE		58.5	RP not curative	3.1	0.03	NovaSeq HRPCa	49.1684	87.3463	7465.66	6966.66	0.0456606	MSS	0.4	2.1	FALSE	NA	NA	3e-06	0.032819	0.967178	European	3808763	0.00132479	29291271	0.0101883	0.011513	4219888	0.00146779	13494822	0.00469385	0.00616164	5162917	41950215	44	0	FALSE	78	37
16004	16004	Australia	RP	55-59	12	5	HRPCa	TREATMENT-NAÏVE		95.2	PSA alone	1.4	0.03	NovaSeq HRPCa	40.8003	84.0673	4301.82	43811.5	1.28271	MSS	0.67	2	TRUE	2	0	3e-06	1e-06	0.999996	European	120279905	0.0418365	447253846	0.155566	0.197403	123419141	0.0429284	515884868	0.179438	0.222366	80955535	342127112	370	2	TRUE	3368	471
16176	16176	Australia	RP	60-64	8.5	5	HRPCa	TREATMENT-NAÏVE		94.3	Nil relapse at last followup	NA	NA	NovaSeq HRPCa	53.0824	92.0995	5592.5	17679.2	1.30538	MSS	0.35	2	TRUE	3	0	3e-06	1e-06	0.999996	European	4276130	0.00148735	277554700	0.0965407	0.0980281	2879393	0.00100153	303944043	0.10572	0.106721	10910420	319579266	466	0	FALSE	3534	397
16263	16263	Australia	RP	60-64	4.81	5	HRPCa	TREATMENT-NAÏVE		87.9	PSA alone	10.8	0.21	NovaSeq HRPCa	39.5951	90.0764	4393.44	17300.3	0.0463083	MSS	0.61	2.1	FALSE	NA	NA	3e-06	1e-06	0.999996	European	3922568	0.00136437	5963796	0.00207436	0.00343873	8721979	0.00303373	14086567	0.00489967	0.0079334	3881768	5494604	34	0	FALSE	80	43
16311	16311	Australia	RP	60-64	16.5	5	HRPCa	TREATMENT-NAÏVE		109.1	PSA + Nodal Metastasis	15.9	0.07	NovaSeq HRPCa	41.1728	80.6899	4155.75	47790.2	0.865933	MSS	0.61	1.9	FALSE	NA	NA	3e-06	0.099563	0.900434	European	157913343	0.0549264	514118911	0.178824	0.23375	95891095	0.0333534	492689531	0.17137	0.204724	136423157	466617461	164	0	FALSE	2369	227
16599	16599	Australia	RP	65-69	7.7	5	HRPCa	TREATMENT-NAÏVE		103.2	PSA + distant visceral	1.2	0.03	NovaSeq HRPCa	47.5484	73.0687	3383.2	8657.22	1.23219	MSS	0.66	2	TRUE	3	0	3e-06	1e-06	0.999996	European	93280995	0.0324455	193217779	0.0672061	0.0996517	94451970	0.0328528	191844800	0.0667286	0.0995814	92494391	191432999	854	0	FALSE	3220	466
16677	16677	Australia	RP	65-69	6.9	5	HRPCa	TREATMENT-NAÏVE		102.6	PSA + distant visceral	2	0.19	NovaSeq HRPCa	56.3763	115.842	6711.81	19061	0.517163	MSS	0.45	2.1	FALSE	NA	NA	3e-06	1e-06	0.999996	European	3554451	0.00123633	4756962	0.0016546	0.00289092	3419937	0.00118954	7370634	0.0025637	0.00375324	4254206	5088147	42	0	FALSE	1409	113
16995	16995	Australia	RP	50-54	8.1	4	HRPCa	TREATMENT-NAÏVE		99.4	PSA alone	11.7	0.05	NovaSeq HRPCa	41.3146	89.3113	7004.56	22387.2	1.84488	MSS	0.51	2	TRUE	1	2	3e-06	1e-06	0.999996	European	7715183	0.00268354	247297755	0.0860166	0.0887001	9281988	0.00322852	254255473	0.0884366	0.0916652	8612446	247297755	466	0	FALSE	5008	518
17135	17135	Australia	RP	60-64	7.79	5	HRPCa	TREATMENT-NAÏVE		88.2	PSA alone	24.4	unknown	NovaSeq HRPCa	43.2876	104.879	2565.96	14752.1	0.0262306	MSS	0.51	2.1	FALSE	NA	NA	3e-06	1e-06	0.999996	European	4424046	0.0015388	7224437	0.00251285	0.00405164	3621721	0.00125973	7969643	0.00277205	0.00403178	4814247	9272200	52	NA	NA	30	42
17212	17212	Australia	RP	60-64	4.95	5	HRPCa	TREATMENT-NAÏVE		96.4	PSA + local	1.3	0.02	NovaSeq HRPCa	42.2538	69.7342	4712.51	31504.1	1.0136	MSS	0.34	2	TRUE	1	0	3e-06	1e-06	0.999996	European	123687388	0.0430217	222147187	0.0772685	0.12029	97731457	0.0339935	265169053	0.0922327	0.126226	187277384	532797909	148	1	TRUE	2751	293
17392	17392	Australia	RP	50-54	3.5	5	HRPCa	TREATMENT-NAÏVE		102.8	Nil relapse at last followup	NA	NA	NovaSeq HRPCa	43.814	67.1056	10208.6	13437.9	0.0249352	MSS	0.26	2.2	FALSE	NA	NA	3e-06	1e-06	0.999996	European	3649862	0.00126952	5427997	0.001888	0.00315752	4578290	0.00159245	6694924	0.00232867	0.00392112	6286114	9669035	34	0	FALSE	33	36
17827	17827	Australia	RP	65-69	9.8	5	HRPCa	TREATMENT-NAÏVE	Prostate Cancer	80.5	PSA + Nodal Metastasis	26.4	0.02	NovaSeq HRPCa	42.534	78.5298	4339.62	11958.7	0.0346503	MSS	0.37	2.1	FALSE	NA	NA	3e-06	1e-06	0.999996	European	6229301	0.00216671	6790708	0.00236198	0.0045287	4883073	0.00169846	6875236	0.00239139	0.00408984	8086650	8124720	24	0	FALSE	53	45
18210	18210	Australia	RP	65-69	18.584	5	HRPCa	TREATMENT-NAÏVE		77.1	PSA alone	1.3	0.09	NovaSeq HRPCa	42.9423	92.5938	3514.02	10214.7	0.0472798	MSS	0.42	2.1	FALSE	NA	NA	3e-06	1e-06	0.999996	European	5233280	0.00182027	8348330	0.00290376	0.00472404	4332240	0.00150687	7716961	0.00268416	0.00419102	6370343	9772896	40	0	FALSE	72	60
10738	10738-1042949	Australia	RP	55-59	8.6	1	LRPCa	TREATMENT-NAÏVE		182	Nil relapse at last followup	NA	NA	HiSeq	40.186	80.8543	5338.92	19821.8	0.982513	MSS	0.85	2.1	FALSE	NA	NA	3e-06	1e-06	0.999996	European	16402834	0.00570533	6968233	0.00242373	0.00812906	11073505	0.00385165	4685528	0.00162975	0.0054814	9482681	5818850	96	1	TRUE	2286	650
11452	11452-1056021	Australia	RP	65-69	11	1	LRPCa	TREATMENT-NAÏVE		166.1	Nil relapse at last followup	NA	NA	HiSeq	47.025	69.6893	5399.11	15473	0.519106	MSS	0.49	2.1	FALSE	NA	NA	3e-06	1e-06	0.999996	European	3605996	0.00125426	8148413	0.00283423	0.00408849	4948993	0.00172139	7651807	0.0026615	0.00438289	3838245	8182213	86	0	FALSE	1235	315
12543	12543-1081384	Australia	RP	50-54	18.6	5	HRPCa	TREATMENT-NAÏVE		156.1	PSA alone	1.2	0.5	HiSeq(CancerRes)	44.7578	78.0618	5726.95	15242.2	1.01911	MSS	0.47	2.1	TRUE	2	0	3e-06	1e-06	0.999996	European	5246715	0.00182494	34303336	0.0119316	0.0137565	5967962	0.00207581	73606836	0.0256024	0.0276782	5861891	34626221	238	2	TRUE	2601	439
13104	13104-1095757	Australia	RP	55-59	4.7	5	HRPCa	TREATMENT-NAÏVE		150.4	PSA + boney metastasis	23.1	0.21	HiSeq(CancerRes)	48.4122	77.2572	11993.5	22811	1.52267	MSS	0.39	2.1	TRUE	3	0	3e-06	1e-06	0.999996	European	4299123	0.00149535	11978184	0.00416632	0.00566167	5288375	0.00183943	19100520	0.00664366	0.00848309	5116917	32137088	226	1	TRUE	3942	627
13179	13179-1096899	Australia	RP	55-59	8.4	5	HRPCa	TREATMENT-NAÏVE	Prostate Cancer	82.7	PSA + boney metastasis	1.3	0.6	HiSeq(CancerRes)	44.527	86.4934	5329.43	34485.2	1.35363	MSS	0.51	2	TRUE	4	0	3e-06	1e-06	0.999996	European	181296115	0.0630595	326724930	0.113643	0.176703	79794041	0.0277544	335249362	0.116608	0.144363	392118562	326741930	290	0	FALSE	3370	674
15917	15917-1147612	Australia	RP	50-54	4.38	5	HRPCa	TREATMENT-NAÏVE		54.8	RP not curative	1.1	0.4	HiSeq(CancerRes)	44.0684	86.2875	4691.69	21229.6	1.02202	MSS	0.41	2	TRUE	6	2	3e-06	1e-06	0.999996	European	5924331	0.00206064	430530437	0.14975	0.15181	5406540	0.00188054	426177070	0.148235	0.150116	6366452	460409756	450	1	TRUE	2270	799
5060	5060-1034766	Australia	RP	55-59	3.5	1	LRPCa	TREATMENT-NAÏVE		214.3	Nil relapse at last followup	NA	NA	HiSeq	45.9395	74.9972	2116.98	9554.35	1.0612	MSS	0.38	2.1	FALSE	NA	NA	3e-06	1e-06	0.999996	European	2979125	0.00103622	25087043	0.00872592	0.00976214	8388406	0.00291771	31688127	0.011022	0.0139397	3917331	25295046	104	2	TRUE	2688	508
5287	5287-1079625	Australia	RP	50-54	4.3	5	HRPCa	TREATMENT-NAÏVE	Prostate Cancer	123.5	PSA + boney + dist visc mets	21	0.3	HiSeq (Cancer Res)	41.8961	81.2112	2553.96	15667.9	1.15803	MSS	0.52	2.1	FALSE	NA	NA	3e-06	1e-06	0.999996	European	8215859	0.00285769	7044605	0.0024503	0.00530799	8839203	0.0030745	8358596	0.00290734	0.00598184	8749451	7044605	96	0	FALSE	2771	666
5545	5545-1079775	Australia	RP	55-59	5	4	HRPCa	TREATMENT-NAÏVE		185.4	PSA + boney metastasis	6.7	0.29	HiSeq (Cancer Res)	36.2887	71.1173	2372.09	30858.6	1.43653	MSS	0.78	2	TRUE	8	0	3e-06	1e-06	0.999996	European	137808512	0.0479334	329671704	0.114668	0.162602	138105242	0.0480366	325432650	0.113194	0.16123	135814397	327542435	678	0	FALSE	3440	795
5656	5656-1034950	Australia	RP	65-69	5.6	1	LRPCa	TREATMENT-NAÏVE		189.1	Nil relapse at last followup	NA	NA	HiSeq	45.9806	87.1243	5113.98	24055	2.15382	MSS	0.33	2	TRUE	1	2	3e-06	1e-06	0.999996	European	6257772	0.00217661	281365201	0.0978661	0.100043	12052771	0.00419227	311627973	0.108392	0.112585	6541409	285563879	334	1	TRUE	5409	1095
5684	5684-1079906	Australia	RP	60-64	5.7	5	HRPCa	TREATMENT-NAÏVE	Prostate Cancer	172.5	PSA + boney metastasis	43.3	0.3	HiSeq (Cancer Res)	81.4092	72.4413	7039.5	13949.1	1.40447	MSS	0.75	2.1	TRUE	1	0	3e-06	1e-06	0.999996	European	178814491	0.0621963	216159608	0.0751859	0.137382	179786888	0.0625345	216079990	0.0751582	0.137693	178082896	214265408	192	2	TRUE	3593	641
5902	5902-1035059	Australia	RP	45-49	6.7	1	LRPCa	TREATMENT-NAÏVE		199.4	Nil relapse at last followup	NA	NA	HiSeq	38.7715	74.7833	5869.49	17779.5	0.628562	MSS	0.45	2.1	FALSE	NA	NA	3e-06	1e-06	0.999996	European	6210051	0.00216002	6333790	0.00220306	0.00436307	9728359	0.00338377	8552423	0.00297475	0.00635853	6949848	7766974	58	1	TRUE	1460	398
5958	5958-1040497	Australia	RP	50-54	7.3	1	LRPCa	TREATMENT-NAÏVE		197.3	PSA + local	81.9	0.22	HiSeq	42.8054	70.5583	3367	19811	1.1535	MSS	0.52	2.1	TRUE	1	0	3e-06	1e-06	0.999996	European	3073600	0.00106908	5929285	0.00206236	0.00313144	6072231	0.00211208	8902928	0.00309667	0.00520875	3155001	5929285	212	0	FALSE	2784	679
6359	6359-1050886	Australia	RP	55-59	8.5	1	LRPCa	TREATMENT-NAÏVE		193.5	Nil relapse at lastfollowup	NA	NA	HiSeq	39.8932	79.2299	4340.54	18613.8	1.11496	MSS	0.48	2.1	TRUE	2	0	3e-06	1e-06	0.999996	European	8414953	0.00292694	68538085	0.0238393	0.0267663	15491052	0.00538819	65484883	0.0227773	0.0281655	9883732	69957295	254	2	TRUE	2676	686
BRA04	BRA04	Brazil	RP	55-59	79.4	4	HRPCa	Furosemide, Amlodipine, Hydralazine, Captopril						NovaSeq HRPCa	57.3634	97.1503	8448.53	18840	0.0294689	MSS	0.38	2	FALSE	NA	NA	0.156671	0.08275	0.760579	Admixed	8729260	0.00303626	12854264	0.00447105	0.00750731	3867704	0.00134529	10703397	0.00372292	0.00506821	34970038	15917157	30	0	FALSE	49	35
BRA05	BRA05	Brazil	RP	70-74	17.4	5	HRPCa	TREATMENT-NAÏVE						NovaSeq HRPCa	47.9641	64.706	5217.22	16459.9	1.15738	MSS	0.44	2	FALSE	NA	NA	0.559338	1e-06	0.440662	Admixed	14795752	0.00514635	43282655	0.0150548	0.0202012	2427821	0.000844459	55200045	0.0192	0.0200445	33840674	46340463	162	2	TRUE	3117	291
BRA07	BRA07	Brazil	RP	65-69	30.39	4	HRPCa	TREATMENT-NAÏVE						NovaSeq HRPCa	51.4355	105.338	6898.38	21657.2	1.38731	MSS	0.55	1.9	TRUE	3	0	3e-06	0.052348	0.947649	European	33690921	0.0117186	165349769	0.0575129	0.0692315	7141101	0.00248386	164112363	0.0570825	0.0595664	43233315	163997791	290	NA	NA	3691	489
BRA08	BRA08	Brazil	TUR	70-74	30.3	5	HRPCa	Doxazosin, Cyproterone						NovaSeq HRPCa	37.164	77.5965	5496.87	12678.3	0.367552	MSS	0.13	2.3	TRUE	3	0	3e-06	1e-06	0.999996	European	17763482	0.0061786	11532211	0.0040112	0.0101898	11563630	0.00402213	7970380	0.00277231	0.00679443	266884178	121635450	586	0	FALSE	959	111
BRA10	BRA10	Brazil	TUR	65-69	232.2	4	HRPCa	Erythropoietin, sinvastatin, Insuline NPH 15UI (DM2)						NovaSeq HRPCa	51.1652	102.022	10200.2	27875.5	1.34003	MSS	0.39	2.2	TRUE	3	0	3e-06	1e-06	0.999996	European	419106977	0.145776	166819019	0.058024	0.2038	485329930	0.16881	166916009	0.0580577	0.226868	518660082	172391401	208	1	TRUE	3670	343
BRA13	BRA13	Brazil	RP	60-64	6.5	2	IRPCa	unknown						NovaSeq HRPCa	44.1925	117.772	9497.76	35751.8	1.07869	MSS	0.49	2.2	TRUE	1	0	0.783819	1e-06	0.21618	Admixed	172804744	0.060106	90137265	0.0313521	0.091458	180551811	0.0628006	87442770	0.0304149	0.0932155	193393749	93593325	136	0	FALSE	2883	331
BRA15	BRA15	Brazil	RP	70-74	15.1	5	HRPCa	unknown						NovaSeq HRPCa	41.3748	95.656	1996.44	24777.6	1.31574	MSS	0.41	2.1	TRUE	2	0	0.305015	0.158777	0.536208	Admixed	12351143	0.00429605	234262121	0.0814824	0.0857785	6241753	0.00217104	229415935	0.0797968	0.0819678	18538318	239265191	370	0	FALSE	3555	398
KAL0004	KAL0004	South Africa	Biopsy	70-74	30.57	NA	HRPCa	TREATMENT-NAÏVE						NovaSeq HRPCa	54.4769	107.818	8162.16	85119.8	1.19301	MSS	0.37	2.8	TRUE	5	0	0.999998	1e-06	1e-06	African	611954847	0.212854	714228637	0.248427	0.461281	504035270	0.175317	680061908	0.236543	0.41186	833338638	893125025	280	NA	NA	3075	474
KAL0013	KAL0013	South Africa	Biopsy	65-69	47.15	5	HRPCa	TREATMENT-NAÏVE						NovaSeq HRPCa	41.6946	114.92	5429.22	150303	1.63342	MSS	0.47	2.2	TRUE	2	0	0.999998	1e-06	1e-06	African	122748756	0.0426952	488402943	0.169879	0.212574	109899585	0.0382259	306099939	0.106469	0.144695	168483311	514019397	388	1	TRUE	4251	641
KAL0022	KAL0022	South Africa	Biopsy	65-69	unknown	5	HRPCa	TREATMENT-NAÏVE						NovaSeq HRPCa	50.013	108.843	5246.02	53408	1.23025	MSS	0.45	2.1	FALSE	NA	NA	0.999998	1e-06	1e-06	African	6422347	0.00223386	42423301	0.0147559	0.0169898	7698029	0.00267757	7329327	0.00254933	0.0052269	9057432	72359904	96	1	TRUE	3284	365
KAL0043	KAL0043	South Africa	Biopsy	80-85	unknown	5	HRPCa	TREATMENT-NAÏVE						NovaSeq HRPCa	41.4621	100.008	5249.09	57568.7	3.02947	MSS	0.52	2.5	TRUE	5	0	0.999998	1e-06	1e-06	African	516216294	0.179553	792857397	0.275776	0.45533	455548561	0.158452	682020223	0.237224	0.395676	578366918	791305197	460	4	TRUE	7616	1431
KAL0054	KAL0054	South Africa	Biopsy	60-64	42.93	5	HRPCa	TREATMENT-NAÏVE						NovaSeq HRPCa	38.0075	104.035	4246.62	18322.1	0.685233	MSS	0.57	2.1	TRUE	4	0	0.999998	1e-06	1e-06	African	12323336	0.00428638	74598084	0.0259471	0.0302335	8875421	0.0030871	11111517	0.00386487	0.00695197	12715525	58146890	286	NA	NA	1809	237
KAL0072	KAL0072	South Africa	Biopsy	60-64	53.25	5	HRPCa	TREATMENT-NAÏVE						NovaSeq HRPCa	44.5039	96.9732	4034.33	27459.5	15.6587	MSS	0.5	2.1	TRUE	6	0	0.999998	1e-06	1e-06	African	90303540	0.0314099	306903692	0.106749	0.138159	27066968	0.00941459	162328005	0.0564619	0.0658765	144865664	315619861	742	NA	NA	27745	19434
KAL0074	KAL0074	South Africa	Biopsy	65-69	18.57	3	IRPCa	TREATMENT-NAÏVE						NovaSeq HRPCa	46.7079	89.0679	5465.91	50266.9	1.59845	MSS	0.5	2.1	TRUE	5	0	0.999999	1e-06	1e-06	African	6678799	0.00232306	91544117	0.0318414	0.0341645	7326380	0.0025483	122073147	0.0424602	0.0450085	10509786	100795172	434	0	FALSE	4360	464
KAL0078	KAL0078	South Africa	Biopsy	60-64	15.9	4	HRPCa	TREATMENT-NAÏVE						NovaSeq HRPCa	45.7826	99.3286	8198.4	41225.3	0.865609	MSS	0.47	2.1	TRUE	2	0	0.999998	1e-06	1e-06	African	17849225	0.00620842	74583036	0.0259419	0.0321503	19980587	0.00694977	18211238	0.00633434	0.0132841	27607946	128159836	202	0	FALSE	2330	275
KAL0091	KAL0091	South Africa	Biopsy	70-74	182	5	HRPCa	TREATMENT-NAÏVE						NovaSeq HRPCa	42.4473	92.28	3612.36	24472.7	1.3478	MSS	0.33	2.1	TRUE	6	0	0.999998	1e-06	1e-06	African	10860179	0.00377745	350615423	0.121953	0.125731	10223966	0.00355616	335947100	0.116851	0.120407	61718148	513768042	460	0	FALSE	3576	460
KAL0101	KAL0101	South Africa	Biopsy	70-74	32.39	5	HRPCa	TREATMENT-NAÏVE						NovaSeq HRPCa	42.5867	82.2942	4930.1	20769.7	0.0705959	MSS	0.49	2.1	FALSE	NA	NA	0.999998	1e-06	1e-06	African	42743248	0.0148672	166440175	0.0578922	0.0727594	18341635	0.0063797	73918948	0.0257109	0.0320906	82987595	179741731	86	0	FALSE	108	87
KAL0104	KAL0104	South Africa	Biopsy	70-74	16.41	5	HRPCa	TREATMENT-NAÏVE						NovaSeq HRPCa	51.184	105.51	6850.72	34860.9	1.9158	MSS	0.46	2	TRUE	7	0	3e-06	1e-06	0.999996	European	387341064	0.134727	605746529	0.210694	0.345422	69406912	0.0241415	400380449	0.139263	0.163404	558909907	648915464	512	1	TRUE	4933	801
KAL0106	KAL0106	South Africa	Biopsy	65-69	1343.55	5	HRPCa	TREATMENT-NAÏVE						NovaSeq HRPCa	45.6428	76.9277	5062.27	11504	1.0068	MSS	0.45	2.1	TRUE	1	0	0.999999	1e-06	1e-06	African	135761512	0.0472214	258104524	0.0897754	0.136997	20880569	0.0072628	102429368	0.0356276	0.0428904	231960564	296086973	204	0	FALSE	2769	268
KAL0107	KAL0107	South Africa	Biopsy	65-69	10	4	HRPCa	TREATMENT-NAÏVE						NovaSeq HRPCa	45.1056	83.4306	4009.9	28779.1	0.331282	MSS	0.46	2.1	FALSE	NA	NA	0.41031	0.000727	0.588963	Admixed	21510931	0.00748206	173942383	0.0605017	0.0679837	5998272	0.00208635	17408230	0.00605503	0.00814139	50502375	220559203	36	0	FALSE	874	99
KAL053	KAL053	South Africa	Biopsy	45-49	9.09	3	IRPCa	TREATMENT-NAÏVE						NovaSeq HRPCa	43.9772	93.8052	7436.39	86534.4	0.697215	MSS	0.43	2.8	FALSE	NA	NA	0.999998	1e-06	1e-06	African	379876729	0.132131	370706530	0.128941	0.261072	427382611	0.148655	295689303	0.102848	0.251503	546069437	476136450	118	0	FALSE	1841	246
KAL070	KAL070	South Africa	Biopsy	60-64	66.31	3	IRPCa	TREATMENT-NAÏVE						NovaSeq HRPCa	47.7365	93.8586	6389.51	46091.2	3.31444	MSS	0.61	2.4	TRUE	7	1	0.999998	1e-06	1e-06	African	569889288	0.198222	453575324	0.157765	0.355988	567541231	0.197406	452337135	0.157335	0.35474	561316278	372590313	2284	6	TRUE	7708	1111
N0001	N0001	South Africa	Biopsy	75-79	22.9	4	HRPCa	TREATMENT-NAÏVE						NovaSeq HRPCa	44.9493	91.885	3126.53	13235.7	1.71762	MSS	0.53	2.1	TRUE	5	0	0.999998	1e-06	1e-06	African	105571156	0.0367204	89368500	0.0310847	0.0678051	108758094	0.0378289	94110979	0.0327342	0.0705631	105868760	89195696	338	2	TRUE	4562	568
N0002	N0002	South Africa	Biopsy	75-79	193.46	4	HRPCa	TREATMENT-NAÏVE						NovaSeq HRPCa	46.8224	70.9589	5676.66	24876.7	1.84132	MSS	0.29	1.8	TRUE	7	2	0.999998	1e-06	1e-06	African	103112966	0.0358654	406070499	0.141242	0.177107	89936364	0.0312822	374937981	0.130413	0.161695	431088536	811003028	564	1	TRUE	4817	696
N0007	N0007	South Africa	Biopsy	75-79	unknown	5	HRPCa	TREATMENT-NAÏVE						NovaSeq HRPCa	38.4506	78.7156	3292.75	15331.5	0.798899	MSS	0.5	2.1	FALSE	NA	NA	0.999998	1e-06	1e-06	African	5624025	0.00195618	9908125	0.0034463	0.00540248	8496789	0.0029554	9412547	0.00327393	0.00622933	6596044	10281926	66	0	FALSE	2153	230
N0010	N0010	South Africa	Biopsy	unknown	unknown	5	HRPCa	TREATMENT-NAÏVE						NovaSeq HRPCa	44.2668	81.4693	5594.18	12689.1	1.38763	MSS	0.51	2.1	TRUE	5	0	0.999998	1e-06	1e-06	African	70509193	0.0245249	129829761	0.0451582	0.0696831	70524531	0.0245303	126444978	0.0439808	0.0685111	71199395	129950955	368	0	FALSE	3715	444
N0015	N0015	South Africa	Biopsy	65-69	unknown	4	HRPCa	TREATMENT-NAÏVE						NovaSeq HRPCa	51.8855	106.168	5933.25	60280.3	1.97474	MSS	0.75	2.1	TRUE	7	0	0.999998	1e-06	1e-06	African	243415048	0.0846661	392127033	0.136392	0.221058	251420023	0.0874504	394113911	0.137083	0.224533	193030660	304063398	1016	1	TRUE	5001	942
N0048	N0048	South Africa	Biopsy	70-74	83.34	5	HRPCa	TREATMENT-NAÏVE						NovaSeq HRPCa	53.5225	93.6219	6775.7	22531.6	1.42293	MSS	0.34	2.1	FALSE	NA	NA	0.999998	1e-06	1e-06	African	6008603	0.00208995	5382651	0.00187222	0.00396217	7802185	0.0027138	4163887	0.00144831	0.00416211	109880039	48770375	54	0	FALSE	3903	374
N0053	N0053	South Africa	Biopsy	70-74	31.5	4	HRPCa	TREATMENT-NAÏVE						NovaSeq HRPCa	34.3112	81.2809	5523.28	38197.8	1.84456	MSS	0.32	2.3	TRUE	4	1	0.999998	1e-06	1e-06	African	375882789	0.130742	272738253	0.0948654	0.225607	254256413	0.088437	269503153	0.0937402	0.182177	582905816	317830512	242	3	TRUE	5001	526
N0056	N0056	South Africa	Biopsy	70-74	153	5	HRPCa	TREATMENT-NAÏVE						NovaSeq HRPCa	41.5026	88.5806	5581.44	88435.9	1.06315	MSS	0.53	2	TRUE	5	0	0.999998	1e-06	1e-06	African	94877088	0.0330007	322585147	0.112203	0.145204	77756152	0.0270456	259267529	0.09018	0.117226	172310871	313748141	276	0	FALSE	2808	374
N0059	N0059	South Africa	Biopsy	75-79	153	5	HRPCa	TREATMENT-NAÏVE						NovaSeq HRPCa	37.9034	75.2009	3629.52	51510.1	0.267811	MSS	0.56	2	FALSE	NA	NA	0.999998	1e-06	1e-06	African	15266222	0.00530999	315136618	0.109613	0.114923	11385703	0.00396024	239325164	0.0832435	0.0872037	21736616	265586284	54	0	FALSE	687	98
N0061	N0061	South Africa	Biopsy	70-74	>100	4	HRPCa	TREATMENT-NAÏVE						NovaSeq HRPCa	30.2297	64.7188	3735.31	27272.2	0.239313	MSS	0.73	2.1	FALSE	NA	NA	0.999998	1e-06	1e-06	African	6520484	0.00226799	18864554	0.00656158	0.00882957	6116722	0.00212755	25920391	0.00901578	0.0111433	5425753	12177579	68	0	FALSE	611	99
N0067	N0067	South Africa	Biopsy	65-69	1580	4	HRPCa	TREATMENT-NAÏVE						NovaSeq HRPCa	34.8604	79.5155	4460.57	40714.3	2.05246	MSS	0.39	2.2	TRUE	6	1	0.999998	1e-06	1e-06	African	151587826	0.0527262	104388446	0.036309	0.0890352	162512267	0.056526	108757642	0.0378287	0.0943547	189935303	153084795	464	1	TRUE	5520	676
N0073	N0073	South Africa	Biopsy	60-64	>1530	unknown		TREATMENT-NAÏVE						NovaSeq HRPCa	39.0017	96.1395	4075.12	150344	1.41418	MSS	0.52	2.1	FALSE	NA	NA	0.999998	1e-06	1e-06	African	5440413	0.00189232	67170399	0.0233636	0.0252559	5463122	0.00190022	69464658	0.0241616	0.0260618	6206383	67140203	154	2	TRUE	3761	467
N0077	N0077	South Africa	Biopsy	70-74	49.3	4	HRPCa	TREATMENT-NAÏVE						NovaSeq HRPCa	46.7771	81.6689	7955.17	29424.1	0.19592	MSS	0.46	2	FALSE	NA	NA	0.999998	1e-06	1e-06	African	6304905	0.00219301	14201808	0.00493976	0.00713277	6470424	0.00225058	18663855	0.00649177	0.00874235	7390492	16171097	34	0	FALSE	502	78
N0078	N0078	South Africa	Biopsy	65-69	>1500	5	HRPCa	TREATMENT-NAÏVE						NovaSeq HRPCa	44.0598	89.3175	6394.92	64100.2	1.19203	MSS	0.56	2	TRUE	6	0	0.999998	1e-06	1e-06	African	83469831	0.029033	353833416	0.123072	0.152105	68770193	0.0239201	362478226	0.126079	0.149999	101870406	326498301	442	0	FALSE	3207	361
N0081	N0081	South Africa	Biopsy	60-64	1232.8	5	HRPCa	TREATMENT-NAÏVE						NovaSeq HRPCa	32.0943	28.4878	4377.99	32570.3	1.13472	MSS	0.51	2	TRUE	1	0	0.999999	1e-06	1e-06	African	239387664	0.0832652	408138645	0.141961	0.225226	210784859	0.0733164	434197914	0.151025	0.224342	252277651	408945443	334	0	FALSE	3141	246
N0084	N0084	South Africa	Biopsy	65-69	591	4	HRPCa	TREATMENT-NAÏVE						NovaSeq HRPCa	43.3676	107.09	9854.11	37238	2.65285	MSS	0.57	4.1	TRUE	6	0	0.999998	1e-06	1e-06	African	381741499	0.13278	602638417	0.209613	0.342393	405733181	0.141125	590401040	0.205357	0.346481	385938698	558911579	730	1	TRUE	6613	1352
N0085	N0085	South Africa	Biopsy	70-74	137	4	HRPCa	TREATMENT-NAÏVE						NovaSeq HRPCa	52.6944	90.0794	6616.32	78383.2	1.00842	MSS	0.55	2	TRUE	2	0	0.999998	1e-06	1e-06	African	7104930	0.00247128	266736717	0.0927779	0.0952492	5385600	0.00187325	231756698	0.080611	0.0824842	10996530	250109551	162	0	FALSE	2621	360
N0087	N0087	South Africa	Biopsy	60-64	12	4	HRPCa	TREATMENT-NAÏVE						NovaSeq HRPCa	54.32	83.5262	7106.34	74220.5	1.09942	MSS	0.27	1.9	FALSE	NA	NA	3e-06	1e-06	0.999996	European	143859161	0.0500379	333170646	0.115885	0.165923	85918566	0.0298847	329303516	0.11454	0.144425	544317017	633018146	96	2	TRUE	2926	328
N0088	N0088	South Africa	Biopsy	75-79	195.5	5	HRPCa	TREATMENT-NAÏVE						NovaSeq HRPCa	54.0639	89.2695	3980.25	80264.9	2.05926	MSS	0.28	1.9	TRUE	6	0	0.999998	1e-06	1e-06	African	288532881	0.100359	454888807	0.158222	0.258581	239395095	0.0832678	373826367	0.130026	0.213294	760405912	687815787	380	0	FALSE	5592	616
SMU019	SMU019	South Africa	Biopsy	65-69	12.87	2	IRPCa	TREATMENT-NAÏVE						NovaSeq HRPCa	43.0891	81.6096	7870.14	124360	0.632448	MSS	0.48	2	FALSE	NA	NA	0.999998	1e-06	1e-06	African	10729426	0.00373197	159583288	0.0555072	0.0592392	10948339	0.00380812	133116567	0.0463014	0.0501095	12631405	178653304	88	0	FALSE	1717	167
SMU027	SMU027	South Africa	Biopsy	65-69	88.06	5	HRPCa	TREATMENT-NAÏVE						NovaSeq HRPCa	38.0898	87.0031	5470.12	74601.4	1.54437	MSS	0.39	1.9	TRUE	4	1	0.999998	1e-06	1e-06	African	9263775	0.00322218	285707097	0.0993763	0.102599	11089773	0.00385731	336204524	0.116941	0.120798	20027330	388012361	776	0	FALSE	4041	616
SMU029	SMU029	South Africa	Biopsy	60-64	19.95	1	LRPCa	TREATMENT-NAÏVE						NovaSeq HRPCa	41.9642	92.5547	6834.07	64800.8	0.534974	MSS	0.4	2.1	TRUE	4	0	0.999998	1e-06	1e-06	African	17923319	0.00623419	30702040	0.010679	0.0169132	15018589	0.00522385	15751142	0.00547865	0.0107025	87759619	88869072	350	0	FALSE	1414	182
SMU030	SMU030	South Africa	Biopsy	65-69	193.66	1	LRPCa	TREATMENT-NAÏVE						NovaSeq HRPCa	38.2531	89.5203	8296.14	54888.2	1.87727	MSS	0.51	2	TRUE	2	0	0.999998	1e-06	1e-06	African	9885459	0.00343842	192797887	0.0670601	0.0704985	9980649	0.00347153	199040129	0.0692313	0.0727028	12010059	194504891	282	2	TRUE	4887	759
SMU032	SMU032	South Africa	Biopsy	65-69	50	unknown	IRPCa	TREATMENT-NAÏVE						NovaSeq HRPCa	50.4843	79.1822	7927.09	70387.5	1.21405	MSS	0.42	2	FALSE	NA	NA	0.999998	1e-06	1e-06	African	7185752	0.00249939	69948591	0.0243299	0.0268293	8359023	0.00290749	60209518	0.0209424	0.0238499	13707911	128676869	86	0	FALSE	3255	374
SMU039	SMU039	South Africa	Biopsy	60-64	27.41	2	IRPCa	TREATMENT-NAÏVE						NovaSeq HRPCa	51.0075	82.1623	5687.64	30750.4	0.0670337	MSS	0.34	3.3	FALSE	NA	NA	0.999998	1e-06	1e-06	African	310087415	0.107856	475273860	0.165313	0.273169	429861559	0.149517	311731910	0.108428	0.257945	538926470	683658298	56	0	FALSE	154	47
SMU041	SMU041	South Africa	Biopsy	60-64	78	1 and 2	IRPCa	TREATMENT-NAÏVE						NovaSeq HRPCa	46.0981	101.441	8126.35	59636.6	1.4294	MSS	0.45	2	TRUE	1	0	0.999998	1e-06	1e-06	African	36626676	0.0127397	161786916	0.0562737	0.0690134	55144150	0.0191806	153563180	0.0534133	0.0725938	79408212	193890656	296	1	TRUE	3836	443
SMU047	SMU047	South Africa	Biopsy	60-64	32.71	unknown		TREATMENT-NAÏVE						NovaSeq HRPCa	42.8506	114.659	5297.53	56180.9	1.32286	MSS	0.5	2.1	TRUE	1	1	0.999998	1e-06	1e-06	African	9004234	0.00313191	15599489	0.00542591	0.00855781	6042798	0.00210184	30373060	0.0105645	0.0126664	19297459	17475475	196	0	FALSE	3535	442
SMU050	SMU050	South Africa	Biopsy	60-64	831.95	4	HRPCa	TREATMENT-NAÏVE						NovaSeq HRPCa	57.5335	100.161	6661.68	73946.5	1.53076	MSS	0.57	2	TRUE	3	0	0.999998	1e-06	1e-06	African	9578213	0.00333155	150017562	0.05218	0.0555115	10935047	0.00380349	153740245	0.0534748	0.0572783	9680014	134935752	180	0	FALSE	3981	605
SMU061	SMU061	South Africa	Biopsy	65-69	12.09	3	IRPCa	TREATMENT-NAÏVE						NovaSeq HRPCa	51.8986	105.081	8803.8	94886.6	2.21308	MSS	0.51	2	TRUE	3	0	0.999998	1e-06	1e-06	African	52947223	0.0184164	345784537	0.120273	0.138689	62127102	0.0216094	288252075	0.100262	0.121871	66376205	348667335	286	2	TRUE	5917	763
SMU062	SMU062	South Africa	Biopsy	60-64	unknown	2	IRPCa	TREATMENT-NAÏVE						NovaSeq HRPCa	36.6586	110.016	7768.09	78245.7	1.31088	MSS	0.55	2.1	TRUE	5	0	0.999998	1e-06	1e-06	African	20827952	0.0072445	35252708	0.0122618	0.0195063	19747849	0.00686881	24990526	0.00869235	0.0155612	21601342	29715746	218	0	FALSE	3541	394
SMU064	SMU064	South Africa	Biopsy	70-74	13.68	3	IRPCa	TREATMENT-NAÏVE						NovaSeq HRPCa	39.0753	76.5817	4471.48	46633.3	0.189119	MSS	0.49	2.1	FALSE	NA	NA	0.999998	1e-06	1e-06	African	5733920	0.00199441	11019662	0.00383292	0.00582733	7438295	0.00258723	4628145	0.00160979	0.00419702	6617717	13158660	72	0	FALSE	466	99
SMU068	SMU068	South Africa	Biopsy	70-74	64	4	HRPCa	TREATMENT-NAÏVE						NovaSeq HRPCa	42.2604	94.0204	7823.72	61756.8	1.50972	MSS	0.42	2.6	TRUE	4	0	0.999998	1e-06	1e-06	African	289166324	0.10058	624162644	0.2171	0.317679	277502142	0.0965224	574521284	0.199833	0.296356	447813823	846249189	498	0	FALSE	3828	704
SMU076	SMU076	South Africa	Biopsy	60-64	23.97	2	IRPCa	TREATMENT-NAÏVE						NovaSeq HRPCa	48.5383	93.0968	3548.08	43554.5	1.2649	MSS	0.39	2	TRUE	3	0	0.999998	1e-06	1e-06	African	9939121	0.00345708	93469848	0.0325112	0.0359683	11244890	0.00391126	105913003	0.0368393	0.0407506	12721963	102198981	312	0	FALSE	3371	440
SMU079	SMU079	South Africa	Biopsy	65-69	21.58	1 and 2	IRPCa	TREATMENT-NAÏVE						NovaSeq HRPCa	47.5224	79.0084	6002.24	52949.1	0.171632	MSS	0.51	2	FALSE	NA	NA	0.999998	1e-06	1e-06	African	41105804	0.0142977	99545513	0.0346245	0.0489222	25663527	0.00892644	65848513	0.0229038	0.0318303	66134349	102782965	72	0	FALSE	427	79
SMU080	SMU080	South Africa	Biopsy	60-64	23.31	4	HRPCa	TREATMENT-NAÏVE						NovaSeq HRPCa	36.6293	81.2205	4590.31	36517.9	1.34715	MSS	0.51	2.2	TRUE	3	0	0.999998	1e-06	1e-06	African	309525640	0.107661	279061232	0.0970647	0.204726	286713114	0.0997262	271786269	0.0945343	0.194261	321316851	281203835	318	0	FALSE	3456	578
SMU083	SMU083	South Africa	Biopsy	85-89	40.5	3	IRPCa	TREATMENT-NAÏVE						NovaSeq HRPCa	40.4742	70.2412	3383.09	42562.4	1.57092	MSS	0.41	2	TRUE	5	1	0.999998	1e-06	1e-06	African	108351567	0.0376875	342550298	0.119148	0.156835	107054819	0.0372364	406030158	0.141228	0.178464	125156552	475509625	470	1	TRUE	3985	687
SMU087	SMU087	South Africa	Biopsy	55-59	94	4	HRPCa	TREATMENT-NAÏVE						NovaSeq HRPCa	54.1415	94.7405	6170.59	50496.4	4.29987	MSS	0.32	2.3	TRUE	9	0	0.999999	1e-06	1e-06	African	347194787	0.120763	302573841	0.105243	0.226006	435011468	0.151308	266630414	0.092741	0.244049	483668973	549879519	1602	1	TRUE	11713	1224
SMU089	SMU089	South Africa	Biopsy	50-54	18.38	3	IRPCa	TREATMENT-NAÏVE						NovaSeq HRPCa	48.8314	102.16	6686.58	61137.5	0.965674	MSS	0.46	2	FALSE	NA	NA	0.999998	1e-06	1e-06	African	6253224	0.00217503	36112557	0.0125609	0.0147359	10623994	0.0036953	22843608	0.0079456	0.0116409	7487977	48832570	112	0	FALSE	2628	279
SMU091	SMU091	South Africa	Biopsy	75-79	117.8	1	LRPCa	TREATMENT-NAÏVE						NovaSeq HRPCa	52.8836	114.011	8047.63	72064.9	1.35557	MSS	0.48	2	FALSE	NA	NA	0.999999	1e-06	1e-06	African	3571494	0.00124226	25438270	0.00884809	0.0100903	5014743	0.00174426	27685796	0.00962984	0.0113741	4434885	30291873	118	0	FALSE	3654	425
SMU094	SMU094	South Africa	Biopsy	60-64	15	4	HRPCa	TREATMENT-NAÏVE						NovaSeq HRPCa	44.0397	100.731	9673.19	57822.5	0.8125	MSS	0.5	2	FALSE	NA	NA	0.999998	1e-06	1e-06	African	7944494	0.0027633	32296672	0.0112336	0.0139969	6818562	0.00237167	12428781	0.00432305	0.00669472	9085238	57712064	78	0	FALSE	2175	249
SMU097	SMU097	South Africa	Biopsy	60-64	37.07	1 and 2	IRPCa	TREATMENT-NAÏVE						NovaSeq HRPCa	46.3131	88.8545	11201.1	77450.2	0.768782	MSS	0.47	2	TRUE	1	0	0.999998	1e-06	1e-06	African	5439475	0.00189199	36856534	0.0128197	0.0147116	8192039	0.0028494	46805851	0.0162803	0.0191297	6686696	49156362	106	0	FALSE	2099	219
SMU098	SMU098	South Africa	Biopsy	65-69	25.42	3	IRPCa	TREATMENT-NAÏVE						NovaSeq HRPCa	38.0387	77.0579	5636.26	55168.1	1.60719	MSS	0.42	2.1	TRUE	5	0	0.999998	1e-06	1e-06	African	143789875	0.0500138	258671144	0.0899725	0.139986	146106671	0.0508197	248875689	0.0865654	0.137385	152634888	338473701	458	0	FALSE	4214	630
SMU100	SMU100	South Africa	Biopsy	55-59	23.91	3	IRPCa	TREATMENT-NAÏVE						NovaSeq HRPCa	39.348	77.779	5876.2	71507.9	0.604275	MSS	0.5	2.1	FALSE	NA	NA	0.999998	1e-06	1e-06	African	10656101	0.00370647	12818205	0.0044585	0.00816497	8866319	0.00308393	13240545	0.0046054	0.00768934	11978412	13016208	70	1	TRUE	1649	173
SMU101	SMU101	South Africa	Biopsy	70-74	4.28	3	IRPCa	TREATMENT-NAÏVE						NovaSeq HRPCa	46.6564	94.6454	7009.73	61289.2	1.12565	MSS	0.48	2	FALSE	NA	NA	0.999998	1e-06	1e-06	African	8338814	0.00290046	12674121	0.00440839	0.00730884	6071102	0.00211169	12667335	0.00440603	0.00651771	9902414	13914212	72	2	TRUE	3048	323
SMU104	SMU104	South Africa	Biopsy	75-79	52.5	4	HRPCa	TREATMENT-NAÏVE						NovaSeq HRPCa	42.4509	86.782	7232.14	62184.6	1.69365	MSS	0.51	2	FALSE	NA	NA	0.999998	1e-06	1e-06	African	35626553	0.0123918	42697696	0.0148514	0.0272432	35704531	0.012419	24812148	0.00863031	0.0210493	42500539	44303115	90	1	TRUE	4488	606
SMU106	SMU106	South Africa	Biopsy	65-69	43.93	unknown	IRPCa	TREATMENT-NAÏVE						NovaSeq HRPCa	40.7853	97.7337	6902.7	64678.4	0.707578	MSS	0.52	2	FALSE	NA	NA	0.999998	1e-06	1e-06	African	9447993	0.00328626	78605786	0.0273411	0.0306274	8503768	0.00295783	38609507	0.0134294	0.0163872	12046604	77323386	116	0	FALSE	1814	296
SMU107	SMU107	South Africa	Biopsy	70-74	53.1	1	LRPCa	TREATMENT-NAÏVE						NovaSeq HRPCa	47.2568	94.5508	6668.43	63986.8	0.946244	MSS	0.47	2	TRUE	1	0	0.999999	1e-06	1e-06	African	12241340	0.00425785	97681172	0.033976	0.0382339	8764144	0.0030484	90154489	0.0313581	0.0344065	24900861	143058988	130	1	TRUE	2549	299
SMU109	SMU109	South Africa	Biopsy	75-79	51	4	HRPCa	TREATMENT-NAÏVE						NovaSeq HRPCa	50.1936	95.0513	6273.98	37617.5	2.18426	MSS	0.34	2.6	TRUE	1	0	0.999998	1e-06	1e-06	African	340374845	0.118391	336916436	0.117188	0.235579	410632787	0.142829	280419713	0.0975372	0.240366	841035139	683100599	194	0	FALSE	5709	779
SMU111	SMU111	South Africa	Biopsy	60-64	583	unknown		TREATMENT-NAÏVE						NovaSeq HRPCa	43.3808	105.594	7980.41	20303.4	0.0625	MSS	0.5	2.1	FALSE	NA	NA	0.999998	1e-06	1e-06	African	13301159	0.00462649	47174707	0.0164086	0.0210351	9758895	0.0033944	10491797	0.00364932	0.00704371	14880722	54272104	86	0	FALSE	82	86
SMU132	SMU132	South Africa	Biopsy	70-74	149.76	4	HRPCa	TREATMENT-NAÏVE						NovaSeq HRPCa	56.9973	80.3381	5287.31	34530.7	1.23122	MSS	0.5	1.9	FALSE	NA	NA	0.999998	1e-06	1e-06	African	23991933	0.00834502	351648714	0.122313	0.130658	7667470	0.00266694	256084643	0.0890729	0.0917398	57232738	376375895	84	2	TRUE	3344	329
SMU141	SMU141	South Africa	Biopsy	55-59	8.2	1	LRPCa	TREATMENT-NAÏVE						NovaSeq HRPCa	43.5173	97.6717	3236.68	42771.1	0.168394	MSS	0.5	2.1	FALSE	NA	NA	0.999998	1e-06	1e-06	African	43682388	0.0151939	38113885	0.013257	0.0284509	36343769	0.0126413	54723455	0.0190342	0.0316755	74092202	41862248	86	0	FALSE	386	102
SMU142	SMU142	South Africa	Biopsy	55-59	100	1	LRPCa	TREATMENT-NAÏVE						NovaSeq HRPCa	44.1122	96.7232	3227.95	20466.6	1.78044	MSS	0.4	2.3	TRUE	7	0	0.999998	1e-06	1e-06	African	122932240	0.042759	152473679	0.0530343	0.0957933	78295160	0.0272331	153844251	0.053511	0.0807441	286246318	268812838	428	0	FALSE	4667	657
SMU157	SMU157	South Africa	Biopsy	60-64	33.5	4	HRPCa	TREATMENT-NAÏVE						NovaSeq HRPCa	39.0463	86.8549	3938.43	20081.8	0.0556995	MSS	0.56	2.2	FALSE	NA	NA	0.999998	1e-06	1e-06	African	34444721	0.0119808	38163635	0.0132743	0.0252551	18338795	0.00637871	52584269	0.0182902	0.0246689	45893521	30827490	44	0	FALSE	73	87
SMU159	SMU159	South Africa	Biopsy	50-54	25	2	IRPCa	TREATMENT-NAÏVE						NovaSeq HRPCa	44.826	76.6139	6722.54	25323.1	0.0625	MSS	0.45	2.5	FALSE	NA	NA	0.921495	0.010089	0.068417	Admixed	196128865	0.0682187	153543567	0.0534064	0.121625	278834996	0.096986	158184407	0.0550206	0.152007	277330445	229487372	46	0	FALSE	102	56
SMU161	SMU161	South Africa	Biopsy	65-69	unknown	4	HRPCa	TREATMENT-NAÏVE						NovaSeq HRPCa	43.7503	87.3723	4221.35	19165.3	2.39281	MSS	0.47	2.2	TRUE	7	0	0.999998	1e-06	1e-06	African	95763663	0.0333091	274204828	0.0953755	0.128685	79196056	0.0275464	286789003	0.0997526	0.127299	179561357	297927430	640	1	TRUE	6157	1018
SMU167	SMU167	South Africa	Biopsy	70-74	35.69	unknown	HRPCa	TREATMENT-NAÏVE						NovaSeq HRPCa	52.2029	97.7373	4980.55	48461.6	1.38601	MSS	0.34	1.9	TRUE	1	0	0.999999	1e-06	1e-06	African	27699033	0.00963444	180066667	0.0626319	0.0722663	22421806	0.00779889	176628018	0.0614358	0.0692347	130536850	350944543	288	0	FALSE	3695	457
SMU177	SMU177	South Africa	Biopsy	50-54	7	2	IRPCa	TREATMENT-NAÏVE						NovaSeq HRPCa	36.5756	71.7206	3458.7	20435.6	0.465997	MSS	0.46	2.1	FALSE	NA	NA	0.999998	1e-06	1e-06	African	25361805	0.00882149	58361642	0.0202997	0.0291212	14844779	0.0051634	45755652	0.015915	0.0210784	55130586	80350387	98	0	FALSE	1206	167
SMU183	SMU183	South Africa	Biopsy	65-69	81.86	4	HRPCa	TREATMENT-NAÏVE						NovaSeq HRPCa	40.2955	87.0653	4767.22	42675.2	0.153174	MSS	0.53	2	FALSE	NA	NA	0.999998	1e-06	1e-06	African	6110376	0.00212535	17707742	0.00615921	0.00828456	8767533	0.00304958	13815649	0.00480544	0.00785502	6737377	16680960	82	0	FALSE	349	91
SMU195	SMU195	South Africa	Biopsy	70-74	250	4	HRPCa	TREATMENT-NAÏVE						NovaSeq HRPCa	38.7778	129.826	4340.35	92426.3	2.14508	MSS	0.49	2	TRUE	4	1	0.999998	1e-06	1e-06	African	14408136	0.00501152	258396418	0.089877	0.0948885	12202504	0.00424435	268407461	0.0933591	0.0976034	28245718	300975563	534	0	FALSE	5371	1069
SMU196	SMU196	South Africa	Biopsy	45-49	9.46	1	LRPCa	TREATMENT-NAÏVE						NovaSeq HRPCa	55.7073	116.184	6457	66797.7	0.599741	MSS	0.53	2	TRUE	3	0	0.999998	1e-06	1e-06	African	350093113	0.121771	529790153	0.184275	0.306046	6095647	0.00212022	130987304	0.0455608	0.047681	418950925	520950754	70	0	FALSE	1553	208
SMU200	SMU200	South Africa	Biopsy	50-54	62.38	1	LRPCa	TREATMENT-NAÏVE						NovaSeq HRPCa	54.2072	81.3922	7099	31092.7	0.0534326	MSS	0.34	1.7	FALSE	NA	NA	0.999998	1e-06	1e-06	African	448773516	0.156095	657982249	0.228863	0.384958	7860286	0.00273401	98199606	0.0341564	0.0368904	969868433	838030998	28	0	FALSE	78	72
TSH001	TSH001	South Africa	Biopsy	65-69	42.96	5	HRPCa	TREATMENT-NAÏVE						NovaSeq HRPCa	54.0265	81.1691	7125.66	36006.1	0.0288212	MSS	0.48	2	FALSE	NA	NA	0.999998	1e-06	1e-06	African	10267646	0.00357135	99610454	0.0346471	0.0382184	5335934	0.00185598	67864719	0.0236051	0.0254611	15964915	115915837	30	0	FALSE	40	44
TSH003	TSH003	South Africa	Biopsy	75-79	41	2	IRPCa	TREATMENT-NAÏVE						NovaSeq HRPCa	39.3968	75.0815	6586.3	35338.5	0.169041	MSS	0.59	2	FALSE	NA	NA	0.999998	1e-06	1e-06	African	12653515	0.00440122	155297163	0.0540164	0.0584176	10234124	0.00355969	284982738	0.0991244	0.102684	12955915	132506948	38	NA	NA	434	57
TSH005	TSH005	South Africa	Biopsy	55-59	100	4	HRPCa	TREATMENT-NAÏVE						NovaSeq HRPCa	46.6345	76.4431	6193.12	48903.1	0.927461	MSS	0.45	1.7	TRUE	3	0	0.999998	1e-06	1e-06	African	395786999	0.137665	424721832	0.147729	0.285394	397940578	0.138414	512089101	0.178118	0.316532	580608544	540658145	242	0	FALSE	2478	269
TSH008	TSH008	South Africa	Biopsy	85-89	37.1	5	HRPCa	TREATMENT-NAÏVE						NovaSeq HRPCa	57.9815	123.809	9351.37	191786	2.09229	MSS	0.64	5.3	TRUE	1	0	0.999998	1e-06	1e-06	African	400092939	0.139163	594589055	0.206813	0.345976	304501042	0.105913	514395980	0.17892	0.284834	359980528	496801902	124	2	TRUE	5566	645
TSH012	TSH012	South Africa	Biopsy	80-85	unknown	unknown	HRPCa	TREATMENT-NAÏVE						NovaSeq HRPCa	40.2059	76.8109	5775.97	39935.5	0.0378886	MSS	0.43	2	FALSE	NA	NA	0.999998	1e-06	1e-06	African	17123781	0.00595609	218140571	0.0758749	0.081831	12126238	0.00421782	243186666	0.0845866	0.0888044	78715978	263458771	50	0	FALSE	51	54
UP2003	UP2003	South Africa	Biopsy	75-79	3459	5	HRPCa	TREATMENT-NAÏVE						HiSeq(CancerRes)	43.7626	86.9438	5705.04	56566.9	3.93556	MSS	0.42	2.1	TRUE	6	1	0.855495	1e-06	0.144503	Admixed	304481118	0.105906	434494000	0.151128	0.257035	299211879	0.104074	432268995	0.150354	0.254428	329099720	496125752	846	0	FALSE	10002	1760
UP2004	UP2004	South Africa	Biopsy	70-74	100	5	HRPCa	TREATMENT-NAÏVE						NovaSeq HRPCa	53.26	115.85	5190.06	34725.5	1.0204	MSS	0.42	2.1	TRUE	1	0	0.999998	1e-06	1e-06	African	7108894	0.00247266	24787971	0.0086219	0.0110946	12324661	0.00428684	23925700	0.00832198	0.0126088	10270060	55284949	400	0	FALSE	2693	373
UP2035	UP2035	South Africa	Biopsy	70-74	680	5	HRPCa	TREATMENT-NAÏVE						NovaSeq HRPCa	52.0136	108.902	4706.41	33157.1	0.304404	MSS	0.39	2.1	FALSE	NA	NA	0.999998	1e-06	1e-06	African	5963434	0.00207424	5868188	0.00204111	0.00411535	6477823	0.00225316	5727962	0.00199233	0.00424549	6992215	19896014	86	0	FALSE	774	121
UP2037	UP2037	South Africa	Biopsy	65-69	7.58	0	NOPCa	TREATMENT-NAÏVE						NovaSeq HRPCa	63.1608	100.896	5615.3	24624.3	0.0408031	MSS	0.37	2.1	FALSE	NA	NA	0.999999	1e-06	1e-06	African	5161865	0.00179543	5561190	0.00193433	0.00372976	7929541	0.0027581	8653596	0.00300994	0.00576805	6816089	15395129	32	0	FALSE	55	61
UP2039	UP2039	South Africa	Biopsy	70-74	319	4	HRPCa	TREATMENT-NAÏVE						HiSeq(CancerRes)	41.402	76.1251	3933.88	28450.3	2.56088	MSS	0.64	2.1	FALSE	NA	NA	0.999998	1e-06	1e-06	African	175317437	0.0609799	308955689	0.107463	0.168443	189608752	0.0659508	281364348	0.0978658	0.163817	172326375	240640447	72	0	FALSE	6631	1107
UP2041	UP2041	South Africa	Biopsy	75-79	5.2	0	NOPCa	TREATMENT-NAÏVE						NovaSeq HRPCa	52.7287	81.4942	4118.36	25265.6	0.0246114	MSS	0.39	2.1	FALSE	NA	NA	3e-06	0.025648	0.974349	European	7557113	0.00262856	6847207	0.00238164	0.0050102	8396994	0.00292069	8057983	0.00280277	0.00572347	9466725	25679033	36	0	FALSE	41	29
UP2048	UP2048	South Africa	Biopsy	55-59	8.21	5	HRPCa	TREATMENT-NAÏVE						NovaSeq HRPCa	52.7586	87.3527	7304.6	18928	0.0492228	MSS	0.44	2.1	FALSE	NA	NA	0.999998	1e-06	1e-06	African	7223369	0.00251248	7193768	0.00250218	0.00501465	12035438	0.00418624	9300950	0.00323511	0.00742135	8282181	11595007	34	0	FALSE	78	57
UP2049	UP2049	South Africa	Biopsy	70-74	259	5	HRPCa	TREATMENT-NAÏVE						NovaSeq HRPCa	48.0558	105.577	4930.78	34874.7	0.10557	MSS	0.46	2	FALSE	NA	NA	0.999999	1e-06	1e-06	African	102592784	0.0356844	346879755	0.120654	0.156338	7736962	0.00269112	6948797	0.00241697	0.00510809	258270070	418036623	58	0	FALSE	215	68
UP2050	UP2050	South Africa	Biopsy	65-69	581	5	HRPCa	TREATMENT-NAÏVE						NovaSeq HRPCa	38.3531	71.6129	2891.36	29414.7	3.00356	MSS	0.41	2.7	TRUE	3	0	0.999998	1e-06	1e-06	African	539261467	0.187569	116194832	0.0404156	0.227985	676123626	0.235173	111459387	0.0387685	0.273942	643741716	125343262	1060	2	TRUE	8039	973
UP2063	UP2063	South Africa	Biopsy	70-74	6	0	NOPCa	TREATMENT-NAÏVE						NovaSeq HRPCa	46.425	85.1913	3531	93980.1	0.0660622	MSS	0.47	1.9	FALSE	NA	NA	0.999998	1e-06	1e-06	African	267650029	0.0930956	424449617	0.147635	0.24073	104986820	0.0365171	35450182	0.0123305	0.0488476	370766945	470859853	32	0	FALSE	112	70
UP2089	UP2089	South Africa	Biopsy	55-59	183	5	HRPCa	TREATMENT-NAÏVE						NovaSeq HRPCa	36.8915	93.6657	3443.84	48814.4	1.36528	MSS	0.83	2	TRUE	2	0	0.999998	1e-06	1e-06	African	110104885	0.0382973	425086841	0.147856	0.186154	108547149	0.0377555	421246721	0.146521	0.184276	108266832	392043899	220	1	TRUE	3292	833
UP2092	UP2092	South Africa	Biopsy	70-74	14	5	HRPCa	TREATMENT-NAÏVE						NovaSeq HRPCa	48.5899	83.6733	4877.96	16406.1	0.0346503	MSS	0.49	2	FALSE	NA	NA	0.999998	1e-06	1e-06	African	3344904	0.00116344	15341860	0.0053363	0.00649974	3847540	0.00133827	14702336	0.00511385	0.00645213	6356975	20454005	48	0	FALSE	56	40
UP2093	UP2093	South Africa	Biopsy	70-74	80	5	HRPCa	TREATMENT-NAÏVE						NovaSeq HRPCa	44.4948	90.7193	6073.43	38763.2	2.19139	MSS	0.49	2	TRUE	4	0	0.999998	1e-06	1e-06	African	176211348	0.0612909	330305682	0.114889	0.17618	138709082	0.0482466	285468169	0.0992932	0.14754	231070808	351859654	470	1	TRUE	5961	675
UP2099	UP2099	South Africa	Biopsy	75-79	100	4	HRPCa	TREATMENT-NAÏVE						HiSeq(CancerRes)	43.2284	82.1817	2597.84	58545.7	2.62047	MSS	0.79	2.1	TRUE	3	0	0.999998	1e-06	1e-06	African	268442530	0.0933713	401559542	0.139673	0.233044	250425279	0.0871044	465470750	0.161903	0.249007	181601575	163959283	346	0	FALSE	6373	1548
UP2100	UP2100	South Africa	Biopsy	70-74	100	4	HRPCa	TREATMENT-NAÏVE						NovaSeq HRPCa	61.8913	109.938	6632.9	95162.8	0.0420984	MSS	0.43	2.1	FALSE	NA	NA	0.999998	1e-06	1e-06	African	12982406	0.00451562	11680046	0.00406262	0.00857824	11406081	0.00396733	15508773	0.00539435	0.00936168	51673589	18497162	36	0	FALSE	43	78
UP2101	UP2101	South Africa	Biopsy	55-59	75	5	HRPCa	TREATMENT-NAÏVE						NovaSeq HRPCa	45.7378	89.4696	6592.45	26288.4	1.50907	MSS	0.56	2.2	TRUE	2	1	0.999999	1e-06	1e-06	African	222523226	0.0773993	254495231	0.08852	0.165919	188774624	0.0656607	247822541	0.0861991	0.15186	231698996	250937057	248	0	FALSE	4010	557
UP2103	UP2103	South Africa	Biopsy	65-69	100	5	HRPCa	TREATMENT-NAÏVE						NovaSeq HRPCa	39.8547	91.4184	4236.07	27059.8	5.08614	MSS	0.51	2.3	TRUE	3	0	0.999998	1e-06	1e-06	African	492631101	0.17135	226265845	0.0787011	0.250051	513584104	0.178638	210723706	0.0732952	0.251933	511694940	227331852	618	4	TRUE	13211	1969
UP2109	UP2109	South Africa	Biopsy	60-64	10	4	HRPCa	TREATMENT-NAÏVE						NovaSeq HRPCa	57.0979	90.3652	7563.15	40586.9	0.114637	MSS	0.32	2.1	FALSE	NA	NA	0.999998	1e-06	1e-06	African	7345683	0.00255502	9609480	0.00334243	0.00589745	9368324	0.00325855	7522823	0.00261663	0.00587518	10518735	41955460	32	NA	NA	260	66
UP2113	UP2113	South Africa	Biopsy	85-89	123	4	HRPCa	TREATMENT-NAÏVE						HiSeq(CancerRes)	59.4833	86.8708	4685.88	69414.3	59.6101	MSI-H	0.38	2.1	TRUE	2	0	0.999998	1e-06	1e-06	African	10296022	0.00358122	27184939	0.00945563	0.0130368	14379145	0.00500144	24650105	0.00857394	0.0135754	14323435	74013534	130	0	FALSE	143574	35462
UP2115	UP2115	South Africa	Biopsy	55-59	21	4	HRPCa	TREATMENT-NAÏVE						NovaSeq HRPCa	46.054	139.058	6922.55	57806	0.0906736	MSS	0.51	2.1	FALSE	NA	NA	0.999998	1e-06	1e-06	African	7601091	0.00264386	9013635	0.00313518	0.00577903	9742766	0.00338879	7964550	0.00277028	0.00615906	8499101	9118640	104	NA	NA	154	99
UP2116	UP2116	South Africa	Biopsy	95-99	65	5	HRPCa	TREATMENT-NAÏVE						HiSeq(CancerRes)	41.7801	88.6941	3670.8	70901.3	2.10201	MSS	0.43	2.2	TRUE	3	0	0.999998	1e-06	1e-06	African	237069957	0.0824591	235257824	0.0818288	0.164288	203596847	0.0708163	244892288	0.0851799	0.155996	253500563	290998390	166	NA	NA	5159	1146
UP2117	UP2117	South Africa	Biopsy	65-69	433	5	HRPCa	TREATMENT-NAÏVE						NovaSeq HRPCa	49.2435	111.877	3782.49	35758.8	0.0612047	MSS	0.5	2.1	FALSE	NA	NA	0.999998	1e-06	1e-06	African	10241146	0.00356214	10900930	0.00379163	0.00735376	11222037	0.00390332	9512909	0.00330884	0.00721215	18297126	11044328	60	0	FALSE	91	87
UP2119	UP2119	South Africa	Biopsy	50-54	9	4	HRPCa	TREATMENT-NAÏVE						NovaSeq HRPCa	44.3377	101.337	4514.15	43795.9	0.791127	MSS	0.45	2.1	TRUE	2	0	0.956954	1e-06	0.043045	Admixed	15919362	0.00553717	10250102	0.00356525	0.00910242	59665179	0.0207531	17977536	0.00625305	0.0270061	70032953	16120892	188	0	FALSE	2120	263
UP2123	UP2123	South Africa	Biopsy	60-64	8.2	5	HRPCa	TREATMENT-NAÏVE						NovaSeq HRPCa	57.73	97.4321	5196.61	37181.8	0.840997	MSS	0.4	2.1	FALSE	NA	NA	3e-06	0.263423	0.736575	European	10413963	0.00362225	10087971	0.00350886	0.0071311	9458243	0.00328982	7223626	0.00251256	0.00580239	25916186	12448024	112	0	FALSE	2097	431
UP2133	UP2133	South Africa	Biopsy	55-59	100	5	HRPCa	TREATMENT-NAÏVE						HiSeq(CancerRes)	43.6908	82.5613	3109.21	55694.3	4.13018	MSS	0.4	2.7	TRUE	3	0	0.999998	1e-06	1e-06	African	400242795	0.139215	323789657	0.112622	0.251837	452664929	0.157449	319923656	0.111278	0.268726	596213359	532946928	1086	1	TRUE	10597	1781
UP2142	UP2142	South Africa	Biopsy	70-74	625	5	HRPCa	TREATMENT-NAÏVE						NovaSeq HRPCa	41.0965	92.2279	4312.03	17615.5	1.35589	MSS	0.56	2.3	TRUE	1	0	0.999998	1e-06	1e-06	African	436742516	0.15191	420337184	0.146204	0.298115	465457266	0.161898	321465048	0.111814	0.273712	474613919	360727817	254	0	FALSE	3640	425
UP2153	UP2153	South Africa	Biopsy	60-64	11.3	3	IRPCa	TREATMENT-NAÏVE						HiSeq	37.1011	71.0651	5074.85	38967.4	2.37856		0.45	2.1	TRUE	1	1	3e-06	1e-06	0.999996	European	136942743	0.0476322	323535917	0.112534	0.160166	126962650	0.0441609	336845228	0.117163	0.161324	143544349	326181729	196	1	TRUE	5513	741
UP2159	UP2159	South Africa	Biopsy	65-69	11.9	4	HRPCa	TREATMENT-NAÏVE						NovaSeq HRPCa	38.794	117.06	4073.87	25646.1	0.202396	MSS	0.52	2.1	FALSE	NA	NA	0.999998	1e-06	1e-06	African	14431364	0.0050196	90580470	0.0315062	0.0365258	9779330	0.0034015	86871927	0.0302163	0.0336178	26558770	88614474	166	NA	NA	479	127
UP2187	UP2187	South Africa	Biopsy	65-69	130	4	HRPCa	TREATMENT-NAÏVE						NovaSeq HRPCa	47.9887	100.421	3782.62	25793.7	1.53595	MSS	0.5	5.9	TRUE	5	0	0.999998	1e-06	1e-06	African	726834101	0.252812	813676133	0.283018	0.535829	810817480	0.282023	782104117	0.272036	0.554059	805480258	823410533	388	1	TRUE	3876	726
UP2197	UP2197	South Africa	Biopsy	50-54	37	4	HRPCa	TREATMENT-NAÏVE						NovaSeq HRPCa	46.4497	69.8241	3511.99	21827.7	1.14832	MSS	0.4	2.2	TRUE	3	0	0.983711	1e-06	0.016288	African	403036233	0.140186	338533051	0.117751	0.257937	221114575	0.0769094	286224011	0.0995561	0.176466	564689318	447135770	138	0	FALSE	3106	332
UP2213	UP2213	South Africa	Biopsy	65-69	25.8	5	HRPCa	TREATMENT-NAÏVE						NovaSeq HRPCa	43.0345	76.7104	3429.42	23622.6	0.557319	MSS	0.47	2.2	TRUE	1	0	0.999998	1e-06	1e-06	African	188860700	0.0656906	167295306	0.0581896	0.12388	153036760	0.0532301	110444614	0.0384155	0.0916456	268979463	220822111	100	0	FALSE	1557	119
UP2258	UP2258	South Africa	Biopsy	60-64	2000	5	HRPCa	TREATMENT-NAÏVE						NovaSeq HRPCa	38.9207	71.556	2763.72	13998.4	2.73381	MSS	0.42	5.1	TRUE	5	0	0.629861	1e-06	0.370138	Admixed	803871131	0.279607	863119018	0.300215	0.579822	687755324	0.239219	787434705	0.27389	0.513109	932849841	942982282	222	0	FALSE	7341	887
UP2264	UP2264	South Africa	Biopsy	65-69	28	4	HRPCa	TREATMENT-NAÏVE						NovaSeq HRPCa	51.7565	99.3237	7780.67	31412.8	0.0615285	MSS	0.42	2.1	FALSE	NA	NA	0.999998	1e-06	1e-06	African	4834305	0.0016815	8460933	0.00294293	0.00462443	9225502	0.00320887	11431187	0.00397606	0.00718493	5632568	9262753	40	NA	NA	114	70
UP2267	UP2267	South Africa	Biopsy	65-69	4847	4	HRPCa	TREATMENT-NAÏVE						NovaSeq HRPCa	53.9481	90.5169	2903.68	52934.4	2.28886	MSS	0.88	2	TRUE	2	1	0.999998	1e-06	1e-06	African	9983340	0.00347246	162834668	0.0566381	0.0601106	10393246	0.00361504	143214618	0.0498138	0.0534288	7219518	140934521	454	NA	NA	5898	924
UP2317	UP2317	South Africa	Biopsy	55-59	18	4	HRPCa	TREATMENT-NAÏVE						NovaSeq HRPCa	39.7494	80.5921	4639.28	39784.3	0.372409	MSS	0.55	2.1	FALSE	NA	NA	0.999998	1e-06	1e-06	African	258856016	0.0900368	398425771	0.138583	0.22862	85894742	0.0298764	227789067	0.0792309	0.109107	297166816	377309379	124	0	FALSE	965	144
UP2330	UP2330	South Africa	Biopsy	55-59	52.2	5	HRPCa	TREATMENT-NAÏVE						NovaSeq HRPCa	43.6644	79.0538	2391.74	65119.1	174.85	MSI-H	0.43	3.7	TRUE	10	0	0.999998	1e-06	1e-06	African	892592331	0.310467	876416535	0.30484	0.615307	785947846	0.273373	750567542	0.261067	0.53444	997257647	936278350	928	2	TRUE	349933	175107
UP2351	UP2351	South Africa	Biopsy	65-69	92	5	HRPCa	TREATMENT-NAÏVE						NovaSeq HRPCa	35.2334	89.0846	4391.95	71875.5	1.86885	MSS	0.62	2.7	TRUE	6	0	0.999998	1e-06	1e-06	African	752915920	0.261884	695992490	0.242084	0.503968	655651341	0.228053	520469372	0.181033	0.409085	737750942	559337976	386	1	TRUE	4714	898
UP2360	UP2360	South Africa	Biopsy	60-64	8.1	4	HRPCa	TREATMENT-NAÏVE						NovaSeq HRPCa	49.997	92.5315	5190.3	37767	1.44041	MSS	0.3	2	TRUE	3	0	0.999999	1e-06	1e-06	African	20664469	0.00718764	297426684	0.103453	0.11064	7943587	0.00276298	223091947	0.0775972	0.0803601	218222734	490521520	502	0	FALSE	3759	585
UP2370	UP2370	South Africa	Biopsy	60-64	1948	4	HRPCa	TREATMENT-NAÏVE						NovaSeq HRPCa	38.3706	80.2023	3546.86	29874.6	1.01231	MSS	0.45	2.2	TRUE	1	0	0.999998	1e-06	1e-06	African	289376626	0.100653	269854009	0.0938622	0.194515	301371666	0.104825	247225149	0.0859913	0.190816	299678961	280223615	206	1	TRUE	2678	314
UP2372	UP2372	South Africa	Biopsy	65-69	37.4	5	HRPCa	TREATMENT-NAÏVE						NovaSeq HRPCa	43.6129	89.8235	5574.4	25033.3	2.66516	MSS	0.42	2	TRUE	3	0	0.999999	1e-06	1e-06	African	20268075	0.00704976	293574719	0.102113	0.109163	9916478	0.00344921	228253263	0.0793924	0.0828416	67856303	350880645	312	1	TRUE	7324	657
UP2380	UP2380	South Africa	Biopsy	65-69	134	4	HRPCa	TREATMENT-NAÏVE						NovaSeq HRPCa	71.3379	76.9169	9859.65	12250.8	1.22247	MSS	0.26	4	TRUE	2	0	0.999998	1e-06	1e-06	African	381909793	0.132838	655908826	0.228142	0.36098	447681806	0.155715	477530051	0.166097	0.321813	997092788	945635644	162	0	FALSE	3361	294
UP2396	UP2396	South Africa	Biopsy	70-74	26.8	5	HRPCa	TREATMENT-NAÏVE						NovaSeq HRPCa	51.5335	132.483	6447.97	33996.5	2.72409	MSS	0.51	2.2	TRUE	7	0	0.999998	1e-06	1e-06	African	372843504	0.129685	368975706	0.128339	0.258024	404581834	0.140724	343104154	0.119341	0.260065	435777311	376201900	492	1	TRUE	7121	1068

## Sheet: qualimap_qc
sample	number_of_reads	number_of_mapped_reads	number_of_supplementary_alignments	reads_first_in_pair	reads_second_in_pair	reads_both_in_pair	reads_singletons	number_of_mapped_bases	duplicated_reads	median_insert_size	mean_mapping_quality	number_of_A	number_of_C	number_of_T	number_of_G	number_of_N	GC_percentage	mean_coverage	chrM_coverage
10651-1042378-B	993883330	960,073,430_(96.6%)	34,113,155_(3.43%)	482508126	477565304	954544316	5529114	139949132706	111137504	429	36.7978	41,005,373,730_(29.36%)	28,602,086,585_(20.48%)	41,197,502,695_(29.5%)	28,838,910,630_(20.65%)	248,877,601_(0.18%)	0.4113	43.4983X	5173.48
10651-1042378-T	2054882735	2,030,091,568_(98.79%)	72,594,837_(3.53%)	1019915822	1010175746	2018996067	11095501	296634043939	184126783	437	37.2244	87,212,676,871_(29.42%)	60,595,427,632_(20.44%)	87,581,706,886_(29.54%)	61,075,874,435_(20.6%)	44,390,947_(0.01%)	0.4104	92.1983X	21842.8
10651-B	974451489	970,959,792_(99.64%)	34,288,934_(3.52%)	485976154	484983638	968432960	2526832	141215765727	144099919	298	38.1544	41,749,411,242_(29.58%)	28,649,423,380_(20.3%)	41,953,505,482_(29.72%)	28,805,105,824_(20.41%)	2,736,466_(0%)	0.407	43.892X	5863.79
10651-T	1921488680	1,914,513,295_(99.64%)	68,321,343_(3.56%)	957947656	956565639	1909431375	5081920	281005369028	304527869	367	39.5188	82,752,716,984_(29.46%)	57,359,264,356_(20.42%)	83,128,626,360_(29.6%)	57,645,084,005_(20.52%)	4,299,677_(0%)	0.4094	87.3407X	16131.8
10734-B	1261241871	1,258,392,728_(99.77%)	47,164,740_(3.74%)	629350966	629041762	1256195845	2196883	184956826759	229019272	412	39.9634	53,968,679,110_(29.19%)	38,214,278,473_(20.67%)	54,338,866,728_(29.39%)	38,351,563,684_(20.74%)	1,283,353_(0%)	0.4142	57.4874X	5015.14
10734-T	1767625743	1,763,549,418_(99.77%)	64,534,982_(3.65%)	882133737	881415681	1760569238	2980180	260150320139	310781512	429	40.3019	76,185,873,971_(29.3%)	53,516,148,257_(20.58%)	76,637,085,282_(29.47%)	53,696,891,844_(20.65%)	1,790,953_(0%)	0.4123	80.8586X	22869.6
10738-1042949-B	921803716	889,046,627_(96.45%)	31,415,046_(3.41%)	445972479	443074148	885744388	3302239	129292377779	267537322	399	36.9461	38,068,688,129_(29.46%)	26,357,673,742_(20.4%)	38,186,439,803_(29.55%)	26,592,501,216_(20.58%)	34,607,919_(0.03%)	0.4098	40.186X	5338.92
10738-1042949-T	1843485966	1,769,544,916_(95.99%)	62,960,717_(3.42%)	886525658	883019258	1765351858	4193058	260136320094	646316746	449	37.3363	76,231,639,155_(29.32%)	53,284,011,269_(20.5%)	76,513,513,514_(29.43%)	53,953,625,139_(20.75%)	34,515,891_(0.01%)	0.4125	80.8543X	19821.8
10764-B	812142300	810,546,495_(99.8%)	29,040,589_(3.58%)	405514303	405032192	809442626	1103869	119604506839	130733581	417	39.1897	35,198,461,512_(29.44%)	24,443,179,789_(20.45%)	35,344,266,422_(29.56%)	24,569,106,975_(20.55%)	564,938_(0%)	0.41	37.1749X	4009.47
10764-T	1755305833	1,752,040,890_(99.81%)	56,638,325_(3.23%)	876556819	875484071	1749731807	2309083	259026378251	280961269	399	39.9713	76,655,106,822_(29.6%)	52,788,297,530_(20.39%)	76,807,931,270_(29.66%)	52,685,853,502_(20.35%)	1,224,637_(0%)	0.4073	80.5093X	79562.6
11099-B	1286067878	1,284,132,386_(99.85%)	45,947,295_(3.57%)	642275964	641856422	1282566904	1565482	189387156345	215291374	405	39.3449	55,655,397,877_(29.4%)	38,770,171,723_(20.48%)	55,878,796,613_(29.52%)	39,005,410,470_(20.6%)	881,933_(0%)	0.4108	58.8644X	4317.57
11099-T	2154292662	2,150,538,254_(99.83%)	77,423,041_(3.59%)	1075820420	1074717834	2147707784	2830470	316749840698	371144235	400	39.9992	93,050,931,332_(29.39%)	64,884,259,887_(20.49%)	93,409,194,732_(29.5%)	65,275,521,387_(20.62%)	1,474,739_(0%)	0.4111	98.4506X	14477.7
11114-B	1361905315	1,359,518,840_(99.82%)	48,747,768_(3.58%)	679789326	679729514	1357418101	2100739	201182203619	310510257	421	38.7507	58,704,163,353_(29.19%)	41,595,939,260_(20.68%)	58,934,556,071_(29.31%)	41,860,179,908_(20.82%)	2,728,211_(0%)	0.415	62.5305X	9643.7
11114-T	2232490268	2,226,622,885_(99.74%)	70,566,207_(3.16%)	1113480369	1113142516	2221666277	4956608	329861615312	507046642	424	39.3847	97,227,866,489_(29.49%)	67,518,692,408_(20.48%)	97,478,449,065_(29.56%)	67,514,565,036_(20.48%)	4,468,048_(0%)	0.4095	102.526X	70208.9
11119-B	991893429	988,314,457_(99.64%)	35,120,088_(3.54%)	495172231	493142226	985260960	3053497	145630409831	118713254	386	39.125	42,963,289,369_(29.51%)	29,626,477,338_(20.35%)	43,169,876,594_(29.66%)	29,811,900,846_(20.48%)	1,326,365_(0%)	0.4083	45.2641X	4766.5
11119-T	1603050135	1,596,288,639_(99.58%)	56,271,701_(3.51%)	800189859	796098780	1590599070	5689569	234998911524	186288465	426	39.6837	69,399,343,692_(29.54%)	47,737,941,909_(20.32%)	69,721,126,641_(29.68%)	48,046,262,194_(20.45%)	2,134,416_(0%)	0.4078	73.0412X	10740.6
11129-B	1085685538	1,084,165,059_(99.86%)	39,282,700_(3.62%)	541944736	542220323	1082909219	1255840	160223573180	217504427	370	39.6068	46,867,336,566_(29.26%)	33,030,868,225_(20.62%)	47,106,748,536_(29.41%)	33,146,959,018_(20.7%)	2,169,659_(0%)	0.4132	49.7999X	7585.87
11129-T	1949589095	1,946,379,234_(99.84%)	60,594,655_(3.11%)	973173485	973205749	1943931631	2447603	288908786851	394079271	402	40.4023	85,202,198,066_(29.5%)	59,121,050,995_(20.47%)	85,424,894,935_(29.58%)	59,059,973,738_(20.45%)	3,913,892_(0%)	0.4092	89.7972X	63066
11141-B	941916834	940,217,976_(99.82%)	34,575,307_(3.67%)	470160166	470057810	938744961	1473015	138863415161	132898122	415	40.3718	40,390,735,991_(29.1%)	28,838,913,137_(20.78%)	40,630,511,870_(29.27%)	28,943,416,930_(20.85%)	1,299,149_(0%)	0.4163	43.1608X	5245.21
11141-T	2128080317	2,123,480,285_(99.78%)	64,350,870_(3.02%)	1062269436	1061210849	2119432655	4047630	314833191505	313167582	450	41.045	93,048,083,324_(29.56%)	64,227,443,911_(20.41%)	93,300,669,141_(29.64%)	64,151,390,922_(20.38%)	2,956,841_(0%)	0.4079	97.8549X	65265.4
11265-B	911665175	908,358,660_(99.64%)	32,615,735_(3.58%)	455094783	453263877	905720001	2638659	133704509151	125932544	375	37.8252	39,291,853,222_(29.4%)	27,381,542,953_(20.49%)	39,477,211,477_(29.54%)	27,498,322,995_(20.58%)	2,195,753_(0%)	0.4106	41.5574X	5547.14
11265-T	1825158503	1,816,804,879_(99.54%)	64,590,255_(3.54%)	910452462	906352417	1810675352	6129527	267268327220	261801893	405	38.9127	78,584,288,210_(29.42%)	54,686,399,910_(20.47%)	78,957,057,929_(29.55%)	54,925,781,742_(20.56%)	3,946,694_(0%)	0.4103	83.071X	8933.11
11452-1056021-B	1056168385	1,038,386,540_(98.32%)	37,396,238_(3.54%)	521143704	517242836	1034053619	4332921	151295746909	149255333	459	37.0332	44,333,510,879_(29.32%)	31,035,979,726_(20.53%)	44,514,785,217_(29.44%)	31,296,071,430_(20.7%)	53,384,826_(0.04%)	0.4123	47.025X	5399.11
11452-1056021-T	1578352125	1,544,112,416_(97.83%)	55,028,574_(3.49%)	776392566	767719850	1534349349	9763067	224214607650	242947381	475	37.0918	65,754,694,723_(29.34%)	45,651,412,795_(20.37%)	66,011,687,592_(29.46%)	46,663,139,434_(20.82%)	41,099,910_(0.02%)	0.412	69.6893X	15473
11532-B	2171683351	2,162,871,965_(99.59%)	79,256,620_(3.65%)	1082528383	1080343582	2157258994	5612971	313903866105	327176089	271	38.3819	92,485,914,691_(29.48%)	64,010,535,365_(20.4%)	93,067,826,398_(29.66%)	64,196,943,161_(20.46%)	6,079,247_(0%)	0.4086	97.5661X	13648.6
11532-T	2182010779	2,173,006,495_(99.59%)	77,602,458_(3.56%)	1087945299	1085061196	2166885242	6121253	319129171675	281815213	360	39.4313	94,283,634,179_(29.56%)	64,813,963,503_(20.32%)	94,850,560,318_(29.74%)	65,037,862,937_(20.39%)	6,057,885_(0%)	0.4071	99.1902X	12529.7
11590-B	870771329	869,532,452_(99.86%)	32,782,970_(3.76%)	434720882	434811570	868404883	1127569	127835608762	118620166	370	38.5209	37,143,385,572_(29.07%)	26,584,494,524_(20.81%)	37,368,186,494_(29.25%)	26,679,122,466_(20.88%)	1,206,734_(0%)	0.4169	39.7332X	5857.12
11590-T	1657292327	1,654,591,263_(99.84%)	63,374,301_(3.82%)	827324190	827267073	1652145970	2445293	243868518371	228045890	383	39.012	70,587,027,080_(28.96%)	51,009,877,529_(20.93%)	71,011,924,630_(29.13%)	51,146,317,801_(20.98%)	2,290,894_(0%)	0.4191	75.798X	22616.8
11830-B	1105567947	1,104,104,757_(99.87%)	40,030,704_(3.62%)	552013647	552091110	1102927518	1177239	163365275696	215605799	386	39.2148	47,747,882,748_(29.24%)	33,723,536,822_(20.65%)	47,990,861,173_(29.39%)	33,829,299,426_(20.72%)	2,193,683_(0%)	0.4137	50.7764X	7828.69
11830-T	1795522458	1,792,414,470_(99.83%)	63,402,589_(3.53%)	896193253	896221217	1789929165	2485305	265373560743	347099036	401	39.6622	77,652,952,651_(29.27%)	54,841,799,744_(20.67%)	77,927,980,053_(29.38%)	54,842,934,033_(20.67%)	3,572,564_(0%)	0.4135	82.4821X	56126.2
11874-B	1115554430	1,113,542,666_(99.82%)	39,661,113_(3.56%)	556991128	556551538	1111931749	1610917	164401488880	198505252	411	39.9406	48,236,302,791_(29.35%)	33,759,332,541_(20.54%)	48,463,676,169_(29.49%)	33,874,916,705_(20.61%)	1,138,051_(0%)	0.4116	51.0985X	2532.66
11874-T	2143172520	2,138,723,605_(99.79%)	77,280,215_(3.61%)	1070033317	1068690288	2135338935	3384670	315349227860	397335137	429	40.5552	92,342,714,154_(29.3%)	64,937,797,670_(20.6%)	92,787,290,643_(29.44%)	65,147,303,234_(20.67%)	2,183,553_(0%)	0.4127	98.0153X	13085.1
11926-B	981601488	978,418,029_(99.68%)	34,667,100_(3.53%)	489786446	488631583	975846444	2571585	143951772910	122097377	375	37.8758	42,596,671,403_(29.6%)	29,181,568,937_(20.28%)	42,859,246,781_(29.79%)	29,252,975,861_(20.33%)	1,315,370_(0%)	0.4061	44.7424X	6547.81
11926-T	1584698058	1,578,860,623_(99.63%)	56,315,287_(3.55%)	790717567	788143056	1574079961	4780662	232017911226	193230438	366	38.1778	68,322,119,913_(29.46%)	47,373,734,574_(20.43%)	68,709,498,788_(29.63%)	47,513,096,037_(20.49%)	2,198,659_(0%)	0.4091	72.1147X	9763.45
12103-B	859212940	857,455,458_(99.8%)	31,832,653_(3.7%)	429022305	428433153	856133188	1322270	126310992096	137483203	414	39.3069	37,045,371,534_(29.34%)	25,940,889,180_(20.55%)	37,220,534,382_(29.48%)	26,048,438,136_(20.63%)	588,418_(0%)	0.4118	39.2594X	2211.42
12103-T	3020556845	3,005,655,126_(99.51%)	110,358,941_(3.65%)	1502067128	1503587998	2997275796	8379330	441922347321	513129836	375	40.5753	129,625,087,245_(29.34%)	90,785,012,151_(20.55%)	130,238,761,465_(29.48%)	91,084,829,978_(20.62%)	2,088,887_(0%)	0.4117	137.3561X	31370.6
12333-B	889108889	886,720,715_(99.73%)	33,269,777_(3.74%)	443195377	443525338	884763659	1957056	130220076996	165763230	415	39.3327	38,054,164,690_(29.24%)	26,856,419,980_(20.63%)	38,327,299,891_(29.45%)	26,923,128,746_(20.68%)	1,571,787_(0%)	0.4132	40.4744X	3863.01
12543-1081384-B	997741279	986,844,959_(98.91%)	35,538,618_(3.56%)	495473871	491371088	982326066	4518893	144001416128	92764633	439	37.0846	42,168,207,043_(29.3%)	29,544,500,373_(20.53%)	42,379,578,819_(29.45%)	29,821,424,611_(20.72%)	26,541,229_(0.02%)	0.4125	44.7578X	5726.95
12543-1081384-T	2421742447	1,726,916,418_(71.31%)	62,416,892_(2.58%)	866679006	860237412	1715031601	11884817	251151979306	261989812	354	37.0565	73,538,242,806_(29.3%)	51,532,956,306_(20.53%)	73,895,252,406_(29.44%)	52,047,101,654_(20.73%)	35,789,281_(0.01%)	0.4126	78.0618X	15242.2
12571-B	980278019	978,471,365_(99.82%)	37,049,308_(3.78%)	489390979	489080386	976938679	1532686	144571934320	189904469	421	38.7353	42,072,093,645_(29.12%)	30,003,183,569_(20.76%)	42,366,452,001_(29.32%)	30,060,103,624_(20.8%)	1,941,453_(0%)	0.4157	44.9351X	4533.88
12571-T	2026435963	2,023,188,165_(99.84%)	76,615,959_(3.78%)	1011656259	1011531906	2020666700	2521465	299170381379	402628081	418	39.0662	87,022,752,577_(29.1%)	62,193,727,837_(20.8%)	87,526,155,805_(29.27%)	62,285,892,848_(20.83%)	4,035,872_(0%)	0.4163	92.9867X	37706
12596-B	721624532	720,513,836_(99.85%)	25,935,122_(3.59%)	360454499	360059337	719620526	893310	106219109086	103643654	412	38.4717	31,260,858,879_(29.44%)	21,718,916,668_(20.46%)	31,415,276,554_(29.59%)	21,778,548,635_(20.51%)	792,774_(0%)	0.4097	33.0145X	6568.79
12596-T	2481869880	2,475,438,863_(99.74%)	71,219,163_(2.87%)	1237833693	1237605170	2471692852	3746011	366523275846	357267367	392	39.5642	109,536,282,251_(29.89%)	73,704,703,053_(20.12%)	109,732,824,680_(29.95%)	73,431,903,235_(20.04%)	2,769,440_(0%)	0.4016	113.921X	133110
13019-B	957134142	955,866,416_(99.87%)	34,893,150_(3.65%)	477982044	477884372	954896655	969761	140733366816	179419815	383	39.3222	41,271,721,820_(29.34%)	28,901,189,624_(20.54%)	41,477,390,995_(29.48%)	29,022,942,324_(20.63%)	1,614,691_(0%)	0.4118	43.7421X	5669.15
13019-T	1956454450	1,952,489,468_(99.8%)	71,744,821_(3.67%)	976669485	975819983	1949833536	2655932	288146306060	373145782	384	41.1162	84,412,286,352_(29.31%)	59,274,271,695_(20.58%)	84,788,367,558_(29.44%)	59,547,197,041_(20.67%)	3,373,527_(0%)	0.4125	89.5602X	15364.9
13104-1095757-B	1072766154	1,062,629,192_(99.06%)	38,192,796_(3.56%)	533129145	529500047	1058308141	4321051	155758943181	160792172	479	37.1571	45,842,688,328_(29.45%)	31,779,608,683_(20.41%)	46,052,256,051_(29.58%)	31,995,358,765_(20.55%)	19,210,029_(0.01%)	0.4097	48.4122X	11993.5
13104-1095757-T	2009185092	1,701,422,518_(84.68%)	61,588,991_(3.07%)	855396726	846025792	1691128726	10293792	248563195909	365576857	451	37.1992	72,665,738,330_(29.25%)	51,110,062,009_(20.58%)	72,979,777,080_(29.38%)	51,639,658,394_(20.79%)	59,556,696_(0.02%)	0.4137	77.2572X	22811
13179-1096899-B	1007111702	979,911,738_(97.3%)	35,161,031_(3.49%)	491753029	488158709	976095605	3816133	143258764854	228390652	455	36.3072	41,977,970,337_(29.32%)	29,355,009,306_(20.51%)	42,138,361,356_(29.44%)	29,680,174,733_(20.73%)	43,307,448_(0.03%)	0.4124	44.527X	5329.43
13179-1096899-T	1939762643	1,910,315,635_(98.48%)	67,911,129_(3.5%)	958616366	951699269	1903009164	7306471	278279123952	215875448	423	36.4476	81,685,638,145_(29.37%)	57,047,162,234_(20.51%)	81,967,486,587_(29.47%)	57,430,347,477_(20.65%)	33,830,767_(0.01%)	0.4116	86.4934X	34485.2
13518-B	1065010831	1,063,413,733_(99.85%)	38,433,919_(3.61%)	531621176	531792557	1062347451	1066282	156213879951	202133987	345	38.6907	45,874,994,817_(29.38%)	32,002,049,280_(20.49%)	46,081,494,055_(29.51%)	32,187,896,787_(20.61%)	1,837,441_(0%)	0.4111	48.5536X	6003.53
13518-T	2174557328	2,171,163,761_(99.84%)	78,231,044_(3.6%)	1085712582	1085451179	2168887917	2275844	319032122612	417618524	348	38.935	93,679,751,199_(29.38%)	65,383,364,078_(20.5%)	94,058,382,070_(29.5%)	65,772,242,183_(20.63%)	3,772,305_(0%)	0.4113	99.16X	12760.2
14261-B	971436779	970,043,905_(99.86%)	35,531,119_(3.66%)	484989249	485054656	968859574	1184331	143448505768	194761160	417	39.5739	41,847,872,224_(29.19%)	29,675,360,443_(20.7%)	42,080,435,512_(29.35%)	29,777,740,057_(20.77%)	1,932,317_(0%)	0.4146	44.586X	4794.69
14261-T	1990303506	1,986,263,552_(99.8%)	64,415,365_(3.24%)	993020886	993242666	1983498379	2765173	294615447691	394980001	410	39.9971	86,563,281,878_(29.39%)	60,577,888,804_(20.57%)	86,797,887,811_(29.47%)	60,567,371,217_(20.57%)	3,968,621_(0%)	0.4114	91.5709X	64887.1
14365-B	1037453482	1,035,110,268_(99.77%)	37,396,437_(3.6%)	518060236	517050032	1033179523	1930745	152983111679	154635373	405	39.9022	44,886,074,054_(29.35%)	31,409,513,332_(20.54%)	45,106,758,723_(29.5%)	31,514,251,534_(20.61%)	1,238,632_(0%)	0.4115	47.5495X	11043.9
14365-T	1884442320	1,879,386,488_(99.73%)	58,325,667_(3.1%)	940560488	938826000	1875726030	3660458	278809688214	270213334	406	40.5468	82,808,187,465_(29.71%)	56,443,392,325_(20.25%)	83,020,749,071_(29.79%)	56,444,820,380_(20.25%)	2,297,880_(0%)	0.405	86.6583X	50278.4
14862-B	915582997	914,352,707_(99.87%)	32,741,950_(3.58%)	457180860	457171847	913421001	931706	134866458751	169518258	387	39.0729	39,607,157,405_(29.38%)	27,648,525,417_(20.51%)	39,792,491,210_(29.52%)	27,762,696,704_(20.59%)	1,575,354_(0%)	0.411	41.9185X	6351.38
14862-T	1883331367	1,880,566,138_(99.85%)	62,620,356_(3.32%)	940221651	940344487	1878753458	1812680	276494650125	372162544	352	39.6525	81,698,525,330_(29.56%)	56,371,524,991_(20.4%)	81,953,776,884_(29.65%)	56,367,609,374_(20.39%)	3,263,172_(0%)	0.4079	85.9387X	66284.4
14919-B	842429692	841,238,685_(99.86%)	30,725,819_(3.65%)	420917675	420321010	840181939	1056746	124062213566	130579151	404	38.6649	36,264,445,180_(29.24%)	25,606,674,004_(20.65%)	36,421,758,841_(29.37%)	25,718,225,214_(20.74%)	580,529_(0%)	0.4139	38.5604X	4727.73
14919-T	1791785646	1,788,022,363_(99.79%)	64,788,943_(3.62%)	894634920	893387443	1785345703	2676660	263839690765	288118914	405	39.3654	77,291,091,264_(29.31%)	54,281,201,668_(20.58%)	77,628,223,871_(29.43%)	54,531,969,742_(20.68%)	1,240,820_(0%)	0.4126	82.0054X	12426.4
15126-B	938573872	937,089,531_(99.84%)	34,573,530_(3.68%)	468472445	468617086	935814321	1275210	137836433788	131935498	372	38.6909	40,118,774,696_(29.12%)	28,594,918,797_(20.75%)	40,370,752,487_(29.3%)	28,691,935,485_(20.83%)	1,295,585_(0%)	0.4158	42.8416X	7860.79
15126-T	1600063999	1,597,752,908_(99.86%)	51,005,003_(3.19%)	798507625	799245283	1595779610	1973298	235289222900	214884681	347	39.3989	69,302,952,827_(29.46%)	48,275,515,751_(20.52%)	69,518,234,063_(29.56%)	48,108,413,364_(20.45%)	2,232,257_(0%)	0.4098	73.1314X	84680.3
15178-B	870992248	869,630,245_(99.84%)	30,806,107_(3.54%)	434989800	434640445	868619235	1011010	128492524844	126919641	417	39.0997	37,773,152,977_(29.41%)	26,325,436,136_(20.5%)	37,938,575,171_(29.54%)	26,404,475,659_(20.56%)	970,666_(0%)	0.4105	39.9374X	13140.8
15178-T	1565265344	1,562,357,658_(99.81%)	56,105,941_(3.58%)	781595782	780761876	1560177428	2180230	230571216441	220516236	425	39.5762	67,632,794,476_(29.34%)	47,350,650,642_(20.54%)	67,939,004,967_(29.48%)	47,556,183,428_(20.63%)	1,742,249_(0%)	0.4118	71.665X	11153.4
15917-1147612-B	1004079495	968,681,064_(96.47%)	34,670,688_(3.45%)	485782193	482898871	965035191	3645873	141783282598	273101512	464	37.7702	41,650,475,762_(29.39%)	28,957,125,242_(20.44%)	41,885,042,314_(29.56%)	29,209,702,872_(20.61%)	13,213,088_(0.01%)	0.4105	44.0684X	4691.69
15917-1147612-T	1948876800	1,906,440,199_(97.82%)	69,828,904_(3.58%)	960060507	946379692	1891966528	14473671	277616770283	268225350	343	37.7868	81,333,525,219_(29.31%)	56,941,010,799_(20.52%)	81,809,566,383_(29.48%)	57,377,774,083_(20.68%)	38,639,664_(0.01%)	0.412	86.2875X	21229.6
16000-B	1072419848	1,070,220,790_(99.79%)	38,721,519_(3.61%)	535601930	534618860	1068369646	1851144	158191897632	156218573	418	39.06	46,451,157,866_(29.38%)	32,439,969,350_(20.52%)	46,667,428,236_(29.51%)	32,566,690,427_(20.6%)	1,274,886_(0%)	0.4111	49.1684X	7465.66
16000-T	1906899412	1,901,433,922_(99.71%)	67,506,991_(3.54%)	951901667	949532255	1897158302	4275620	281023234910	274724177	429	39.6015	82,346,327,468_(29.31%)	57,845,157,672_(20.59%)	82,642,720,867_(29.42%)	58,068,534,006_(20.67%)	2,288,663_(0%)	0.4126	87.3463X	6966.66
16004-B	888516199	887,058,006_(99.84%)	31,533,570_(3.55%)	443645575	443412431	885807577	1250429	131268782590	123523045	423	37.9861	38,630,416,146_(29.44%)	26,828,799,500_(20.45%)	38,772,837,456_(29.55%)	26,982,883,527_(20.56%)	1,057,763_(0%)	0.4101	40.8003X	4301.82
16004-T	1830306339	1,826,859,197_(99.81%)	61,438,304_(3.36%)	913692398	913166799	1824159648	2699549	270473614531	260520282	391	38.4711	79,529,276,519_(29.41%)	55,513,171,990_(20.53%)	79,741,959,168_(29.49%)	55,592,210,804_(20.56%)	2,223,908_(0%)	0.4109	84.0673X	43811.5
16176-B	1159107853	1,156,891,194_(99.81%)	41,642,315_(3.59%)	578769937	578121257	1155157535	1733659	170784508423	221994931	412	40.1956	50,027,998,610_(29.31%)	35,133,834,477_(20.58%)	50,258,932,654_(29.44%)	35,292,117,221_(20.67%)	1,988,958_(0%)	0.4125	53.0824X	5592.5
16176-T	2016711145	2,012,494,893_(99.79%)	72,374,485_(3.59%)	1006886461	1005608432	2009583900	2910993	296315932099	375724049	410	40.4513	87,249,353,885_(29.46%)	60,504,868,702_(20.43%)	87,642,883,580_(29.59%)	60,791,726,854_(20.52%)	3,469,829_(0%)	0.4095	92.0995X	17679.2
16263-B	862971894	861,410,964_(99.82%)	30,862,383_(3.58%)	430894207	430516757	860069509	1341455	127391223356	122414533	422	37.7616	37,421,510,310_(29.39%)	26,085,791,895_(20.49%)	37,622,074,882_(29.55%)	26,207,149,349_(20.58%)	1,026,088_(0%)	0.4107	39.5951X	4393.44
16263-T	1970070585	1,964,199,775_(99.7%)	70,857,751_(3.6%)	983388474	980811301	1959458864	4740911	289806924943	294413866	436	39.8803	85,028,409,361_(29.35%)	59,470,377,282_(20.53%)	85,462,268,748_(29.5%)	59,722,246,226_(20.62%)	2,365,916_(0%)	0.4115	90.0764X	17300.3
16311-B	901584170	898,645,403_(99.67%)	32,194,495_(3.57%)	450105072	448540331	896257446	2387957	132467192313	126572708	389	37.783	38,920,233,611_(29.39%)	27,129,049,273_(20.49%)	39,102,258,864_(29.53%)	27,261,665,363_(20.59%)	2,101,859_(0%)	0.4108	41.1728X	4155.75
16311-T	1768705391	1,760,593,371_(99.54%)	55,697,850_(3.15%)	881938368	878655003	1755097265	5496106	259607526591	252926489	420	39.1045	77,323,162,169_(29.79%)	52,335,935,121_(20.17%)	77,517,782,764_(29.87%)	52,342,379,510_(20.17%)	3,866,181_(0%)	0.4034	80.6899X	47790.2
16599-1159140-B	1046289390	889,211,685_(84.99%)	31,126,788_(2.97%)	446237414	442974271	885309903	3901782	130561649556	218805684	395	37.4357	38,261,070,593_(29.32%)	26,757,767,952_(20.51%)	38,459,333,251_(29.48%)	27,000,330,652_(20.69%)	27,148,610_(0.02%)	0.412	40.5805X	2539.96
16599-1159140-T	2028844863	2,005,839,228_(98.87%)	71,334,500_(3.52%)	1007833838	998005390	1995125915	10713313	291248819802	152921875	467	37.2508	85,452,350,760_(29.36%)	59,684,562,112_(20.51%)	85,866,925,830_(29.5%)	60,058,421,183_(20.63%)	66,351,789_(0.02%)	0.4114	90.5245X	16168.1
16599-B	1037456396	1,035,769,512_(99.84%)	36,739,549_(3.54%)	518070339	517699173	1034428775	1340737	152979568851	199915120	389	39.3783	44,898,035,854_(29.36%)	31,385,871,368_(20.52%)	45,128,490,015_(29.51%)	31,503,400,345_(20.6%)	1,059,413_(0%)	0.4113	47.5484X	3383.2
16599-T	1598845363	1,595,595,540_(99.8%)	57,344,552_(3.59%)	798129046	797466494	1593100659	2494881	235087328669	289605160	398	40.4285	68,833,335,189_(29.29%)	48,396,009,129_(20.6%)	69,202,640,398_(29.45%)	48,553,199,684_(20.66%)	1,642,625_(0%)	0.4126	73.0687X	8657.22
16677-B	1231396994	1,229,342,083_(99.83%)	44,534,220_(3.62%)	614779599	614562484	1227703878	1638205	181382183621	229202521	394	38.7446	53,097,911,361_(29.29%)	37,355,612,096_(20.6%)	53,370,526,166_(29.44%)	37,478,323,491_(20.67%)	1,253,473_(0%)	0.4128	56.3763X	6711.81
16677-T	2530525173	2,524,882,520_(99.78%)	92,064,834_(3.64%)	1263487964	1261394556	2520804500	4078020	372705301605	495806197	441	39.3139	108,994,524,904_(29.26%)	76,916,671,384_(20.65%)	109,507,232,086_(29.39%)	77,125,584,329_(20.7%)	2,557,232_(0%)	0.4135	115.8424X	19061
16995-B	902262540	900,347,047_(99.79%)	31,917,760_(3.54%)	450303393	450043654	898931893	1415154	132923379869	171081943	428	39.191	39,018,865,054_(29.37%)	27,266,430,251_(20.52%)	39,227,040,731_(29.52%)	27,356,046,576_(20.59%)	914,085_(0%)	0.4111	41.3146X	7004.56
16995-T	1956634230	1,952,755,126_(99.8%)	70,912,330_(3.62%)	976790162	975964964	1949768700	2986426	287345389108	381067866	407	39.6784	84,251,684,468_(29.33%)	59,031,773,856_(20.55%)	84,725,958,284_(29.5%)	59,212,596,407_(20.62%)	1,989,833_(0%)	0.4117	89.3113X	22387.2
17135-B	948184682	945,018,290_(99.67%)	33,657,296_(3.55%)	473209041	471809249	942405220	2613070	139271231328	119574031	374	37.8783	41,149,076,799_(29.56%)	28,301,931,983_(20.33%)	41,296,899,162_(29.66%)	28,465,768,417_(20.45%)	1,279,828_(0%)	0.4078	43.2876X	2565.96
17135-T	2355758064	2,329,879,465_(98.9%)	81,244,673_(3.45%)	1165119033	1164760432	2306327546	23551919	337430392614	281446335	404	39.8624	100,273,463,953_(29.73%)	67,732,777,853_(20.08%)	101,050,350,347_(29.96%)	68,219,581,760_(20.23%)	3,024,056_(0%)	0.4031	104.8785X	14752.1
17212-B	927558113	923,610,156_(99.57%)	32,968,747_(3.55%)	463028402	460581754	920250385	3359771	135945015094	109882561	405	39.0664	40,071,173,776_(29.49%)	27,720,876,869_(20.4%)	40,229,472,315_(29.6%)	27,867,393,893_(20.51%)	1,248,391_(0%)	0.4091	42.2538X	4712.51
17212-T	1530292321	1,523,395,057_(99.55%)	50,264,370_(3.28%)	763517870	759877187	1518006372	5388685	224359153043	172239591	405	39.3139	66,549,955,221_(29.67%)	45,455,402,012_(20.27%)	66,731,754,103_(29.75%)	45,538,181,044_(20.3%)	2,001,156_(0%)	0.4057	69.7342X	31504.1
17392-B	958010399	956,153,909_(99.81%)	36,419,787_(3.8%)	478103790	478050119	954428037	1725872	140964873511	129050339	419	39.9592	40,815,596,057_(28.97%)	29,470,607,628_(20.92%)	41,104,220,505_(29.17%)	29,510,445,259_(20.94%)	1,314,531_(0%)	0.4186	43.814X	10208.6
17392-T	1465540276	1,463,218,148_(99.84%)	54,705,695_(3.73%)	731818577	731399571	1461161848	2056300	215902113186	182099072	421	40.2792	62,715,661,393_(29.06%)	44,926,145,897_(20.82%)	63,164,218,410_(29.27%)	44,997,037,953_(20.85%)	2,029,873_(0%)	0.4167	67.1056X	13437.9
17827-B	929021440	927,559,146_(99.84%)	33,039,830_(3.56%)	463980693	463578453	926407611	1151535	136846765611	136931268	412	38.8591	40,229,996,615_(29.41%)	27,996,711,161_(20.47%)	40,468,975,819_(29.58%)	28,094,695,496_(20.54%)	1,031,119_(0%)	0.4101	42.534X	4339.62
17827-T	1715811321	1,712,548,230_(99.81%)	61,403,314_(3.58%)	856794104	855754126	1710175463	2372767	252657496817	257329728	412	39.4365	74,178,896,755_(29.37%)	51,781,098,524_(20.5%)	74,631,804,292_(29.55%)	51,959,882,703_(20.57%)	1,896,293_(0%)	0.4108	78.5298X	11958.7
18210-B	937801186	936,218,613_(99.83%)	33,498,044_(3.57%)	468379196	467839417	934961639	1256974	138160363910	134735429	431	38.6555	40,617,725,914_(29.41%)	28,264,570,474_(20.47%)	40,794,454,160_(29.54%)	28,427,501,242_(20.58%)	1,045,467_(0%)	0.4105	42.9423X	3514.02
18210-T	2022216989	2,018,261,070_(99.8%)	72,544,384_(3.59%)	1009730965	1008530105	2015483089	2777981	297906479500	296880468	433	39.2256	87,521,811,826_(29.39%)	61,016,759,147_(20.49%)	87,887,250,544_(29.51%)	61,360,391,512_(20.61%)	2,248,037_(0%)	0.411	92.5938X	10214.7
5060-1034766-B	1020946859	1,008,555,409_(98.79%)	36,212,536_(3.55%)	506120893	502434516	1004259162	4296247	147803205870	103971750	465	36.7951	43,321,248,574_(29.33%)	30,321,767,994_(20.53%)	43,545,748,623_(29.48%)	30,537,403,221_(20.67%)	14,603,181_(0.01%)	0.412	45.9395X	2116.98
5060-1034766-T	1759858257	1,654,892,115_(94.04%)	59,017,142_(3.35%)	831142792	823749323	1647007705	7884410	241291914971	312721862	370	36.6564	70,747,281,267_(29.34%)	49,463,914,499_(20.51%)	71,092,996,193_(29.48%)	49,851,560,630_(20.67%)	38,433,445_(0.02%)	0.4118	74.9972X	9554.35
5287-1079625-B	931192052	916,703,816_(98.44%)	31,849,456_(3.42%)	460136329	456567487	912708308	3995508	134794162984	136946716	431	37.2813	39,737,319,071_(29.5%)	27,402,256,153_(20.34%)	39,930,224,080_(29.64%)	27,649,565,641_(20.52%)	16,178,515_(0.01%)	0.4086	41.8961X	2553.96
5287-1079625-T	1852593332	1,799,197,553_(97.12%)	64,080,570_(3.46%)	906372546	892825007	1784927232	14270321	261284561132	338773527	443	36.9292	76,396,576,283_(29.26%)	53,725,768,484_(20.57%)	76,738,404,064_(29.39%)	54,271,029,825_(20.78%)	49,716,435_(0.02%)	0.4136	81.2112X	15667.9
5545-1079775-B	823134063	801,235,889_(97.34%)	28,127,648_(3.42%)	402147483	399088406	797939262	3296627	116753236779	101311217	398	36.9921	34,492,987,991_(29.56%)	23,629,728,421_(20.25%)	34,690,579,885_(29.73%)	23,866,459,648_(20.45%)	26,676,933_(0.02%)	0.4071	36.2887X	2372.09
5545-1079775-T	1579601243	1,558,273,249_(98.65%)	55,275,524_(3.5%)	781174876	777098373	1553291425	4981824	228808865331	325441404	479	37.2461	67,166,579,475_(29.38%)	46,718,517,690_(20.43%)	67,496,361,908_(29.52%)	47,251,580,872_(20.67%)	83,847,905_(0.04%)	0.411	71.1173X	30858.6
5656-1034950-B	1037557232	1,016,413,286_(97.96%)	37,164,390_(3.58%)	510531080	505882206	1011291861	5121425	147935472686	124961024	437	37.0841	43,230,556,692_(29.25%)	30,446,519,153_(20.6%)	43,402,546,759_(29.36%)	30,733,933,519_(20.79%)	60,446,619_(0.04%)	0.4139	45.9806X	5113.98
5656-1034950-T	1971393136	1,916,234,302_(97.2%)	69,573,017_(3.53%)	962505539	953728763	1906657518	9576784	280309057498	207868345	454	37.2694	82,246,701,442_(29.36%)	57,356,208,900_(20.47%)	82,576,314,929_(29.48%)	57,964,599,616_(20.69%)	43,518,423_(0.02%)	0.4116	87.1243X	24055
5684-1079906-B	1890936164	1,799,584,038_(95.17%)	62,662,284_(3.31%)	905565778	894018260	1786679250	12904788	261921537773	495188551	443	36.9914	76,949,372,914_(29.4%)	53,496,393,453_(20.44%)	77,292,847,412_(29.53%)	54,027,983,227_(20.64%)	47,580,764_(0.02%)	0.4108	81.4092X	7039.5
5684-1079906-T	1681406559	1,607,934,538_(95.63%)	56,994,861_(3.39%)	808445611	799488927	1598169265	9765273	233068924875	246249908	427	36.9223	68,056,327,753_(29.22%)	47,935,490,325_(20.58%)	68,441,765,732_(29.38%)	48,503,238,682_(20.82%)	31,418,557_(0.01%)	0.414	72.4413X	13949.1
5902-1035059-B	955664777	855,681,968_(89.54%)	31,512,281_(3.3%)	430469552	425212416	848841470	6840498	124741492132	124831844	387	37.3529	36,572,039,190_(29.33%)	25,540,936,987_(20.49%)	36,804,314,760_(29.52%)	25,758,920,011_(20.66%)	14,049,087_(0.01%)	0.4115	38.7715X	5869.49
5902-1035059-T	1892558689	1,655,359,600_(87.47%)	61,163,387_(3.23%)	831247989	824111611	1647139754	8219846	240603912368	358536304	433	37.2414	70,376,431,749_(29.27%)	49,445,602,037_(20.56%)	70,790,362,100_(29.44%)	49,862,334,383_(20.73%)	30,618,781_(0.01%)	0.413	74.7833X	17779.5
5958-1040497-B	955030467	937,332,060_(98.15%)	32,811,070_(3.44%)	470559269	466772791	933144452	4187608	137719803223	168634355	434	37.4469	40,547,590,211_(29.46%)	28,049,046,614_(20.38%)	40,755,063,794_(29.61%)	28,292,281,316_(20.55%)	14,114,828_(0.01%)	0.4093	42.8054X	3367
5958-1040497-T	1607283565	1,547,542,699_(96.28%)	55,031,715_(3.42%)	776104376	771438323	1542005010	5537689	227010546896	186421189	398	37.2972	66,384,091,695_(29.26%)	46,487,694,128_(20.49%)	66,717,221,008_(29.41%)	47,251,567,441_(20.83%)	69,795,612_(0.03%)	0.4132	70.5583X	19811
6068-B	1289553740	1,286,660,630_(99.78%)	47,229,719_(3.66%)	642980517	643680113	1284066573	2594057	189821532338	294355838	442	38.4207	55,464,410,024_(29.23%)	39,178,320,703_(20.65%)	55,838,118,475_(29.43%)	39,252,897,193_(20.69%)	2,548,224_(0%)	0.4134	58.9994X	11449.7
6068-T	1778874327	1,774,139,390_(99.73%)	64,819,464_(3.64%)	886685600	887453790	1769917281	4222109	261523287099	371982847	418	38.5417	76,467,609,153_(29.25%)	53,932,425,666_(20.63%)	76,987,236,716_(29.45%)	54,014,817,510_(20.66%)	3,566,376_(0%)	0.413	81.2854X	26234.3
6359-1050886-B	913079157	880,246,701_(96.4%)	30,870,150_(3.38%)	442563705	437682996	875089077	5157624	128350348744	110600390	424	37.0354	37,670,001,185_(29.36%)	26,268,696,692_(20.48%)	37,823,753,574_(29.48%)	26,527,740,205_(20.68%)	10,317,020_(0.01%)	0.4115	39.8932X	4340.54
6359-1050886-T	1949084611	1,733,844,392_(88.96%)	60,246,339_(3.09%)	870003189	863841203	1724685939	9158453	254910135236	465326883	402	37.657	74,737,589,039_(29.34%)	52,267,883,223_(20.52%)	75,007,266,634_(29.44%)	52,757,248,203_(20.71%)	31,209,924_(0.01%)	0.4122	79.2299X	18613.8
BRA04-B	1274923759	1,266,874,517_(99.37%)	49,035,668_(3.85%)	633095202	633779315	1259198969	7675548	184557986749	224258760	450	39.1603	53,498,785,075_(29%)	38,510,616,463_(20.88%)	53,825,536,757_(29.18%)	38,636,460,209_(20.94%)	3,383,973_(0%)	0.4182	57.3634X	8448.53
BRA04-T	2159848504	2,146,653,769_(99.39%)	79,313,319_(3.67%)	1069797004	1076856765	2134852191	11801578	312566218553	387806247	408	40.5164	91,249,639,137_(29.21%)	64,576,776,857_(20.67%)	91,804,891,518_(29.38%)	64,790,032,566_(20.74%)	5,829,932_(0%)	0.4141	97.1503X	18840
BRA05-B	1054379669	1,051,391,771_(99.72%)	42,582,492_(4.04%)	525948932	525442839	1048657603	2734168	154317129875	184507145	371	39.9747	43,990,076,716_(28.52%)	32,940,221,337_(21.36%)	44,254,203,209_(28.69%)	33,053,607,541_(21.43%)	3,223,597_(0%)	0.4279	47.9641X	5217.22
BRA05-T	1425469203	1,418,906,615_(99.54%)	52,851,672_(3.71%)	709708628	709197987	1412971247	5935368	208181702519	269757183	459	40.7526	60,444,175,536_(29.05%)	43,350,674,589_(20.83%)	60,772,048,688_(29.21%)	43,518,872,738_(20.91%)	4,328,631_(0%)	0.4175	64.706X	16459.9
BRA07-B	1132679716	1,128,884,128_(99.66%)	45,932,010_(4.06%)	563948481	564935647	1125400895	3483233	165485979979	177168652	392	39.4498	47,303,857,747_(28.6%)	35,166,721,283_(21.26%)	47,644,434,016_(28.8%)	35,291,542,970_(21.34%)	1,129,709_(0%)	0.426	51.4355X	6898.38
BRA07-T	2309439035	2,303,942,249_(99.76%)	86,508,595_(3.75%)	1151958989	1151983260	2299713202	4229047	338907474644	366770485	381	40.383	98,251,497,815_(29%)	70,755,954,630_(20.89%)	98,732,050,235_(29.14%)	71,023,107,458_(20.97%)	2,328,434_(0%)	0.4185	105.3376X	21657.2
BRA08-B	816749748	814,628,391_(99.74%)	31,755,285_(3.89%)	407454184	407174207	812698079	1930312	119569445016	109659422	387	38.9029	34,533,399,679_(28.89%)	25,062,081,332_(20.97%)	34,817,533,877_(29.13%)	25,101,133,764_(21%)	2,335,657_(0%)	0.4197	37.164X	5496.87
BRA08-T	1703964623	1,697,901,651_(99.64%)	63,373,367_(3.72%)	849550462	848351189	1693138385	4763266	249654882086	231615543	430	40.8906	72,818,307,427_(29.18%)	51,652,473,953_(20.7%)	73,293,609,923_(29.37%)	51,777,661,620_(20.75%)	4,927,319_(0%)	0.4145	77.5965X	12678.3
BRA10-B	1132077332	1,126,925,177_(99.54%)	44,087,612_(3.89%)	563544497	563380680	1122017373	4907804	164616262518	174913792	398	39.0533	47,641,438,865_(28.95%)	34,430,689,787_(20.93%)	47,949,863,627_(29.14%)	34,514,397,158_(20.98%)	1,306,682_(0%)	0.419	51.1652X	10200.2
BRA10-T	2261264953	2,248,767,082_(99.45%)	84,856,736_(3.75%)	1123072891	1125694191	2237912382	10854700	328239240451	352643663	394	40.4265	95,449,772,749_(29.09%)	68,214,277,452_(20.79%)	96,003,293,451_(29.26%)	68,420,358,000_(20.85%)	2,634,692_(0%)	0.4165	102.0217X	27875.5
BRA13-B	972292785	968,997,493_(99.66%)	38,000,055_(3.91%)	484603792	484393701	965948731	3048762	142182763037	133460510	417	40.64	40,994,788,317_(28.85%)	29,884,500,669_(21.03%)	41,249,189,076_(29.03%)	29,984,256,874_(21.1%)	865,011_(0%)	0.4213	44.1925X	9497.76
BRA13-T	2578582579	2,571,331,466_(99.72%)	92,034,244_(3.57%)	1286844315	1284487151	2565314208	6017258	378913819908	391259445	436	41.3474	110,559,984,398_(29.19%)	78,411,922,774_(20.7%)	111,074,160,134_(29.33%)	78,694,288,220_(20.78%)	2,309,655_(0%)	0.4148	117.7721X	35751.8
BRA15-B	923597811	921,285,892_(99.75%)	36,930,422_(4%)	460811176	460474716	919147468	2138424	133117028499	140678147	334	39.7002	37,896,027,892_(28.49%)	28,481,899,439_(21.41%)	38,074,349,706_(28.62%)	28,578,998,427_(21.48%)	1,055,203_(0%)	0.4289	41.3748X	1996.44
BRA15-T	2104156356	2,097,167,885_(99.67%)	77,496,866_(3.68%)	1048940299	1048227586	2091114657	6053228	307758692517	306358580	355	41.5135	89,344,300,505_(29.04%)	64,161,669,062_(20.86%)	89,707,379,394_(29.16%)	64,404,219,014_(20.94%)	2,431,825_(0%)	0.4179	95.656X	24777.6
KAL0004-B	1200117178	1,195,226,898_(99.59%)	44,704,124_(3.72%)	597393167	597833731	1190812166	4414732	175271140968	216848943	469	39.3642	50,983,700,198_(29.1%)	36,374,816,852_(20.76%)	51,280,760,520_(29.27%)	36,543,995,945_(20.86%)	3,251,433_(0%)	0.4162	54.4769X	8162.16
KAL0004-T	2372047559	2,363,373,977_(99.63%)	88,513,460_(3.73%)	1181298748	1182075229	2355908222	7465755	346889203184	431610122	402	40.1094	100,118,273,761_(28.88%)	72,971,997,514_(21.05%)	100,663,588,849_(29.03%)	72,956,970,182_(21.04%)	6,535,967_(0%)	0.4209	107.8184X	85119.8
KAL0013-B	914782551	912,582,082_(99.76%)	33,759,738_(3.69%)	456123144	456458938	910593971	1988111	134146105853	154455201	426	39.857	39,179,827,662_(29.22%)	27,685,819,307_(20.65%)	39,382,183,497_(29.37%)	27,829,032,487_(20.76%)	2,195,536_(0%)	0.4141	41.6946X	5429.22
KAL0013-T	2516932004	2,509,306,184_(99.7%)	93,338,334_(3.71%)	1255192721	1254113463	2502720599	6585585	369738640651	428433422	446	40.4607	106,786,298,479_(28.9%)	77,903,006,148_(21.08%)	107,083,074,361_(28.98%)	77,789,075,088_(21.05%)	6,841,782_(0%)	0.4213	114.9204X	150303
KAL0022-B	1097185809	1,093,710,838_(99.68%)	40,456,502_(3.69%)	547446324	546264514	1090492123	3218715	160909246494	210490306	462	39.5275	46,751,121,567_(29.07%)	33,432,399,012_(20.79%)	47,110,109,467_(29.29%)	33,535,102,094_(20.85%)	3,343,055_(0%)	0.4164	50.013X	5246.02
KAL0022-T	2389994298	2,380,850,234_(99.62%)	89,809,462_(3.76%)	1192280877	1188569357	2372584151	8266083	350184653602	463627191	459	40.0021	101,372,997,724_(28.96%)	73,270,808,577_(20.93%)	102,043,378,552_(29.15%)	73,325,999,707_(20.95%)	7,286,930_(0%)	0.4188	108.8427X	53408
KAL0043-B	911833155	909,691,254_(99.77%)	33,512,631_(3.68%)	454452537	455238717	907727049	1964205	133397999593	187742186	423	39.9387	39,020,376,080_(29.27%)	27,456,891,162_(20.59%)	39,273,080,724_(29.46%)	27,579,482,531_(20.69%)	2,766,834_(0%)	0.4128	41.4621X	5249.09
KAL0043-T	2196633540	2,190,107,961_(99.7%)	83,589,692_(3.81%)	1095099132	1095008829	2184229354	5878607	321760356354	459780546	461	40.3931	93,020,452,648_(28.92%)	67,498,101,957_(20.99%)	93,559,841,862_(29.09%)	67,515,685,872_(20.99%)	6,667,397_(0%)	0.4198	100.008X	57568.7
KAL0054-B	832285294	830,351,732_(99.77%)	31,808,207_(3.82%)	415312717	415039015	828817464	1534268	122283414621	132251858	419	39.6231	35,463,445,651_(29.02%)	25,489,257,472_(20.86%)	35,727,035,090_(29.23%)	25,539,651,076_(20.9%)	1,998,374_(0%)	0.4175	38.0075X	4246.62
KAL0054-T	2287560140	2,274,183,936_(99.42%)	88,023,265_(3.85%)	1137953489	1136230447	2268229052	5954884	334715494803	360869313	449	40.3987	96,813,123,496_(28.94%)	70,071,039,740_(20.95%)	97,464,048,119_(29.13%)	70,198,904,371_(20.98%)	5,465,159_(0%)	0.4193	104.0346X	18322.1
KAL0072-B	974087266	971,873,433_(99.77%)	36,532,939_(3.75%)	485951602	485921831	970072743	1800690	143184601910	149801685	443	39.7209	41,583,459,066_(29.06%)	29,762,008,268_(20.8%)	41,875,909,634_(29.26%)	29,893,532,116_(20.89%)	986,039_(0%)	0.4168	44.5039X	4034.33
KAL0072-T	2133207141	2,124,594,607_(99.6%)	82,148,450_(3.85%)	1062920544	1061674063	2117712786	6881821	311996439239	322193233	404	40.2971	90,084,123,331_(28.89%)	65,476,795,172_(21%)	90,681,330,980_(29.08%)	65,596,111,863_(21.04%)	2,128,295_(0%)	0.4203	96.9732X	27459.5
KAL0074-B	1022253535	1,020,430,513_(99.82%)	37,351,039_(3.65%)	510285517	510144996	1018915523	1514990	150275661147	167139698	401	39.2961	43,832,152,275_(29.18%)	31,088,074,748_(20.7%)	44,104,000,615_(29.36%)	31,173,783,621_(20.76%)	1,029,368_(0%)	0.4145	46.7079X	5465.91
KAL0074-T	1949818039	1,944,736,562_(99.74%)	69,393,205_(3.56%)	972281549	972455013	1941612849	3123713	286562446494	313987842	368	39.9548	83,492,615,775_(29.15%)	59,541,821,697_(20.79%)	83,866,405,588_(29.28%)	59,532,862,267_(20.78%)	1,998,907_(0%)	0.4157	89.0679X	50266.9
KAL0078-B	1004277308	1,001,506,877_(99.72%)	37,355,237_(3.72%)	501176908	500329969	999080114	2426763	147298351639	138960500	464	39.8017	42,959,534,192_(29.18%)	30,471,281,815_(20.7%)	43,221,392,803_(29.36%)	30,571,598,714_(20.77%)	2,871,999_(0%)	0.4146	45.7826X	8198.4
KAL0078-T	2182455339	2,172,917,138_(99.56%)	82,440,418_(3.78%)	1087678363	1085238775	2166852555	6064583	319574466094	303710915	461	40.5494	92,861,673,972_(29.07%)	66,534,383,911_(20.83%)	93,384,740,570_(29.24%)	66,635,016,725_(20.86%)	6,240,907_(0%)	0.4169	99.3286X	41225.3
KAL0091-B	930056454	927,636,433_(99.74%)	34,016,170_(3.66%)	464147398	463489035	925544229	2092204	136567585025	134003081	433	39.8953	39,926,406,016_(29.25%)	28,136,859,647_(20.61%)	40,126,577,901_(29.4%)	28,310,842,798_(20.74%)	2,656,670_(0%)	0.4135	42.4473X	3612.36
KAL0091-T	2025069746	2,018,038,196_(99.65%)	77,537,059_(3.83%)	1010379147	1007659049	2012242219	5795977	296896687890	291902457	443	40.5252	86,062,643,475_(29%)	61,981,198,168_(20.89%)	86,459,229,530_(29.14%)	62,250,219,125_(20.98%)	5,775,672_(0%)	0.4186	92.28X	24472.7
KAL0095-B	1231097617	1,226,200,398_(99.6%)	46,462,412_(3.77%)	613214376	612986022	1221767731	4432667	179980978793	199459392	449	40.1099	52,252,731,222_(29.05%)	37,432,385,170_(20.81%)	52,633,041,531_(29.26%)	37,576,261,414_(20.89%)	1,437,624_(0%)	0.417	55.9408X	4345.74
KAL0101-B	935354615	932,921,353_(99.74%)	35,204,369_(3.76%)	466804919	466116434	930927734	1993619	137016323461	139695133	407	40.8924	39,720,678,522_(29%)	28,567,469,808_(20.86%)	40,006,852,220_(29.21%)	28,650,095,955_(20.92%)	1,374,243_(0%)	0.4178	42.5867X	4930.1
KAL0101-T	1808391064	1,803,052,576_(99.7%)	71,238,308_(3.94%)	902536366	900516210	1798528369	4524207	264768978927	258495252	421	40.8332	75,950,080,961_(28.7%)	56,064,146,972_(21.19%)	76,423,976,380_(28.88%)	56,195,473,676_(21.24%)	2,610,920_(0%)	0.4242	82.2942X	20769.7
KAL0104-B	1123602012	1,120,523,856_(99.73%)	42,349,111_(3.77%)	560413019	560110837	1117831712	2692144	164676772719	159985301	424	40.3117	47,907,025,405_(29.1%)	34,169,409,002_(20.76%)	48,286,467,088_(29.34%)	34,239,059,474_(20.8%)	1,008,235_(0%)	0.4156	51.184X	6850.72
KAL0104-T	2318338724	2,311,013,418_(99.68%)	93,004,975_(4.01%)	1155963036	1155050382	2305012665	6000753	339463436815	328445722	455	40.8249	97,703,145,978_(28.79%)	71,579,673,343_(21.1%)	98,392,390,301_(29%)	71,632,630,000_(21.11%)	2,069,580_(0%)	0.4221	105.5104X	34860.9
KAL0106-B	1004006752	1,001,218,991_(99.72%)	38,444,083_(3.83%)	500818405	500400586	998732753	2486238	146848712368	141532481	424	40.3861	42,654,421,984_(29.06%)	30,553,398,002_(20.82%)	43,009,060,410_(29.3%)	30,549,620,456_(20.82%)	885,062_(0%)	0.4163	45.6428X	5062.27
KAL0106-T	1700185631	1,692,473,806_(99.55%)	67,275,504_(3.96%)	846754609	845719197	1686213576	6260230	247503247843	233588103	432	40.9139	71,579,975,660_(28.94%)	51,821,847,208_(20.95%)	72,202,159,756_(29.19%)	51,755,988,399_(20.92%)	1,504,823_(0%)	0.4187	76.9277X	11504
KAL0107-B	991182009	988,138,006_(99.69%)	37,212,627_(3.75%)	494343014	493794992	985383826	2754180	145120488494	145615166	435	40.0445	42,154,111,560_(29.06%)	30,172,351,509_(20.8%)	42,413,572,329_(29.24%)	30,311,601,497_(20.9%)	1,132,328_(0%)	0.417	45.1056X	4009.9
KAL0107-T	1833409925	1,827,459,853_(99.68%)	70,760,119_(3.86%)	914208392	913251461	1822246756	5213097	268425181278	269678611	432	40.7062	77,433,407,004_(28.86%)	56,428,458,293_(21.03%)	77,851,950,009_(29.02%)	56,587,782,893_(21.09%)	2,097,762_(0%)	0.4212	83.4306X	28779.1
KAL053-B	964481465	962,235,477_(99.77%)	35,785,692_(3.71%)	481675439	480560038	960152970	2082507	141489833558	151561694	427	38.8789	41,140,565,238_(29.09%)	29,400,637,629_(20.79%)	41,377,665,258_(29.26%)	29,499,792,988_(20.86%)	1,399,560_(0%)	0.4165	43.9772X	7436.39
KAL053-T	2056485537	2,050,422,775_(99.71%)	75,946,064_(3.69%)	1026316754	1024106021	2045361220	5061555	301803882737	320998672	400	39.3008	87,161,422,510_(28.89%)	63,536,631,009_(21.06%)	87,497,403,036_(29%)	63,476,407,527_(21.04%)	2,993,122_(0%)	0.421	93.8052X	86534.4
KAL070-B	1010897243	1,008,123,904_(99.73%)	38,298,844_(3.79%)	504395261	503728643	1005780540	2343364	148200363266	159090658	419	39.6583	42,996,691,657_(29.03%)	30,872,274,732_(20.84%)	43,342,420,629_(29.26%)	30,911,281,848_(20.87%)	2,428,464_(0%)	0.4171	46.0629X	4721.83
KAL070-T	2049418365	2,045,070,355_(99.79%)	75,567,914_(3.69%)	1023117829	1021952526	2041430812	3639543	301975565719	347588125	400	39.6945	87,356,725,852_(28.94%)	63,373,622,420_(20.99%)	87,768,963,298_(29.08%)	63,352,963,851_(20.99%)	2,406,700_(0%)	0.4198	93.8586X	46091.2
N0001-B	983948047	982,512,807_(99.85%)	35,172,607_(3.57%)	491234528	491278279	981359861	1152946	144617533671	170464869	362	40.1705	42,340,523,181_(29.29%)	29,752,788,999_(20.58%)	42,565,469,734_(29.45%)	29,888,882,835_(20.68%)	1,749,498_(0%)	0.4126	44.9493X	3126.53
N0001-T	2008760370	2,005,248,116_(99.83%)	70,273,630_(3.5%)	1002848348	1002399768	2002660836	2587280	295626056905	358657917	384	40.6449	86,631,552,449_(29.32%)	60,752,487,877_(20.56%)	87,104,285,688_(29.48%)	60,993,396,061_(20.64%)	3,566,823_(0%)	0.412	91.885X	13235.7
N0002-B	1023703891	1,022,137,712_(99.85%)	36,646,487_(3.58%)	511141761	510995951	1020873296	1264416	150643853306	172273962	399	39.4544	44,140,084,206_(29.31%)	30,965,621,635_(20.57%)	44,392,823,327_(29.48%)	31,073,860,963_(20.64%)	1,803,669_(0%)	0.412	46.8224X	5676.66
N0002-T	1553254252	1,550,478,851_(99.82%)	55,965,924_(3.6%)	775425061	775053790	1548399022	2079829	228299443085	260094111	413	39.8303	66,967,463,000_(29.35%)	46,871,259,185_(20.54%)	67,359,551,444_(29.52%)	46,988,035,038_(20.59%)	2,733,562_(0%)	0.4113	70.9589X	24876.7
N0007-B	840541981	839,280,216_(99.85%)	30,338,868_(3.61%)	419743064	419537152	838239994	1040222	123709017627	144527420	415	39.9504	36,160,589,326_(29.24%)	25,523,826,395_(20.64%)	36,366,606,926_(29.41%)	25,597,234,700_(20.7%)	1,481,130_(0%)	0.4134	38.4506X	3292.75
N0007-T	1724461396	1,720,956,043_(99.8%)	61,697,732_(3.58%)	860603060	860352983	1718645437	2310606	253255417511	296123762	410	40.432	74,377,168,838_(29.38%)	51,876,184,361_(20.49%)	74,862,816,763_(29.58%)	52,008,101,779_(20.55%)	3,045,883_(0%)	0.4104	78.7156X	15331.5
N0010-B	968865706	967,337,405_(99.84%)	35,241,882_(3.64%)	483757815	483579590	966099948	1237457	142421717047	164909700	403	39.7202	41,689,330,860_(29.29%)	29,320,603,766_(20.6%)	41,913,540,006_(29.44%)	29,426,097,712_(20.67%)	1,712,394_(0%)	0.4127	44.2668X	5594.18
N0010-T	1783372036	1,780,207,146_(99.82%)	63,821,226_(3.58%)	890348362	889858784	1777845157	2361989	262114843068	307302241	408	39.9533	76,886,083,982_(29.35%)	53,790,676,038_(20.53%)	77,315,624,109_(29.51%)	53,988,579,520_(20.61%)	3,146,297_(0%)	0.4114	81.4693X	12689.1
N0015-B	1134535433	1,132,785,054_(99.85%)	41,285,938_(3.64%)	566572430	566212624	1131359051	1426003	166933693185	202089848	386	38.7413	48,863,942,192_(29.29%)	34,354,617,028_(20.59%)	49,150,440,310_(29.46%)	34,484,905,521_(20.67%)	2,025,128_(0%)	0.4126	51.8855X	5933.25
N0015-T	2321914301	2,317,828,342_(99.82%)	83,185,578_(3.58%)	1159291549	1158536793	2314700471	3127871	341578600749	427280349	385	39.0218	99,921,253,336_(29.27%)	70,444,142,693_(20.63%)	100,387,792,209_(29.4%)	70,663,162,871_(20.7%)	4,142,402_(0%)	0.4133	106.1678X	60280.3
N0031-B	1029692381	1,027,064,903_(99.74%)	38,181,789_(3.71%)	514056150	513008753	1024771657	2293246	150525054476	179355112	384	38.4012	43,993,625,105_(29.24%)	31,043,160,578_(20.63%)	44,278,433,080_(29.43%)	31,130,253,544_(20.69%)	847,991_(0%)	0.4133	46.7855X	5090.42
N0048-B	1196443866	1,184,035,361_(98.96%)	43,407,654_(3.63%)	587823346	596212015	1172005517	12029844	172200586570	218498209	363	39.7331	50,240,573,449_(29.19%)	35,600,468,322_(20.68%)	50,567,082,722_(29.38%)	35,706,220,235_(20.75%)	967,197_(0%)	0.4143	53.5225X	6775.7
N0048-T	2073214080	2,060,468,554_(99.39%)	75,677,766_(3.65%)	1027787146	1032681408	2048614763	11853791	301214273288	381109754	375	40.3858	87,832,318,022_(29.17%)	62,367,706,042_(20.72%)	88,374,410,183_(29.35%)	62,488,117,313_(20.76%)	1,694,567_(0%)	0.4147	93.6219X	22531.6
N0053-B	752807623	750,894,028_(99.75%)	27,809,473_(3.69%)	375660893	375233135	749155904	1738124	110390883025	137057726	383	39.5185	32,076,729,200_(29.07%)	22,952,168,341_(20.8%)	32,294,920,477_(29.27%)	23,011,198,518_(20.86%)	619,749_(0%)	0.4166	34.3112X	5523.28
N0053-T	1793542535	1,785,974,808_(99.58%)	65,022,681_(3.63%)	892164517	893810291	1779378264	6596544	261508871967	337437504	334	40.2166	76,181,096,230_(29.15%)	54,244,869,450_(20.75%)	76,644,006,444_(29.32%)	54,304,350,316_(20.78%)	1,472,922_(0%)	0.4153	81.2809X	38197.8
N0055-B	1145229066	1,139,922,122_(99.54%)	42,214,590_(3.69%)	568815137	571106985	1135105495	4816627	166705140276	212107639	335	40.0897	48,646,931,178_(29.2%)	34,477,157,938_(20.69%)	48,977,104,867_(29.39%)	34,517,894,255_(20.72%)	958,223_(0%)	0.4141	51.8145X	7432.38
N0056-B	914290688	911,295,179_(99.67%)	34,901,766_(3.82%)	455651509	455643670	908547812	2747367	133528215990	169590147	355	39.6559	38,841,182,428_(29.1%)	27,699,995,203_(20.76%)	39,099,061,747_(29.3%)	27,816,552,489_(20.84%)	763,291_(0%)	0.416	41.5026X	5581.44
N0056-T	1946202026	1,941,146,578_(99.74%)	69,203,641_(3.56%)	970819679	970326899	1937210398	3936180	284994601222	325293216	355	40.29	83,509,134,354_(29.32%)	58,802,298,791_(20.64%)	83,906,772,087_(29.46%)	58,633,266,535_(20.58%)	1,639,569_(0%)	0.4123	88.5806X	88435.9
N0059-B	831224411	829,411,333_(99.78%)	30,361,514_(3.65%)	414921282	414490051	827761778	1649555	121948391158	135658231	374	39.6343	35,519,575,543_(29.14%)	25,250,413,028_(20.72%)	35,743,839,279_(29.33%)	25,374,220,657_(20.82%)	693,378_(0%)	0.4153	37.9034X	3629.52
N0059-T	1652244897	1,647,922,335_(99.74%)	55,384,442_(3.35%)	824390495	823531840	1644329594	3592741	241947332315	263776955	398	40.3483	71,241,580,184_(29.46%)	49,519,081,228_(20.48%)	71,554,407,423_(29.59%)	49,526,031,839_(20.48%)	1,355,566_(0%)	0.4095	75.2009X	51510.1
N0061-B	664486983	663,259,304_(99.82%)	24,495,281_(3.69%)	331787173	331472131	662152877	1106427	97259547231	104685897	392	39.6239	28,484,845,935_(29.3%)	20,006,381,197_(20.58%)	28,624,787,269_(29.45%)	20,093,512,733_(20.67%)	540,935_(0%)	0.4125	30.2297X	3735.31
N0061-T	1429374112	1,423,813,135_(99.61%)	51,172,357_(3.58%)	712191161	711621974	1419208159	4604976	208222758101	228703615	364	40.3971	61,079,144,914_(29.35%)	42,804,963,814_(20.57%)	61,362,859,768_(29.48%)	42,873,331,812_(20.6%)	1,158,908_(0%)	0.4117	64.7188X	27272.2
N0067-B	763986911	762,371,886_(99.79%)	27,923,306_(3.65%)	381336484	381035402	760989214	1382672	112158151050	121912090	395	39.4153	32,777,017,589_(29.24%)	23,136,074,786_(20.64%)	32,974,248,830_(29.41%)	23,214,700,473_(20.71%)	624,107_(0%)	0.4135	34.8604X	4460.57
N0067-T	1759512636	1,749,301,758_(99.42%)	63,704,591_(3.62%)	874356627	874945131	1741588900	7712858	255828809778	278488775	377	40.1457	74,715,800,357_(29.22%)	52,891,885,839_(20.68%)	75,141,923,637_(29.39%)	52,960,014,055_(20.71%)	1,447,018_(0%)	0.414	79.5155X	40714.3
N0073-B	854298604	852,762,088_(99.82%)	32,013,062_(3.75%)	426650817	426111271	851329098	1432990	125482074738	146199697	399	38.2035	36,510,884,639_(29.11%)	26,038,215,079_(20.76%)	36,746,215,124_(29.3%)	26,120,581,705_(20.83%)	527,711_(0%)	0.4159	39.0017X	4075.12
N0073-T	2137238221	2,123,683,226_(99.37%)	75,280,487_(3.52%)	1062486256	1061196970	2111151635	12531591	309314227507	362042487	365	40.3953	90,645,254,318_(29.32%)	63,778,251,499_(20.63%)	91,165,776,313_(29.49%)	63,570,561,403_(20.56%)	1,355,645_(0%)	0.4119	96.1395X	150344
N0077-B	1025894066	1,023,453,633_(99.76%)	38,393,643_(3.74%)	512262712	511190921	1021229428	2224205	150498229550	181704414	405	39.8252	43,744,280,919_(29.08%)	31,284,373,187_(20.8%)	44,020,117,902_(29.26%)	31,373,756,594_(20.86%)	656,526_(0%)	0.4165	46.7771X	7955.17
N0077-T	1797004754	1,789,426,012_(99.58%)	64,480,539_(3.59%)	896007621	893418391	1783708379	5717633	262757198963	307887053	413	40.5924	76,636,911,327_(29.18%)	54,403,371,119_(20.71%)	77,079,892,219_(29.35%)	54,512,101,697_(20.76%)	1,132,807_(0%)	0.4147	81.6689X	29424.1
N0078-B	967138300	964,974,269_(99.78%)	35,757,587_(3.7%)	482998631	481975638	962987676	1986593	141755537672	165408603	393	39.8954	41,196,760,979_(29.08%)	29,489,636,001_(20.81%)	41,447,519,107_(29.25%)	29,548,783,092_(20.86%)	618,178_(0%)	0.4167	44.0598X	6394.92
N0078-T	1956738482	1,949,634,197_(99.64%)	67,760,614_(3.46%)	975594944	974039253	1945054785	4579412	287365520971	333556632	386	40.4641	83,714,527,399_(29.14%)	59,758,136,047_(20.8%)	84,064,275,407_(29.27%)	59,705,924,303_(20.79%)	1,826,587_(0%)	0.4159	89.3175X	64100.2
N0081-B	704300033	702,490,826_(99.74%)	26,189,327_(3.72%)	351595197	350895629	700910824	1580002	103258546427	120342323	416	40.0424	30,008,232,960_(29.08%)	21,460,180,270_(20.79%)	30,215,752,407_(29.28%)	21,522,820,803_(20.85%)	447,648_(0%)	0.4165	32.0943X	4377.99
N0081-T	636826878	629,501,171_(98.85%)	22,338,767_(3.51%)	315580686	313920485	623788007	5713164	91655127388	101586313	468	40.3096	26,846,448,057_(29.31%)	18,878,025,086_(20.61%)	27,055,230,143_(29.53%)	18,830,147,212_(20.55%)	388,375_(0%)	0.4116	28.4878X	32570.3
N0084-B	952748180	950,470,653_(99.76%)	37,064,616_(3.89%)	475822787	474647866	948388931	2081722	139528687705	167538008	389	39.8494	40,527,727,581_(29.06%)	29,024,375,652_(20.81%)	40,804,274,441_(29.26%)	29,096,644,573_(20.86%)	608,620_(0%)	0.4168	43.3676X	9854.11
N0084-T	2360170274	2,355,649,995_(99.81%)	88,330,713_(3.74%)	1177899792	1177750203	2352125280	3524715	344544664800	463174739	335	40.9704	100,436,556,308_(29.16%)	71,350,556,225_(20.72%)	101,014,725,402_(29.33%)	71,587,386,650_(20.79%)	1,530,200_(0%)	0.415	107.0897X	37238
N0085-B	1158467750	1,156,013,700_(99.79%)	42,822,027_(3.7%)	578306261	577707439	1153814732	2198968	169536313771	222104403	368	40.5093	49,597,769,679_(29.27%)	34,958,004,440_(20.63%)	49,884,243,209_(29.44%)	35,007,551,162_(20.66%)	744,923_(0%)	0.4129	52.6944X	6616.32
N0085-T	1985587727	1,980,819,324_(99.76%)	68,404,473_(3.45%)	990568227	990251097	1976874412	3944912	289816596034	365936397	328	41.1394	85,448,629,273_(29.5%)	59,205,168,540_(20.44%)	85,765,656,790_(29.61%)	59,260,952,699_(20.46%)	1,272,815_(0%)	0.409	90.0794X	78383.2
N0087-B	1191356437	1,189,111,376_(99.81%)	44,216,793_(3.71%)	594852016	594259360	1187136800	1974576	174766401498	224995303	390	39.9397	51,050,622,671_(29.22%)	36,096,583,803_(20.66%)	51,382,103,655_(29.41%)	36,154,097,180_(20.7%)	759,865_(0%)	0.4136	54.32X	7106.34
N0087-T	1835029193	1,828,511,497_(99.64%)	60,632,942_(3.3%)	914618631	913892866	1822691264	5820233	268732812040	339586426	399	40.5407	79,123,383,454_(29.45%)	55,011,073,302_(20.48%)	79,491,242,650_(29.59%)	55,008,629,601_(20.48%)	1,155,101_(0%)	0.4096	83.5262X	74220.5
N0088-B	1188188312	1,185,722,737_(99.79%)	44,909,349_(3.78%)	592934744	592787993	1183719964	2002773	173942244594	224816601	360	40.1783	50,716,061,321_(29.17%)	35,984,861,501_(20.7%)	51,054,141,431_(29.37%)	36,099,231,241_(20.76%)	765,096_(0%)	0.4146	54.0639X	3980.25
N0088-T	1956911636	1,950,366,822_(99.67%)	64,041,864_(3.27%)	975168320	975198502	1945641106	4725716	287210908131	366555039	377	40.9184	84,554,199,149_(29.45%)	58,868,465,884_(20.5%)	84,977,311,451_(29.6%)	58,693,431,831_(20.44%)	1,257,856_(0%)	0.4095	89.2695X	80264.9
SMU019-B	944834692	942,547,132_(99.76%)	34,590,291_(3.66%)	471455920	471091212	940446882	2100250	138632726529	152642876	467	39.8779	40,497,905,733_(29.23%)	28,610,031,940_(20.65%)	40,754,230,595_(29.41%)	28,698,767,348_(20.71%)	2,525,710_(0%)	0.4136	43.0891X	7870.14
SMU019-T	1785315093	1,781,840,261_(99.81%)	61,633,597_(3.45%)	890760607	891079654	1779296823	2543438	262566268294	294703185	402	40.4313	76,902,841,844_(29.3%)	54,318,719,174_(20.7%)	77,154,268,381_(29.4%)	54,067,714,101_(20.6%)	4,944,725_(0%)	0.413	81.6096X	124360
SMU027-B	834390552	832,633,585_(99.79%)	30,742,340_(3.68%)	416406374	416227211	831036921	1596664	122548078537	138882327	448	39.7454	35,707,727,693_(29.15%)	25,381,537,390_(20.72%)	35,973,502,412_(29.37%)	25,421,420,602_(20.75%)	2,256,890_(0%)	0.4148	38.0898X	5470.12
SMU027-T	1909814988	1,904,573,959_(99.73%)	68,325,190_(3.58%)	952131391	952442568	1900449505	4124454	279919151999	321789224	455	40.3498	81,893,085,732_(29.27%)	57,798,415,512_(20.66%)	82,336,008,698_(29.43%)	57,755,385,410_(20.64%)	5,181,169_(0%)	0.413	87.0031X	74601.4
SMU029-B	921643876	919,583,871_(99.78%)	34,915,521_(3.79%)	459873201	459710670	917692691	1891180	135013229030	148682413	389	39.5113	39,280,026,562_(29.11%)	28,038,307,953_(20.78%)	39,594,298,294_(29.34%)	28,023,399,360_(20.77%)	2,521,156_(0%)	0.4155	41.9642X	6834.07
SMU029-T	2032982719	2,028,031,569_(99.76%)	75,388,052_(3.71%)	1014153480	1013878089	2023820611	4210958	297780447766	343412501	430	40.3015	86,882,634,046_(29.19%)	61,698,714,999_(20.73%)	87,495,004,965_(29.4%)	61,535,586,496_(20.68%)	5,532,312_(0%)	0.4141	92.5547X	64800.8
SMU030-B	838548811	836,505,887_(99.76%)	30,774,384_(3.67%)	418506439	417999448	834620470	1885417	123073451750	145880506	440	38.1395	35,933,228,809_(29.21%)	25,426,632,566_(20.67%)	36,159,295,258_(29.4%)	25,490,245,096_(20.72%)	2,297,909_(0%)	0.4139	38.2531X	8296.14
SMU030-T	1960383220	1,956,066,710_(99.78%)	68,362,525_(3.49%)	978607814	977458896	1952473582	3593128	288017840208	346910575	410	38.5981	84,336,195,236_(29.3%)	59,429,042,726_(20.64%)	84,684,969,481_(29.42%)	59,434,924,253_(20.65%)	5,449,015_(0%)	0.4129	89.5203X	54888.2
SMU032-B	1110861391	1,108,755,471_(99.81%)	41,166,863_(3.71%)	554092656	554662815	1106855056	1900415	162425405458	222392193	400	40.0231	47,535,852,814_(29.28%)	33,433,680,217_(20.59%)	47,856,317,502_(29.48%)	33,514,338,510_(20.64%)	3,383,011_(0%)	0.4124	50.4843X	7927.09
SMU032-T	1740469989	1,737,006,445_(99.8%)	61,565,112_(3.54%)	868180553	868825892	1733933767	3072678	254756743577	353446713	435	40.4187	74,793,692,114_(29.37%)	52,361,802,462_(20.56%)	75,177,557,009_(29.52%)	52,295,292,681_(20.54%)	5,291,413_(0%)	0.411	79.1822X	70387.5
SMU039-B	1119491762	1,117,567,803_(99.83%)	40,560,653_(3.62%)	558670105	558897698	1115834765	1733038	164108738105	220287568	374	39.8897	47,819,870,874_(29.15%)	33,985,826,677_(20.72%)	48,128,028,154_(29.34%)	34,092,789,792_(20.78%)	3,434,609_(0%)	0.415	51.0075X	5687.64
SMU039-T	1805706421	1,801,595,473_(99.77%)	65,680,298_(3.64%)	899813301	901782172	1798288536	3306937	264344664871	342577892	339	39.9233	76,380,668,326_(28.91%)	55,501,251,563_(21%)	76,778,373,292_(29.06%)	55,570,273,137_(21.03%)	5,585,761_(0%)	0.4204	82.1623X	30750.4
SMU041-B	1011642339	1,009,247,025_(99.76%)	35,655,705_(3.52%)	504541804	504705221	1007038200	2208825	148313442997	206984315	436	40.4522	43,464,230,806_(29.32%)	30,460,946,626_(20.55%)	43,689,895,875_(29.47%)	30,627,086,331_(20.66%)	3,090,460_(0%)	0.4121	46.0981X	8126.35
SMU041-T	2214588349	2,208,909,462_(99.74%)	75,676,336_(3.42%)	1105255698	1103653764	2203821836	5087626	326369610239	457767598	450	40.8262	95,227,494,598_(29.19%)	67,682,428,681_(20.75%)	95,541,950,785_(29.29%)	67,785,278,549_(20.78%)	6,815,953_(0%)	0.4152	101.4406X	59636.6
SMU047-B	937740538	935,564,533_(99.77%)	34,408,145_(3.67%)	468168865	467395668	933584237	1980296	137865279801	171681215	416	38.947	40,107,664,309_(29.11%)	28,634,772,245_(20.78%)	40,325,011,521_(29.26%)	28,729,663,190_(20.85%)	2,067,847_(0%)	0.4163	42.8506X	5297.53
SMU047-T	2506458411	2,499,407,034_(99.72%)	90,903,302_(3.63%)	1251297668	1248109366	2493409576	5997458	368897573067	478237588	434	39.2392	107,532,267,329_(29.16%)	76,556,517,572_(20.76%)	107,958,981,362_(29.28%)	76,683,436,843_(20.8%)	5,538,791_(0%)	0.4156	114.6589X	56180.9
SMU050-B	1261489760	1,258,518,625_(99.76%)	46,108,398_(3.66%)	629120824	629397801	1255703540	2815085	185105230710	257326437	433	38.9838	54,046,267,205_(29.21%)	38,197,864,024_(20.65%)	54,401,497,478_(29.4%)	38,367,288,239_(20.74%)	3,842,448_(0%)	0.4138	57.5335X	6661.68
SMU050-T	2194207796	2,188,927,818_(99.76%)	76,416,285_(3.48%)	1094403632	1094524186	2184069186	4858632	322253812643	451646298	415	39.3707	94,329,901,603_(29.29%)	66,441,909,420_(20.63%)	94,808,508,841_(29.43%)	66,517,041,489_(20.65%)	6,716,961_(0%)	0.4128	100.1614X	73946.5
SMU061-B	1136700742	1,133,875,180_(99.75%)	41,725,842_(3.67%)	567262768	566612412	1131525962	2349218	166975687235	181502986	396	40.1811	48,549,262,612_(29.09%)	34,706,526,069_(20.8%)	48,787,969,375_(29.23%)	34,845,909,463_(20.88%)	2,737,411_(0%)	0.4168	51.8986X	8803.8
SMU061-T	2311616051	2,305,133,325_(99.72%)	80,866,358_(3.5%)	1153185923	1151947402	2300432211	4701114	338081552932	387379699	414	40.7763	99,615,071,643_(29.48%)	69,138,009,008_(20.46%)	99,960,356,957_(29.58%)	69,195,085,707_(20.48%)	5,563,038_(0%)	0.4094	105.0809X	94886.6
SMU062-B	806701673	804,604,685_(99.74%)	29,779,601_(3.69%)	402179221	402425464	802713948	1890737	117943338414	154763832	399	40.07	34,364,709,906_(29.15%)	24,419,093,287_(20.71%)	34,554,919,397_(29.31%)	24,544,622,089_(20.82%)	1,775,347_(0%)	0.4154	36.6586X	7768.09
SMU062-T	2423991055	2,415,890,450_(99.67%)	86,651,542_(3.57%)	1207319997	1208570453	2408965489	6924961	353960909917	479205086	398	40.5401	103,390,767,167_(29.22%)	73,181,418,376_(20.69%)	103,836,970,092_(29.35%)	73,376,958,538_(20.74%)	5,333,644_(0%)	0.4143	110.0164X	78245.7
SMU064-B	865310513	861,569,667_(99.57%)	32,325,150_(3.74%)	429773190	431796477	858039449	3530218	125718719729	157161949	375	39.6927	36,596,268,528_(29.12%)	26,078,982,130_(20.75%)	36,822,367,085_(29.3%)	26,154,847,580_(20.82%)	1,894,726_(0%)	0.4157	39.0753X	4471.48
SMU064-T	1680581343	1,676,585,143_(99.76%)	63,228,858_(3.76%)	838153776	838431367	1673271275	3313868	246390023496	309580721	402	40.2501	70,971,332,747_(28.82%)	51,979,037,723_(21.11%)	71,295,289,776_(28.95%)	52,015,338,631_(21.12%)	3,708,344_(0%)	0.4223	76.5817X	46633.3
SMU068-B	931140829	927,918,812_(99.65%)	34,647,681_(3.72%)	463685073	464233739	924933765	2985047	135966452576	175498943	416	39.3855	39,489,143,207_(29.06%)	28,300,106,460_(20.82%)	39,670,640,933_(29.19%)	28,436,503,331_(20.93%)	2,039,231_(0%)	0.4175	42.2604X	7823.72
SMU068-T	2078958470	2,068,956,306_(99.52%)	76,916,012_(3.7%)	1032730924	1036225382	2060789236	8167070	302496247928	395293913	418	39.8578	88,415,582,042_(29.24%)	62,550,181,421_(20.69%)	88,741,774,782_(29.35%)	62,645,160,989_(20.72%)	4,563,152_(0%)	0.4141	94.0204X	61756.8
SMU076-B	1062304237	1,059,948,231_(99.78%)	39,022,252_(3.67%)	530078488	529869743	1057935244	2012987	156164545506	169897730	407	39.9029	45,404,097,806_(29.09%)	32,447,374,403_(20.79%)	45,682,206,864_(29.27%)	32,557,031,619_(20.86%)	1,086,662_(0%)	0.4165	48.5383X	3548.08
SMU076-T	2040908010	2,036,196,130_(99.77%)	71,889,109_(3.52%)	1018375656	1017820474	2032584088	3612042	299524731584	330227534	409	40.4516	87,779,872,719_(29.32%)	61,643,867,908_(20.59%)	88,233,020,057_(29.47%)	61,729,518,254_(20.62%)	2,078,073_(0%)	0.4121	93.0968X	43554.5
SMU079-B	1040390406	1,037,971,692_(99.77%)	38,362,192_(3.69%)	519402953	518568739	1035901687	2070005	152896082897	174203725	408	39.9379	44,603,378,973_(29.19%)	31,617,472,784_(20.69%)	44,811,772,968_(29.32%)	31,790,040,058_(20.8%)	1,050,866_(0%)	0.4149	47.5224X	6002.24
SMU079-T	1728226495	1,724,019,169_(99.76%)	60,430,057_(3.5%)	862755256	861263913	1720623507	3395662	254197473508	292991384	407	40.1648	74,426,448,735_(29.29%)	52,432,190,852_(20.64%)	74,693,402,997_(29.4%)	52,535,763,646_(20.68%)	1,749,417_(0%)	0.4131	79.0084X	52949.1
SMU080-B	802019050	800,187,689_(99.77%)	29,433,766_(3.67%)	400437983	399749706	798615017	1572672	117849073855	129668244	425	39.3133	34,345,239,881_(29.16%)	24,397,044,782_(20.71%)	34,570,226,772_(29.35%)	24,478,281,201_(20.78%)	815,264_(0%)	0.4149	36.6293X	4590.31
SMU080-T	1778417985	1,774,216,485_(99.76%)	66,280,236_(3.73%)	887890855	886325630	1770784433	3432052	261314426225	290162588	404	39.9168	76,265,383,002_(29.2%)	54,120,455,754_(20.72%)	76,618,563,452_(29.33%)	54,194,812,383_(20.75%)	1,805,687_(0%)	0.4147	81.2205X	36517.9
SMU083-B	885970477	883,999,786_(99.78%)	32,633,060_(3.68%)	442426451	441573335	882273795	1725991	130219434294	146157182	421	39.7355	37,872,660,163_(29.1%)	27,063,861,783_(20.79%)	38,099,985,134_(29.27%)	27,118,151,660_(20.84%)	885,116_(0%)	0.4163	40.4742X	3383.09
SMU083-T	1540492322	1,534,939,686_(99.64%)	54,515,529_(3.54%)	768626290	766313396	1530752668	4187018	225990188761	244049831	464	40.1275	66,032,437,223_(29.23%)	46,762,144,869_(20.7%)	66,346,442,709_(29.37%)	46,743,101,299_(20.69%)	1,571,345_(0%)	0.414	70.2412X	42562.4
SMU087-B	1187047553	1,184,687,827_(99.8%)	43,885,192_(3.7%)	592548054	592139773	1182750054	1937773	174192043913	171816438	364	39.9266	50,902,772,807_(29.24%)	35,942,858,721_(20.64%)	51,140,431,270_(29.37%)	36,115,803,545_(20.74%)	3,425,579_(0%)	0.4139	54.1415X	6170.59
SMU087-T	2074076080	2,069,319,055_(99.77%)	71,679,888_(3.46%)	1035418104	1033900951	2065499904	3819151	304813212714	296846002	407	40.5414	89,329,870,375_(29.32%)	62,820,518,771_(20.62%)	89,625,459,661_(29.42%)	62,895,965,758_(20.64%)	6,005,226_(0%)	0.4126	94.7405X	50496.4
SMU089-B	1069768482	1,067,495,750_(99.79%)	39,160,581_(3.66%)	534119573	533376177	1065519620	1976130	157107649214	156503865	412	39.337	45,880,026,514_(29.22%)	32,444,477,801_(20.66%)	46,082,990,348_(29.35%)	32,621,620,784_(20.77%)	3,058,870_(0%)	0.4144	48.8314X	6686.58
SMU089-T	2237873887	2,231,334,401_(99.71%)	78,813,653_(3.52%)	1116444922	1114889479	2226756593	4577808	328683369648	327295239	425	40.0252	96,209,430,249_(29.29%)	67,807,519,080_(20.64%)	96,530,348,882_(29.38%)	67,979,080,390_(20.69%)	6,457,014_(0%)	0.4133	102.1598X	61137.5
SMU091-B	1158812694	1,156,154,237_(99.77%)	42,407,320_(3.66%)	578533765	577620472	1153871163	2283074	170144965116	170365318	420	40.4256	49,830,263,625_(29.3%)	34,993,952,669_(20.58%)	50,156,037,086_(29.49%)	35,076,680,209_(20.63%)	3,332,566_(0%)	0.412	52.8836X	8047.63
SMU091-T	2499708294	2,490,905,213_(99.65%)	88,630,333_(3.55%)	1247310607	1243594606	2483461644	7443569	366812562500	361414306	432	40.9427	107,102,936,090_(29.21%)	76,004,522,608_(20.73%)	107,609,364,648_(29.35%)	75,926,156,032_(20.71%)	7,197,087_(0%)	0.4144	114.0109X	72064.9
SMU094-B	966269618	964,078,714_(99.77%)	36,193,786_(3.75%)	482126860	481951854	962092516	1986198	141691104980	148075212	426	39.1332	41,325,448,825_(29.18%)	29,302,372,882_(20.69%)	41,604,441,509_(29.38%)	29,384,377,329_(20.75%)	2,767,653_(0%)	0.4144	44.0397X	9673.19
SMU094-T	2216725299	2,211,287,449_(99.75%)	79,311,872_(3.58%)	1105258398	1106029051	2206718077	4569372	324087305276	350515760	348	39.2258	94,944,885,023_(29.31%)	66,717,208,757_(20.6%)	95,480,362,243_(29.48%)	66,782,410,661_(20.62%)	6,429,000_(0%)	0.4121	100.7312X	57822.5
SMU097-B	1015668223	1,013,868,465_(99.82%)	37,521,114_(3.69%)	506918418	506950047	1012331653	1536812	149005249846	147634522	381	40.4207	43,598,397,053_(29.27%)	30,676,770,483_(20.6%)	43,922,648,136_(29.49%)	30,730,968,941_(20.63%)	1,185,756_(0%)	0.4123	46.3131X	11201.1
SMU097-T	1945089507	1,941,163,446_(99.8%)	68,978,684_(3.55%)	970810013	970353433	1937947894	3215552	285875789022	284539087	423	40.8385	83,715,387,112_(29.3%)	59,006,220,350_(20.65%)	84,120,713,616_(29.44%)	58,902,017,441_(20.61%)	2,268,021_(0%)	0.4126	88.8545X	77450.2
SMU098-B	832936669	831,459,724_(99.82%)	30,092,823_(3.61%)	415752521	415707203	830199777	1259947	122383645399	120824735	416	39.9709	35,796,400,471_(29.26%)	25,221,132,055_(20.62%)	35,975,287,005_(29.41%)	25,331,502,849_(20.71%)	966,099_(0%)	0.4133	38.0387X	5636.26
SMU098-T	1689020875	1,685,899,802_(99.82%)	58,481,931_(3.46%)	843049913	842849889	1683326080	2573722	247922049766	242040818	411	40.587	72,677,174,704_(29.33%)	51,087,641,340_(20.62%)	72,934,854,279_(29.43%)	51,110,856,147_(20.62%)	1,974,625_(0%)	0.4124	77.0579X	55168.1
SMU100-B	861845040	859,967,405_(99.78%)	31,960,540_(3.71%)	430280704	429686701	858251486	1715919	126596183101	124272817	460	39.9591	36,950,951,699_(29.2%)	26,158,275,465_(20.67%)	37,164,423,743_(29.37%)	26,261,527,296_(20.75%)	988,058_(0%)	0.4143	39.348X	5876.2
SMU100-T	1706087383	1,701,816,706_(99.75%)	61,972,825_(3.63%)	850897051	850919655	1698714238	3102468	250242095119	241900082	421	40.5351	73,300,534,703_(29.31%)	51,575,492,946_(20.62%)	73,646,646,066_(29.44%)	51,600,003,341_(20.63%)	1,988,630_(0%)	0.4125	77.779X	71507.9
SMU101-B	1021039204	1,018,928,014_(99.79%)	37,688,576_(3.69%)	509690953	509237061	1017056845	1871169	150109888399	147756765	443	40.358	43,794,793,796_(29.19%)	31,017,433,155_(20.67%)	44,007,892,229_(29.33%)	31,215,364,636_(20.81%)	1,183,543_(0%)	0.4148	46.6564X	7009.73
SMU101-T	2071770918	2,067,002,676_(99.77%)	73,931,893_(3.57%)	1034080706	1032921970	2063047646	3955030	304506953971	304714316	431	40.9087	89,039,701,016_(29.25%)	62,866,553,648_(20.66%)	89,376,240,640_(29.37%)	63,078,255,036_(20.72%)	2,423,274_(0%)	0.4138	94.6454X	61289.2
SMU104-B	931372231	929,294,549_(99.78%)	34,926,707_(3.75%)	465048711	464245838	927407447	1887102	136579208193	137229257	403	38.8716	39,725,528,592_(29.1%)	28,381,835,599_(20.79%)	40,015,795,224_(29.31%)	28,379,941,722_(20.79%)	1,088,079_(0%)	0.4158	42.4509X	7232.14
SMU104-T	1901552940	1,897,055,147_(99.76%)	68,200,972_(3.59%)	949513725	947541422	1893161801	3893346	279207863647	285319400	425	39.1242	81,495,795,131_(29.2%)	57,883,589,438_(20.74%)	81,911,644,118_(29.35%)	57,777,161,104_(20.7%)	2,225,768_(0%)	0.4145	86.782X	62184.6
SMU106-B	894785067	892,661,598_(99.76%)	33,433,657_(3.74%)	446832892	445828706	890722538	1939060	131220614448	131980432	416	40.0415	38,178,371,076_(29.11%)	27,253,161,644_(20.78%)	38,389,959,416_(29.27%)	27,333,118,415_(20.84%)	1,291,059_(0%)	0.4162	40.7853X	6902.7
SMU106-T	2145136202	2,138,663,362_(99.7%)	76,369,997_(3.56%)	1070461930	1068201432	2133517080	5146282	314443088565	320544531	407	40.0252	92,096,211,045_(29.3%)	64,826,543,947_(20.63%)	92,487,020,138_(29.43%)	64,886,792,946_(20.65%)	3,117,620_(0%)	0.4127	97.7337X	64678.4
SMU107-B	1036948263	1,034,215,441_(99.74%)	38,457,977_(3.71%)	517804274	516411167	1031682762	2532679	152041426501	152505017	437	39.75	44,209,462,054_(29.09%)	31,584,452,166_(20.78%)	44,471,385,249_(29.26%)	31,699,886,879_(20.86%)	1,505,519_(0%)	0.4164	47.2568X	6668.43
SMU107-T	2070674020	2,065,620,801_(99.76%)	72,831,289_(3.52%)	1033945417	1031675384	2061235684	4385117	304202709458	305586970	422	40.4219	88,847,986,030_(29.22%)	62,967,396,477_(20.71%)	89,224,777,991_(29.34%)	63,020,641,115_(20.73%)	3,012,647_(0%)	0.4144	94.5508X	63986.8
SMU109-B	1107226015	1,105,491,295_(99.84%)	40,793,176_(3.68%)	552723884	552767411	1104008287	1483008	161490250085	178656738	332	39.6835	47,079,857,090_(29.17%)	33,427,487,217_(20.71%)	47,362,905,791_(29.34%)	33,539,943,111_(20.78%)	1,595,097_(0%)	0.4149	50.1936X	6273.98
SMU109-T	2085317428	2,081,108,243_(99.8%)	75,004,985_(3.6%)	1040888457	1040219786	2077549961	3558282	305812867013	330818946	376	40.1986	88,349,853,005_(28.9%)	64,230,894,849_(21.01%)	88,809,959,730_(29.05%)	64,286,589,285_(21.03%)	2,942,474_(0%)	0.4204	95.0513X	37617.5
SMU111-B	954450367	952,650,415_(99.81%)	34,825,577_(3.65%)	476410442	476239973	951114741	1535674	139571197045	153691744	383	40.697	40,856,047,270_(29.29%)	28,745,561,847_(20.61%)	41,026,668,649_(29.41%)	28,873,465,165_(20.7%)	1,382,312_(0%)	0.413	43.3808X	7980.41
SMU111-T	2314117033	2,309,755,431_(99.81%)	83,107,948_(3.59%)	1155087730	1154667701	2306281844	3473587	339732210237	368012328	383	41.2889	99,216,931,821_(29.22%)	70,245,952,612_(20.69%)	99,602,919,835_(29.33%)	70,505,081,473_(20.76%)	3,364,700_(0%)	0.4145	105.5939X	20303.4
SMU132-B	1251373285	1,248,818,738_(99.8%)	45,255,304_(3.62%)	624678088	624140650	1246571509	2247229	183380095738	202386635	407	40.0883	53,478,067,047_(29.18%)	37,904,636,993_(20.68%)	53,785,441,023_(29.34%)	38,124,913,823_(20.8%)	1,809,005_(0%)	0.4148	56.9973X	5287.31
SMU132-T	1763621431	1,759,497,169_(99.77%)	58,007,922_(3.29%)	879726963	879770206	1756707631	2789538	258475678553	276638273	392	40.8042	76,358,670,067_(29.55%)	52,628,548,817_(20.37%)	76,643,483,767_(29.66%)	52,738,799,744_(20.41%)	2,572,117_(0%)	0.4078	80.3381X	34530.7
SMU141-B	956029499	953,877,019_(99.77%)	35,246,155_(3.69%)	477205706	476671313	951930985	1946034	140010411775	152982177	428	40.7765	40,900,958,849_(29.23%)	28,898,356,096_(20.65%)	41,062,999,530_(29.34%)	29,077,832,827_(20.78%)	1,385,427_(0%)	0.4143	43.5173X	3236.68
SMU141-T	2137499557	2,132,189,118_(99.75%)	79,626,434_(3.73%)	1067098311	1065090807	2127537602	4651516	314243631467	346559007	453	41.2526	91,097,952,393_(29%)	65,712,783,497_(20.92%)	91,378,069,274_(29.09%)	65,913,143,987_(20.98%)	3,103,620_(0%)	0.4191	97.6717X	42771.1
SMU142-B	966894747	964,316,006_(99.73%)	35,208,073_(3.64%)	482383052	481932954	962031086	2284920	141924249393	130704137	408	39.9842	41,423,724,130_(29.2%)	29,303,946,949_(20.66%)	41,581,175,970_(29.31%)	29,547,785,184_(20.83%)	879,136_(0%)	0.4149	44.1122X	3227.95
SMU142-T	2118759232	2,113,080,799_(99.73%)	79,910,421_(3.77%)	1057185242	1055895557	2108383432	4697367	311191983988	305509651	388	40.615	90,043,350,189_(28.95%)	65,153,187,287_(20.95%)	90,342,348,983_(29.04%)	65,515,074,923_(21.06%)	1,927,296_(0%)	0.4201	96.7232X	20466.6
SMU157-B	855022659	852,963,306_(99.76%)	30,797,657_(3.6%)	426720345	426242961	851152333	1810973	125625350202	123165792	423	40.3956	36,690,819,169_(29.22%)	25,921,540,198_(20.64%)	36,813,107,830_(29.32%)	26,140,030,689_(20.82%)	713,325_(0%)	0.4146	39.0463X	3938.43
SMU157-T	1900752540	1,895,703,899_(99.73%)	69,329,420_(3.65%)	948656876	947047023	1891469204	4234695	279442386238	275292655	420	40.9745	81,033,945,821_(29.01%)	58,329,720,981_(20.88%)	81,276,618,586_(29.1%)	58,678,356,730_(21.01%)	1,602,645_(0%)	0.4189	86.8549X	20081.8
SMU159-B	980331972	978,346,090_(99.8%)	35,967,777_(3.67%)	489366436	488979654	976693282	1652808	144220827884	140952005	415	40.0561	41,959,586,540_(29.11%)	29,908,352,371_(20.75%)	42,256,609,690_(29.31%)	30,026,804,419_(20.83%)	823,852_(0%)	0.4158	44.826X	6722.54
SMU159-T	1673844806	1,669,918,082_(99.77%)	61,556,926_(3.68%)	835421637	834496445	1666804391	3113691	246493592530	222573397	389	40.7241	71,241,663,438_(28.91%)	51,728,933,911_(20.99%)	71,582,539,904_(29.05%)	51,836,177,363_(21.04%)	1,399,289_(0%)	0.4203	76.6139X	25323.1
SMU161-B	958098600	956,034,148_(99.78%)	35,789,062_(3.74%)	478354286	477679862	954204550	1829598	140759841141	139348203	444	40.4844	40,963,957,190_(29.12%)	29,217,064,605_(20.77%)	41,220,312,410_(29.3%)	29,289,953,461_(20.82%)	793,078_(0%)	0.4159	43.7503X	4221.35
SMU161-T	1911675628	1,906,204,872_(99.71%)	70,817,069_(3.7%)	953565957	952638915	1902290244	3914628	281107138432	266189291	405	41.1528	81,255,543,322_(28.92%)	58,981,172,922_(20.99%)	81,645,673,521_(29.06%)	59,100,780,688_(21.03%)	1,623,479_(0%)	0.4202	87.3723X	19165.3
SMU167-B	1143539561	1,140,767,649_(99.76%)	42,776,555_(3.74%)	570807568	569960081	1138340704	2426945	167954933016	164707795	399	40.3577	48,815,162,467_(29.08%)	34,916,563,588_(20.8%)	49,110,510,769_(29.25%)	35,030,335,821_(20.87%)	977,264_(0%)	0.4167	52.2029X	4980.55
SMU167-T	2136965623	2,129,828,740_(99.67%)	74,472,614_(3.48%)	1065668613	1064160127	2125475059	4353681	314454899684	303925669	434	40.6197	91,845,910,922_(29.22%)	65,120,534,656_(20.72%)	92,176,501,828_(29.33%)	65,182,437,088_(20.74%)	1,810,274_(0%)	0.4145	97.7373X	48461.6
SMU177-B	803557870	801,725,378_(99.77%)	30,603,823_(3.81%)	400997560	400727818	800088482	1636896	117676526981	119884032	403	40.2107	34,132,833,551_(29.02%)	24,537,954,114_(20.86%)	34,380,324,518_(29.23%)	24,562,073,847_(20.88%)	920,694_(0%)	0.4175	36.5756X	3458.7
SMU177-T	1573075303	1,568,366,135_(99.7%)	57,774,607_(3.67%)	784536513	783829622	1564719121	3647014	230750130544	227674445	401	40.8187	66,857,901,089_(28.99%)	48,271,347,290_(20.93%)	67,194,093,284_(29.13%)	48,321,288,746_(20.95%)	1,832,733_(0%)	0.4188	71.7206X	20435.6
SMU183-B	884129843	881,923,733_(99.75%)	32,761,161_(3.71%)	441178208	440745525	879948777	1974956	129644539637	135123536	426	39.4721	37,652,020,326_(29.06%)	26,988,237,812_(20.83%)	37,888,148,227_(29.24%)	27,054,147,122_(20.88%)	1,027,009_(0%)	0.417	40.2955X	4767.22
SMU183-T	1907791958	1,902,218,027_(99.71%)	68,104,158_(3.57%)	951647958	950570069	1898250894	3967133	280119337335	289613963	390	39.9516	81,454,362,408_(29.09%)	58,324,107,334_(20.83%)	81,802,382,163_(29.22%)	58,412,129,644_(20.86%)	2,214,744_(0%)	0.4169	87.0653X	42675.2
SMU195-B	849926265	847,724,059_(99.74%)	31,483,670_(3.7%)	424193990	423530069	845795708	1928351	124761567010	154772389	399	40.1105	36,318,675,802_(29.12%)	25,883,502,270_(20.76%)	36,517,439,819_(29.28%)	25,981,104,710_(20.83%)	987,077_(0%)	0.4159	38.7778X	4340.35
SMU195-T	2836620204	2,829,837,590_(99.76%)	99,773,751_(3.52%)	1415880074	1413957516	2824791567	5046023	417694459850	536990593	427	40.8532	122,019,266,123_(29.23%)	86,501,714,284_(20.72%)	122,393,697,811_(29.31%)	86,601,547,612_(20.74%)	3,305,368_(0%)	0.4146	129.8257X	92426.3
SMU196-B	1218811855	1,215,966,948_(99.77%)	44,813,389_(3.68%)	608461099	607505849	1213520947	2446001	179229804745	222094915	418	39.9457	52,056,908,745_(29.06%)	37,306,293,511_(20.82%)	52,306,715,050_(29.2%)	37,476,205,511_(20.92%)	1,412,390_(0%)	0.4174	55.7073X	6457
SMU196-T	2555840987	2,541,402,347_(99.44%)	80,581,502_(3.15%)	1270798178	1270604169	2537482357	3919990	373805086167	444175565	387	40.4374	111,725,422,184_(29.9%)	74,840,601,623_(20.03%)	112,140,633,921_(30.01%)	74,950,427,418_(20.06%)	2,993,820_(0%)	0.4009	116.1843X	66797.7
SMU200-B	1187672224	1,184,813,054_(99.76%)	44,059,393_(3.71%)	592809616	592003438	1182546217	2266837	174403520743	215527551	390	40.4284	50,671,311,680_(29.07%)	36,283,547,124_(20.81%)	50,974,109,972_(29.24%)	36,386,836,748_(20.87%)	1,377,182_(0%)	0.4169	54.2072X	7099
SMU200-T	1792832566	1,785,691,197_(99.6%)	55,642,203_(3.1%)	892823159	892868038	1782307257	3383940	261867101763	300480711	369	40.9957	78,541,802,476_(30%)	52,125,985,103_(19.91%)	78,866,596,908_(30.13%)	52,229,418,843_(19.95%)	2,100,777_(0%)	0.3987	81.3922X	31092.7
TSH001-B	1197733762	1,192,017,505_(99.52%)	43,792,922_(3.66%)	594579402	597438103	1186638933	5378572	173821922902	219438328	435	39.6194	50,692,462,428_(29.18%)	35,963,622,505_(20.7%)	51,042,791,538_(29.38%)	36,033,570,980_(20.74%)	3,212,731_(0%)	0.4144	54.0265X	7125.66
TSH001-T	1799053666	1,778,392,873_(98.85%)	63,071,263_(3.51%)	888894261	889498612	1772120543	6272330	261149205678	316518631	438	40.0311	76,159,733,242_(29.18%)	54,130,258,827_(20.74%)	76,580,812,306_(29.34%)	54,156,595,105_(20.75%)	4,876,659_(0%)	0.4148	81.1691X	36006.1
TSH003-B	863530686	861,469,077_(99.76%)	32,053,284_(3.71%)	431023329	430445748	859580630	1888447	126753257278	159962869	404	39.7193	36,839,958,182_(29.08%)	26,332,649,703_(20.79%)	37,040,401,955_(29.24%)	26,474,833,367_(20.9%)	2,638,459_(0%)	0.4168	39.3968X	6586.3
TSH003-T	1647940823	1,637,518,942_(99.37%)	57,476,898_(3.49%)	819346261	818172681	1634018104	3500838	241563209344	321639167	468	40.0465	70,541,133,142_(29.22%)	49,996,974,933_(20.71%)	70,825,864,665_(29.33%)	50,090,777,052_(20.75%)	5,018,736_(0%)	0.4145	75.0815X	35338.5
TSH005-B	1023062504	1,020,881,008_(99.79%)	37,836,673_(3.7%)	510584067	510296941	1019046041	1834967	150039470542	171186759	377	40.0323	43,578,976,515_(29.06%)	31,208,495,432_(20.81%)	43,839,810,679_(29.23%)	31,336,746,541_(20.9%)	2,259,984_(0%)	0.4171	46.6345X	6193.12
TSH005-T	1671969890	1,666,387,677_(99.67%)	55,070,296_(3.29%)	833531944	832855733	1662824586	3563091	245943979219	272184911	401	40.7075	72,313,101,629_(29.41%)	50,498,447,870_(20.54%)	72,563,040,033_(29.52%)	50,469,903,136_(20.53%)	4,062,176_(0%)	0.4107	76.4431X	48903.1
TSH008-B	1275904532	1,271,439,943_(99.65%)	47,430,382_(3.72%)	635465390	635974553	1267322221	4117722	186546648778	232863191	416	37.9455	54,333,404,578_(29.14%)	38,658,573,851_(20.73%)	54,666,368,090_(29.32%)	38,798,079,895_(20.81%)	1,292,485_(0%)	0.4154	57.9815X	9351.37
TSH008-T	2708782090	2,700,997,929_(99.71%)	86,545,232_(3.19%)	1351415948	1349581981	2694606449	6391480	398335195538	506544398	432	38.1477	117,887,096,615_(29.61%)	81,270,754,197_(20.41%)	118,116,857,332_(29.66%)	80,911,452,163_(20.32%)	2,724,591_(0%)	0.4073	123.8086X	191786
TSH012-B	880770748	878,634,778_(99.76%)	31,380,316_(3.56%)	439611766	439023012	876787238	1847540	129356274136	120787772	434	39.3735	37,896,237,133_(29.31%)	26,603,831,089_(20.58%)	38,044,187,469_(29.42%)	26,750,053,252_(20.69%)	2,518,172_(0%)	0.4127	40.2059X	5775.97
TSH012-T	1680901696	1,676,002,232_(99.71%)	57,307,899_(3.41%)	838416802	837585430	1672478225	3524007	247127410960	228271053	413	39.8638	72,549,080,084_(29.37%)	50,793,279,774_(20.56%)	72,786,900,556_(29.47%)	50,889,804,575_(20.6%)	4,855,217_(0%)	0.4116	76.8109X	39935.5
TSH013-B	921895760	917,570,209_(99.53%)	33,741,266_(3.66%)	458192410	459377799	913504876	4065333	134126459358	145892506	419	40.1158	39,165,944,771_(29.21%)	27,700,376,016_(20.66%)	39,313,142,712_(29.32%)	27,882,927,625_(20.8%)	1,069,933_(0%)	0.4146	41.6885X	5610.4
UP2003-B	1056644523	965,368,275_(91.36%)	35,133,882_(3.33%)	484858774	480509501	960502013	4866262	140799339019	152936667	402	38.4674	41,089,281,434_(29.2%)	29,029,466,932_(20.63%)	41,345,038,650_(29.38%)	29,246,998,667_(20.79%)	24,754,127_(0.02%)	0.4142	43.7626X	5705.04
UP2003-T	1963214611	1,918,184,799_(97.71%)	66,322,380_(3.38%)	963873158	954311641	1907709806	10474993	279728229104	291132387	444	38.5	82,120,222,466_(29.37%)	57,339,034,634_(20.51%)	82,444,133,614_(29.49%)	57,656,305,495_(20.62%)	46,900,023_(0.02%)	0.4113	86.9438X	56566.9
UP2004-B	1160086116	1,158,184,241_(99.84%)	42,338,821_(3.65%)	579353637	578830604	1156531927	1652314	171355937799	236631446	424	39.9415	49,947,021,414_(29.16%)	35,456,060,210_(20.7%)	50,229,448,630_(29.33%)	35,639,289,617_(20.81%)	2,304,040_(0%)	0.4151	53.26X	5190.06
UP2004-T	2522202406	2,517,604,673_(99.82%)	89,776,666_(3.56%)	1259359842	1258244831	2514007852	3596821	372729116726	522423215	421	40.2642	108,880,395,252_(29.23%)	77,012,980,937_(20.67%)	109,373,698,397_(29.36%)	77,280,877,632_(20.74%)	5,054,018_(0%)	0.4142	115.8498X	34725.5
UP2035-B	1137876031	1,135,528,266_(99.79%)	41,354,838_(3.63%)	567916177	567612089	1133531879	1996387	167345875517	182319398	396	39.2162	49,108,520,682_(29.36%)	34,303,689,949_(20.51%)	49,417,691,768_(29.55%)	34,430,944,919_(20.59%)	1,366,188_(0%)	0.4109	52.0136X	4706.41
UP2035-T	2387715079	2,382,552,390_(99.78%)	84,030,397_(3.52%)	1191210120	1191342270	2379102748	3449642	350375461256	380465905	357	39.6171	103,409,864,663_(29.53%)	71,282,844,457_(20.35%)	103,998,959,497_(29.7%)	71,508,484,086_(20.42%)	2,905,804_(0%)	0.4077	108.902X	33157.1
UP2037-B	1384093024	1,381,760,549_(99.83%)	50,869,349_(3.68%)	691159050	690601499	1379857816	1902733	203210158075	301120706	395	39.6868	59,657,897,363_(29.37%)	41,622,168,166_(20.49%)	60,056,335,514_(29.57%)	41,772,115,378_(20.57%)	1,403,626_(0%)	0.4106	63.1608X	5615.3
UP2037-T	2204019999	2,199,718,120_(99.8%)	78,824,808_(3.58%)	1100362837	1099355283	2196619973	3098147	324617869097	459300537	398	39.8021	95,385,864,558_(29.4%)	66,446,505,559_(20.48%)	95,993,802,282_(29.59%)	66,634,949,075_(20.54%)	2,233,868_(0%)	0.4102	100.8961X	24624.3
UP2039-B	927711262	915,192,145_(98.65%)	33,577,150_(3.62%)	459467831	455724314	911033423	4158722	133204485264	90523286	449	37.9664	38,941,491,682_(29.26%)	27,396,369,568_(20.58%)	39,162,427,296_(29.42%)	27,606,891,324_(20.74%)	34,050,126_(0.03%)	0.4132	41.402X	3933.88
UP2039-T	1747361012	1,676,959,110_(95.97%)	59,026,640_(3.38%)	842319837	834639273	1668793010	8166100	244920882037	251722877	465	38.3814	72,081,851,390_(29.45%)	49,784,329,604_(20.34%)	72,606,297,048_(29.67%)	50,269,067,078_(20.54%)	46,967,736_(0.02%)	0.4088	76.1251X	28450.3
UP2041-B	1149979111	1,147,938,568_(99.82%)	40,879,056_(3.55%)	574093498	573845070	1146231064	1707504	169646492929	176166486	403	38.8776	50,003,525,578_(29.49%)	34,584,604,010_(20.4%)	50,170,100,978_(29.59%)	34,815,581,154_(20.53%)	1,374,101_(0%)	0.4093	52.7287X	4118.36
UP2041-T	1782782960	1,777,723,507_(99.72%)	62,262,096_(3.49%)	888806816	888916691	1774547439	3176068	262195230431	279046817	375	39.5288	77,322,127,787_(29.5%)	53,459,535,643_(20.4%)	77,560,188,740_(29.59%)	53,742,445,051_(20.51%)	2,160,015_(0%)	0.409	81.4942X	25265.6
UP2048-B	1157022107	1,152,300,541_(99.59%)	41,420,702_(3.58%)	577498871	574801670	1148331660	3968881	169742815589	141339244	385	39.5979	50,086,120,783_(29.52%)	34,526,862,342_(20.35%)	50,315,986,169_(29.66%)	34,734,609,597_(20.47%)	1,526,059_(0%)	0.4082	52.7586X	7304.6
UP2048-T	1915494277	1,908,227,828_(99.62%)	68,360,314_(3.57%)	955711819	952516009	1902621724	5606104	281043830494	260864227	415	40.0352	82,723,510,338_(29.45%)	57,419,627,400_(20.44%)	83,080,140,420_(29.57%)	57,692,184,770_(20.54%)	2,600,857_(0%)	0.4098	87.3527X	18928
UP2049-B	1050423864	1,048,567,347_(99.82%)	38,995,995_(3.71%)	524407158	524160189	1046837548	1729799	154612214225	147033930	448	39.723	44,961,736,872_(29.1%)	32,114,572,351_(20.78%)	45,267,491,237_(29.29%)	32,188,182,257_(20.83%)	1,440,137_(0%)	0.4161	48.0558X	4930.78
UP2049-T	2309559749	2,304,492,933_(99.78%)	77,863,526_(3.37%)	1151808699	1152684234	2300092176	4400757	339678913925	330694721	390	40.1767	100,622,982,290_(29.64%)	68,659,431,445_(20.22%)	101,282,634,059_(29.83%)	68,940,978,796_(20.31%)	3,177,968_(0%)	0.4053	105.5773X	34874.7
UP2050-B	842789737	839,400,796_(99.6%)	29,988,807_(3.56%)	420519441	418881355	836748174	2652622	123395283936	112398594	347	39.0406	36,304,440,381_(29.44%)	25,228,601,565_(20.46%)	36,491,859,522_(29.59%)	25,310,628,330_(20.52%)	2,348,905_(0%)	0.4098	38.3531X	2891.36
UP2050-T	1571949973	1,564,480,992_(99.52%)	58,568,959_(3.73%)	784169112	780311880	1558923852	5557140	230403599493	191699822	393	39.2589	67,691,315,297_(29.39%)	47,319,426,612_(20.55%)	67,917,275,806_(29.49%)	47,373,081,198_(20.57%)	4,343,451_(0%)	0.4112	71.6129X	29414.7
UP2063-B	1013949493	1,012,188,605_(99.83%)	37,617,611_(3.71%)	506192633	505995972	1010564267	1624338	149365362169	138830922	431	39.3786	43,558,728,252_(29.18%)	30,884,974,835_(20.69%)	43,786,443,907_(29.33%)	31,060,340,263_(20.81%)	1,389,380_(0%)	0.4149	46.425X	3531
UP2063-T	1859934175	1,856,084,334_(99.79%)	62,154,585_(3.34%)	927992033	928092301	1852860807	3223527	274089865604	260729853	397	39.8896	81,200,941,749_(29.64%)	55,512,751,316_(20.26%)	81,582,265,567_(29.78%)	55,670,346,058_(20.32%)	2,567,773_(0%)	0.4058	85.1913X	93980.1
UP2089-B	806545055	805,010,793_(99.81%)	29,063,508_(3.6%)	402705631	402305162	803762262	1248531	118692658838	145057981	414	40.0898	34,785,850,800_(29.32%)	24,374,618,699_(20.55%)	35,002,264,461_(29.5%)	24,471,611,419_(20.63%)	819,438_(0%)	0.4117	36.8915X	3443.84
UP2089-T	2045493032	2,041,761,880_(99.82%)	72,254,434_(3.53%)	1021171591	1020590289	2038989000	2772880	301354944226	435709151	386	39.9085	87,755,098,714_(29.13%)	62,587,231,072_(20.78%)	88,181,505,726_(29.28%)	62,690,878,198_(20.81%)	2,090,140_(0%)	0.4159	93.6657X	48814.4
UP2092-B	1064869934	1,062,932,138_(99.82%)	38,413,864_(3.61%)	531541407	531390731	1061672648	1259490	156330640253	180287468	362	39.9675	45,936,143,130_(29.4%)	31,986,691,852_(20.47%)	46,228,812,295_(29.59%)	32,103,322,490_(20.55%)	744,317_(0%)	0.4102	48.5899X	4877.96
UP2092-T	1830708515	1,827,457,297_(99.82%)	63,101,754_(3.45%)	913906061	913551236	1825160952	2296345	269205981890	300806255	366	40.5535	79,551,898,200_(29.56%)	54,702,365,083_(20.33%)	79,971,096,738_(29.72%)	54,856,419,138_(20.39%)	1,265,227_(0%)	0.4072	83.6733X	16406.1
UP2093-B	973266675	971,569,834_(99.83%)	35,448,709_(3.64%)	486084997	485484837	970211779	1358055	143155186503	168283771	435	39.4967	42,121,044,341_(29.44%)	29,234,348,500_(20.43%)	42,365,986,556_(29.61%)	29,364,437,017_(20.52%)	660,399_(0%)	0.4095	44.4948X	6073.43
UP2093-T	1982422999	1,978,923,728_(99.82%)	71,068,401_(3.58%)	989958002	988965726	1976257362	2666366	291875413601	344236466	398	39.348	86,047,611,383_(29.49%)	59,492,069,858_(20.39%)	86,483,146,848_(29.64%)	59,722,565,098_(20.47%)	1,377,712_(0%)	0.4086	90.7193X	38763.2
UP2099-B	971108944	954,382,752_(98.28%)	33,637,328_(3.46%)	479168776	475213976	950180112	4202640	139080691279	170874642	438	38.3527	40,910,921,890_(29.43%)	28,369,882,821_(20.41%)	41,089,375,290_(29.56%)	28,629,602,483_(20.6%)	15,103,752_(0.01%)	0.4101	43.2284X	2597.84
UP2099-T	1857558166	1,808,966,753_(97.38%)	63,792,753_(3.43%)	908778998	900187755	1798827893	10138860	264407055320	155416241	411	38.3956	76,795,128,483_(29.06%)	55,025,980,363_(20.82%)	77,021,313,714_(29.15%)	55,417,220,330_(20.97%)	38,089,630_(0.01%)	0.4179	82.1817X	58545.7
UP2100-B	1359146503	1,354,392,790_(99.65%)	50,557,588_(3.72%)	677390117	677002673	1351276170	3116620	199125751449	200027992	414	39.7695	58,569,285,163_(29.43%)	40,705,402,767_(20.45%)	58,857,248,731_(29.57%)	40,887,335,442_(20.54%)	1,498,674_(0%)	0.41	61.8913X	6632.9
UP2100-T	2407080101	2,401,776,084_(99.78%)	87,699,502_(3.64%)	1201567775	1200208309	2398068459	3707625	353708669960	358054965	411	40.8882	103,833,278,955_(29.37%)	72,807,558,178_(20.59%)	104,105,688,527_(29.45%)	72,784,565,531_(20.59%)	2,667,443_(0%)	0.4118	109.938X	95162.8
UP2101-B	1002170397	1,000,690,905_(99.85%)	36,545,613_(3.65%)	500620758	500070147	999429737	1261168	147154282709	151375829	414	39.6446	43,329,222,362_(29.46%)	30,029,646,204_(20.42%)	43,648,338,362_(29.68%)	30,070,285,644_(20.45%)	1,111,643_(0%)	0.4086	45.7378X	6592.45
UP2101-T	1957600725	1,953,601,382_(99.8%)	68,110,976_(3.48%)	977530585	976070797	1950690834	2910548	287854639097	304479784	417	40.2324	84,920,644,001_(29.52%)	58,646,167,770_(20.38%)	85,424,615,390_(29.69%)	58,723,607,877_(20.41%)	2,166,907_(0%)	0.4079	89.4696X	26288.4
UP2103-B	871297313	869,800,800_(99.83%)	30,602,073_(3.51%)	435183924	434616876	868560449	1240351	128226410083	129436407	416	39.7589	37,743,232,910_(29.45%)	26,171,013,996_(20.42%)	37,936,397,781_(29.6%)	26,315,156,391_(20.53%)	967,819_(0%)	0.4095	39.8547X	4236.07
UP2103-T	1994910162	1,991,192,520_(99.81%)	70,788,891_(3.55%)	996154608	995037912	1988536208	2656312	294124688587	305635001	410	40.4593	86,788,220,580_(29.52%)	59,896,328,140_(20.37%)	87,146,970,094_(29.64%)	60,166,054,067_(20.46%)	2,232,436_(0%)	0.4084	91.4184X	27059.8
UP2109-B	1247960583	1,245,794,458_(99.83%)	45,759,181_(3.67%)	623319641	622474817	1244077165	1717293	183703797341	214843710	398	39.2712	53,957,125,338_(29.39%)	37,638,317,054_(20.5%)	54,203,115,862_(29.52%)	37,814,711,621_(20.59%)	869,899_(0%)	0.4109	57.0979X	7563.15
UP2109-T	1977936736	1,974,095,592_(99.81%)	71,429,230_(3.61%)	987671819	986423773	1971261324	2834268	290736253004	329755113	416	39.2523	85,622,272,830_(29.46%)	59,406,967,684_(20.44%)	85,970,199,648_(29.58%)	59,594,521,631_(20.51%)	1,317,280_(0%)	0.4095	90.3652X	40586.9
UP2113-B	1348433738	1,320,092,059_(97.9%)	46,914,427_(3.48%)	662189485	657902574	1315145824	4946235	191378389073	164801006	473	37.6839	56,103,998,747_(29.34%)	38,951,070,254_(20.37%)	56,498,408,500_(29.54%)	39,697,653,367_(20.76%)	31,600,217_(0.02%)	0.4112	59.4833X	4685.88
UP2113-T	1940901411	1,912,228,398_(98.52%)	68,753,972_(3.54%)	960649785	951578613	1901474075	10754323	279493572870	438275179	408	37.8775	81,606,187,898_(29.22%)	57,752,275,519_(20.68%)	82,006,818,638_(29.36%)	57,943,348,989_(20.75%)	43,574,875_(0.02%)	0.4142	86.8708X	69414.3
UP2115-B	1009107427	1,007,272,198_(99.82%)	36,624,124_(3.63%)	503878094	503394104	1005901651	1370547	148171557972	191237532	408	40.2349	43,586,733,505_(29.43%)	30,287,813,632_(20.45%)	43,857,717,044_(29.61%)	30,364,577,563_(20.5%)	1,742,339_(0%)	0.4095	46.054X	6922.55
UP2115-T	3051732942	3,044,568,185_(99.77%)	109,860,286_(3.6%)	1522563772	1522004413	3039824530	4743655	447399081256	569929834	383	40.127	131,555,306,091_(29.42%)	91,596,024,184_(20.48%)	132,312,971,792_(29.59%)	91,708,862,628_(20.51%)	5,242,390_(0%)	0.4099	139.0584X	57806
UP2116-B	940732650	921,213,927_(97.93%)	32,930,110_(3.5%)	462648768	458565159	916932000	4281927	134421124822	95569990	395	38.0469	39,402,539,059_(29.33%)	27,540,494,845_(20.5%)	39,640,789,800_(29.51%)	27,759,555,359_(20.66%)	14,194,470_(0.01%)	0.4116	41.7801X	3670.8
UP2116-T	1991981140	1,959,469,852_(98.37%)	70,488,406_(3.54%)	983798553	975671299	1950032021	9437831	285359782924	240764659	424	37.9847	83,284,052,933_(29.2%)	59,041,669,629_(20.7%)	83,620,352,346_(29.32%)	59,228,276,152_(20.77%)	60,631,123_(0.02%)	0.4147	88.6941X	70901.3
UP2117-B	1080679934	1,077,982,822_(99.75%)	39,311,698_(3.64%)	538731683	539251139	1075642872	2339950	158433510666	206102472	400	39.8813	46,420,342,750_(29.31%)	32,544,322,087_(20.55%)	46,696,477,129_(29.49%)	32,696,663,107_(20.65%)	1,915,672_(0%)	0.412	49.2435X	3782.49
UP2117-T	2464164059	2,453,582,010_(99.57%)	88,993,628_(3.61%)	1225000121	1228581889	2446276124	7305886	359946126916	455883066	380	40.3735	105,437,248,286_(29.31%)	74,041,067,517_(20.58%)	106,008,352,392_(29.46%)	74,291,625,042_(20.65%)	4,376,535_(0%)	0.4123	111.8767X	35758.8
UP2119-B	973193638	969,596,841_(99.63%)	35,066,927_(3.6%)	485858052	483738789	966500088	3096753	142649834604	110219859	402	39.3889	42,056,959,602_(29.5%)	29,038,137,683_(20.37%)	42,320,980,362_(29.68%)	29,162,327,154_(20.45%)	1,233,702_(0%)	0.4082	44.3377X	4514.15
UP2119-T	2223548236	2,214,129,566_(99.58%)	79,190,392_(3.56%)	1109561590	1104567976	2206769554	7360012	326036289011	270815097	378	39.8303	95,829,824,344_(29.41%)	66,847,795,867_(20.51%)	96,263,938,493_(29.54%)	66,939,987,114_(20.54%)	2,959,986_(0%)	0.4105	101.337X	43795.9
UP2123-B	1264026172	1,261,839,942_(99.83%)	45,171,670_(3.57%)	631134104	630705838	1260128675	1711267	185737311378	236742527	395	39.0022	54,629,848,181_(29.43%)	37,961,691,152_(20.45%)	54,927,074,194_(29.59%)	38,131,339,653_(20.54%)	2,170,584_(0%)	0.4099	57.73X	5196.61
UP2123-T	2132809347	2,128,405,297_(99.79%)	76,450,009_(3.58%)	1064543906	1063861391	2125445573	2959724	313472731776	385922559	403	39.5892	91,915,708,146_(29.33%)	64,450,544,271_(20.57%)	92,350,491,607_(29.47%)	64,615,891,491_(20.62%)	3,665,608_(0%)	0.4119	97.4321X	37181.8
UP2133-B	1010532033	960,537,074_(95.05%)	34,539,855_(3.42%)	482780445	477756629	954978278	5558796	140568506112	218535972	451	38.588	41,375,044,658_(29.45%)	28,598,322,224_(20.36%)	41,565,496,984_(29.59%)	28,930,576,972_(20.6%)	28,169,180_(0.02%)	0.4095	43.6908X	3109.21
UP2133-T	1884279523	1,823,127,139_(96.75%)	60,467,775_(3.21%)	917014332	906112807	1811216070	11911069	265628433766	284821727	460	38.3643	77,986,293,357_(29.38%)	54,457,291,316_(20.51%)	78,183,773,659_(29.45%)	54,836,409,022_(20.66%)	53,456,884_(0.02%)	0.4117	82.5613X	55694.3
UP2142-B	898085607	896,276,199_(99.8%)	32,441,227_(3.61%)	448259623	448016576	894967045	1309154	132221778507	162120507	421	40.0129	38,824,915,866_(29.38%)	27,102,362,400_(20.51%)	38,982,112,978_(29.5%)	27,248,347,971_(20.62%)	917,333_(0%)	0.4113	41.0965X	4312.03
UP2142-T	2015399415	2,009,400,527_(99.7%)	74,013,303_(3.67%)	1005059447	1004341080	2005950238	3450289	296729098935	366525308	396	40.8442	86,303,175,823_(29.1%)	61,733,115,606_(20.81%)	86,584,391,561_(29.19%)	61,977,326,400_(20.9%)	2,066,212_(0%)	0.4171	92.2279X	17615.5
UP2153-B	889280509	820,200,576_(92.23%)	29,155,664_(3.28%)	413911044	406289532	810822691	9377885	119367030515	121464291	429	37.2331	35,038,508,559_(29.37%)	24,426,695,944_(20.47%)	35,213,055,596_(29.52%)	24,624,609,366_(20.64%)	13,484,817_(0.01%)	0.4111	37.1011X	5074.85
UP2153-T	1917025633	1,577,280,509_(82.28%)	58,934,100_(3.07%)	794459242	782821267	1562460447	14820062	228641150611	345170018	343	37.217	66,521,528,912_(29.11%)	47,483,121,676_(20.78%)	66,784,382,057_(29.22%)	47,734,040,644_(20.89%)	32,331,162_(0.01%)	0.4167	71.0651X	38967.4
UP2159-B	847088447	844,964,228_(99.75%)	30,438,191_(3.59%)	422883443	422080785	843311416	1652812	124813865180	124524473	409	39.3549	36,754,701,112_(29.46%)	25,483,835,715_(20.43%)	36,879,808,176_(29.56%)	25,635,099,726_(20.55%)	1,014,435_(0%)	0.4098	38.794X	4073.87
UP2159-T	2551276070	2,545,086,017_(99.76%)	92,747,712_(3.64%)	1273746427	1271339590	2540422100	4663917	376621972741	387009301	399	40.3815	110,234,136,037_(29.28%)	77,693,357,897_(20.64%)	110,566,659,369_(29.37%)	77,964,627,482_(20.71%)	3,117,972_(0%)	0.4135	117.0598X	25646.1
UP2187-B	1048656622	1,046,015,048_(99.75%)	37,599,535_(3.59%)	523684058	522330990	1043763460	2251588	154396418266	154738763	439	39.8458	45,449,120,105_(29.45%)	31,516,948,647_(20.42%)	45,664,785,301_(29.59%)	31,693,360,927_(20.54%)	1,256,223_(0%)	0.4096	47.9887X	3782.62
UP2187-T	2199535589	2,193,716,159_(99.74%)	75,753,464_(3.44%)	1096335930	1097380229	2189391868	4324291	323088712147	363436017	336	39.7298	95,430,457,690_(29.55%)	65,710,126,465_(20.35%)	95,880,362,092_(29.69%)	65,936,894,936_(20.42%)	2,700,229_(0%)	0.4076	100.4208X	25793.7
UP2197-B	1017351422	1,015,357,566_(99.8%)	39,211,245_(3.85%)	507800030	507557536	1013567909	1789657	149444666089	144010406	420	40.2508	43,447,389,670_(29.09%)	31,034,052,581_(20.78%)	43,770,392,145_(29.31%)	31,108,159,451_(20.83%)	1,399,505_(0%)	0.4161	46.4497X	3511.99
UP2197-T	1534081700	1,530,169,584_(99.74%)	58,292,347_(3.8%)	765253692	764915892	1526802291	3367293	224648403140	215882415	388	40.662	65,352,293,094_(29.11%)	46,656,040,957_(20.78%)	65,850,424,953_(29.33%)	46,654,129,536_(20.78%)	2,098,649_(0%)	0.4156	69.8241X	21827.7
UP2213-B	941385054	939,655,420_(99.82%)	35,358,521_(3.76%)	470078089	469577331	938070352	1585068	138456783039	138527696	450	39.9376	40,298,329,155_(29.12%)	28,687,995,746_(20.73%)	40,578,198,067_(29.32%)	28,819,502,271_(20.83%)	1,284,722_(0%)	0.4156	43.0345X	3429.42
UP2213-T	1676207313	1,672,910,143_(99.8%)	63,002,004_(3.76%)	836666322	836243821	1670373474	2536669	246803837815	234447104	391	40.4876	71,552,805,883_(29.01%)	51,500,666,435_(20.88%)	71,955,322,028_(29.17%)	51,678,102,314_(20.95%)	2,317,444_(0%)	0.4183	76.7104X	23622.6
UP2258-B	855459686	851,717,235_(99.56%)	30,977,063_(3.62%)	426715108	425002127	848877780	2839455	125221506109	100233593	407	39.2171	36,895,126,092_(29.48%)	25,509,066,007_(20.38%)	37,112,989,527_(29.65%)	25,646,216,763_(20.49%)	1,122,039_(0%)	0.4087	38.9207X	2763.72
UP2258-T	1575804025	1,567,693,103_(99.49%)	56,948,996_(3.61%)	785850857	781842246	1561632075	6061028	230220543246	188493994	402	39.9539	67,598,983,521_(29.38%)	47,205,519,030_(20.51%)	68,012,580,114_(29.56%)	47,292,142,430_(20.55%)	2,133,063_(0%)	0.4107	71.556X	13998.4
UP2264-B	1140516892	1,134,339,323_(99.46%)	41,339,933_(3.62%)	568495670	565843653	1129512858	4826465	166518726838	136283335	394	39.5604	49,181,926,250_(29.55%)	33,805,343,605_(20.31%)	49,453,847,130_(29.71%)	33,997,415,863_(20.43%)	1,511,614_(0%)	0.4074	51.7565X	7780.67
UP2264-T	2190195163	2,176,616,457_(99.38%)	78,536,124_(3.59%)	1091127802	1085488655	2166884032	9732425	319558767977	253032158	416	40.1962	94,497,846,456_(29.59%)	64,804,722,525_(20.29%)	94,975,930,516_(29.73%)	65,129,579,676_(20.39%)	2,811,381_(0%)	0.4068	99.3237X	31412.8
UP2267-B	1174870115	1,173,204,560_(99.86%)	43,872,023_(3.73%)	586703808	586500752	1171816284	1388276	173569687582	234741988	419	39.8663	50,620,064,550_(29.18%)	35,881,255,556_(20.68%)	50,974,681,576_(29.38%)	36,004,535,566_(20.75%)	2,330,994_(0%)	0.4144	53.9481X	2903.68
UP2267-T	1973422447	1,969,739,083_(99.81%)	75,759,665_(3.84%)	984876131	984862952	1966805660	2933423	291224380040	392453252	422	40.2315	84,543,916,455_(29.05%)	60,708,625,941_(20.86%)	85,211,335,986_(29.27%)	60,611,225,069_(20.82%)	3,907,552_(0%)	0.4168	90.5169X	52934.4
UP2317-B	875079094	872,051,808_(99.65%)	31,905,278_(3.65%)	436435331	435616477	869821585	2230223	127887525055	127716117	357	39.407	37,603,568,685_(29.42%)	26,147,194,458_(20.46%)	37,791,892,747_(29.57%)	26,281,446,479_(20.56%)	2,145,734_(0%)	0.4102	39.7494X	4639.28
UP2317-T	1773174079	1,765,425,605_(99.56%)	65,472,502_(3.69%)	883751393	881674212	1759822413	5603192	259292801792	264749360	404	39.8235	75,612,612,119_(29.18%)	53,774,648,516_(20.75%)	75,911,505,648_(29.29%)	53,865,981,919_(20.78%)	3,927,057_(0%)	0.4153	80.5921X	39784.3
UP2330-B	973192718	964,908,944_(99.15%)	35,392,165_(3.64%)	480605365	484303579	958773886	6135058	140483395069	176940093	381	39.7913	41,285,333,095_(29.4%)	28,707,089,963_(20.44%)	41,553,449,693_(29.59%)	28,866,001,409_(20.56%)	1,706,153_(0%)	0.41	43.6644X	2391.74
UP2330-T	1734958059	1,730,481,675_(99.74%)	64,689,299_(3.73%)	865072604	865409071	1727159162	3322513	254343487245	317891352	431	40.0027	73,693,056,832_(28.99%)	53,220,998,653_(20.94%)	74,074,469,121_(29.14%)	53,186,316,803_(20.93%)	3,050,013_(0%)	0.4186	79.0538X	65119.1
UP2351-B	774846530	772,382,276_(99.68%)	27,364,753_(3.53%)	386575420	385806856	770447677	1934599	113358101531	107273319	340	39.2833	33,504,272,946_(29.57%)	22,998,994,508_(20.3%)	33,636,503,291_(29.69%)	23,164,399,736_(20.44%)	2,142,683_(0%)	0.4074	35.2334X	4391.95
UP2351-T	1972227026	1,960,926,642_(99.43%)	71,748,323_(3.64%)	981295846	979630796	1954925343	6001299	286616122936	278390963	323	39.8427	84,208,722,852_(29.39%)	58,836,136,430_(20.54%)	84,542,533,053_(29.51%)	58,886,473,465_(20.56%)	5,488,145_(0%)	0.4109	89.0846X	71875.5
UP2360-B	1101378534	1,096,978,821_(99.6%)	41,170,726_(3.74%)	549352331	547626490	1093619559	3359262	160857537341	157818492	407	39.4716	47,001,120,075_(29.23%)	33,185,195,748_(20.64%)	47,437,122,039_(29.51%)	33,147,366,700_(20.62%)	2,478,851_(0%)	0.4126	49.997X	5190.3
UP2360-T	2036561242	2,027,907,241_(99.58%)	77,589,173_(3.81%)	1015374899	1012532342	2021949669	5957572	297705997960	302955674	371	39.5306	86,314,274,982_(29.01%)	62,202,750,308_(20.91%)	87,002,578,302_(29.24%)	62,029,460,259_(20.85%)	4,752,108_(0%)	0.4175	92.5315X	37767
UP2370-B	839282852	837,378,245_(99.77%)	30,699,880_(3.66%)	418738952	418639293	836059029	1319216	123451670462	156270646	406	39.9941	36,165,717,071_(29.31%)	25,365,636,161_(20.56%)	36,390,504,351_(29.49%)	25,468,926,221_(20.64%)	1,439,504_(0%)	0.412	38.3706X	3546.86
UP2370-T	1757165917	1,753,219,715_(99.78%)	64,015,460_(3.64%)	877112010	876107705	1750517592	2702123	258038642908	326948183	400	40.6636	75,238,074,867_(29.17%)	53,492,274,458_(20.74%)	75,590,000,022_(29.31%)	53,593,237,069_(20.78%)	3,005,406_(0%)	0.4152	80.2023X	29874.6
UP2372-B	953818393	952,097,729_(99.82%)	35,587,146_(3.73%)	476097726	476000003	950819962	1277767	140317753629	176745674	382	39.8632	41,043,823,110_(29.27%)	28,887,995,825_(20.6%)	41,318,790,592_(29.46%)	28,995,919,037_(20.67%)	1,633,719_(0%)	0.4127	43.6129X	5574.4
UP2372-T	1964794112	1,960,038,200_(99.76%)	75,001,387_(3.82%)	980439832	979598368	1957096503	2941697	288993427046	377223342	404	40.39	83,972,173,973_(29.07%)	60,139,929,321_(20.82%)	84,467,216,711_(29.24%)	60,271,367,499_(20.87%)	3,364,315_(0%)	0.4169	89.8235X	25033.3
UP2380-B	1564067368	1,560,523,880_(99.77%)	58,746,627_(3.76%)	780136635	780387245	1557774875	2749005	229518921424	270005993	359	40.5912	67,156,388,841_(29.27%)	47,237,713,222_(20.59%)	67,591,807,346_(29.46%)	47,418,174,199_(20.67%)	1,091,675_(0%)	0.4126	71.3379X	9859.65
UP2380-T	1687549854	1,683,054,012_(99.73%)	63,012,110_(3.73%)	842335924	840718088	1679763446	3290566	247468249259	265456346	377	40.5184	72,582,653,127_(29.34%)	50,822,572,208_(20.55%)	72,939,857,169_(29.49%)	51,015,719,537_(20.62%)	1,299,017_(0%)	0.4117	76.9169X	12250.8
UP2396-B	1126446400	1,124,598,426_(99.84%)	40,961,750_(3.64%)	562662049	561936377	1123080899	1517527	165801166544	170326744	415	39.5806	48,795,728,600_(29.44%)	33,827,848,534_(20.41%)	49,031,429,119_(29.59%)	34,068,095,021_(20.56%)	1,242,826_(0%)	0.4097	51.5335X	6447.97
UP2396-T	2900121701	2,889,931,941_(99.65%)	102,926,632_(3.55%)	1445318661	1444613280	2884490190	5441751	426243121801	440705001	377	40.1013	125,722,550,958_(29.51%)	86,766,831,148_(20.36%)	126,310,080,700_(29.65%)	87,262,696,089_(20.48%)	3,245,063_(0%)	0.4085	132.4828X	33996.5

## Sheet: kccg_qc
ID	M001		Sample	Target Coverage	Illumina_coverage	wgs_mean_coverage	wgs_Median_Coverage	wgsmetrics_PCT_EXC_DUPE	isaac_Yield_(MBases)	isaac_Q30_mean
1	FD03042918	15126_Blood	190411_FD03042918	30	36.5484	32.2314	33	0.132589	136944	94.04
2	FD03042919	15126_Tissue	190411_FD03042919	60	62.7095	56.5932	59	0.128974	233212	94.405
3	FD03042926	11590_Blood	190411_FD03042926	30	34.1511	30.1323	31	0.12778	125822	94.225
4	FD03042927	11590_Tissue	190411_FD03042927	60	66.0021	58.5188	60	0.128498	238652	94.095
5	FD03042934	11141_Blood	190411_FD03042934	30	37.9704	33.8494	35	0.13314	137063	93.555
6	FD03042935	11141_Tissue	190411_FD03042935	60	87.2813	79.9745	83	0.141313	310959	93.095
7	FD03042942	17392_Blood	190411_FD03042942	30	38.6743	34.3795	35	0.128367	138167	93.385
8	FD03042943	17392_Tissue	190411_FD03042943	60	78.6484	69.9372	72	0.13195	280374	93.52
9	FD03042950	UP2213_Blood	190411_FD03042950	30	37.8659	33.313	34	0.135966	135708	93.005
10	FD03042958	UP2213_Tissue	190411_FD03042958	60	67.4472	60.1877	61	0.129528	241022	93.83
11	FD03042966	UP2197_Blood	190411_FD03042966	30	40.7992	35.9622	37	0.130089	146807	93.435
12	FD03042974	UP2197_Tissue	190411_FD03042974	60	60.6409	n.a.	n.a.	n.a.	222566	n.a.
13	FD03042982	UP2049_Blood	190411_FD03042982	30	42.5701	37.6025	39	0.131719	151544	93.02
14	FD03042990	UP2049_Tissue	190411_FD03042990	60	92.1365	80.9205	84	0.130425	335679	93.61
15	FD03042998	UP2063_Blood	190411_FD03042998	30	41.1185	36.4039	37	0.127491	146526	93.25
16	FD03043006	UP2063_Tissue	190411_FD03043006	60	75.0827	66.5178	68	0.127117	270188	93.705
ID	M002		Sample	Target Coverage	Illumina_coverage	wgs_mean_coverage	wgs_Median_Coverage	wgsmetrics_PCT_EXC_DUPE	isaac_Yield_(MBases)	isaac_Q30_mean
17	FD03042920	16004_Blood	190509_FD03042920	30	36.2451	32.0177	33	0.130221	128574	90.84
18	FD03042928	16004_Tissue	190509_FD03042928	60	73.8272	66.2955	69	0.134744	266510	91.175
19	FD03042936	16263_Blood	190509_FD03042936	30	35.0164	30.7794	32	0.13155	124922	90.69
20	FD03042944	16263_Tissue	190509_FD03042944	60	79.1426	68.9215	72	0.136935	285331	89.89
21	FD03042951	14365_Blood	190509_FD03042951	30	41.5232	36.4348	38	0.138688	150100	90.405
22	FD03042952	14365_Tissue	190509_FD03042952	60	76.9313	69.4927	72	0.135588	275617	90.415
23	FD03042959	16000_Blood	190509_FD03042959	30	43.1602	37.9485	39	0.134992	155153	90.345
24	FD03042960	16000_Tissue	190509_FD03042960	60	76.9009	67.5106	71	0.134434	277466	89.91
25	FD03042967	UP2159_Blood	190509_FD03042967	30	33.9611	29.6053	31	0.135098	122500	90.32
26	FD03042968	UP2159_Tissue	190509_FD03042968	60	102.78	91.119	95	0.141128	372928	90.505
27	FD03042975	UP2187_Blood	190509_FD03042975	30	42.2027	36.7289	38	0.136072	151570	89.905
28	FD03042976	UP2187_Tissue	190509_FD03042976	60	83.6445	74.4249	75	0.155384	319633	91.655
29	FD03042983	UP2035_Blood	190509_FD03042983	30	44.3675	38.7548	40	0.148465	164431	91.125
30	FD03042991	UP2035_Tissue	190509_FD03042991	60	91.0975	79.1379	83	0.145985	346093	91.435
31	FD03042999	UP2041_Blood	190509_FD03042999	30	45.5451	40.1196	42	0.143197	166629	91.175
32	FD03043007	UP2041_Tissue	190509_FD03043007	60	69.0827	60.5861	63	0.146185	259573	91.24
ID	M003		Sample Name	Illumina_Coverage	Median Coverage	Bases ≥ 30X	% Dups	% GC	M Seqs	M Clusters	Mb Yield ≥ Q30	% R1 Yield ≥ Q30	% R2 Yield ≥ Q30	% Perfect Index
33	FD03042921	11926_Blood	190509_FD03042921	39.5X	36.0X	0.77	0.142	0.4	474.7	474.7	128173	0.91	0.879	0.945
34	FD03042929	11926_Tissue	190509_FD03042929	63.4X	57.0X	0.92	0.163	0.4	765.5	765.5	206381	0.908	0.878	0.951
35	FD03042937	17135_Blood	190509_FD03042937	38.3X	35.0X	0.73	0.144	0.4	458.9	458.9	123843	0.909	0.878	0.947
36	FD03042945	17135_Tissue	190509_FD03042945	94.3X	83.0X	0.96	0.214	0.4	1144	1144	300422	0.905	0.834	0.964
37	FD03042953	17212_Blood	190509_FD03042953	38.1X	34.0X	0.72	0.13	0.4	447.4	447.4	119763	0.908	0.865	0.96
38	FD03042961	17212_Tissue	190509_FD03042961	63.4X	58.0X	0.93	0.141	0.4	743.1	743.1	199141	0.909	0.866	0.953
39	FD03042969	11119_Blood	190509_FD03042969	40.6X	37.0X	0.79	0.136	0.4	479.2	479.2	128839	0.91	0.871	0.954
40	FD03042977	11119_Tissue	190509_FD03042977	66.5X	60.0X	0.93	0.149	0.4	774	774	207108	0.908	0.864	0.956
41	FD03042984	UP2258_Blood	190509_FD03042984	35.1X	31.0X	0.59	0.132	0.4	413.1	413.1	110701	0.908	0.866	0.957
42	FD03042985	UP2258_Tissue	190509_FD03042985	64.2X	55.0X	0.89	0.165	0.41	766.4	766.4	205108	0.907	0.866	0.965
43	FD03042992	UP2264_Blood	190509_FD03042992	46.3X	41.0X	0.86	0.167	0.4	557.1	557.1	148961	0.908	0.863	0.961
44	FD03042993	UP2264_Tissue	190509_FD03042993	89.8X	81.0X	0.96	0.197	0.4	1067.1	1067.1	284530	0.905	0.861	0.755
45	FD03043000	UP2048_Blood	190509_FD03043000	47.1X	42.0X	0.87	0.143	0.4	558.8	558.8	149743	0.907	0.868	0.757
46	FD03043001	UP2048_Tissue	190509_FD03043001	77.6X	n.a.	n.a.	n.a.	n.a.	n.a.	n.a.	n.a.	0.916	0.879	n.a.
47	FD03043008	UP2119_Blood	190509_FD03043008	40.0X	36.0X	0.77	0.146	0.4	469	469	125678	0.907	0.867	0.744
48	FD03043009	UP2119_Tissue	190509_FD03043009	89.9X	82.0X	0.96	0.19	0.41	1075.1	1075.1	288203	0.907	0.869	0.764
ID	M004		Sample Name	Illumina_Coverage	Median Coverage	Bases ≥ 30X	% Dups	% GC	M Seqs	M Clusters	Mb Yield ≥ Q30	% R1 Yield ≥ Q30	% R2 Yield ≥ Q30	% Perfect Index
49	FD03042922	6068_Blood	190512_FD03042922	47.2X	43.0X	0.88	0.195	0.41	621.8	621.8	175632	0.945	0.925	0.975
50	FD03042923	6068_Tissue	190512_FD03042923	74.3X	68.0X	0.95	0.216	0.41	980.3	980.3	276546	0.945	0.923	0.981
51	FD03042930	11114_Blood	190512_FD03042930	50.0X	46.0X	0.89	0.201	0.41	656.2	656.2	186069	0.948	0.93	0.982
52	FD03042931	11114_Tissue	190512_FD03042931	82.6X	78.0X	0.96	0.215	0.4	1089	1089	308399	0.948	0.928	0.982
53	FD03042938	11129_Blood	190512_FD03042938	40.0X	36.0X	0.79	0.188	0.41	523.8	523.8	148643	0.945	0.934	0.981
54	FD03042939	11129_Tissue	190512_FD03042939	74.1X	67.0X	0.94	0.196	0.4	949.5	949.5	268968	0.944	0.932	0.982
55	FD03042946	11830_Blood	190512_FD03042946	41.7X	38.0X	0.83	0.181	0.41	532	532	150918	0.945	0.933	0.977
56	FD03042947	11830_Tissue	190512_FD03042947	68.2X	64.0X	0.94	0.195	0.41	870.4	870.4	246281	0.944	0.93	0.978
57	FD03042954	14261_Blood	190512_FD03042954	36.7X	33.0X	0.69	0.185	0.41	467.6	467.6	132276	0.943	0.93	0.976
58	FD03042962	14261_Tissue	190512_FD03042962	76.1X	71.0X	0.94	0.2	0.41	965.6	965.6	273445	0.944	0.931	0.982
59	FD03042970	UP2267_Blood	190512_FD03042970	44.5X	41.0X	0.86	0.187	0.41	564	564	159597	0.943	0.931	0.982
60	FD03042978	UP2267_Tissue	190512_FD03042978	74.7X	69.0X	0.95	0.211	0.41	950.2	950.2	268068	0.942	0.927	0.982
61	FD03042986	UP2004_Blood	190512_FD03042986	43.9X	40.0X	0.85	0.185	0.41	558	558	158098	0.948	0.928	0.981
62	FD03042994	UP2004_Tissue	190512_FD03042994	95.2X	88.0X	0.96	0.225	0.41	1213.5	1213.5	343821	0.948	0.928	0.984
63	FD03043002	12571_Blood	190512_FD03043002	37.2X	34.0X	0.7	0.178	0.41	473	473	133708	0.948	0.925	0.979
64	FD03043010	12571_Tissue	190512_FD03043010	76.5X	70.0X	0.95	0.216	0.41	976.9	976.9	276864	0.948	0.929	0.981
ID	M005		Sample Name	Illumina_Coverage	Median Coverage	Bases ≥ 30X	% Dups	% GC	M Seqs	M Clusters	Mb Yield ≥ Q30	% R1 Yield ≥ Q30	% R2 Yield ≥ Q30	% Perfect Index
65	FD03042924	16311_Blood	190512_FD03042924	36.1X	n.a.	n.a.	n.a.	n.a.	n.a.	n.a.	n.a.	0.901	0.87	n.a.
66	FD03042932	16311_Tissue	190512_FD03042932	71.7X	n.a.	n.a.	n.a.	n.a.	n.a.	n.a.	n.a.	0.9	0.861	n.a.
67	FD03042940	11265_Blood	190512_FD03042940	36.3X	n.a.	n.a.	n.a.	n.a.	n.a.	n.a.	n.a.	0.9	0.869	n.a.
68	FD03042948	11265_Tissue	190512_FD03042948	72.8X	n.a.	n.a.	n.a.	n.a.	n.a.	n.a.	n.a.	0.898	0.858	n.a.
69	FD03042955	10651_Blood	190512_FD03042955	35.8X	31.0X	0.58	0.152	0.4	471.6	471.6	123534	0.872	0.863	0.945
70	FD03042956	10651_Tissue	190512_FD03042956	73.8X	n.a.	n.a.	n.a.	n.a.	n.a.	n.a.	n.a.	0.897	0.878	n.a.
71	FD03042963	11532_Blood	190512_FD03042963	76.8X	67.0X	0.94	0.183	0.41	1048.6	1048.6	274504	0.87	0.863	0.947
72	FD03042964	11532_Tissue	190512_FD03042964	86.7X	78.0X	0.96	0.17	0.4	1052.4	1052.4	274545	0.871	0.857	0.946
73	FD03042971	UP2351_Blood	190512_FD03042971	30.1X	26.0X	0.3	0.137	0.4	375	375	98329.4	0.874	0.863	0.915
74	FD03042972	UP2351_Tissue	190512_FD03042972	74.8X	61.0X	0.92	0.18	0.41	955.4	955.4	249319	0.869	0.859	0.953
75	FD03042979	UP2317_Blood	190512_FD03042979	33.9X	n.a.	n.a.	n.a.	n.a.	n.a.	n.a.	n.a.	0.897	0.88	n.a.
76	FD03042980	UP2317_Tissue	190512_FD03042980	70.0X	n.a.	n.a.	n.a.	n.a.	n.a.	n.a.	n.a.	0.897	0.873	n.a.
77	FD03042987	UP2050_Blood	190512_FD03042987	33.2X	29.0X	0.48	0.138	0.41	406.4	406.4	105691	0.873	0.849	0.925
78	FD03042995	UP2050_Tissue	190512_FD03042995	64.1X	55.0X	0.91	0.135	0.41	759	759	196158	0.873	0.839	0.914
79	FD03043003	UP2360_Blood	190512_FD03043003	43.6X	n.a.	n.a.	n.a.	n.a.	n.a.	n.a.	n.a.	0.898	0.865	n.a.
80	FD03043011	UP2360_Tissue	190512_FD03043011	79.5X	n.a.	n.a.	n.a.	n.a.	n.a.	n.a.	n.a.	0.899	0.871	n.a.
ID	M006		Sample Name	Illumina_Coverage	Median Coverage	Bases ≥ 30X	% Dups	% GC	M Seqs	M Clusters	Mb Yield ≥ Q30	% R1 Yield ≥ Q30	% R2 Yield ≥ Q30	% Perfect Index
81	FD03042925	14862_Blood	190605_FD03042925	34.4X	32.0X	0.62	0.165	0.41	443.5	443.5	123715	0.932	0.915	0.959
82	FD03042933	14862_Tissue	190605_FD03042933	67.8X	64.0X	0.94	0.199	0.4	922.3	922.3	257759	0.933	0.918	0.975
83	FD03042941	13518_Blood	190605_FD03042941	38.5X	35.0X	0.76	0.181	0.41	515.8	515.8	144205	0.934	0.918	0.976
84	FD03042949	13518_Tissue	190605_FD03042949	78.7X	73.0X	0.95	0.215	0.41	1055	1055	295074	0.933	0.919	0.985
85	FD03042957	13019_Blood	190605_FD03042957	36.1X	n.a.	n.a.	n.a.	n.a.	n.a.	n.a.	n.a.	0.931	0.913	n.a.
86	FD03042965	13019_Tissue	190605_FD03042965	73.7X	68.0X	0.95	0.203	0.41	948.9	948.9	263014	0.932	0.904	0.978
87	FD03042973	16176_Blood	190605_FD03042973	44.2X	41.0X	0.86	0.18	0.41	560.9	560.9	154919	0.931	0.898	0.974
88	FD03042981	16176_Tissue	190605_FD03042981	77.6X	72.0X	0.95	0.2	0.41	975.7	975.7	269740	0.931	0.9	0.973
89	FD03042988	UP2372_Blood	190605_FD03042988	35.9X	32.0X	0.65	0.181	0.41	462.4	462.4	128178	0.932	0.904	0.963
90	FD03042989	UP2372_Tissue	190605_FD03042989	74.2X	67.0X	0.95	0.202	0.41	954.4	954.4	263820	0.93	0.9	0.972
91	FD03042996	UP2370_Blood	190605_FD03042996	32.0X	29.0X	0.47	0.167	0.41	407.4	407.4	112553	0.931	0.899	0.973
92	FD03042997	UP2370_Tissue	190605_FD03042997	69.0X	63.0X	0.93	0.207	0.41	883.1	883.1	244218	0.93	0.901	0.982
93	FD03043004	UP2115_Blood	190605_FD03043004	38.4X	35.0X	0.75	0.18	0.41	488	488	134856	0.931	0.899	0.975
94	FD03043005	UP2115_Tissue	190605_FD03043005	115.1X	106.0X	0.97	0.234	0.41	1480.8	1480.8	410113	0.931	0.904	0.973
95	FD03043012	UP2123_Blood	190605_FD03043012	48.1X	44.0X	0.88	0.179	0.41	611.3	611.3	169120	0.93	0.902	0.967
96	FD03043013	UP2123_Tissue	190605_FD03043013	82.3X	76.0X	0.96	0.2	0.41	1031.6	1031.6	285161	0.93	0.9	0.966
ID	M007		Sample Name	Illumina_Coverage	Median Coverage	Bases ≥ 30X	% Dups	% GC	M Seqs	M Clusters	Mb Yield ≥ Q30	% R1 Yield ≥ Q30	% R2 Yield ≥ Q30	% Perfect Index
97	FD09250334	16677_Blood	190605_FD09250334	46.8X	43.0X	0.88	0.185	0.41	594.4	594.4	164928	0.933	0.904	0.974
98	FD09250342	16677_Tissue	190605_FD09250342	96.4X	89.0X	0.96	0.217	0.41	1228.2	1228.2	338019	0.93	0.893	0.975
99	FD09250350	16995_Blood	190605_FD09250350	34.6X	32.0X	0.62	0.164	0.41	436.2	436.2	120309	0.932	0.895	0.975
100	FD09250358	16995_Tissue	190605_FD09250358	74.1X	68.0X	0.95	0.203	0.41	945.6	945.6	261649	0.932	0.9	0.983
101	FD09250366	16599_Blood	190605_FD09250366	39.2X	36.0X	0.78	0.174	0.41	501.7	501.7	139212	0.934	0.904	0.979
102	FD09250374	16599_Tissue	190605_FD09250374	61.0X	56.0X	0.92	0.2	0.41	773	773	214222	0.934	0.902	0.978
103	FD09250382	10734_Blood	190605_FD09250382	48.0X	43.0X	0.88	0.194	0.41	612	612	168946	0.932	0.896	0.977
104	FD09250390	10734_Tissue	190605_FD09250390	68.7X	63.0X	0.94	0.192	0.41	857.7	857.7	236388	0.932	0.893	0.971
105	FD09250397	11874_Blood	190605_FD09250397	43.1X	40.0X	0.85	0.167	0.41	539.5	539.5	149245	0.933	0.899	0.969
106	FD09250398	11874_Tissue	190605_FD09250398	82.4X	76.0X	0.96	0.204	0.41	1035.9	1035.9	285975	0.932	0.896	0.975
107	FD09250405	UP2142_Blood	190605_FD09250405	34.7X	31.0X	0.61	0.174	0.41	433.3	433.3	119762	0.933	0.897	0.975
108	FD09250406	UP2142_Tissue	190605_FD09250406	77.5X	70.0X	0.94	0.207	0.41	977.8	977.8	271215	0.934	0.903	0.98
109	FD09250413	UP2089_Blood	190605_FD09250413	31.1X	28.0X	0.42	0.161	0.41	389.2	389.2	107578	0.933	0.897	0.975
110	FD09250414	UP2089_Tissue	190605_FD09250414	75.5X	70.0X	0.94	0.23	0.41	989.6	989.6	274888	0.934	0.905	0.978
111	FD09250421	UP2037_Blood	190605_FD09250421	51.0X	46.0X	0.89	0.23	0.41	666.6	666.6	184897	0.934	0.903	0.977
112	FD09250422	UP2037_Tissue	190605_FD09250422	82.3X	76.0X	0.96	0.215	0.41	1065.4	1065.4	295536	0.934	0.903	0.975
ID	M008		Sample Name	Illumina_Coverage	Median Coverage	Bases ≥ 30X	% Dups	% GC	M Seqs	M Clusters	Mb Yield ≥ Q30	% R1 Yield ≥ Q30	% R2 Yield ≥ Q30	% Perfect Index
113	FD09250333	14919_Blood	190606_FD09250333	33.2X	30.0X	0.54	0.153	0.41	403.5	403.5	110855	0.929	0.89	0.969
114	FD09250341	14919_Tissue	190606_FD09250341	70.5X	65.0X	0.94	0.187	0.41	872.9	872.9	239614	0.928	0.89	0.972
115	FD09250349	10764_Blood	190606_FD09250349	32.1X	29.0X	0.49	0.15	0.4	393.7	393.7	107930	0.929	0.887	0.974
116	FD09250357	10764_Tissue	190606_FD09250357	71.5X	68.0X	0.94	0.17	0.4	884.3	884.3	243230	0.93	0.892	0.981
117	FD09250364	12103_Blood	190606_FD09250364	33.8X	31.0X	0.56	0.157	0.41	417.5	417.5	114376	0.928	0.886	0.975
118	FD09250365	12103_Tissue	190606_FD09250365	114.6X	106.0X	0.97	0.294	0.41	1593.3	1593.3	438025	0.928	0.893	0.984
119	FD09250372	UP2380_Blood	190606_FD09250372	58.7X	54.0X	0.91	0.198	0.41	760.2	760.2	209904	0.929	0.899	0.982
120	FD09254001	UP2380_Tissue	190630_FD09254001	65.8X	n.a.	n.a.	n.a.	n.a.	n.a.	n.a.	n.a.	0.927	0.893	n.a.
121	FD09250380	11099_Blood	190606_FD09250380	50.0X	46.0X	0.89	0.167	0.41	619.9	619.9	170668	0.928	0.895	0.969
122	FD09250381	11099_Tissue	190606_FD09250381	82.6X	76.0X	0.96	0.205	0.41	1040.5	1040.5	286301	0.927	0.895	0.972
123	FD09250388	UP2092_Blood	190606_FD09250388	40.0X	36.0X	0.79	0.168	0.4	515.1	515.1	142340	0.93	0.901	0.978
124	FD09250389	UP2092_Tissue	190606_FD09250389	72.2X	67.0X	0.94	0.192	0.4	919.1	919.1	254153	0.929	0.902	0.983
125	FD09250396	UP2093_Blood	190606_FD09250396	38.0X	35.0X	0.74	0.158	0.4	468.7	468.7	128423	0.926	0.888	0.975
126	FD09250404	UP2093_Tissue	190606_FD09250404	77.1X	71.0X	0.95	0.192	0.4	955	955	262714	0.929	0.893	0.98
127	FD09250412	UP2109_Blood	190606_FD09250412	48.3X	44.0X	0.88	0.17	0.41	602.3	602.3	165504	0.929	0.891	0.977
128	FD09250420	UP2109_Tissue	190606_FD09250420	77.2X	71.0X	0.95	0.189	0.41	955.8	955.8	261950	0.928	0.886	0.971
ID	M009		Sample Name	Illumina_Coverage	Median Coverage	Bases ≥ 30X	% Dups	% GC	M Seqs	M Clusters	Mb Yield ≥ Q30	% R1 Yield ≥ Q30	% R2 Yield ≥ Q30	% Perfect Index
129	FD09250331	17827_Blood	190607_FD09250331	37.3X	34.0X	0.73	0.14	0.41	448.9	448.9	124400	0.932	0.904	0.974
130	FD09250332	17827_Tissue	190607_FD09250332	68.7X	64.0X	0.94	0.17	0.41	828.9	828.9	229256	0.93	0.901	0.977
131	FD09250339	15178_Blood	190607_FD09250339	35.2X	32.0X	0.65	0.142	0.41	421.6	421.6	116796	0.932	0.902	0.97
132	FD09250340	15178_Tissue	190607_FD09250340	63.4X	58.0X	0.93	0.168	0.41	757.1	757.1	209382	0.93	0.901	0.977
133	FD09250347	12596_Blood	190607_FD09250347	28.9X	26.0X	0.31	0.133	0.41	348.8	348.8	96668.6	0.931	0.904	0.966
134	FD09250348	12596_Tissue	190607_FD09250348	100.6X	95.0X	0.96	0.18	0.4	1217.5	1217.5	338233	0.933	0.907	0.982
135	FD09250355	18210_Blood	190607_FD09250355	38.0X	35.0X	0.75	0.138	0.41	453.4	453.4	125352	0.93	0.901	0.977
136	FD09250356	18210_Tissue	190607_FD09250356	81.7X	76.0X	0.96	0.174	0.41	978.9	978.9	270355	0.93	0.899	0.979
137	FD09250363	UP2101_Blood	190607_FD09250363	39.7X	36.0X	0.78	0.151	0.4	478.9	478.9	132200	0.931	0.897	0.976
138	FD09250371	UP2101_Tissue	190607_FD09250371	78.0X	70.0X	0.95	0.176	0.4	945.6	945.6	260670	0.93	0.895	0.98
139	FD09250379	UP2100_Blood	190607_FD09250379	54.1X	49.0X	0.9	0.191	0.41	682.9	682.9	188184	0.931	0.894	0.976
140	FD09250387	UP2100_Tissue	190607_FD09250387	95.9X	89.0X	0.96	0.186	0.41	1161.6	1161.6	320242	0.93	0.896	0.98
141	FD09250395	UP2396_Blood	190607_FD09250395	44.9X	41.0X	0.86	0.146	0.4	542.6	542.6	149809	0.931	0.898	0.968
142	FD09250403	UP2396_Tissue	190607_FD09250403	118.3X	108.0X	0.96	0.238	0.41	1479.3	1479.3	409447	0.932	0.901	0.984
143	FD09250411	UP2103_Blood	190607_FD09250411	34.9X	32.0X	0.62	0.136	0.4	420.1	420.1	115939	0.93	0.897	0.979
144	FD09250419	UP2103_Tissue	190607_FD09250419	79.8X	73.0X	0.95	0.178	0.4	963.3	963.3	266160	0.932	0.898	0.982
ID	M010		Sample Name	Illumina_Coverage	Median Coverage	Bases ≥ 30X	% Dups	% GC	M Seqs	M Clusters	Mb Yield ≥ Q30	% R1 Yield ≥ Q30	% R2 Yield ≥ Q30	% Perfect Index
145	FD09250330	UP2330_Blood	190702_FD09250330	36.1X	32.0X	0.63	0.207	0.41	497.3	497.3	136102	0.922	0.89	0.97
146	FD09250338	UP2330_Tissue	190702_FD09250338	68.5X	57.0X	0.88	0.204	0.42	874.8	874.8	240927	0.932	0.892	0.972
147	FD09250346	UP2117_Blood	190702_FD09250346	40.7X	37.0X	0.8	0.179	0.41	522.3	522.3	144338	0.932	0.898	0.965
148	FD09250354	UP2117_Tissue	190702_FD09250354	98.0X	90.0X	0.96	0.217	0.41	1281.4	1281.4	353672	0.931	0.897	0.977
149	FD09250362	12333_Blood	190702_FD09250362	33.7X	30.0X	0.54	0.164	0.41	431.2	431.2	118722	0.931	0.892	0.975
150	FD09250370	12333_Tissue	190702_FD09250370	75.8X	69.0X	0.95	0.201	0.41	979.2	979.2	270371	0.933	0.896	0.977
151	FD09250378	N0001_Blood	190702_FD09250378	37.1X	34.0X	0.71	0.168	0.41	475.6	475.6	131761	0.93	0.905	0.973
152	FD09250386	N0001_Tissue	190702_FD09250386	77.1X	71.0X	0.95	0.205	0.41	970.9	970.9	268145	0.928	0.901	0.977
153	FD09250393	N0002_Blood	190702_FD09250393	39.8X	36.0X	0.79	0.167	0.41	493.7	493.7	136296	0.929	0.9	0.966
154	FD09250394	N0002_Tissue	190702_FD09250394	62.5X	57.0X	0.93	0.182	0.41	773.8	773.8	213080	0.926	0.897	0.972
155	FD09250401	N0007_Blood	190702_FD09250401	32.8X	30.0X	0.52	0.158	0.41	405.4	405.4	111832	0.927	0.9	0.964
156	FD09250402	N0007_Tissue	190702_FD09250402	67.1X	61.0X	0.94	0.183	0.41	830.9	830.9	228758	0.926	0.897	0.977
157	FD09250409	N0010_Blood	190702_FD09250409	37.6X	34.0X	0.73	0.156	0.41	467.2	467.2	128878	0.927	0.9	0.976
158	FD09250410	N0010_Tissue	190702_FD09250410	69.3X	63.0X	0.94	0.183	0.41	860.4	860.4	236945	0.927	0.897	0.976
159	FD09250417	N0015_Blood	190702_FD09250417	43.4X	40.0X	0.85	0.167	0.41	548.2	548.2	151897	0.936	0.9	0.972
160	FD09250418	N0015_Tissue	190702_FD09250418	88.4X	81.0X	0.96	0.219	0.41	1121.4	1121.4	310712	0.935	0.9	0.977
ID	M012		Sample Name	Illumina_Coverage	Median Coverage	Bases ≥ 30X	% Dups	% GC	M Seqs	M Clusters	Mb Yield ≥ Q30	% R1 Yield ≥ Q30	% R2 Yield ≥ Q30	% Perfect Index
161	FD09254942	N0031_Blood	190729_FD09254942	39.3X	35.0X	0.76	0.184	0.41	500.7	500.7	137616	0.936	0.884	0.946
162	FD09254950	N0031_Tissue	190729_FD09254950	64.6X	57.0X	0.93	0.22	0.41	861.7	861.7	235913	0.931	0.882	0.969
163	FD09254958	N0048_Blood	190729_FD09254958	43.7X	39.0X	0.83	0.187	0.41	578.2	578.2	158148	0.922	0.89	0.965
164	FD09254966	N0048_Tissue	190729_FD09254966	76.9X	69.0X	0.95	0.225	0.41	1002.9	1002.9	274870	0.929	0.886	0.962
165	FD09254974	N0053_Blood	190729_FD09254974	28.4X	25.0X	0.26	0.171	0.41	363.5	363.5	100091	0.935	0.888	0.947
166	FD09254982	N0053_Tissue	190729_FD09254982	64.7X	58.0X	0.92	0.215	0.41	868.9	868.9	240502	0.935	0.898	0.952
167	FD09254990	N0055_Blood	190729_FD09254990	41.3X	37.0X	0.8	0.198	0.41	552.8	552.8	152647	0.934	0.895	0.961
168	FD09254997	N0055_Tissue	190729_FD09254997	55.1X	50.0X	0.9	0.204	0.41	724.3	724.3	200090	0.936	0.894	0.971
169	FD09254998	N0056_Blood	190729_FD09254998	33.7X	30.0X	0.53	0.185	0.41	440.4	440.4	121551	0.936	0.892	0.963
170	FD09255005	N0056_Tissue	190729_FD09255005	73.4X	68.0X	0.94	0.214	0.41	944.7	944.7	260501	0.932	0.895	0.97
171	FD09255006	N0059_Blood	190729_FD09255006	32.1X	29.0X	0.46	0.168	0.41	400.9	400.9	110533	0.931	0.895	0.963
172	FD09255013	N0059_Tissue	190729_FD09255013	64.9X	60.0X	0.93	0.183	0.41	806.5	806.5	221358	0.93	0.888	0.96
173	FD09255014	N0061_Blood	190729_FD09255014	25.9X	23.0X	0.15	0.167	0.41	320.7	320.7	88253.1	0.93	0.892	0.945
174	FD09255021	N0061_Tissue	190729_FD09255021	54.7X	50.0X	0.9	0.204	0.41	700	700	192226	0.93	0.888	0.945
175	FD09255022	N0067_Blood	190729_FD09255022	29.8X	27.0X	0.34	0.161	0.41	368.6	368.6	101217	0.929	0.889	0.95
176	FD09255029	N0067_Tissue	190729_FD09255029	67.5X	61.0X	0.93	0.198	0.41	856.3	856.3	233987	0.928	0.882	0.969
ID	M013		Sample Name	Illumina_Coverage	Median Coverage	Bases ≥ 30X	% Dups	% GC	M Seqs	M Clusters	Mb Yield ≥ Q30	% R1 Yield ≥ Q30	% R2 Yield ≥ Q30	% Perfect Index
177	FD09254006	N0073_Blood	190730_FD09254006	32.9X	30.0X	0.51	0.17	0.41	411.1	411.1	114376	0.939	0.903	0.949
178	FD09254014	N0073_Tissue	190730_FD09254014	80.0X	72.0X	0.95	0.238	0.41	1054	1054	289028	0.94	0.876	0.979
179	FD09254022	N0077_Blood	190730_FD09254022	39.4X	36.0X	0.76	0.172	0.41	494.6	494.6	137168	0.942	0.894	0.974
180	FD09254943	N0077_Tissue	190730_FD09254943	69.4X	63.0X	0.94	0.192	0.41	874.2	874.2	240884	0.94	0.885	0.973
181	FD09254951	N0078_Blood	190730_FD09254951	37.0X	33.0X	0.69	0.177	0.41	466.2	466.2	129352	0.942	0.896	0.971
182	FD09254959	N0078_Tissue	190730_FD09254959	75.6X	n.a.	n.a.	n.a.	n.a.	n.a.	n.a.	n.a.	0.934	0.897	n.a.
183	FD09254967	N0081_Blood	190730_FD09254967	27.2X	24.0X	0.21	0.165	0.41	339.8	339.8	93878.8	0.94	0.889	0.972
184	FD09254975	N0081_Tissue	190730_FD09254975	24.7X	21.0X	0.11	0.187	0.41	318.3	318.3	85161.4	0.93	0.841	0.972
185	FD09254983	N0084_Blood	190730_FD09254983	36.2X	32.0X	0.64	0.184	0.41	458.1	458.1	127030	0.942	0.895	0.974
186	FD09254991	N0084_Tissue	190730_FD09254991	83.3X	76.0X	0.95	0.231	0.41	1145.1	1145.1	320471	0.944	0.909	0.983
187	FD09254999	N0085_Blood	190730_FD09254999	42.4X	39.0X	0.83	0.191	0.41	558.8	558.8	155854	0.943	0.904	0.978
188	FD09255007	N0085_Tissue	190730_FD09255007	70.5X	65.0X	0.94	0.211	0.41	974.8	974.8	272036	0.944	0.904	0.979
189	FD09255015	N0087_Blood	190730_FD09255015	44.4X	40.0X	0.86	0.191	0.41	575.1	575.1	160184	0.942	0.903	0.971
190	FD09255023	N0087_Tissue	190730_FD09255023	69.4X	64.0X	0.94	0.196	0.41	899.1	899.1	249209	0.941	0.894	0.965
191	FD09255030	N0088_Blood	190730_FD09255030	43.2X	39.0X	0.84	0.192	0.41	574.1	574.1	160236	0.943	0.905	0.977
192	FD09255031	N0088_Tissue	190730_FD09255031	73.6X	69.0X	0.94	0.197	0.41	960.5	960.5	267751	0.944	0.902	0.981
ID	M018		Sample Name	Illumina_Coverage	Median Coverage	Bases ≥ 30X	% Dups	% GC	M Seqs	M Clusters	Mb Yield ≥ Q30	% R1 Yield ≥ Q30	% R2 Yield ≥ Q30	% Perfect Index
193	FD09251195	TSH012_Blood	191122_FD09251195	35.6X	32.0X	0.65	0.142	0.41	425.5	425.5	118069	0.934	0.904	0.969
194	FD09251196	TSH012_Tissue	191122_FD09251196	68.1X	64.0X	0.93	0.169	0.41	817.4	817.4	227322	0.934	0.907	0.975
195	FD09251203	BRA08_Blood	191122_FD09251203	32.2X	28.0X	0.45	0.157	0.41	394.6	394.6	109809	0.934	0.909	0.968
196	FD09251204	BRA08_Tissue	191122_FD09251204	70.8X	64.0X	0.94	0.186	0.41	851	851	235443	0.932	0.9	0.977
197	FD09251211	KAL0078_Blood	191122_FD09251211	40.7X	37.0X	0.79	0.152	0.41	485.6	485.6	134041	0.931	0.897	0.973
198	FD09251219	KAL0078_Tissue	191122_FD09251219	88.2X	80.0X	0.96	0.2	0.41	1057.6	1057.6	291449	0.93	0.895	0.977
199	FD09251227	KAL0091_Blood	191122_FD09251227	37.3X	34.0X	0.7	0.149	0.41	451.1	451.1	124509	0.932	0.896	0.973
200	FD09251235	KAL0091_Tissue	191122_FD09251235	81.2X	73.0X	0.95	0.186	0.41	981.2	981.2	269320	0.93	0.887	0.976
201	FD09251243	SMU087_Blood	191122_FD09251243	46.3X	42.0X	0.87	0.163	0.41	572.2	572.2	159533	0.936	0.91	0.975
202	FD09251251	SMU087_Tissue	191122_FD09251251	83.2X	77.0X	0.95	0.184	0.41	1006	1006	279482	0.935	0.905	0.977
203	FD09251259	SMU089_Blood	191122_FD09251259	42.5X	39.0X	0.83	0.16	0.41	516	516	143124	0.934	0.903	0.968
204	FD09251267	SMU089_Tissue	191122_FD09251267	89.7X	83.0X	0.96	0.192	0.41	1082.3	1082.3	299459	0.933	0.899	0.979
205	FD09251274	SMU091_Blood	191122_FD09251274	46.3X	42.0X	0.87	0.16	0.41	558.3	558.3	154531	0.933	0.9	0.977
206	FD09251275	SMU091_Tissue	191122_FD09251275	100.4X	94.0X	0.96	0.187	0.41	1211.2	1211.2	334093	0.932	0.894	0.979
207	FD09251282	SMU094_Blood	191122_FD09251282	38.2X	35.0X	0.73	0.16	0.41	464.8	464.8	128984	0.934	0.904	0.97
208	FD09251283	SMU094_Tissue	191122_FD09251283	83.5X	77.0X	0.96	0.2	0.41	1074.2	1074.2	299875	0.936	0.913	0.973
ID	M019		Sample Name	Illumina_Coverage	Median Coverage	Bases ≥ 30X	% Dups	% GC	M Seqs	M Clusters	Mb Yield ≥ Q30	% R1 Yield ≥ Q30	% R2 Yield ≥ Q30	% Perfect Index
209	FD09251197	TSH013_Blood	191122_FD09251197	35.6X	32.0X	0.62	0.146	0.41	444.6	444.6	122579	0.932	0.894	0.97
210	FD09251205	TSH013_Tissue	191122_FD09251205	79.7X	75.0X	0.95	0.188	0.41	1005.7	1005.7	279737	0.941	0.901	0.977
211	FD09251212	BRA10_Blood	191122_FD09251212	43.5X	38.0X	0.81	0.173	0.41	545.5	545.5	150754	0.936	0.894	0.968
212	FD09251213	BRA10_Tissue	191122_FD09251213	89.3X	79.0X	0.96	0.196	0.41	1127.4	1127.4	310875	0.932	0.894	0.979
213	FD09251220	KAL0095_Blood	191122_FD09251220	48.3X	43.0X	0.88	0.169	0.41	595.4	595.4	163659	0.934	0.886	0.976
214	FD09251221	KAL0095_Tissue	191122_FD09251221	96.6X	86.0X	0.96	0.201	0.42	1202.4	1202.4	331983	0.937	0.892	0.98
215	FD09251228	SMU097_Blood	191122_FD09251228	39.6X	36.0X	0.79	0.148	0.41	489.4	489.4	136642	0.937	0.912	0.975
216	FD09251229	SMU097_Tissue	191122_FD09251229	80.1X	75.0X	0.95	0.17	0.41	971.3	971.3	269506	0.934	0.904	0.976
217	FD09251236	SMU098_Blood	191122_FD09251236	33.2X	30.0X	0.54	0.139	0.41	401.9	401.9	111784	0.936	0.906	0.97
218	FD09251237	SMU098_Tissue	191122_FD09251237	67.1X	62.0X	0.94	0.161	0.41	818.3	818.3	227714	0.935	0.908	0.977
219	FD09251244	SMU100_Blood	191122_FD09251244	34.7X	31.0X	0.6	0.146	0.41	414.9	414.9	114513	0.931	0.897	0.965
220	FD09251252	SMU100_Tissue	191122_FD09251252	70.0X	64.0X	0.94	0.174	0.41	851.3	851.3	236226	0.934	0.904	0.98
221	FD09251260	SMU101_Blood	191122_FD09251260	41.1X	37.0X	0.81	0.142	0.41	491.8	491.8	136048	0.932	0.9	0.976
222	FD09251268	SMU101_Tissue	191122_FD09251268	83.2X	77.0X	0.96	0.18	0.41	1000.5	1000.5	277300	0.933	0.902	0.979
223	FD09251276	SMU104_Blood	191122_FD09251276	36.8X	33.0X	0.68	0.155	0.41	447.4	447.4	124129	0.94	0.897	0.972
224	FD09251284	SMU104_Tissue	191122_FD09251284	77.9X	72.0X	0.95	0.186	0.41	946.4	946.4	261892	0.939	0.893	0.975
ID	M014		Sample Name	Illumina_Coverage	Median Coverage	Bases ≥ 30X	% Dups	% GC	M Seqs	M Clusters	Mb Yield ≥ Q30	% R1 Yield ≥ Q30	% R2 Yield ≥ Q30	% Perfect Index
225	FD09253983	TSH001_Blood	191121_FD09253983	45.2X	41.0X	0.86	0.178	0.41	576.4	576.4	160306	0.934	0.908	0.976
226	FD09253991	TSH001_Tissue	191121_FD09253991	68.8X	63.0X	0.94	0.187	0.41	871.1	871.1	242785	0.942	0.904	0.979
227	FD09253999	BRA04_Blood	191121_FD09253999	48.3X	42.0X	0.86	0.18	0.41	614.8	614.8	170070	0.935	0.897	0.972
228	FD09254007	BRA04_Tissue	191121_FD09254007	81.0X	73.0X	0.95	0.217	0.41	1048.2	1048.2	290741	0.936	0.901	0.981
229	FD09254015	KAL0004_Blood	191121_FD09254015	46.1X	41.0X	0.86	0.186	0.41	581.8	581.8	161478	0.938	0.9	0.98
230	FD09254023	KAL0004_Tissue	191121_FD09254023	89.7X	78.0X	0.95	0.234	0.42	1150.6	1150.6	321386	0.941	0.909	0.982
231	FD09254030	KAL0013_Blood	191121_FD09254030	35.4X	n.a.	n.a.	n.a.	n.a.	n.a.	n.a.	n.a.	0.929	0.903	n.a.
232	FD09254031	KAL0013_Tissue	191121_FD09254031	98.5X	88.0X	0.96	0.217	0.42	1217.2	1217.2	338553	0.936	0.906	0.982
233	FD09254038	SMU019_Blood	191121_FD09254038	37.2X	34.0X	0.7	0.165	0.41	454.2	454.2	126222	0.936	0.905	0.973
234	FD09254039	SMU019_Tissue	191121_FD09254039	69.3X	65.0X	0.94	0.187	0.41	865.2	865.2	242795	0.94	0.919	0.98
235	FD09254046	SMU027_Blood	191121_FD09254046	32.7X	30.0X	0.5	0.159	0.41	401.1	401.1	111734	0.936	0.909	0.973
236	FD09254047	SMU027_Tissue	191121_FD09254047	74.4X	68.0X	0.95	0.193	0.41	922.9	922.9	256584	0.936	0.905	0.981
237	FD09254054	SMU029_Blood	191121_FD09254054	35.4X	32.0X	0.63	0.168	0.41	441.6	441.6	123908	0.939	0.919	0.981
238	FD09254055	SMU029_Tissue	191121_FD09254055	78.7X	72.0X	0.95	0.207	0.41	977.1	977.1	272572	0.937	0.91	0.982
239	FD09254062	SMU030_Blood	191121_FD09254062	32.5X	29.0X	0.49	0.164	0.41	404.3	404.3	112954	0.943	0.907	0.976
240	FD09254070	SMU030_Tissue	191121_FD09254070	76.0X	71.0X	0.95	0.2	0.41	948.4	948.4	265851	0.944	0.912	0.981
ID	M015		Sample Name	Illumina_Coverage	Median Coverage	Bases ≥ 30X	% Dups	% GC	M Seqs	M Clusters	Mb Yield ≥ Q30	% R1 Yield ≥ Q30	% R2 Yield ≥ Q30	% Perfect Index
241	FD09251191	TSH003_Blood	191121_FD09251191	32.7X	29.0X	0.5	0.171	0.41	415.2	415.2	117227	0.951	0.919	0.98
242	FD09251192	TSH003_Tissue	191121_FD09251192	62.8X	58.0X	0.92	0.182	0.41	796.7	796.7	223461	0.947	0.91	0.981
243	FD09251199	BRA05_Blood	191121_FD09251199	39.2X	34.0X	0.66	0.188	0.42	506.9	506.9	143441	0.951	0.923	0.979
244	FD09251200	BRA05_Tissue	191121_FD09251200	53.9X	48.0X	0.9	0.188	0.41	690.2	690.2	192824	0.948	0.902	0.983
245	FD09251207	KAL0022_Blood	191121_FD09251207	41.7X	38.0X	0.81	0.182	0.41	530.8	530.8	148521	0.946	0.907	0.982
246	FD09251215	KAL0022_Tissue	191121_FD09251215	90.5X	82.0X	0.96	0.212	0.41	1155.9	1155.9	323212	0.946	0.905	0.984
247	FD09251223	KAL0043_Blood	191121_FD09251223	33.4X	30.0X	0.53	0.181	0.41	441.7	441.7	124453	0.948	0.918	0.983
248	FD09251231	KAL0043_Tissue	191121_FD09251231	81.5X	73.0X	0.93	0.221	0.41	1060.5	1060.5	297390	0.946	0.911	0.986
249	FD09251239	SMU032_Blood	191121_FD09251239	40.5X	37.0X	0.8	0.186	0.41	534.3	534.3	151168	0.951	0.923	0.982
250	FD09251247	SMU032_Tissue	191121_FD09251247	64.3X	59.0X	0.93	0.201	0.41	840	840	237207	0.949	0.921	0.982
251	FD09251255	SMU039_Blood	191121_FD09251255	40.7X	37.0X	0.81	0.186	0.41	539.6	539.6	153307	0.951	0.93	0.978
252	FD09251263	SMU039_Tissue	191121_FD09251263	64.6X	59.0X	0.92	0.192	0.41	875.3	875.3	248962	0.953	0.931	0.986
253	FD09251271	SMU041_Blood	191121_FD09251271	37.5X	34.0X	0.72	0.183	0.41	489.4	489.4	137843	0.948	0.917	0.984
254	FD09251279	SMU041_Tissue	191121_FD09251279	83.6X	78.0X	0.96	0.202	0.41	1072.8	1072.8	302522	0.948	0.919	0.986
255	FD09254063	SMU050_Blood	191121_FD09254063	47.1X	43.0X	0.88	0.186	0.41	608	608	171218	0.95	0.915	0.981
256	FD09254071	SMU050_Tissue	191121_FD09254071	81.8X	76.0X	0.96	0.212	0.41	1060.6	1060.6	298844	0.95	0.916	0.985
ID	M017		Sample Name	Illumina_Coverage	Median Coverage	Bases ≥ 30X	% Dups	% GC	M Seqs	M Clusters	Mb Yield ≥ Q30	% R1 Yield ≥ Q30	% R2 Yield ≥ Q30	% Perfect Index
257	FD09251194	TSH008_Blood	191122_FD09251194	48.6X	44.0X	0.88	0.178	0.41	614.1	614.1	169714	0.933	0.898	0.977
258	FD09251202	TSH008_Tissue	191122_FD09251202	107.3X	102.0X	0.96	0.214	0.4	1363.9	1363.9	377218	0.937	0.895	0.98
259	FD09251210	BRA07_Blood	191122_FD09251210	43.7X	37.0X	0.74	0.172	0.42	546.3	546.3	151182	0.931	0.902	0.976
260	FD09251218	BRA07_Tissue	191122_FD09251218	89.6X	81.0X	0.96	0.201	0.41	1114.7	1114.7	310391	0.932	0.912	0.978
261	FD09251226	KAL0072_Blood	191122_FD09251226	38.8X	35.0X	0.74	0.158	0.41	471	471	130132	0.929	0.901	0.968
262	FD09251234	KAL0072_Tissue	191122_FD09251234	83.5X	75.0X	0.95	0.206	0.42	1045.3	1045.3	289498	0.929	0.905	0.975
263	FD09251241	KAL0074_Blood	191122_FD09251241	39.9X	36.0X	0.78	0.162	0.41	491.8	491.8	136787	0.931	0.911	0.968
264	FD09251242	KAL0074_Tissue	191122_FD09251242	75.3X	70.0X	0.95	0.186	0.41	942.8	942.8	263142	0.933	0.916	0.98
265	FD09251249	SMU076_Blood	191122_FD09251249	41.6X	38.0X	0.82	0.158	0.41	511.7	511.7	142223	0.931	0.909	0.978
266	FD09251250	SMU076_Tissue	191122_FD09251250	80.2X	74.0X	0.95	0.194	0.41	986.4	986.4	273863	0.931	0.908	0.98
267	FD09251257	SMU079_Blood	191122_FD09251257	40.5X	37.0X	0.79	0.162	0.41	501.5	501.5	138957	0.937	0.898	0.976
268	FD09251258	SMU079_Tissue	191122_FD09251258	67.5X	62.0X	0.93	0.183	0.41	836.1	836.1	231665	0.937	0.898	0.978
269	FD09251265	SMU080_Blood	191122_FD09251265	31.5X	28.0X	0.44	0.15	0.41	386.1	386.1	106722	0.936	0.894	0.973
270	FD09251266	SMU080_Tissue	191122_FD09251266	69.3X	63.0X	0.93	0.175	0.41	857.5	857.5	237980	0.937	0.901	0.979
271	FD09251273	SMU083_Blood	191122_FD09251273	34.7X	31.0X	0.6	0.154	0.41	426.3	426.3	117902	0.936	0.896	0.97
272	FD09251281	SMU083_Tissue	191122_FD09251281	65.1X	59.0X	0.93	0.169	0.41	794.2	794.2	217998	0.934	0.884	0.98
ID	M020		Sample Name	Illumina_Coverage	Median Coverage	Bases ≥ 30X	% Dups	% GC	M Seqs	M Clusters	Mb Yield ≥ Q30	% R1 Yield ≥ Q30	% R2 Yield ≥ Q30	% Perfect Index
273	FD09251214	KAL0101_Blood	191122_FD09251214	36.9X	n.a.	n.a.	n.a.	n.a.	n.a.	n.a.	n.a.	0.933	0.895	n.a.
274	FD09251222	KAL0101_Tissue	191122_FD09251222	71.8X	63.0X	0.93	0.193	0.42	876.7	876.7	242903	0.941	0.894	0.983
275	FD09251230	SMU106_Blood	191122_FD09251230	35.5X	32.0X	0.64	0.155	0.41	431.7	431.7	120069	0.944	0.898	0.972
276	FD09251238	SMU106_Tissue	191122_FD09251238	85.1X	79.0X	0.96	0.194	0.41	1039.5	1039.5	288816	0.944	0.896	0.984
277	FD09251245	SMU107_Blood	191122_FD09251245	41.4X	37.0X	0.81	0.163	0.41	499.7	499.7	138566	0.943	0.894	0.978
278	FD09251246	SMU107_Tissue	191122_FD09251246	85.2X	79.0X	0.96	0.194	0.41	1034	1034	287738	0.945	0.898	0.983
279	FD09251253	SMU109_Blood	191122_FD09251253	40.5X	37.0X	0.81	0.181	0.41	535.3	535.3	151356	0.949	0.924	0.98
280	FD09251254	SMU109_Tissue	191122_FD09251254	82.2X	74.0X	0.95	0.218	0.42	1041.7	1041.7	292848	0.946	0.916	0.976
281	FD09251261	SMU111_Blood	191122_FD09251261	36.2X	33.0X	0.68	0.168	0.41	461.8	461.8	129546	0.945	0.912	0.979
282	FD09251262	SMU111_Tissue	191122_FD09251262	89.3X	83.0X	0.96	0.211	0.41	1119	1119	314687	0.945	0.917	0.984
283	FD09251269	SMU132_Blood	191122_FD09251269	48.2X	44.0X	0.88	0.176	0.41	605.2	605.2	169444	0.944	0.91	0.969
284	FD09251270	SMU132_Tissue	191122_FD09251270	68.3X	65.0X	0.94	0.193	0.4	867.1	867.1	242932	0.945	0.91	0.985
285	FD09251277	SMU141_Blood	191122_FD09251277	37.2X	34.0X	0.7	0.17	0.41	461.6	461.6	128813	0.942	0.906	0.979
286	FD09251285	SMU141_Tissue	191122_FD09251285	84.6X	77.0X	0.95	0.198	0.41	1030.7	1030.7	286787	0.941	0.901	0.983
ID	M021		Sample Name	Illumina_Coverage	Median Coverage	Bases ≥ 30X	% Dups	% GC	M Seqs	M Clusters	Mb Yield ≥ Q30	% R1 Yield ≥ Q30	% R2 Yield ≥ Q30	% Perfect Index
287	FD09251095	BRA13_Blood	191122_FD09251095	38.7X	34.0X	0.68	0.163	0.42	469.1	469.1	130578	0.941	0.902	0.976
288	FD09251096	BRA13_Tissue	191122_FD09251096	103.0X	92.0X	0.97	0.215	0.41	1250.3	1250.3	348107	0.941	0.903	0.978
289	FD09251103	KAL0104_Blood	191122_FD09251103	44.9X	41.0X	0.86	0.157	0.41	543	543	151372	0.942	0.905	0.974
290	FD09251104	KAL0104_Tissue	191122_FD09251104	93.1X	82.0X	0.96	0.197	0.42	1119.6	1119.6	310138	0.938	0.897	0.978
291	FD09251111	KAL0106_Blood	191122_FD09251111	39.9X	36.0X	0.77	0.157	0.41	484	484	134960	0.941	0.906	0.969
292	FD09251119	KAL0106_Tissue	191122_FD09251119	67.5X	60.0X	0.93	0.182	0.41	822.4	822.4	227708	0.938	0.896	0.98
293	FD09251127	SMU142_Blood	191122_FD09251127	44.0X	40.0X	0.85	0.165	0.41	533.7	533.7	149184	0.942	0.909	0.978
294	FD09251135	SMU142_Tissue	191122_FD09251135	84.4X	77.0X	0.95	0.2	0.42	1021.4	1021.4	286498	0.944	0.914	0.981
295	FD09251143	SMU157_Blood	191122_FD09251143	34.3X	31.0X	0.58	0.15	0.41	413.4	413.4	115350	0.941	0.907	0.736
296	FD09251151	SMU157_Tissue	191122_FD09251151	76.3X	70.0X	0.95	0.183	0.41	918.1	918.1	256332	0.941	0.908	0.74
297	FD09251159	SMU159_Blood	191122_FD09251159	39.3X	36.0X	0.76	0.152	0.41	473.3	473.3	132287	0.942	0.909	0.733
298	FD09251167	SMU159_Tissue	191122_FD09251167	85.1X	78.0X	0.95	0.179	0.42	1026.7	1026.7	288211	0.943	0.916	0.739
299	FD09251175	SMU161_Blood	191122_FD09251175	38.4X	35.0X	0.74	0.157	0.41	461.9	461.9	128468	0.939	0.903	0.734
300	FD09251183	SMU161_Tissue	191122_FD09251183	79.2X	73.0X	0.95	0.181	0.41	951.3	951.3	266368	0.942	0.912	0.741
301	FD09251278	SMU167_Blood	191122_FD09251278	45.3X	41.0X	0.86	0.166	0.41	551.3	551.3	154025	0.941	0.909	0.738
302	FD09251286	SMU167_Tissue	191122_FD09251286	86.6X	82.0X	0.96	0.181	0.41	1035.2	1035.2	288872	0.941	0.907	0.74
ID	M023		Sample Name	Illumina_Coverage	Median Coverage	Bases ≥ 30X	% Dups	% GC	M Seqs	M Clusters	Mb Yield ≥ Q30	% R1 Yield ≥ Q30	% R2 Yield ≥ Q30	% Perfect Index
303	FD09254791	KAL053_Blood	191128_FD09254791	37.9X	34.0X	0.72	0.161	0.41	465.5	465.5	129249	0.944	0.895	0.976
304	FD09254799	KAL053_Tissue	191128_FD09254799	80.5X	73.0X	0.94	0.207	0.42	1001.9	1001.9	279006	0.945	0.899	0.98
ID	M024		Sample Name	Illumina_Coverage	Median Coverage	Bases ≥ 30X	% Dups	% GC	M Seqs	M Clusters	Mb Yield ≥ Q30	% R1 Yield ≥ Q30	% R2 Yield ≥ Q30	% Perfect Index
305	FD09254807	NA	191128_FD09254807	40.2X	36.0X	0.79	0.174	0.41	504.7	504.7	141347	0.945	0.91	0.974
306	FD09254815	KAL070_Tissue	191128_FD09254815	79.6X	71.0X	0.94	0.189	0.41	993.4	993.4	278805	0.947	0.912	0.981
ID	M025		Sample Name	Illumina_Coverage	Median Coverage	Bases ≥ 30X	% Dups	% GC	M Seqs	M Clusters	Mb Yield ≥ Q30	% R1 Yield ≥ Q30	% R2 Yield ≥ Q30	% Perfect Index
307	FD09254831	SMU047_Blood	191128_FD09254831	35.9X	33.0X	0.66	0.171	0.41	452.5	452.5	126988	0.947	0.911	0.982
308	FD09254839	SMU047_Tissue	191128_FD09254839	96.0X	89.0X	0.96	0.199	0.41	1212.7	1212.7	338628	0.946	0.904	0.985
ID	M016		Sample Name	Illumina_Coverage	Median Coverage	Bases ≥ 30X	% Dups	% GC	M Seqs	M Clusters	Mb Yield ≥ Q30	% R1 Yield ≥ Q30	% R2 Yield ≥ Q30	% Perfect Index
309	FD09251193	TSH005_Blood	191122_FD09251193	38.5X	n.a.	n.a.	n.a.	n.a.	n.a.	n.a.	n.a.	0.934	0.907	n.a.
310	FD09251201	TSH005_Tissue	191122_FD09251201	65.5X	62.0X	0.92	0.164	0.41	817.4	817.4	228015	0.941	0.906	0.98
311	FD09251216	KAL0054_Blood	191122_FD09251216	32.7X	29.0X	0.49	0.162	0.41	402	402	112044	0.941	0.905	0.977
312	FD09251217	KAL0054_Tissue	191122_FD09251217	90.3X	81.0X	0.96	0.196	0.41	1106	1106	306300	0.938	0.896	0.982
313	FD09251224	KAL070_Blood	191122_FD09251224	39.5X	36.0X	0.76	0.169	0.41	488	488	136009	0.94	0.906	0.974
314	FD09251225	KAL0068_Tissue	191122_FD09251225	86.5X	78.0X	0.96	0.196	0.41	1061.4	1061.4	293832	0.938	0.896	0.984
315	FD09251232	SMU061_Blood	191122_FD09251232	44.4X	40.0X	0.85	0.169	0.41	547.7	547.7	153112	0.941	0.91	0.981
316	FD09251233	SMU061_Tissue	191122_FD09251233	89.9X	83.0X	0.96	0.203	0.41	1116.7	1116.7	311298	0.941	0.905	0.984
317	FD09251240	SMU062_Blood	191122_FD09251240	30.3X	27.0X	0.37	0.175	0.41	389	389	109397	0.947	0.915	0.977
318	FD09251248	SMU062_Tissue	191122_FD09251248	89.5X	82.0X	0.96	0.209	0.41	1173.8	1173.8	328958	0.945	0.911	0.982
319	FD09251256	SMU064_Blood	191122_FD09251256	32.0X	29.0X	0.46	0.169	0.41	416	416	116797	0.941	0.918	0.976
320	FD09251264	SMU064_Tissue	191122_FD09251264	63.5X	57.0X	0.92	0.196	0.42	809.7	809.7	227969	0.947	0.918	0.979
321	FD09251272	SMU068_Blood	191122_FD09251272	34.9X	31.0X	0.6	0.17	0.41	448.3	448.3	125556	0.943	0.912	0.972
322	FD09251280	SMU068_Tissue	191122_FD09251280	77.4X	71.0X	0.94	0.196	0.41	1004.3	1004.3	280422	0.939	0.91	0.982
ID	M022		Sample Name	Illumina_Coverage	Median Coverage	Bases ≥ 30X	% Dups	% GC	M Seqs	M Clusters	Mb Yield ≥ Q30	% R1 Yield ≥ Q30	% R2 Yield ≥ Q30	% Perfect Index
323	FD07749603	BRA15_Blood	191122_FD07749603	33.8X	29.0X	0.47	0.259	0.42	441.1	441.1	124403	0.947	0.921	0.971
324	FD07749627	BRA15_Tissue	191122_FD07749627	81.1X	74.0X	0.95	0.195	0.41	1020.1	1020.1	286490	0.947	0.913	0.971
325	FD07749630	KAL0107_Blood	191122_FD07749630	39.3X	35.0X	0.75	0.162	0.41	480.5	480.5	133899	0.943	0.902	0.965
326	FD07749803	KAL0107_Tissue	191122_FD07749803	72.7X	65.0X	0.94	0.188	0.42	889.4	889.4	247348	0.941	0.9	0.97
327	FD07749805	SMU177_Blood	191122_FD07749805	31.5X	28.0X	0.44	0.16	0.41	386.8	386.8	108390	0.944	0.911	0.967
328	FD07749807	SMU177_Tissue	191122_FD07749807	62.2X	58.0X	0.92	0.175	0.41	760.4	760.4	213102	0.945	0.911	0.974
329	FD07751370	SMU183_Blood	191122_FD07751370	34.9X	32.0X	0.61	0.154	0.41	427.4	427.4	119520	0.944	0.908	0.967
330	FD07751552	SMU183_Tissue	191122_FD07751552	74.7X	69.0X	0.95	0.183	0.41	921	921	258863	0.947	0.915	0.971
331	FD07751624	SMU195_Blood	191122_FD07751624	32.3X	29.0X	0.49	0.161	0.41	412	412	115565	0.945	0.912	0.977
332	FD07751720	SMU195_Tissue	191122_FD07751720	108.6X	102.0X	0.97	0.212	0.41	1374.8	1374.8	385212	0.945	0.911	0.978
333	FD07783720	SMU196_Blood	191122_FD07783720	46.8X	43.0X	0.87	0.181	0.41	590.3	590.3	165319	0.945	0.91	0.975
334	FD07783823	SMU196_Tissue	191122_FD07783823	97.5X	92.0X	0.96	0.207	0.4	1270.9	1270.9	357214	0.947	0.914	0.98
335	FD07784082	SMU200_Blood	191122_FD07784082	44.9X	41.0X	0.85	0.175	0.41	574.9	574.9	161475	0.945	0.915	0.974
336	FD07784109	SMU200_Tissue	191122_FD07784109	70.0X	65.0X	0.93	0.188	0.4	929.2	929.2	260000	0.945	0.908	0.979
ID	APCRC		Mean Coverage (Illumina)	Yield (MB)	% >= Q30	% EXC TOTAL	% EXC MAPQ	% EXC DUPE	% EXC UNPAIRED	% EXC BASEQ	% EXC OVERLAP	% EXC CAPPED
337	FR07887805	UP2003-B	37.92	136439	89.10	26.90	7.15	14.63	1.26	3.02	0.13	0.71
338	FR07887809	UP2003-T	80.05	280301	84.895	22.45	6.47	10.545	1.22	3.32	0.08	0.815
339	FR07887813	UP2039-B	38.71	139834	87.72	21.04	7.22	8.72	1.06	3.40	0.07	0.57
340	FR07887778	UP2039-T	68.75	253754	88.27	21.56	7.53667	9.14333	1.04667	2.98667	0.14	0.703333
341	FR07887782	UP2099-B	37.00	134161	83.24	28.51	7.17	16.32	1.16	3.18	0.07	0.60
342	FR07887794	UP2099-T	78.81	290837	86.99	17.805	5.8	6.075	1.385	3.715	0.13	0.7
343	FR07887790	UP2116-B	38.56	144256	85.27	22.15	7.51	9.09	1.22	3.48	0.13	0.73
344	FR07887802	UP2116-T	83.33	292950	88.31	20.47	6.34	8.385	1.19	3.58	0.11	0.865
345	FR07887798	UP2133-B	35.38	144426	86.34	32.03	7.24	21.05	1.18	1.94	0.08	0.54
346	FR07887810	UP2133-T	77.05	276523	88.915	21.46	6.02	9.525	1.45	3.745	0.085	0.63
347	FR07961010	UP2113-B	55.48	260114	81.71	22.065	7.445	8.155	0.83	4.78	0.11	0.755
348	FR07887786	UP2113-T	75.39	266833	84.705	26.225	6.625	15.08	1.335	2.155	0.12	0.91
349	FR07887787	5545-1079775-B	n.a.	n.a.	n.a.	n.a.	n.a.	n.a.	n.a.	n.a.	n.a.	n.a.
350	FR07887775	5545-1079775-T	60.56	253957	73.12	28.54	6.73	18.305	0.76	1.875	0.105	0.765
351	FR07887811	5684-1079906-B	67.2	246547	86.78	31.59	6.815	19.45	1.585	3.085	0.125	0.525
352	FR07887799	5684-1079906-T	66.65	274879	84.69	22.935	6.94	9.545	1.395	4.33	0.115	0.615
353	FR07887812	12543-1081384-B	41.99	153594	89.71	20.62	7.04	8.42	1.11	3.27	0.08	0.68
354	FR07887808	12543-1081384-T	71.57	287019	74.0133	22.33	7.71667	7.34667	1.58	4.71333	0.286667	0.68
355	FR07887781	13179-1096899-B	35.73	131353	83.43	32.46	6.75	21.86	0.92	2.38	0.08	0.48
356	FR07887785	13179-1096899-T	80.22	292287	84.665	21.585	6.79	9.215	1.105	3.7	0.125	0.645
357	FR07887796	10651-1042378-B	39.90	140627	86.15	22.30	6.98	10.33	1.48	2.82	0.10	0.59
358	FR07887792	10651-1042378-T	88.24	183853	87.955	18.075	6.76	6.695	1.305	2.53	0.11	0.685
359	FR07887795	10738-1042949-B	29.57	116556	77.65	38.78	7.00	27.52	1.01	2.63	0.11	0.51
360	FR07887783	10738-1042949-T	62.73	271245	78.47	33.79	6.96	23.93	0.6	1.54	0.115	0.65
361	FR07887804	11452-1056021-B	41.86	142957	86.75	24.77	6.73	13.26	1.02	3.12	0.10	0.54
362	FR07887800	11452-1056021-T	64.06	263948	71.66	22.5	6.9	9.3	1.325	4.295	0.09	0.595
363	FR07887773	13104-1095757-B	42.92	145024	84.50	24.16	6.65	13.96	1.01	1.84	0.06	0.64
364	FR07887777	13104-1095757-T	67.72	268412	81.82	26.645	7.06	14.045	1.405	3.45	0.1	0.59
365	FR07887789	15917-1147612-B	33.31	137405	80.91	36.76	7.15	26.47	0.93	1.58	0.05	0.58
366	FR07887793	15917-1147612-T	77.27	288099	88.19	22.34	7.175	9.575	1.905	2.69	0.265	0.73
367	FR07887797	16599-1159140-B	31.89	145897	72.73	33.04	6.64	22.94	1.02	1.80	0.13	0.50
368	FR07887801	16599-1159140-T	88.02	291871	89.575	18.185	6.735	5.16	1.32	4.26	0.07	0.64
369	FR07887771	5060-1034766-B	42.90	154561	88.59	20.05	6.69	9.41	1.06	2.21	0.07	0.60
370	FR07887806	5060-1034766-T	67.09	275826	80.21	23.81	7.285	11.065	1.23	3.44	0.195	0.61
371	FR07887779	5287-1079625-B	37.15	126063	84.78	23.99	6.63	13.64	1.01	2.02	0.11	0.58
372	FR07887814	5287-1079625-T	73.93	278068	80.825	23.675	6.97	11.11	1.415	3.465	0.1	0.615
373	FR07887803	5656-1034950-B	41.82	141131	85.07	23.32	6.95	11.05	1.21	3.38	0.11	0.63
374	FR07887791	5656-1034950-T	83.46	288756	87.01	18.235	6.995	6.745	1.12	2.535	0.09	0.75
375	FR07887772	5902-1035059-B	34.23	141977	82.41	24.91	7.08	12.75	1.81	2.45	0.16	0.65
376	FR07887807	5902-1035059-T	66.4	240558	85.685	25.975	7.3	12.71	1.4	3.77	0.135	0.655
377	FR07887780	5958-1040497-B	36.62	151878	80.75	26.95	6.75	16.64	1.04	1.82	0.12	0.59
378	FR07887776	5958-1040497-T	65.13	249588	83.8233	17.8633	7.10667	6.91667	0.696667	2.23667	0.183333	0.73
379	FR07887788	6359-1050886-B	36.14	139297	86.17	24.16	7.08	11.24	1.46	3.64	0.12	0.62
380	FR07887784	6359-1050886-T	66.62	287921	81.105	28.195	6.9	17.715	1.065	1.73	0.105	0.68
