# Supplementary material for: African-specific prostate cancer molecular taxonomy
Source: Research Square preprint supplement (doi:10.21203/rs.3.rs-1122619/v1), 2021-12-01
Supplement: Supplementary file 12 [file 1e03917b0e8c8e847d9645dd.xlsx]

## Sheet: Sheet1
Cancer_pathway*	Driver_gene (Armenia et al. 2018_Yes/No)	GO_Bio/Reactome#	Term_name	Adjusted_P.val	gene_size	CDS	CN	SV	Combined	Major_theme	Database genes detected here	Comment
Cell cycle	CDK12 (Yes), CDKN1B (Yes)	GO:0007049	cell cycle	0.000600805	1881	1	1	0	0	DNA checkpoint process	AKT2, APC, ATM, ATRX, BRD4, CBX3, CDK12, CDKN1B, CHD3, CNOT1, CSNK1E, CUL2, DDX4, FOXA1, IKZF1, MGA, MTOR, NDC80, NOTCH2, PBRM1, PDGFB, PIBF1, PTEN, PTP4A1, SKIL, STAT3, TP53, ZFP36L2	-
DNA repair/Genome integrity	ATM (Yes), TP53 (Yes)	GO:0042770	signal transduction in response to DNA damage	0.00731469	134	1	1	0	0	DNA checkpoint process	ATM, ATRX, BCL3, CDKN1B, CNOT1, TP53	-
Epigenetic_modifiers/Chromatin_remodelers	KANSL1 (No), KDM6A (Yes), KMT2C (Yes), ZMYM3 (Yes)	GO:0006338	chromatin remodeling	0.000231306	220	1	1	0	0	Chromatin remodeling	ARID1B, ATRX, CBX3, CHD3, CHD4, FOXA1, KDM6A, PBRM1, RERE, SMARCA4	-
PI3K	PTEN (Yes), MTOR (Yes), PIK3R1 (Yes)	REAC:R-HSA-2219528	PI3K/AKT Signaling in Cancer	0.000314854	89	1	1	0	0	PI3K/AKT signaling	PIK3R1, AKT2, PTEN, MTOR, CDKN1B, KIT, PDGFB	-
RAS/RAF/MAPK signaling	BRAF (Yes), KRAS (Yes)	GO:1902531	regulation of intracellular signal transduction	0.0466844	1883	1	1	0	0	Signal transduction	AKR1C2, ATM, BCL3, BRAF, BRD4, CDK12, CHD3, CHD4, CSPG4, KIT, KRAS, MTOR, NOTCH2, NTRK3, OTUD7A, PDE4D, PDGFB, PIK3R1, PTEN, SCAI, SKIL, TP53	-
Splicing	FIP1L1 (No), POLR2F (No), RBFOX1 (No), SENP3 (No), STAT3 (No), THADA (No), TYW1 (No), WDR74 (No)	GO:0006396	RNA processing	0.0343887	963	1	1	0	0	Signal transduction	CDK12, FIP1L1, PIK3R1, POLR2F, RBFOX1, SENP3, STAT3, THADA, TP53, TYW1, WDR74	-
WNT/CTNNB1 signaling	APC (Yes), RNF43 (Yes)	na	na	na	na	na	na	na	na	na	na	-
Immune signaling	HLA-A (No), HLA-B (No), IL6ST (Yes)	REAC:R-HSA-1280215	Cytokine Signaling in Immune system	0.0225322	830	1	1	0	0	Immune signaling	TP53, HLA-A, HLA-B, PDGFB, PIK3R1, KIT, BRAF, SMARCA4, STAT3, AKT2, JAK3, GSTA2, IL6ST, IRF4	-
Transcription_factor	FOXA1 (Yes), MGA (Yes), CIC (No)	GO:0045892	negative regulation of transcription, DNA-templated	0.000259583	1270	1	1	0	0	Signal transduction	ATAD2B, ATRX, BCL3, CBX3, CDKN1B, CHD3, CIC, CNOT1, ELK4, ERF, FOXA1, FOXP1, IKZF1, MGA, NEDD4L, NOTCH2, PDGFB, PRDM16, RUNX1T1, SKIL, SMARCA4, STAT3, TDG, TP53	-
RNA abundance	ZFP36L2 (No)	na	na	na	na	na	na	na	na	na	na	Found in 3 Africans
RTK signaling	KIT (No)	na	na	na	na	na	na	na	na	na	na	Found in 3 Africans
* Using maftools v2.6.05
# Using g:Profiler in Cytoscape
