# Supplementary material for: African-specific prostate cancer molecular taxonomy
Source: Research Square preprint supplement (doi:10.21203/rs.3.rs-1122619/v1), 2021-12-01
Supplement: Supplementary file 13 [file 2a0ee7afdf41dde7a78235ad.xlsx]

## Sheet: SBS96_class
Mutation Types	10651	10734	10738-1042949	10764	11099	11114	11119	11129	11141	11265	11452-1056021	11532	11590	11830	11874	11926	12103	12543-1081384	12571	12596	13019	13104-1095757	13179-1096899	13518	14261	14365	14862	14919	15126	15178	15917-1147612	16000	16004	16176	16263	16311	16599	16677	16995	17135	17212	17392	17827	18210	5060-1034766	5287-1079625	5545-1079775	5656-1034950	5684-1079906
A[C>A]A	65	1	64	104	5	52	2	94	2	0	30	1	89	63	1	82	0	65	3	79	32	94	89	11	91	76	76	69	19	44	43	0	76	63	4	45	77	37	129	0	51	2	0	3	45	56	65	115	83
A[C>A]C	28	2	25	76	3	36	1	61	0	1	18	0	45	39	2	51	2	33	1	49	14	51	49	6	55	50	60	46	10	35	36	0	37	52	0	39	47	19	124	0	32	0	0	0	39	32	44	75	53
A[C>A]G	9	0	13	9	0	6	0	14	0	1	4	0	5	8	0	7	1	8	0	14	4	11	7	4	9	7	9	14	3	8	7	0	14	6	0	6	7	5	13	0	5	0	1	1	14	16	13	10	5
A[C>A]T	39	0	29	64	7	35	1	65	0	0	18	1	33	48	0	31	0	29	2	69	9	51	64	9	66	56	48	48	6	23	34	1	40	48	0	20	39	19	87	0	30	1	0	0	34	39	41	60	44
A[C>G]A	24	0	24	51	3	21	0	36	0	1	13	0	20	29	0	26	1	16	1	27	6	29	33	0	34	30	20	20	0	19	19	1	19	25	0	12	26	9	50	0	16	0	1	1	22	23	31	35	18
A[C>G]C	14	0	8	21	1	15	0	18	1	1	10	1	15	12	0	18	0	7	1	14	7	15	10	3	23	14	16	7	1	27	10	0	9	23	1	9	19	1	22	1	12	1	0	0	7	8	27	25	14
A[C>G]G	3	0	5	6	0	7	1	4	0	0	0	0	5	6	0	7	0	3	2	0	1	2	7	0	5	6	3	3	2	5	1	0	5	3	0	3	3	1	7	0	5	0	0	0	4	4	7	6	5
A[C>G]T	22	2	13	42	1	11	0	32	0	0	7	0	19	31	1	20	0	16	2	28	8	25	29	2	41	23	30	24	5	30	17	1	17	40	0	25	25	10	53	0	16	0	0	1	10	29	22	29	22
A[C>T]A	58	2	87	94	10	63	1	81	3	2	52	0	68	74	1	91	3	73	5	94	25	101	89	19	91	79	75	62	16	51	77	4	66	72	4	57	61	48	101	1	73	2	1	2	68	98	97	128	77
A[C>T]C	39	0	25	52	3	31	2	54	0	3	16	0	39	38	0	42	1	22	4	39	12	45	28	7	52	40	33	40	7	34	25	0	37	51	1	31	38	34	54	0	39	0	0	1	28	41	36	58	32
A[C>T]G	289	1	207	125	8	325	0	142	5	2	72	3	237	182	1	215	3	221	13	366	34	362	282	33	219	240	346	260	46	119	111	4	265	149	2	186	274	106	134	1	250	3	2	5	249	198	145	494	227
A[C>T]T	52	0	51	61	5	39	2	57	0	1	18	1	53	28	1	49	2	35	3	68	19	56	57	5	88	58	54	48	14	34	24	1	38	48	1	35	40	31	83	1	43	1	1	3	33	40	45	66	48
A[T>A]A	27	0	27	36	4	48	0	55	2	0	18	0	25	39	1	25	0	33	4	41	10	41	38	6	38	44	36	28	6	27	37	1	32	44	1	31	31	20	59	0	21	0	0	1	28	34	42	58	56
A[T>A]C	15	0	6	32	1	26	0	32	0	0	10	1	15	20	0	17	0	15	0	22	7	18	24	0	34	21	24	24	3	17	18	0	22	30	0	12	19	8	34	2	21	0	0	0	23	20	25	18	17
A[T>A]G	22	1	14	33	2	21	0	34	0	0	10	0	20	21	1	21	0	21	2	25	8	26	24	2	29	22	21	15	2	18	16	1	29	25	0	14	16	17	61	1	17	0	0	1	23	20	19	42	16
A[T>A]T	41	0	23	56	3	51	1	69	2	0	14	0	55	53	0	49	0	32	1	73	12	61	43	7	68	55	64	51	5	54	24	0	60	50	1	25	46	15	66	1	46	0	0	3	40	38	43	62	42
A[T>C]A	72	1	69	86	6	67	2	82	5	1	45	1	76	59	3	74	2	69	7	72	33	95	68	15	81	105	44	55	10	72	76	2	83	70	7	46	45	28	89	3	62	1	2	1	56	77	97	119	89
A[T>C]C	23	0	15	21	1	16	1	31	2	1	12	1	23	16	0	21	4	14	4	20	17	26	21	1	38	28	24	20	4	21	25	1	27	23	0	11	22	13	47	0	13	0	2	1	23	24	31	36	25
A[T>C]G	40	3	33	55	2	27	1	48	2	2	13	1	44	38	2	35	0	31	3	35	13	38	29	2	61	45	42	30	7	44	32	2	62	50	1	29	39	23	47	1	34	1	0	4	35	45	55	56	63
A[T>C]T	64	0	39	70	4	36	0	74	0	1	20	0	58	52	1	59	0	45	3	51	23	52	63	5	75	82	62	56	6	43	53	1	75	77	0	55	65	33	86	1	47	0	0	2	36	39	62	94	54
A[T>G]A	24	0	16	29	4	25	0	27	0	0	13	0	17	14	0	16	0	18	1	24	6	28	22	1	23	19	18	26	3	16	24	3	18	24	2	12	17	3	31	0	18	0	0	0	17	14	17	28	36
A[T>G]C	6	0	5	15	1	7	0	14	1	0	7	0	7	9	1	7	0	6	0	7	0	11	10	0	6	10	12	12	1	7	4	0	6	14	0	9	4	2	9	0	4	0	0	0	9	9	6	13	7
A[T>G]G	17	1	16	20	2	17	0	19	0	0	6	1	7	13	0	13	0	9	1	15	4	12	14	2	24	14	13	9	2	17	14	0	4	15	0	8	16	5	14	0	4	0	0	1	8	15	20	27	13
A[T>G]T	27	1	7	24	4	15	0	28	0	0	7	1	19	24	0	18	1	13	0	21	17	21	16	0	24	35	22	15	3	27	17	0	20	19	0	16	18	5	32	0	12	0	0	0	16	14	30	29	28
C[C>A]A	50	1	34	81	2	34	0	46	2	1	12	1	48	43	0	50	3	48	1	60	13	55	58	7	66	52	52	47	6	34	27	0	32	54	1	27	43	30	85	1	35	0	0	1	50	43	36	95	37
C[C>A]C	24	1	22	52	4	26	0	45	0	0	5	1	26	24	0	27	3	18	2	45	14	37	30	2	57	26	30	29	7	33	19	1	40	28	1	19	32	12	70	1	17	0	0	0	24	29	41	57	30
C[C>A]G	6	0	7	18	2	7	1	9	1	0	2	0	5	6	1	9	1	6	0	10	7	4	7	3	12	5	9	8	2	6	2	1	9	11	0	2	3	7	15	0	4	0	0	0	7	17	13	11	7
C[C>A]T	16	0	14	58	4	25	2	41	0	1	14	0	29	24	0	39	1	34	0	30	14	38	52	2	45	52	31	25	4	20	17	0	38	41	1	21	32	9	71	0	26	1	2	1	26	27	23	52	38
C[C>G]A	9	0	10	24	0	6	1	20	0	0	4	0	14	12	1	11	0	12	1	8	4	11	12	0	24	15	12	13	4	4	5	0	6	18	0	12	13	5	32	0	8	0	0	0	11	9	17	12	17
C[C>G]C	13	0	3	25	0	6	0	22	1	1	4	0	13	9	0	15	0	8	0	24	9	9	9	3	16	12	11	13	1	13	13	1	18	20	0	6	9	5	28	0	19	1	0	0	7	15	17	14	12
C[C>G]G	4	0	2	7	0	7	0	8	1	0	1	0	8	7	1	8	2	3	1	11	0	7	7	1	10	9	8	3	1	8	8	0	12	7	0	5	5	2	11	0	2	0	1	1	3	7	11	14	9
C[C>G]T	24	0	19	28	0	9	0	25	1	0	3	0	6	25	0	19	0	17	0	8	7	11	12	2	25	19	21	19	2	18	8	1	20	21	0	13	14	10	47	0	10	0	0	0	11	12	29	19	25
C[C>T]A	26	1	29	63	9	34	2	71	0	0	21	1	55	36	2	36	2	43	0	61	23	73	48	11	97	50	46	48	17	47	41	1	43	54	3	34	31	33	88	0	33	3	2	1	53	53	50	79	58
C[C>T]C	42	1	23	63	3	30	0	53	1	2	18	0	48	50	1	44	1	35	2	45	16	42	45	5	78	31	37	36	7	25	31	1	50	46	0	20	44	35	64	1	39	0	2	2	41	38	42	61	45
C[C>T]G	158	0	93	87	8	157	3	96	3	1	46	2	126	132	1	108	4	128	6	202	19	172	170	14	140	137	201	133	26	80	67	3	150	95	2	94	125	45	98	3	125	3	3	3	140	87	81	299	114
C[C>T]T	63	2	41	95	10	39	1	72	1	4	27	0	49	44	0	46	0	45	2	70	22	74	55	9	88	70	66	52	9	48	47	2	61	60	1	45	67	44	105	0	48	1	0	0	44	51	59	78	65
C[T>A]A	12	0	7	36	2	15	0	20	0	0	5	1	11	18	1	14	0	12	1	14	5	17	16	3	22	19	21	13	2	14	6	0	18	11	0	7	13	6	40	0	16	0	1	0	12	14	16	20	21
C[T>A]C	19	2	23	40	1	16	0	27	0	0	9	1	14	14	0	12	1	15	0	23	6	19	16	4	15	20	13	20	1	12	13	2	23	19	2	15	17	5	55	0	13	0	0	5	15	21	29	41	25
C[T>A]G	15	0	23	35	4	14	0	33	0	1	7	1	26	13	0	22	1	12	1	26	10	28	13	3	24	24	21	14	2	16	18	1	22	21	0	18	19	5	66	0	14	0	0	0	19	23	21	28	26
C[T>A]T	19	0	11	53	2	19	0	34	2	1	10	0	13	15	0	30	0	14	0	32	10	30	33	2	41	28	26	19	1	16	16	0	35	22	0	23	23	8	53	0	31	0	2	0	14	19	14	32	24
C[T>C]A	14	0	17	31	3	26	1	29	0	0	10	1	16	24	1	20	0	25	2	24	8	22	24	3	33	28	15	12	2	23	16	1	26	22	0	22	26	3	32	0	17	0	0	2	17	21	27	37	33
C[T>C]C	30	0	19	37	4	14	1	33	2	2	9	0	17	31	0	29	1	10	1	29	9	25	20	2	34	34	27	14	2	24	14	1	16	30	1	24	25	8	33	2	34	0	3	0	22	21	27	30	31
C[T>C]G	22	1	17	30	1	22	4	30	2	1	18	1	25	19	1	26	1	26	2	27	14	24	35	10	28	26	23	28	3	29	15	2	22	39	3	8	30	6	42	1	14	1	1	1	40	39	40	56	31
C[T>C]T	26	3	29	48	3	27	1	36	3	1	10	1	21	28	1	33	1	17	4	23	7	27	24	2	35	39	23	12	2	16	11	2	21	36	0	22	33	11	37	0	15	0	0	0	21	23	34	56	33
C[T>G]A	4	0	5	14	0	5	0	9	0	0	2	0	4	6	0	6	0	4	0	4	4	8	6	0	20	7	6	9	0	8	2	0	4	4	0	5	16	1	14	0	9	0	0	1	8	9	13	12	13
C[T>G]C	11	0	7	18	2	25	0	19	0	0	2	0	4	11	1	13	0	6	0	9	3	12	8	1	18	21	12	6	1	13	7	0	7	11	0	16	10	2	15	1	16	0	0	0	10	6	16	18	10
C[T>G]G	12	1	11	19	1	12	1	22	0	0	4	0	15	11	0	16	3	7	3	13	4	17	13	1	17	13	12	11	3	23	8	0	15	11	0	7	16	7	27	0	10	1	0	0	15	8	23	19	20
C[T>G]T	13	0	6	25	1	19	0	21	0	0	3	0	14	15	0	24	1	13	2	18	3	20	11	1	26	16	23	18	2	29	12	0	16	19	2	13	13	3	31	0	20	0	0	0	16	16	30	22	25
G[C>A]A	52	0	30	59	3	46	0	49	0	1	13	0	55	42	0	38	0	41	1	51	20	54	57	4	54	53	66	58	12	34	33	1	36	47	1	29	30	21	62	1	26	0	3	4	49	36	47	110	42
G[C>A]C	15	0	17	33	3	29	1	32	0	1	6	0	30	29	0	23	2	28	0	32	13	26	32	6	35	35	34	29	9	28	20	2	20	34	0	19	27	9	72	1	16	0	0	0	15	25	25	40	33
G[C>A]G	3	0	4	6	0	3	0	10	0	0	2	0	5	7	0	10	0	7	0	10	6	4	5	2	18	7	11	11	0	8	8	1	7	14	0	7	13	4	8	0	8	1	1	0	9	2	8	13	14
G[C>A]T	24	0	19	39	1	31	0	43	0	0	7	0	34	31	0	31	0	27	0	38	4	35	37	3	45	26	46	34	3	21	22	0	27	27	0	22	23	22	72	0	18	0	0	1	22	27	17	60	23
G[C>G]A	2	0	3	14	0	10	0	12	0	0	4	0	8	12	0	8	1	5	0	12	5	8	12	1	11	5	9	9	4	10	8	0	7	10	1	7	10	5	18	1	6	0	2	0	5	12	11	20	14
G[C>G]C	9	0	6	16	1	9	2	22	0	1	3	0	9	17	0	14	1	8	0	14	5	19	10	1	20	12	13	11	1	17	9	0	13	21	0	11	9	2	24	1	8	0	0	0	11	13	17	18	13
G[C>G]G	5	0	1	3	1	2	3	3	0	0	4	0	2	4	1	1	0	3	1	3	3	3	0	0	4	5	1	3	0	3	6	0	1	6	1	1	1	1	4	0	4	0	1	1	2	6	3	7	2
G[C>G]T	15	0	7	24	1	9	0	18	1	0	3	0	13	15	0	12	0	9	1	17	3	12	12	2	16	19	7	10	2	12	7	0	11	14	0	11	13	5	29	0	10	0	1	0	8	8	21	21	11
G[C>T]A	50	0	33	57	10	39	0	67	4	3	18	1	40	71	2	45	1	42	4	66	29	78	52	11	70	57	53	50	10	47	53	0	47	71	1	37	47	18	95	0	37	2	0	0	49	46	59	81	51
G[C>T]C	51	0	29	64	4	55	0	75	0	3	15	1	48	59	1	41	0	45	4	63	15	62	51	7	67	46	61	57	6	43	33	0	37	60	1	33	42	29	69	0	51	0	1	1	47	35	57	64	62
G[C>T]G	177	0	123	101	9	230	3	155	1	1	47	0	201	193	1	145	2	166	8	281	24	248	231	24	230	190	307	195	31	80	91	6	185	129	2	142	230	80	128	1	229	0	4	2	194	172	142	396	181
G[C>T]T	34	0	23	56	5	58	1	56	0	3	21	0	42	58	0	44	2	37	4	68	15	53	54	11	78	53	50	64	8	47	37	2	56	65	2	41	51	36	93	3	45	0	2	2	39	41	44	79	46
G[T>A]A	13	0	6	12	2	12	0	21	0	1	2	0	13	9	0	16	0	8	1	11	1	15	6	2	19	13	13	12	1	6	8	0	15	11	1	8	11	5	23	0	13	0	0	0	6	12	6	21	20
G[T>A]C	12	0	7	10	1	2	0	14	0	0	2	0	3	9	0	9	0	5	1	6	2	11	8	1	9	5	9	12	1	6	6	0	6	8	0	3	13	7	12	0	11	0	1	1	5	11	12	11	9
G[T>A]G	19	0	15	20	0	8	0	18	3	1	13	2	16	20	1	19	0	19	1	16	6	20	22	0	22	20	16	10	2	15	12	1	21	18	1	13	12	6	38	2	9	1	2	0	11	22	21	30	27
G[T>A]T	17	0	13	26	2	6	0	26	0	0	10	0	10	10	0	19	1	8	0	15	2	19	25	2	28	15	16	14	1	10	11	2	16	19	1	19	12	13	36	1	13	0	0	0	10	21	24	16	14
G[T>C]A	33	0	19	46	3	26	2	41	1	0	15	0	36	34	0	26	1	22	0	30	20	45	28	1	41	42	28	38	7	48	22	0	33	45	0	26	26	7	53	1	28	0	0	1	21	24	51	51	46
G[T>C]C	17	0	8	20	3	21	0	24	0	0	10	0	23	29	1	18	0	21	1	28	15	34	21	3	19	42	27	24	1	29	16	0	17	24	1	21	21	11	31	0	15	0	0	0	22	20	33	52	24
G[T>C]G	25	0	23	17	1	23	2	25	2	1	16	0	19	18	3	31	0	22	2	23	16	31	46	2	40	30	35	22	6	25	20	1	28	31	2	14	27	8	33	1	22	1	1	2	33	52	44	61	42
G[T>C]T	48	0	24	48	7	32	0	53	1	1	27	1	27	51	1	37	0	27	0	38	17	34	34	3	40	49	40	37	5	32	27	1	45	52	1	32	40	17	52	0	32	0	0	0	28	28	48	61	29
G[T>G]A	7	0	3	11	2	7	0	8	0	0	5	0	5	5	0	9	1	6	1	5	5	6	2	1	8	8	7	5	2	6	8	0	7	6	1	4	9	1	16	0	7	1	0	0	6	3	3	9	7
G[T>G]C	10	0	2	8	2	11	1	10	0	0	1	0	5	9	0	7	0	3	0	12	4	11	7	1	9	10	5	9	2	9	4	0	6	7	0	2	5	5	10	0	6	0	0	0	5	12	11	10	5
G[T>G]G	16	0	9	22	5	9	1	18	0	2	5	0	8	11	0	15	1	8	3	11	4	22	17	2	19	13	9	13	3	7	10	2	15	14	2	11	10	5	23	1	17	0	0	1	10	13	18	18	9
G[T>G]T	18	0	6	15	1	9	0	19	0	1	8	1	14	19	0	16	1	5	1	19	8	15	14	1	23	25	15	10	1	22	12	0	15	22	0	11	12	3	16	0	13	0	1	1	12	10	17	30	20
T[C>A]A	50	0	43	78	7	31	3	74	2	0	18	0	49	54	0	55	0	46	2	57	16	58	63	5	94	52	65	61	5	45	42	2	49	63	4	24	43	18	97	0	36	0	0	1	58	44	51	76	52
T[C>A]C	38	0	23	58	3	43	0	55	1	1	10	0	39	53	0	60	0	49	1	46	22	59	38	6	92	51	60	40	7	63	41	0	43	65	0	37	39	14	96	2	37	0	0	0	34	45	57	84	54
T[C>A]G	9	0	5	14	3	9	0	6	0	0	2	0	9	14	0	10	0	9	0	14	4	10	12	0	16	11	11	10	0	12	8	1	12	13	0	5	4	4	8	0	4	0	0	1	10	5	12	19	9
T[C>A]T	69	0	44	73	3	51	0	99	1	1	16	0	75	83	1	77	1	58	2	80	22	82	64	6	137	68	106	72	9	60	54	2	73	78	2	50	59	16	116	0	40	0	1	0	55	72	69	138	76
T[C>G]A	19	0	12	46	2	20	0	69	0	2	8	1	15	30	0	39	1	22	4	19	10	25	21	6	71	24	20	24	3	37	21	0	31	35	0	20	15	12	54	0	17	0	1	0	14	16	36	22	27
T[C>G]C	17	0	10	29	3	17	0	50	0	0	5	0	17	21	0	22	0	22	0	15	8	26	15	1	51	31	14	23	5	23	12	1	25	21	1	20	19	8	53	0	15	0	1	1	14	18	34	28	20
T[C>G]G	10	0	4	5	1	6	2	3	0	0	4	0	3	4	0	6	0	2	1	6	2	4	1	1	6	8	3	4	1	8	3	0	4	5	0	6	0	2	10	0	1	0	0	0	3	4	5	7	10
T[C>G]T	40	0	31	94	3	31	1	126	0	1	11	1	26	45	1	45	2	31	1	38	19	41	37	0	124	65	41	46	7	51	26	0	55	62	4	38	49	12	91	0	29	1	0	2	30	34	76	70	55
T[C>T]A	65	0	43	80	8	51	0	103	3	0	25	0	64	88	0	51	2	47	5	70	38	97	37	7	268	75	87	58	9	87	44	2	87	105	1	47	79	21	133	0	48	2	1	3	46	60	75	97	71
T[C>T]C	57	0	26	76	4	46	0	80	3	1	27	0	71	73	3	72	1	61	0	64	32	75	48	8	183	80	62	61	7	70	47	0	59	86	1	47	78	38	99	1	69	2	1	1	40	55	77	88	69
T[C>T]G	114	0	91	53	6	133	0	63	0	3	33	0	86	71	1	102	4	85	5	158	20	153	132	14	114	98	149	125	16	51	57	9	109	62	0	76	112	41	65	2	90	1	2	2	85	93	69	204	87
T[C>T]T	67	0	49	96	4	48	3	80	1	2	33	0	49	72	2	63	0	42	5	84	30	95	69	9	227	71	83	66	8	69	64	2	79	77	2	45	57	31	136	0	42	2	3	3	46	56	73	98	72
T[T>A]A	53	0	37	43	5	56	0	55	3	0	21	0	66	52	0	47	1	49	3	64	7	68	46	2	63	63	56	69	4	45	37	1	47	67	3	34	53	8	90	0	51	0	0	0	51	43	42	108	84
T[T>A]C	16	1	8	24	3	7	1	19	0	0	6	0	7	15	0	14	0	7	0	20	14	16	12	0	21	18	15	14	0	15	9	0	20	15	0	12	12	10	35	0	9	0	0	0	5	12	25	17	11
T[T>A]G	10	0	12	26	0	7	0	19	0	0	4	0	9	11	0	7	1	7	0	11	5	15	8	3	19	19	10	12	3	13	8	0	17	13	1	8	8	2	21	0	11	0	0	0	7	17	17	23	11
T[T>A]T	61	0	42	67	3	38	2	59	1	1	12	0	49	54	2	64	0	23	0	67	15	54	64	5	65	58	48	42	4	36	25	1	52	41	2	38	44	14	91	0	44	0	3	2	44	35	50	80	52
T[T>C]A	35	1	17	39	3	43	0	45	0	1	11	0	36	50	1	35	1	22	3	42	24	46	35	3	56	54	37	42	6	40	27	1	50	64	3	33	30	18	46	1	38	0	2	1	20	35	52	45	58
T[T>C]C	22	0	28	35	4	22	0	30	1	0	16	0	31	34	1	23	2	18	1	24	16	30	27	3	44	49	30	18	7	30	26	1	34	53	0	23	27	5	53	1	24	0	0	1	16	33	47	46	55
T[T>C]G	14	0	20	22	3	23	0	26	3	3	10	1	11	15	0	11	5	25	1	24	5	28	29	3	26	33	15	16	2	21	24	0	15	31	0	16	35	7	38	0	12	0	3	1	36	36	37	47	35
T[T>C]T	44	1	42	62	0	36	1	56	0	0	37	0	41	51	1	37	1	50	5	46	21	63	56	4	56	41	44	52	7	56	47	0	41	65	2	33	55	11	76	1	32	1	2	1	50	46	84	102	51
T[T>G]A	21	0	13	26	2	29	0	22	0	0	8	0	13	13	0	20	1	10	1	14	16	19	14	7	22	21	13	23	5	19	16	1	13	34	0	19	27	4	27	0	18	0	0	1	12	9	21	23	27
T[T>G]C	9	0	8	24	4	13	1	21	1	1	9	0	8	16	0	15	1	11	1	8	7	12	15	6	15	18	17	8	1	15	10	0	13	18	0	10	12	9	23	0	6	0	0	1	17	17	20	7	23
T[T>G]G	11	0	14	23	1	13	0	16	0	0	5	1	13	15	1	14	1	20	4	23	5	14	21	1	27	15	17	13	1	17	18	0	19	13	2	14	20	3	29	1	7	1	0	1	9	19	23	15	14
T[T>G]T	43	0	23	54	3	35	0	67	1	0	20	0	38	45	1	42	2	31	2	44	25	50	27	5	54	51	56	37	2	53	48	0	41	58	1	30	38	11	55	0	31	2	0	1	26	37	58	75	63
[truncated: 134 more columns]

## Sheet: DBS78_class
Mutation Type	10651	10734	10738-1042949	10764	11099	11114	11119	11129	11141	11265	11452-1056021	11532	11590	11830	11874	11926	12103	12543-1081384	12571	12596	13019	13104-1095757	13179-1096899	13518	14261	14365	14862	14919	15126	15178	15917-1147612	16000	16004	16176	16263	16311	16599	16677	16995	17135	17212	17392	17827	18210	5060-1034766	5287-1079625	5545-1079775	5656-1034950	5684-1079906
AC>CA	0	0	0	0	0	1	0	1	0	0	0	0	2	1	0	1	0	0	0	1	0	2	0	0	0	0	0	0	0	0	1	0	0	0	0	1	1	0	0	0	0	0	0	1	0	2	0	4	0
AC>CG	0	0	0	0	0	0	0	0	0	0	0	0	0	0	0	0	0	0	1	0	0	0	0	0	0	0	0	0	0	0	0	0	0	0	0	0	0	0	0	0	0	0	0	0	0	0	1	0	0
AC>CT	1	0	0	0	0	0	0	1	0	0	0	0	0	0	0	0	0	0	0	0	2	0	0	0	0	1	0	0	1	1	0	0	0	0	0	0	0	0	0	0	0	0	0	0	0	1	1	0	0
AC>GA	2	0	0	1	1	0	0	0	0	0	0	0	2	0	0	1	0	1	0	0	1	1	1	0	0	0	0	0	0	1	0	0	0	0	0	0	0	0	3	0	0	0	0	0	1	0	0	1	0
AC>GG	0	0	0	0	0	0	1	0	0	0	1	0	1	0	0	0	0	0	0	0	1	0	1	0	0	1	0	0	0	0	0	0	0	0	0	0	0	0	0	0	0	0	0	0	0	0	0	1	0
AC>GT	0	0	0	0	0	0	0	1	2	0	0	1	0	0	1	0	0	2	0	0	1	2	3	0	0	1	0	0	0	2	3	0	0	0	0	3	0	0	2	0	0	0	0	1	1	2	3	0	0
AC>TA	0	0	0	0	0	0	0	1	0	0	0	0	0	0	0	0	0	0	0	0	0	0	1	0	0	0	0	0	1	0	0	0	1	1	0	0	1	0	1	0	0	0	0	0	1	4	0	0	0
AC>TG	0	0	0	1	0	0	0	0	0	0	0	0	0	1	1	0	0	1	0	0	0	1	1	0	0	0	0	1	0	1	0	0	0	0	0	1	0	0	0	1	0	1	0	0	1	0	0	0	0
AC>TT	0	0	0	0	0	1	0	1	0	0	0	0	0	1	0	0	0	0	0	0	0	1	0	0	1	2	0	0	0	2	0	0	0	0	0	0	0	0	0	0	0	0	0	0	0	0	1	0	0
AT>CA	1	0	0	0	1	0	0	0	0	0	0	0	0	0	0	1	0	0	0	0	0	0	0	0	0	1	0	0	0	0	0	0	0	0	0	0	0	0	0	0	0	0	0	0	0	0	1	0	0
AT>CC	0	0	0	0	0	0	0	0	0	0	0	0	0	0	0	0	1	0	0	1	0	0	1	0	1	0	0	0	0	0	0	0	0	0	0	0	0	0	0	0	0	0	0	0	0	0	1	3	0
AT>CG	0	0	0	0	0	0	0	0	0	0	0	0	0	0	0	0	0	0	0	1	0	0	0	0	0	0	0	0	0	0	0	0	0	0	0	0	0	0	0	0	0	0	0	0	0	0	2	0	0
AT>GA	0	1	0	0	0	0	0	0	0	0	0	0	1	1	0	0	0	0	0	2	1	0	0	0	1	0	0	0	0	2	0	0	0	0	1	0	0	0	0	0	0	0	0	1	1	0	1	2	1
AT>GC	3	0	0	0	0	0	1	0	1	0	0	0	1	0	0	1	0	0	1	0	1	1	2	0	1	1	0	0	0	0	0	1	1	0	0	0	1	0	2	0	0	0	0	0	4	1	2	1	2
AT>TA	1	0	0	0	0	1	0	1	1	0	0	0	0	0	0	0	0	0	0	0	0	0	1	1	2	0	0	0	0	0	1	0	0	1	0	0	0	0	0	0	0	0	0	0	0	0	0	2	1
CC>AA	2	0	2	6	0	5	0	1	0	0	1	0	1	2	0	0	0	1	0	1	3	2	3	0	2	1	1	0	0	2	2	0	4	1	0	0	1	2	5	0	2	0	0	0	1	0	0	3	4
CC>AG	0	0	0	0	0	0	0	1	0	0	1	0	1	1	0	0	0	0	0	0	2	1	0	0	2	2	1	1	1	0	0	0	0	1	0	0	0	1	2	0	0	0	0	0	1	2	4	0	0
CC>AT	0	0	2	1	0	0	0	3	0	0	0	0	1	0	0	0	0	2	0	0	1	2	0	1	0	0	1	0	0	1	1	0	0	1	0	0	0	0	1	1	0	0	0	0	1	2	2	2	2
CC>GA	0	0	0	0	0	1	0	1	0	0	0	0	0	1	0	0	0	0	0	0	1	0	0	0	2	3	1	0	0	1	0	1	0	1	0	1	1	0	0	0	0	0	0	0	1	0	0	0	0
CC>GG	0	0	1	0	0	0	0	0	1	0	0	0	0	0	0	0	0	0	1	0	0	2	0	1	0	0	1	0	0	0	1	0	0	0	0	1	0	0	1	0	0	0	0	0	0	0	0	0	0
CC>GT	0	0	0	0	1	0	0	0	0	0	0	0	0	1	0	0	0	1	0	0	0	1	0	0	0	0	0	1	0	0	0	0	0	2	0	0	0	0	0	0	0	0	0	0	0	4	1	1	0
CC>TA	0	0	1	0	1	0	0	0	0	0	1	0	0	1	0	0	0	0	0	0	0	1	0	0	2	0	0	0	0	0	0	0	0	0	0	1	0	0	0	0	1	0	0	0	0	0	0	1	1
CC>TG	1	0	2	0	0	3	0	2	0	0	1	0	2	3	1	2	0	1	0	2	0	4	5	0	1	0	1	2	2	1	3	0	2	1	0	0	1	0	3	0	0	0	0	0	2	5	0	4	0
CC>TT	0	0	3	0	0	0	0	0	0	1	1	0	1	1	1	0	0	2	1	1	1	3	0	1	1	3	1	0	1	1	4	0	1	0	0	0	0	0	0	0	0	0	0	0	2	4	3	2	3
CG>AT	0	0	0	1	0	0	0	0	0	0	0	0	0	0	0	1	0	0	0	0	0	0	0	0	0	0	0	0	0	0	1	0	0	0	0	0	0	0	0	0	0	0	0	0	0	0	0	0	0
CG>GC	0	0	0	0	0	0	0	0	0	0	0	0	0	0	0	0	0	1	0	0	0	0	0	0	0	0	0	0	0	0	0	0	0	0	0	0	0	0	0	0	0	0	0	0	0	0	0	0	0
CG>GT	0	0	0	0	0	0	0	0	0	0	0	0	0	0	0	0	0	0	0	0	0	0	0	0	0	0	0	0	0	0	0	0	0	0	0	0	0	0	1	0	0	0	0	0	0	0	1	0	0
CG>TA	1	0	1	0	0	0	0	0	1	0	0	0	1	0	0	0	0	0	0	0	0	1	0	0	1	0	0	1	0	0	1	0	1	1	0	0	0	0	0	0	1	0	0	0	1	3	1	1	0
CG>TC	0	0	0	1	0	0	0	0	0	0	1	0	0	0	0	0	0	0	1	0	1	2	1	0	0	0	0	0	0	1	0	0	1	0	0	0	0	0	0	0	0	0	0	0	1	2	1	0	0
CG>TT	0	0	0	1	0	0	0	0	0	0	0	0	0	0	0	0	0	1	0	2	0	0	1	0	0	0	1	0	0	0	0	0	0	0	0	0	0	0	0	0	0	0	0	0	1	0	0	0	0
CT>AA	0	0	0	0	0	1	0	0	0	0	0	0	0	1	0	0	0	0	0	0	1	0	0	0	0	0	0	0	0	0	0	0	0	0	0	0	0	0	0	0	1	0	0	0	0	1	0	0	1
CT>AC	0	0	0	1	0	0	1	0	0	0	0	0	0	0	0	0	0	0	0	0	0	0	0	0	0	0	0	0	0	0	0	0	1	0	0	0	0	0	0	0	0	0	0	0	1	1	1	1	0
CT>AG	0	0	0	1	0	0	0	0	0	0	0	0	0	0	0	0	0	0	0	0	1	0	0	0	0	0	0	0	0	1	0	0	0	0	0	0	0	0	3	0	0	0	0	0	0	1	0	1	1
CT>GA	1	0	1	0	0	0	0	0	0	0	0	0	0	0	0	0	0	0	0	0	0	0	0	0	0	0	0	0	0	0	1	0	0	0	0	0	0	0	0	0	1	0	0	0	0	0	0	0	0
CT>GC	0	0	0	2	0	0	0	0	0	0	0	0	0	0	0	0	0	0	1	1	0	1	0	0	2	0	0	0	0	2	0	0	0	0	1	0	0	0	0	0	0	0	0	1	0	0	0	1	0
CT>GG	0	0	1	0	0	1	0	0	0	0	0	0	0	0	0	0	1	2	2	0	1	1	0	0	0	0	0	1	0	0	2	0	0	0	0	1	0	0	0	0	1	0	0	0	2	0	0	1	0
CT>TA	0	0	0	0	0	1	0	0	0	0	1	0	0	0	0	0	0	1	0	0	1	0	0	0	2	1	0	0	0	0	0	0	0	1	0	1	0	1	0	0	1	0	0	0	0	1	0	1	0
CT>TC	0	0	1	1	0	0	1	1	0	0	2	0	0	1	0	0	0	1	0	0	3	3	4	1	0	0	1	1	0	0	1	0	0	1	0	1	0	0	1	0	1	0	0	0	2	2	0	7	1
CT>TG	0	1	2	2	1	2	1	0	0	0	0	0	0	0	0	1	0	1	0	1	0	1	2	0	1	1	1	0	1	0	0	0	0	0	0	0	0	0	2	0	1	1	0	0	3	3	1	8	1
GC>AA	1	0	1	3	0	0	0	3	0	0	1	0	3	2	0	2	0	2	0	2	1	2	1	1	2	3	2	3	0	1	3	0	0	2	0	2	0	1	3	0	2	0	0	1	2	2	2	5	0
GC>AG	0	0	0	1	0	2	0	1	1	0	0	0	1	1	0	0	0	1	0	0	1	1	0	0	1	0	0	0	0	0	1	0	0	0	0	1	0	1	1	0	0	0	0	0	0	1	0	0	1
GC>AT	0	0	0	0	0	1	0	1	0	0	0	0	1	0	0	1	0	1	0	1	0	1	2	0	0	0	1	1	0	0	0	0	0	0	0	0	2	0	3	1	0	0	0	0	1	1	2	0	2
GC>CA	0	0	0	0	0	0	0	0	0	0	0	0	2	0	0	0	1	0	0	2	0	0	1	0	0	0	0	1	0	0	1	0	0	0	0	1	0	0	0	0	0	0	0	0	0	1	0	2	0
GC>CG	0	0	0	0	0	0	0	0	0	0	0	0	0	0	0	0	0	0	0	0	0	0	0	0	0	0	0	0	0	0	0	0	0	0	0	0	0	0	0	0	0	0	0	0	0	0	0	0	0
GC>TA	0	0	1	1	0	0	0	0	0	0	0	0	1	0	0	0	0	0	0	0	0	0	0	0	0	0	0	0	0	0	0	0	0	0	0	0	0	0	0	0	0	0	0	0	0	0	0	0	0
TA>AT	0	0	0	1	0	0	0	2	0	0	0	0	0	0	0	0	0	0	0	2	0	0	0	0	1	0	0	0	0	0	0	0	1	0	0	0	0	0	1	0	0	0	0	0	1	1	1	0	0
TA>CG	0	0	0	0	0	0	0	0	0	0	0	0	0	0	0	0	0	1	0	0	1	0	1	0	0	1	0	0	0	1	0	0	0	0	0	1	0	0	0	0	0	0	0	1	0	3	0	2	0
TA>CT	0	0	0	0	1	0	0	1	0	0	1	0	0	0	1	0	0	0	0	1	0	0	1	0	0	0	0	0	0	0	1	0	0	0	0	0	0	0	0	0	0	0	0	0	0	2	1	1	0
TA>GC	0	0	0	0	0	0	0	0	0	0	0	0	0	0	0	0	0	0	0	0	0	0	0	0	0	0	0	0	0	0	0	0	0	0	0	0	0	0	0	0	0	0	0	0	0	0	0	0	0
TA>GG	0	0	0	1	0	0	0	0	0	0	0	0	0	0	0	0	0	0	0	0	0	0	1	0	0	1	0	0	0	0	1	0	0	0	0	0	0	0	0	0	0	0	0	0	0	1	0	0	1
TA>GT	1	0	0	0	0	0	0	0	0	0	0	0	1	0	0	2	0	0	0	0	0	1	1	0	0	0	0	1	0	0	0	0	0	1	0	0	1	0	2	0	0	0	0	0	0	1	0	0	1
TC>AA	0	0	2	1	1	0	0	5	0	0	1	0	0	3	0	3	0	0	0	1	2	1	0	0	3	3	1	1	0	1	5	0	3	2	1	1	1	0	8	1	1	0	0	0	1	1	3	0	0
TC>AG	1	0	1	0	0	0	0	0	0	0	0	0	0	0	0	1	0	0	0	0	0	0	0	0	0	0	0	1	0	1	0	0	1	0	0	0	0	0	1	0	1	0	0	0	0	0	0	2	0
TC>AT	0	0	0	1	0	0	0	1	0	0	0	0	0	2	0	1	0	1	0	0	2	1	2	0	1	0	0	0	0	2	1	0	0	0	0	0	1	1	4	0	0	0	1	0	0	1	0	0	0
TC>CA	0	0	1	0	0	0	0	2	0	0	1	0	2	0	0	1	0	0	1	0	1	0	1	0	2	3	2	1	0	0	1	0	0	2	0	0	1	0	2	1	0	0	0	0	0	0	1	0	0
TC>CG	0	0	1	0	0	0	0	0	0	0	0	0	0	1	0	0	0	0	0	0	0	0	0	0	1	0	0	0	0	0	1	0	0	0	0	1	0	0	0	0	0	0	0	0	1	2	0	2	0
TC>CT	2	0	1	1	0	0	0	0	1	0	0	0	0	1	0	0	0	1	0	1	1	1	1	0	0	1	1	0	0	0	1	0	1	3	0	0	1	0	0	0	1	0	0	1	1	2	0	1	1
TC>GA	0	0	0	2	0	0	0	1	1	0	0	0	0	0	0	0	0	0	0	0	0	3	0	0	1	1	0	0	0	1	0	0	1	0	0	0	0	0	2	0	0	0	0	0	0	0	0	0	0
TC>GG	0	0	0	0	0	0	1	0	0	0	0	0	0	0	0	0	0	0	0	0	1	0	0	0	0	0	0	0	0	0	0	0	0	0	0	0	0	0	0	0	0	0	0	0	0	1	0	0	0
TC>GT	0	0	0	0	0	1	0	0	0	0	0	0	1	0	0	1	0	0	1	0	0	1	0	0	0	1	0	2	0	0	0	0	0	0	0	1	1	0	0	0	0	0	0	0	1	0	2	2	0
TG>AA	0	0	1	0	0	0	0	1	1	0	0	0	0	0	0	0	0	0	0	1	1	1	0	0	1	1	0	0	0	1	1	0	2	2	0	0	1	0	2	0	0	0	0	0	0	1	1	0	0
TG>AC	0	0	0	1	0	0	0	0	0	0	0	1	0	0	0	0	0	1	0	1	0	0	2	0	0	0	0	1	0	1	0	0	0	0	0	0	0	0	0	0	0	0	1	0	0	0	0	0	1
TG>AT	1	0	1	0	0	1	0	0	0	0	0	0	1	1	0	1	0	0	0	1	0	1	1	0	1	0	0	1	0	0	0	0	0	0	0	0	0	0	2	1	0	0	0	0	1	1	2	0	0
TG>CA	1	2	9	3	3	5	2	6	1	2	10	1	6	0	3	9	1	18	1	9	12	7	21	3	6	8	8	7	5	8	5	1	3	7	0	3	3	3	4	1	6	2	3	1	30	45	16	34	2
TG>CC	1	0	2	0	0	1	0	0	0	1	0	0	1	0	0	0	1	2	0	0	2	0	0	1	0	0	1	1	0	1	2	0	0	1	0	0	0	0	1	1	0	0	0	0	3	6	0	4	0
TG>CT	0	0	0	2	1	1	0	0	1	0	0	0	2	0	0	2	0	5	0	2	1	0	2	1	3	1	0	2	0	2	0	1	1	0	1	1	0	0	2	0	0	0	0	1	1	6	3	4	1
TG>GA	2	0	0	0	1	1	0	0	0	0	0	0	1	1	0	0	0	1	0	0	0	0	1	0	1	0	0	0	0	0	0	0	0	1	0	0	0	0	0	0	0	0	0	0	0	0	0	0	0
TG>GC	0	0	0	0	0	0	0	0	0	0	0	0	1	1	0	0	0	0	0	0	0	1	0	0	0	0	0	0	0	1	0	0	0	0	0	0	0	0	0	0	0	0	0	0	0	0	0	0	0
TG>GT	0	0	0	1	0	0	0	0	0	0	0	0	0	0	0	1	0	1	0	0	0	1	2	0	0	1	0	2	0	0	0	0	1	1	0	1	0	0	0	0	0	0	0	0	1	3	3	0	0
TT>AA	5	0	1	3	0	0	0	0	0	0	0	0	1	1	0	1	1	0	0	2	1	1	0	1	3	2	1	2	0	1	0	0	1	3	1	1	1	1	5	0	3	0	0	0	1	0	1	4	1
TT>AC	0	0	1	1	0	0	0	0	0	0	1	0	0	1	0	0	0	0	0	0	0	0	1	0	0	1	0	1	0	0	0	0	0	0	0	0	0	0	0	0	0	0	1	0	0	2	1	0	0
TT>AG	0	0	1	0	0	0	0	0	0	0	0	0	0	0	0	0	0	0	0	0	0	0	1	0	0	0	0	0	0	1	1	0	0	0	0	0	0	0	0	0	0	0	0	0	1	0	0	0	0
TT>CA	0	0	0	0	0	0	0	0	0	0	0	0	0	0	0	0	0	1	0	0	0	0	0	0	0	0	0	0	0	1	0	0	0	0	0	0	0	0	0	0	0	0	0	0	0	2	0	0	0
TT>CC	0	0	0	0	1	0	0	1	0	0	0	0	1	0	0	0	0	1	1	1	2	1	0	0	0	1	0	0	0	3	0	0	0	1	0	1	1	1	0	0	1	0	1	0	0	4	0	3	0
TT>CG	0	0	0	0	0	0	0	0	0	0	0	0	0	0	0	0	0	0	0	0	1	0	1	0	0	0	0	0	0	0	0	0	1	0	0	0	0	0	0	0	0	0	0	0	2	0	1	1	0
TT>GA	0	0	0	0	1	0	0	0	0	0	1	0	0	0	0	0	0	0	0	0	0	0	0	0	0	0	1	1	0	0	0	0	0	1	0	0	0	0	0	0	0	0	0	0	0	0	0	1	0
TT>GC	0	0	0	0	0	0	0	1	0	0	0	0	0	0	0	0	0	0	0	0	1	0	0	1	0	0	0	0	0	0	0	0	0	4	0	1	1	0	1	0	0	0	0	0	0	0	0	0	0
TT>GG	1	0	0	1	1	0	0	0	0	0	0	0	1	0	0	0	0	0	0	0	1	0	1	0	0	0	0	0	0	1	0	0	0	0	0	0	0	0	0	0	0	0	0	0	0	0	1	1	1
[truncated: 134 more columns]

## Sheet: ID83_class
Mutation Type	10651	10734	10738-1042949	10764	11099	11114	11119	11129	11141	11265	11452-1056021	11532	11590	11830	11874	11926	12103	12543-1081384	12571	12596	13019	13104-1095757	13179-1096899	13518	14261	14365	14862	14919	15126	15178	15917-1147612	16000	16004	16176	16263	16311	16599	16677	16995	17135	17212	17392	17827	18210	5060-1034766	5287-1079625	5545-1079775	5656-1034950	5684-1079906
1:Del:C:0	21	0	21	27	1	12	0	22	0	0	13	0	12	15	0	18	1	25	2	14	4	28	31	5	18	33	25	11	2	18	23	0	10	13	0	17	14	6	33	0	24	0	1	0	25	23	35	50	35
1:Del:C:1	13	1	12	10	0	6	0	11	0	0	8	0	10	11	0	7	0	7	0	11	1	11	10	1	18	7	16	13	0	19	5	0	11	19	0	5	11	7	16	0	15	0	0	0	10	9	12	17	18
1:Del:C:2	3	0	2	4	0	2	0	9	0	0	2	0	4	3	0	4	0	5	0	3	0	11	3	0	5	9	10	1	0	5	4	0	3	0	0	9	5	1	8	0	3	0	0	0	1	4	6	2	10
1:Del:C:3	2	0	2	3	1	3	0	7	0	0	0	0	2	2	0	2	0	2	0	1	0	3	2	1	3	4	1	3	0	2	0	0	0	7	0	1	4	0	6	0	3	0	0	0	3	1	2	6	12
1:Del:C:4	2	0	0	3	0	2	0	2	0	0	0	1	2	2	0	3	0	2	0	2	0	1	2	0	3	1	1	2	0	3	5	0	0	0	0	1	4	0	1	0	0	0	0	0	0	1	4	3	4
1:Del:C:5	2	0	0	0	0	1	0	3	0	0	0	0	1	5	0	0	0	1	0	0	0	0	4	0	3	4	0	2	0	1	3	0	2	3	0	2	4	0	2	0	0	0	0	0	0	1	3	5	11
1:Del:T:0	20	0	41	16	2	18	0	22	0	2	12	0	12	14	0	18	0	16	0	16	2	30	19	1	19	12	20	21	0	13	41	1	14	15	0	18	19	9	30	0	17	0	0	1	11	24	35	53	24
1:Del:T:1	10	0	9	10	1	7	0	15	0	0	4	0	7	6	0	8	0	4	0	5	1	18	5	3	10	8	8	5	1	19	6	0	8	8	0	3	14	3	13	0	8	0	0	0	6	12	8	25	10
1:Del:T:2	13	0	10	11	0	8	1	14	0	0	2	0	9	8	0	5	0	5	0	4	2	12	8	0	22	7	10	7	0	12	7	0	10	15	0	9	14	0	22	0	6	0	0	0	6	7	16	17	13
1:Del:T:3	14	0	5	13	0	0	0	7	0	0	5	0	7	5	0	8	0	6	0	11	3	11	5	0	18	7	9	5	1	10	7	0	12	17	0	6	4	3	22	0	8	1	0	1	6	9	8	11	10
1:Del:T:4	11	0	3	6	0	3	0	10	0	0	3	0	9	5	0	8	0	4	0	10	0	10	10	0	17	9	9	6	1	9	7	0	4	11	1	8	10	2	16	0	4	0	0	1	8	5	9	8	12
1:Del:T:5	46	0	7	11	0	10	0	35	0	0	2	0	8	93	0	32	1	9	0	25	1	5	19	0	56	14	34	19	3	9	14	0	49	18	0	5	42	1	28	0	7	1	1	0	17	9	18	23	33
1:Ins:C:0	8	0	10	6	0	7	1	13	0	0	5	0	5	7	0	6	0	7	0	4	0	5	9	0	13	3	5	13	0	4	9	0	8	6	1	4	4	1	4	0	5	0	0	0	10	5	10	16	11
1:Ins:C:1	2	1	2	2	1	2	0	5	0	0	0	0	2	1	0	4	1	6	0	2	1	3	2	0	3	2	3	3	0	1	0	0	2	0	0	2	3	0	3	0	0	1	0	0	2	1	0	2	2
1:Ins:C:2	1	0	0	1	0	0	0	1	0	0	0	0	1	0	0	0	0	0	0	2	0	1	1	0	1	0	0	1	0	0	0	0	0	2	1	0	1	0	1	0	2	0	0	0	1	2	3	2	1
1:Ins:C:3	0	0	0	1	0	0	0	1	0	0	2	0	0	0	0	0	0	0	0	1	0	0	1	0	0	1	0	0	0	1	2	0	2	0	0	0	0	1	1	0	0	0	0	0	1	0	3	0	0
1:Ins:C:4	1	0	0	0	0	2	0	2	0	0	0	0	0	1	0	2	0	0	1	3	0	1	1	0	2	0	0	4	0	0	1	0	2	0	0	0	2	0	2	0	1	0	0	0	0	0	2	2	1
1:Ins:C:5	7	0	0	4	0	2	0	3	0	0	1	0	6	10	0	3	0	2	0	4	1	2	5	0	8	4	9	4	0	6	3	0	11	1	0	2	4	0	8	0	6	0	0	0	1	0	11	5	12
1:Ins:T:0	17	2	14	6	0	10	0	7	0	1	6	0	9	5	0	13	3	11	0	11	1	17	9	0	12	10	9	12	0	4	5	2	6	8	0	3	10	0	12	0	7	1	0	0	12	9	13	33	7
1:Ins:T:1	5	0	3	2	0	3	0	9	0	0	2	0	7	7	1	10	0	5	2	8	1	4	4	1	8	5	7	6	2	6	4	0	6	3	0	6	4	1	5	1	6	0	0	0	9	9	13	14	7
1:Ins:T:2	3	0	5	1	0	4	0	3	0	0	0	0	6	5	0	0	0	5	0	4	0	5	4	0	6	6	6	4	0	5	1	0	4	5	0	1	8	0	6	0	1	0	0	0	1	2	7	10	5
1:Ins:T:3	5	0	2	5	0	1	0	4	0	0	1	0	5	4	0	1	1	0	0	1	0	3	2	0	4	6	2	2	0	1	2	0	4	1	0	2	8	0	3	0	5	0	0	0	1	1	5	10	4
1:Ins:T:4	5	0	7	0	0	3	0	4	0	0	1	0	1	1	0	1	0	1	1	6	1	2	4	0	8	3	5	2	0	3	2	0	3	3	1	2	3	0	2	0	0	0	0	0	4	3	3	9	3
1:Ins:T:5	135	0	22	25	0	49	1	134	1	0	6	0	72	185	1	101	0	50	0	77	2	41	51	1	178	66	163	71	0	47	29	0	141	77	2	27	142	4	70	0	58	0	0	1	90	37	142	106	124
2:Del:R:0	7	0	12	7	0	3	0	4	0	2	6	0	6	8	0	4	0	7	1	7	0	15	14	3	8	6	5	5	0	13	18	0	5	3	1	6	3	3	9	0	5	1	0	0	9	14	16	30	16
2:Del:R:1	11	0	9	7	1	9	0	6	0	0	5	0	2	9	0	9	0	8	0	10	1	15	12	1	11	4	7	1	3	5	18	0	5	10	1	4	11	0	8	0	4	0	1	1	6	6	9	17	4
2:Del:R:2	2	0	8	1	0	1	0	3	0	0	2	0	3	1	0	1	0	0	0	5	0	4	5	0	4	2	2	0	1	3	6	0	3	3	0	1	1	1	2	0	4	0	0	0	3	2	4	7	4
2:Del:R:3	1	0	9	0	0	0	0	1	0	0	2	0	1	0	0	1	0	0	0	0	0	1	1	0	1	0	0	0	0	0	5	0	3	0	0	0	0	0	1	0	0	0	0	0	1	1	2	4	1
2:Del:R:4	0	0	3	0	0	1	0	0	0	0	3	0	0	0	0	0	0	1	0	0	0	2	0	0	1	0	0	0	0	0	3	0	0	0	0	0	0	0	1	0	0	0	0	0	0	3	1	5	2
2:Del:R:5	1	0	215	1	1	1	0	3	0	0	113	0	3	3	2	0	0	133	0	1	0	165	194	0	2	0	1	1	0	1	251	0	1	0	1	0	2	0	0	0	0	0	0	0	111	227	159	221	37
3:Del:R:0	0	0	6	2	0	1	0	2	0	0	0	0	4	3	0	6	0	0	0	1	1	3	1	3	0	2	2	1	2	5	3	0	3	3	0	2	1	0	3	0	3	0	0	0	2	11	4	8	2
3:Del:R:1	2	0	1	3	1	5	0	10	0	0	1	0	3	10	0	6	0	3	0	8	0	8	8	1	4	3	3	6	0	7	3	0	7	3	0	2	1	2	2	1	3	0	0	0	6	6	2	8	6
3:Del:R:2	1	0	0	0	0	0	0	0	0	0	0	0	0	1	0	0	0	0	0	1	0	1	1	0	0	0	0	0	0	0	0	0	0	1	0	0	1	0	0	0	0	0	0	0	0	0	0	0	0
3:Del:R:3	0	0	0	0	0	0	0	1	0	0	1	0	0	0	0	0	0	0	0	1	0	2	1	0	1	0	0	0	0	0	3	0	0	0	0	0	0	0	0	0	0	0	0	0	1	3	0	0	0
3:Del:R:4	0	0	12	0	0	0	0	0	0	0	4	0	0	0	0	0	0	2	0	0	0	7	12	0	0	0	0	0	0	0	20	0	0	0	0	0	0	0	0	0	0	0	0	0	8	16	12	9	3
3:Del:R:5	0	0	6	1	0	0	0	0	0	0	1	0	0	1	0	0	1	7	0	0	0	12	7	0	2	0	0	0	0	1	26	0	2	0	0	1	2	0	1	0	0	0	0	0	11	23	13	7	6
4:Del:R:0	3	0	4	3	0	1	0	2	1	0	2	0	1	0	0	5	0	2	0	1	1	4	4	0	5	0	2	2	0	2	1	0	1	1	0	0	4	1	3	0	1	0	0	0	2	3	3	7	3
4:Del:R:1	3	0	0	0	0	0	0	1	0	0	0	0	0	2	0	1	0	1	0	0	0	0	1	0	3	0	0	0	0	0	1	0	0	0	0	0	0	0	0	0	0	0	0	0	0	1	4	1	4
4:Del:R:2	0	0	0	0	0	0	0	0	0	0	0	0	0	1	0	1	0	0	0	0	0	1	0	0	1	0	0	0	0	1	0	0	1	1	0	0	0	0	0	0	0	0	0	0	0	2	0	1	1
4:Del:R:3	0	0	4	0	0	0	0	0	0	0	0	0	0	0	0	0	0	3	0	0	0	3	7	0	0	0	0	1	0	0	7	0	0	0	0	0	2	0	0	0	0	0	0	0	4	11	2	8	1
4:Del:R:4	1	0	4	0	0	0	0	1	0	0	0	0	0	1	0	0	0	3	0	0	0	4	4	0	0	0	0	0	0	0	3	0	0	0	0	0	0	0	0	0	1	0	0	0	6	2	6	4	4
4:Del:R:5	1	0	8	0	0	0	0	1	1	0	0	0	1	0	0	1	2	2	0	0	0	3	6	0	0	0	0	0	0	0	9	0	1	0	0	0	1	0	1	0	1	0	0	0	6	3	6	6	3
5:Del:R:0	12	4	16	30	4	9	2	17	1	3	16	0	11	13	0	12	5	8	3	14	10	26	15	8	18	13	16	11	9	21	30	1	10	25	2	11	8	5	21	4	6	2	3	3	12	17	16	24	17
5:Del:R:1	4	1	0	1	1	1	0	0	5	0	0	0	2	5	2	1	2	0	0	2	0	0	0	1	2	0	2	3	1	2	2	1	3	2	0	1	2	1	8	0	1	0	1	2	1	1	2	3	3
5:Del:R:2	1	2	0	0	0	0	0	0	1	0	1	0	1	0	1	3	1	1	0	0	0	2	1	0	0	2	2	1	1	1	1	0	4	2	1	0	0	0	3	0	0	2	1	1	4	0	3	2	1
5:Del:R:3	0	0	2	1	0	0	0	1	0	0	0	0	0	0	0	0	1	1	0	1	0	0	1	0	1	0	0	2	0	1	2	0	1	2	1	0	0	0	0	1	0	0	2	0	0	2	0	2	0
5:Del:R:4	0	0	2	0	0	1	0	1	2	0	0	0	0	0	0	0	2	0	0	1	1	0	0	1	1	1	0	0	0	0	0	1	0	0	0	0	0	0	2	0	0	0	1	0	0	0	0	1	0
5:Del:R:5	0	1	0	1	0	1	0	1	0	0	0	0	0	0	0	0	2	0	1	2	0	1	0	1	0	1	1	1	0	1	0	1	0	0	1	0	1	3	2	1	0	0	0	0	0	0	1	2	0
2:Ins:R:0	6	1	12	0	1	1	2	8	0	0	2	1	9	7	1	3	0	3	1	6	3	8	11	1	7	3	6	6	0	6	18	0	14	3	0	5	7	2	9	0	8	0	0	1	10	9	17	21	10
2:Ins:R:1	0	1	1	3	0	1	0	1	0	0	1	0	1	1	0	0	1	1	1	3	2	0	4	0	6	2	1	5	1	4	4	0	2	3	0	2	4	0	2	0	3	0	0	0	2	2	2	8	6
2:Ins:R:2	0	1	0	0	0	2	1	1	0	0	1	0	0	1	0	1	0	0	0	1	0	0	1	0	1	0	1	1	0	0	0	0	0	2	0	0	0	0	0	0	0	0	0	0	1	0	0	4	2
2:Ins:R:3	1	0	0	0	0	1	0	1	0	0	1	0	0	0	0	0	0	0	0	0	1	0	0	0	2	0	0	0	0	0	0	0	0	1	1	0	1	0	1	0	0	0	0	0	1	0	0	1	0
2:Ins:R:4	0	0	1	0	0	0	0	0	0	0	0	0	0	1	0	0	1	1	0	0	0	0	0	0	1	0	1	0	0	0	0	0	0	2	0	0	0	0	0	0	0	0	0	0	0	1	0	0	0
2:Ins:R:5	5	0	0	0	0	0	0	5	0	2	1	0	0	10	0	3	2	0	0	1	0	0	2	2	3	0	5	0	0	0	0	0	3	0	2	0	8	0	1	0	2	1	0	0	1	0	3	2	5
3:Ins:R:0	4	0	1	2	0	1	1	2	0	0	1	0	3	2	0	2	0	3	2	2	0	3	2	0	4	1	2	1	0	2	1	0	7	3	0	2	2	0	3	0	1	0	0	0	2	5	2	6	3
3:Ins:R:1	0	0	1	1	0	0	0	2	0	0	0	0	0	1	1	2	0	0	0	3	1	3	0	0	1	0	2	1	0	2	0	0	1	1	0	1	1	1	1	0	1	0	0	0	0	1	0	2	1
3:Ins:R:2	0	0	0	0	0	0	0	0	0	0	0	0	1	1	0	1	0	0	0	1	0	0	0	0	1	0	0	1	0	0	1	0	1	0	0	0	0	0	1	0	0	0	0	0	0	0	1	1	0
3:Ins:R:3	0	0	0	0	0	0	0	0	0	0	0	0	0	0	0	0	0	0	0	0	0	0	0	0	0	0	0	0	0	0	0	0	0	0	0	0	0	0	0	0	1	0	0	0	0	0	0	0	0
3:Ins:R:4	0	0	0	0	0	0	0	0	0	1	0	0	0	0	0	0	0	0	0	0	0	0	1	0	0	0	0	0	0	0	0	0	0	0	0	0	0	0	0	0	0	0	0	0	0	0	0	0	0
3:Ins:R:5	0	0	0	0	0	0	0	0	1	1	0	0	0	1	0	1	0	1	0	0	0	0	0	0	0	0	1	1	0	0	0	0	1	0	2	0	0	0	0	0	0	0	0	0	0	0	1	1	0
4:Ins:R:0	3	0	3	3	0	4	0	2	0	0	0	0	5	4	1	6	1	3	3	5	1	4	7	0	5	3	1	3	2	4	4	1	5	2	0	4	1	0	7	1	4	0	0	0	1	4	0	7	5
4:Ins:R:1	2	0	0	1	0	1	0	0	0	0	0	0	0	1	0	1	0	0	0	1	0	1	2	0	2	0	0	0	0	2	1	0	0	3	0	0	0	0	4	0	2	1	0	0	0	0	0	2	1
4:Ins:R:2	0	0	0	0	0	0	0	0	0	0	0	0	0	0	0	0	0	0	0	0	0	0	0	1	0	0	0	0	0	0	0	0	0	1	0	0	0	0	1	0	0	0	0	0	0	0	0	0	1
4:Ins:R:3	0	0	0	0	1	0	0	0	0	0	0	0	0	0	0	0	1	0	0	0	0	2	0	0	0	0	0	0	0	0	0	0	0	0	0	0	0	0	0	0	0	0	0	1	1	0	0	0	0
4:Ins:R:4	0	0	0	0	0	0	0	0	0	1	0	0	0	0	0	0	0	0	0	0	0	1	1	0	0	0	0	0	0	0	0	0	1	0	0	0	0	0	0	0	0	0	0	0	0	1	0	0	0
4:Ins:R:5	2	0	1	0	3	2	0	3	1	0	0	0	0	0	0	1	1	0	0	1	0	0	0	0	3	2	0	0	0	1	0	1	0	3	0	0	2	2	1	0	0	1	2	0	1	0	1	2	1
5:Ins:R:0	22	9	29	24	13	15	15	18	25	13	17	5	18	26	12	23	24	14	14	34	8	9	23	13	23	16	17	21	13	8	31	14	16	10	13	15	20	13	30	18	17	13	21	26	13	28	31	56	14
5:Ins:R:1	8	1	1	6	3	5	1	1	3	3	1	1	3	5	3	8	8	3	4	6	8	3	2	1	6	4	6	4	6	5	6	1	4	4	4	4	3	2	6	2	5	2	4	3	3	4	4	4	5
5:Ins:R:2	0	0	0	1	1	1	2	0	3	2	2	0	0	3	1	1	2	1	0	1	1	1	3	2	0	1	3	2	0	0	1	1	5	0	2	1	0	2	3	1	1	2	3	2	3	0	1	1	2
5:Ins:R:3	2	0	2	4	1	0	1	0	3	3	0	0	0	1	0	1	1	0	1	0	0	0	1	1	2	2	2	0	0	1	0	1	3	2	1	3	0	0	1	2	0	0	0	2	0	1	0	0	1
5:Ins:R:4	0	0	0	0	0	0	0	0	2	0	1	0	0	0	3	0	2	0	1	0	2	0	0	0	2	0	0	1	0	0	0	1	0	0	1	0	0	1	0	1	0	0	1	0	0	0	2	1	0
5:Ins:R:5	2	1	0	1	0	1	0	0	2	0	0	1	3	1	2	1	1	0	1	0	0	0	1	1	1	1	0	2	1	1	1	1	1	1	0	1	2	0	0	0	0	0	1	0	1	0	0	1	1
2:Del:M:1	12	0	16	5	0	6	0	9	0	0	11	0	10	7	0	7	1	12	1	13	0	18	24	0	11	14	8	13	0	13	25	0	11	9	0	2	6	5	11	0	6	0	0	0	7	10	10	43	13
3:Del:M:1	2	0	0	5	0	1	0	4	0	0	1	0	2	2	0	1	1	3	1	5	0	6	1	0	4	0	3	1	1	2	2	0	0	2	0	1	3	3	2	0	1	0	0	1	4	4	7	4	4
3:Del:M:2	4	0	6	3	0	4	0	2	0	1	1	0	3	6	0	2	0	5	0	5	0	5	8	2	3	0	4	4	0	3	4	0	1	4	0	0	3	2	2	0	6	0	0	0	2	4	7	5	8
4:Del:M:1	1	0	6	6	1	4	0	2	1	0	5	0	1	3	0	5	0	3	0	4	0	8	9	0	4	1	2	1	0	0	16	0	2	6	0	1	1	0	2	1	1	0	0	0	0	4	3	4	7
4:Del:M:2	3	0	3	9	0	4	0	2	0	0	0	0	5	3	0	8	0	2	0	4	0	3	0	0	4	1	0	1	0	1	1	1	1	6	0	3	1	0	2	0	1	0	0	0	1	0	3	3	5
4:Del:M:3	2	0	5	4	0	6	0	3	0	0	0	0	5	7	0	4	0	2	0	4	0	3	7	1	3	4	3	4	2	1	7	0	4	4	1	3	3	2	6	0	1	0	0	0	2	2	6	15	6
5:Del:M:1	12	0	30	25	4	13	1	16	0	3	12	3	14	13	1	18	2	3	4	14	7	19	20	2	17	12	15	12	9	12	34	0	8	18	1	6	9	5	14	1	4	1	0	4	10	19	25	32	22
5:Del:M:2	4	0	5	47	1	7	0	8	0	2	3	1	6	5	1	12	2	3	2	5	0	10	4	1	8	7	10	8	1	11	12	2	6	4	0	4	8	8	12	0	7	1	0	2	3	6	10	20	8
5:Del:M:3	2	1	2	37	1	1	0	1	1	0	5	0	6	4	0	15	0	4	5	2	3	9	5	3	5	4	1	3	1	4	9	0	1	4	0	2	2	0	4	3	1	0	0	3	6	10	7	12	7
5:Del:M:4	1	0	5	19	0	1	1	8	0	0	3	0	1	1	0	6	0	2	1	1	5	0	2	2	1	2	1	3	1	2	1	0	2	1	0	1	1	0	3	0	1	0	0	0	1	4	1	6	2
5:Del:M:5	9	3	22	20	9	8	3	9	4	3	14	2	7	6	1	12	6	15	16	15	4	8	27	6	10	6	5	7	18	13	28	6	9	10	1	5	4	10	8	4	4	5	2	4	14	19	18	25	14
[truncated: 134 more columns]

## Sheet: CN45_class
Mutation Type	10651	10734	10738-1042949	10764	11099	11114	11119	11129	11141	11265	11452-1056021	11532	11590	11830	11874	11926	12103	12543-1081384	12571	12596	13019	13104-1095757	13179-1096899	13518	14261	14365	14862	14919	15126	15178	15917-1147612	16000	16004	16176	16263	16311	16599	16677	16995	17135	17212	17392	17827	18210	5060-1034766	5287-1079625	5545-1079775	5656-1034950	5684-1079906
2:het:0-100kb	190	97	196	142	147	80	77	82	326	113	66	129	127	174	170	82	636	82	186	53	146	70	156	161	45	218	125	144	56	78	199	164	298	104	177	155	89	258	185	225	43	70	129	206	72	121	208	154	72
2:het:100kb-1Mb	590	353	741	805	555	696	320	678	2207	480	327	556	435	583	540	317	1547	384	633	464	552	331	522	633	197	1754	553	567	565	331	672	548	1557	458	653	1091	397	808	650	757	309	259	456	703	346	459	672	535	310
2:het:1Mb-10Mb	559	447	561	790	566	604	450	112	804	574	420	573	513	576	580	440	837	514	565	80	583	414	545	623	35	709	622	575	625	361	590	612	802	536	628	845	405	723	569	738	428	348	512	655	418	541	527	560	389
2:het:10Mb-40Mb	25	62	44	6	38	3	62	0	0	31	73	33	39	26	31	53	3	48	40	0	35	59	26	25	1	0	17	42	1	37	13	21	2	29	29	1	58	17	25	17	25	50	47	20	55	55	23	23	60
2:het:>40Mb	0	0	0	0	0	0	0	0	0	0	0	0	0	0	0	1	0	0	0	0	0	1	0	0	0	0	0	0	0	0	0	0	0	0	0	0	0	0	0	0	0	0	0	0	0	0	0	0	1
3-4:het:0-100kb	587	57	473	290	66	64	52	286	855	76	66	115	55	538	197	61	1185	93	158	774	130	33	76	166	456	125	290	211	41	11	108	137	653	49	468	337	272	305	129	226	24	12	73	171	53	93	537	61	310
3-4:het:100kb-1Mb	141	4	160	42	4	12	7	1024	43	8	14	20	14	62	35	19	99	36	18	1598	29	6	29	23	868	55	41	45	9	9	18	11	79	8	78	44	148	40	60	54	2	61	4	18	17	45	129	4	90
3-4:het:1Mb-10Mb	14	0	18	13	0	8	0	440	0	0	0	0	0	0	0	2	1	3	0	269	0	0	6	0	562	9	9	0	0	13	0	0	2	0	2	0	39	0	1	2	14	71	0	0	1	4	23	0	2
3-4:het:10Mb-40Mb	0	0	0	0	0	0	0	0	0	0	0	0	0	0	1	3	0	0	1	0	1	0	1	0	10	0	4	0	0	2	0	0	0	1	0	0	0	0	0	0	3	7	0	0	0	0	6	1	2
3-4:het:>40Mb	0	0	0	0	0	0	0	0	0	0	0	0	0	0	0	0	0	0	0	0	0	0	0	0	1	0	0	0	0	0	0	0	0	0	0	0	0	0	0	0	0	0	0	0	0	0	0	0	2
5-8:het:0-100kb	365	165	409	288	151	194	132	332	410	204	182	251	175	266	301	145	596	226	307	1342	298	144	260	369	340	285	257	375	158	52	270	240	328	150	292	256	140	482	347	356	91	77	183	337	125	258	336	160	192
5-8:het:100kb-1Mb	1	0	4	0	0	1	0	321	0	0	0	3	0	1	0	1	0	7	1	1009	2	0	2	0	92	0	0	0	1	1	7	1	0	0	2	0	0	3	1	0	0	0	0	0	2	3	5	0	0
5-8:het:1Mb-10Mb	0	0	0	0	0	0	0	146	0	0	0	1	0	0	0	0	0	2	1	421	0	0	0	0	109	0	0	0	0	1	2	0	0	0	0	0	1	0	0	0	0	0	0	0	1	3	1	0	0
5-8:het:10Mb-40Mb	0	0	0	0	0	0	0	0	0	0	0	0	0	0	0	0	0	0	0	0	0	0	0	0	1	0	0	0	0	0	0	0	0	0	0	0	0	0	0	0	0	0	0	0	0	0	0	0	0
5-8:het:>40Mb	0	0	0	0	0	0	0	0	0	0	0	0	0	0	0	0	0	0	0	0	0	0	0	0	0	0	0	0	0	0	0	0	0	0	0	0	0	0	0	0	0	0	0	0	0	0	0	0	0
9+:het:0-100kb	121	72	255	117	130	134	67	160	134	110	100	74	81	95	82	83	259	74	110	499	112	69	85	111	133	112	97	100	101	58	75	116	145	123	106	108	72	137	165	215	66	70	96	110	58	86	175	106	65
9+:het:100kb-1Mb	0	0	0	0	0	0	0	18	0	0	0	0	0	0	0	1	0	0	0	5	0	0	0	0	2	0	0	0	0	0	1	0	0	0	0	0	0	0	0	0	0	0	0	0	1	2	0	0	0
9+:het:1Mb-10Mb	0	0	0	0	0	0	0	5	0	0	0	0	0	0	0	0	0	0	0	0	0	0	0	0	0	0	0	0	0	0	0	0	0	0	0	0	0	0	0	0	0	0	0	0	0	0	0	0	0
9+:het:10Mb-40Mb	0	0	0	0	0	0	0	0	0	0	0	0	0	0	0	0	0	0	0	0	0	0	0	0	0	0	0	0	0	0	0	0	0	0	0	0	0	0	0	0	0	0	0	0	0	0	0	0	0
1:LOH:0-100kb	119	55	60	301	48	57	43	144	277	48	102	103	28	200	116	45	387	111	130	121	178	37	333	138	79	530	282	272	56	3	130	100	300	52	343	359	202	275	303	385	48	13	39	141	26	269	162	29	57
1:LOH:100kb-1Mb	42	36	7	121	9	118	20	138	103	28	38	50	17	45	34	16	54	56	43	44	49	21	89	52	52	210	100	46	132	5	71	34	138	45	28	131	42	59	65	49	65	11	24	36	15	45	64	28	20
1:LOH:1Mb-10Mb	22	3	0	13	1	136	2	30	51	0	0	1	9	28	1	5	6	17	3	4	2	3	17	2	34	42	65	2	130	30	26	2	71	14	2	39	17	2	24	1	56	14	0	0	4	3	21	29	16
1:LOH:10Mb-40Mb	5	0	0	0	0	0	0	0	0	0	0	0	3	8	0	2	2	0	0	0	1	1	8	1	2	1	6	1	1	18	16	1	3	10	0	0	5	1	7	0	14	2	0	1	0	0	10	6	5
1:LOH:>40Mb	2	0	0	0	0	0	0	0	0	0	0	0	1	1	0	0	0	0	0	0	0	0	3	0	0	0	0	0	0	3	1	0	0	1	0	0	0	0	0	0	0	0	0	0	0	0	1	0	1
2:LOH:0-100kb	28	257	34	142	375	309	217	177	23	279	205	399	237	28	348	204	102	218	361	89	303	177	210	330	71	268	82	144	211	40	379	379	42	307	100	89	39	367	241	273	159	50	293	416	207	231	37	290	7
2:LOH:100kb-1Mb	12	109	16	11	129	95	98	146	2	111	53	112	121	4	86	75	39	68	93	15	59	97	64	80	78	18	14	32	82	72	115	118	12	125	26	7	11	83	58	87	107	77	123	95	105	46	12	136	5
2:LOH:1Mb-10Mb	6	33	6	12	29	12	39	102	4	40	30	31	36	2	33	34	12	21	30	0	31	35	31	27	68	6	6	23	10	20	19	43	4	27	15	6	4	27	27	21	15	20	32	42	20	22	4	19	2
2:LOH:10Mb-40Mb	2	3	2	3	2	0	2	1	0	4	0	2	2	2	2	4	1	3	4	0	3	2	2	1	1	2	1	2	1	2	0	6	2	2	2	4	1	1	2	1	4	5	5	3	2	1	1	5	0
2:LOH:>40Mb	2	2	2	1	2	2	2	0	2	1	2	3	2	1	2	1	2	2	2	0	1	2	1	2	0	1	2	1	1	1	2	2	1	2	1	1	2	2	2	2	1	1	1	1	2	2	2	1	1
3-4:LOH:0-100kb	10	197	28	43	354	471	238	91	8	288	81	268	348	8	155	207	58	133	227	74	139	230	94	157	27	77	17	41	346	280	299	212	19	275	24	29	11	125	87	86	260	267	276	227	243	77	19	378	5
3-4:LOH:100kb-1Mb	1	8	2	2	21	16	16	15	0	14	3	10	22	0	9	8	6	7	12	7	6	10	1	4	2	1	1	2	13	81	31	13	1	17	3	1	0	6	2	8	9	69	14	4	33	4	1	34	0
3-4:LOH:1Mb-10Mb	0	0	0	1	6	0	3	15	0	2	0	3	5	0	2	2	3	4	0	2	5	2	0	3	2	0	1	2	0	22	11	1	0	10	0	0	0	0	2	2	2	19	8	0	13	2	0	19	0
3-4:LOH:10Mb-40Mb	0	0	0	0	0	0	0	2	0	0	0	1	0	0	0	0	0	0	0	1	0	0	0	0	1	0	0	0	0	1	0	0	1	0	0	0	0	0	0	0	0	1	0	0	0	0	0	0	0
3-4:LOH:>40Mb	0	0	0	0	0	0	0	1	0	0	0	0	0	0	0	0	0	0	0	0	0	0	0	0	0	0	0	0	0	0	0	0	0	0	0	0	0	0	0	0	0	0	0	0	0	0	0	0	0
5-8:LOH:0-100kb	3	49	5	12	95	179	64	21	2	84	22	55	115	4	33	66	22	33	42	43	36	67	21	43	9	22	6	9	153	297	102	63	9	62	13	10	1	32	29	24	90	271	77	50	83	16	9	132	1
5-8:LOH:100kb-1Mb	0	0	1	0	0	0	1	4	0	1	0	0	3	0	0	0	2	1	0	0	0	2	2	0	1	0	0	0	0	10	2	2	0	0	0	0	0	1	0	0	1	6	3	1	1	0	0	2	0
5-8:LOH:1Mb-10Mb	0	0	0	0	0	0	0	1	0	0	0	0	0	0	0	2	0	0	4	5	1	0	0	0	0	0	0	0	0	0	0	0	0	0	0	0	0	1	0	0	0	0	0	0	0	0	0	0	0
5-8:LOH:10Mb-40Mb	0	0	0	0	0	0	0	0	0	0	0	0	0	0	0	0	0	0	0	3	0	0	0	0	0	0	0	0	0	0	0	0	0	0	0	0	0	0	0	0	0	0	0	0	0	0	0	0	0
5-8:LOH:>40Mb	0	0	0	0	0	0	0	0	0	0	0	0	0	0	0	0	0	0	0	1	0	0	0	0	0	0	0	0	0	0	0	0	0	0	0	0	0	0	0	0	0	0	0	0	0	0	0	0	0
9+:LOH:0-100kb	5	8	1	3	27	32	17	11	1	37	5	14	19	1	13	12	14	10	11	21	15	22	4	9	4	5	0	5	38	99	28	12	2	14	4	3	2	17	11	13	32	71	33	19	22	9	3	38	1
9+:LOH:100kb-1Mb	0	0	0	0	0	0	0	0	0	0	0	0	0	0	0	1	0	0	0	0	0	0	0	0	0	0	0	0	0	1	2	0	0	0	0	0	0	2	1	1	0	1	0	0	0	0	0	0	0
9+:LOH:1Mb-10Mb	0	0	0	0	0	0	0	0	0	0	0	0	0	0	0	0	0	0	1	0	0	0	0	0	0	0	0	0	0	0	0	0	0	0	0	0	0	0	0	0	0	0	0	0	0	0	0	0	0
0:homdel:0-100kb	2	5	3	18	5	89	7	31	82	3	0	5	9	4	3	3	6	2	2	11	4	0	2	6	7	156	5	2	54	2	6	21	15	3	3	39	2	3	7	3	13	4	0	9	4	3	8	4	2
0:homdel:100kb-1Mb	0	0	0	42	0	548	0	55	138	0	0	0	2	0	0	1	0	1	0	23	0	0	0	0	2	644	0	0	430	0	0	0	4	2	0	62	1	0	6	0	28	0	0	0	0	0	3	12	1
0:homdel:>1Mb	0	0	0	19	0	178	0	22	31	0	0	0	1	0	0	9	0	0	0	17	0	0	2	0	2	96	0	0	160	1	1	0	5	2	0	22	1	0	3	0	21	0	0	0	2	0	2	14	0
[truncated: 134 more columns]

## Sheet: SV44_class
Mutation Type	6068	10651	10734	10764	11099	11114	11119	11129	11141	11265	11532	11590	11830	11874	11926	12103	12571	12596	13019	13518	14261	14365	14862	14919	15126	15178	16000	16004	16176	16263	16311	16599	16677	16995	17135	17212	17392	17827	18210	10738-1042949	11452-1056021	12543-1081384	13104-1095757	13179-1096899	15917-1147612	5060-1034766	5287-1079625	5545-1079775	5656-1034950
chromoplexy_chain	9	11	0	0	0	0	0	6	0	0	0	3	4	0	1	0	0	3	3	0	0	12	22	10	0	0	0	0	9	0	0	21	0	3	0	0	0	0	0	0	0	17	10	13	3	0	0	0	9
chromoplexy_cycle	0	6	0	3	0	0	0	0	0	0	0	0	0	0	4	0	0	4	0	0	4	0	3	3	0	0	0	8	3	0	0	0	0	0	0	0	0	0	0	10	0	10	15	5	0	7	0	6	17
DEL<50kb_early	0	1	0	0	0	0	0	2	0	0	0	4	0	0	2	0	0	0	1	0	1	0	3	2	0	3	0	0	2	0	1	0	1	2	0	2	1	0	1	1	11	0	2	1	5	3	1	1	1
DEL<50kb_mid	5	11	2	17	0	2	0	35	0	2	0	4	14	0	9	6	0	8	8	0	15	7	4	8	3	10	0	7	31	0	5	13	3	27	1	5	0	0	0	4	17	8	8	7	26	6	7	38	3
DEL<50kb_late	2	3	0	8	0	0	0	20	1	1	0	1	6	0	1	0	0	1	9	0	4	0	1	0	0	7	0	4	28	1	0	3	0	10	0	2	0	0	1	2	3	0	2	0	6	1	0	22	1
DEL<500kb_early	0	0	0	0	0	0	0	0	0	0	0	0	0	0	0	0	0	0	0	0	1	0	0	0	0	0	0	0	0	0	0	0	0	0	0	0	0	0	0	0	0	1	1	2	1	1	0	0	0
DEL<500kb_mid	5	9	0	3	0	1	0	7	1	0	0	4	1	0	4	0	0	2	2	2	3	4	2	2	1	2	0	5	5	1	3	4	0	6	0	2	0	1	1	1	0	2	7	4	7	1	0	4	1
DEL<500kb_late	0	0	0	0	0	0	0	3	0	0	0	0	0	0	2	0	0	0	0	1	1	0	0	0	0	1	1	1	2	1	1	1	0	9	0	1	0	0	0	0	0	0	0	0	1	0	0	3	3
DEL<5Mb_early	0	1	0	0	0	1	0	0	0	0	0	1	0	0	0	0	0	1	0	0	0	2	1	1	0	0	0	3	0	0	0	0	0	0	0	0	0	0	0	0	0	0	0	0	0	0	0	0	0
DEL<5Mb_mid	6	5	1	1	0	3	1	12	0	0	0	3	4	0	4	2	0	7	9	1	13	7	9	9	1	4	0	14	15	0	2	11	0	12	0	3	0	0	0	1	1	6	4	11	13	2	4	21	3
DEL<5Mb_late	0	0	0	2	0	1	0	2	0	0	0	0	2	0	0	0	0	0	0	0	2	0	0	1	0	1	0	0	2	0	1	0	0	3	0	0	0	0	0	0	0	0	0	1	0	0	1	4	2
DEL>5Mb	6	15	0	1	1	12	0	24	0	0	0	2	6	0	2	1	0	3	7	0	18	3	28	2	4	3	0	9	17	1	12	63	0	15	1	3	0	0	1	0	0	5	2	4	24	2	0	22	10
DEL_fragile_site	0	0	0	0	0	1	0	2	0	0	0	0	3	0	0	1	0	0	0	0	2	0	2	0	0	1	0	1	2	1	0	3	0	1	0	0	0	0	0	0	0	0	0	1	1	1	0	5	0
unbal_INV	15	31	0	22	3	11	1	29	5	0	1	2	9	3	20	6	3	12	25	1	21	16	58	14	5	14	0	17	47	4	10	72	3	34	3	4	1	0	1	3	0	20	14	15	58	4	5	64	28
unbal_TRA	12	30	6	17	8	22	6	18	11	10	2	13	8	12	17	22	12	25	15	18	19	20	20	18	20	14	11	18	13	6	20	9	9	17	10	20	10	7	7	14	7	13	14	8	5	9	12	17	29
INV_FB	10	10	0	6	0	1	0	7	1	1	0	5	6	0	9	4	1	4	4	1	2	7	12	7	3	2	1	11	2	0	5	10	0	5	2	2	0	2	2	0	0	5	8	3	5	1	2	7	9
reciprocal_INV<100kb	0	0	0	0	0	0	0	0	0	0	0	0	0	0	0	0	0	0	0	0	0	0	0	0	0	0	0	0	0	0	0	0	0	0	0	0	0	0	0	0	0	0	0	0	0	2	0	2	0
reciprocal_INV>100kb	4	7	0	6	0	2	0	9	0	0	0	2	24	0	9	0	0	0	5	0	8	6	25	8	0	4	0	19	14	0	11	37	0	29	2	3	0	0	0	0	0	4	0	0	7	2	0	18	0
reciprocal_TRA	10	12	0	10	2	4	0	8	2	0	0	6	4	4	0	6	2	10	4	0	6	6	4	4	0	8	6	10	0	0	4	14	2	11	4	14	2	0	2	6	0	4	6	16	11	6	6	12	14
TD<50kb_early	0	1	0	1	0	0	0	0	0	0	0	2	0	1	1	1	0	0	1	0	0	0	0	1	0	0	0	1	0	0	1	1	0	1	0	0	0	0	0	0	0	0	0	0	0	0	0	1	0
TD<50kb_mid	2	4	0	3	2	1	4	3	0	0	0	3	3	3	3	6	0	2	0	0	1	1	5	2	2	0	0	5	0	0	0	1	0	2	0	2	1	0	1	3	0	2	0	5	0	0	2	3	0
TD<50kb_late	3	0	0	0	0	0	0	0	0	0	1	1	0	0	2	0	0	0	0	0	1	1	2	0	0	0	0	0	0	0	1	0	1	0	0	1	0	0	0	0	0	0	0	0	0	0	0	1	0
TD<500kb_early	0	0	0	1	0	0	0	0	0	0	0	0	0	0	0	0	0	0	0	0	0	0	0	0	0	2	0	0	0	0	0	0	0	1	0	0	0	0	0	0	0	0	0	0	0	0	0	1	0
TD<500kb_mid	2	2	0	1	1	1	0	2	0	0	2	2	2	0	1	1	0	1	0	1	3	3	1	0	1	2	1	4	0	0	0	3	0	2	0	0	0	0	0	0	0	0	0	0	3	1	0	6	0
TD<500kb_late	1	0	0	1	0	0	0	0	0	0	0	0	0	0	0	0	1	0	0	0	0	0	1	0	1	1	1	0	0	0	0	0	0	4	0	0	0	0	0	0	0	0	0	0	0	0	0	0	1
TD<5Mb_early	1	0	0	0	0	0	0	0	0	0	0	0	0	0	0	0	0	0	0	0	0	0	0	0	0	0	0	0	0	0	0	0	0	0	0	0	0	0	0	0	0	0	0	0	0	0	0	0	0
TD<5Mb_mid	5	1	0	3	2	0	1	7	0	0	0	0	1	1	1	1	0	0	2	0	5	0	4	0	1	2	0	2	2	0	1	8	0	9	0	0	0	1	0	0	0	0	0	3	5	0	1	9	0
TD<5Mb_late	0	0	0	0	0	0	0	0	0	0	0	0	1	0	0	0	0	1	2	0	0	0	0	0	0	0	0	0	1	1	0	1	0	2	0	0	0	0	0	0	0	1	0	0	3	0	0	3	0
TD>5Mb	1	4	0	2	0	1	0	17	0	0	0	0	0	0	2	1	0	0	5	0	12	6	10	1	0	5	0	3	5	1	4	18	0	13	0	1	1	0	1	1	2	3	1	3	13	1	0	10	0
TD_fragile_site	1	0	0	0	0	0	0	0	0	0	0	0	0	0	0	0	0	0	0	0	1	0	0	1	0	2	0	2	0	0	0	4	0	3	0	0	0	0	0	0	1	1	0	1	0	0	0	3	0
Dup_invDup<100kb	0	0	0	0	0	0	0	2	0	0	0	0	0	0	0	0	0	0	0	0	4	0	0	0	0	0	0	0	0	0	0	3	0	0	0	0	0	0	0	0	0	0	0	0	0	0	0	0	0
Dup_invDup>100kb	0	0	0	2	0	0	0	12	0	0	0	0	0	0	0	0	0	13	0	0	11	0	0	0	0	0	0	0	0	0	0	46	0	0	0	0	0	0	0	0	0	0	0	2	0	0	0	3	0
Dup_Trp_Dup	0	0	0	0	0	2	0	12	0	0	0	0	0	0	0	0	0	0	0	0	0	0	0	0	0	0	0	0	0	0	0	0	0	0	0	0	0	0	0	0	0	0	0	0	0	0	0	0	0
Loss_invDup<100kb	0	0	0	0	0	0	0	0	0	0	0	0	0	0	0	0	0	0	0	0	0	0	0	0	0	0	0	0	0	0	0	0	0	0	0	0	0	0	0	0	0	0	0	0	0	0	0	0	0
Loss_invDup>100kb	0	0	0	0	0	3	0	4	0	0	0	0	0	0	0	0	0	2	0	0	3	2	0	0	0	0	0	0	0	0	0	6	0	0	0	0	0	0	0	0	0	0	0	0	0	0	0	0	0
TI_ins_chain<5kb	0	0	0	0	0	0	0	0	0	0	0	0	0	0	0	0	0	0	0	0	0	0	0	0	0	0	0	0	0	0	0	0	0	0	0	0	0	0	0	0	0	0	0	0	0	0	0	0	0
TI_ins_chain>5kb	0	0	0	0	0	0	0	0	0	0	0	0	0	0	0	0	0	14	0	0	2	0	0	0	0	0	0	0	0	0	0	0	0	0	0	0	0	0	0	0	0	0	0	0	0	0	0	0	0
TI_ins_cycle>5kb	0	0	0	0	0	4	0	0	0	0	0	0	0	0	0	0	0	2	0	0	2	0	2	0	0	0	0	0	0	0	0	0	0	0	0	0	0	0	0	0	0	0	0	0	0	0	0	0	0
TI_ins_cycle<5kb	0	0	0	0	0	0	0	0	0	0	0	0	0	0	0	0	0	4	0	0	4	0	0	0	0	0	0	0	0	0	0	0	0	0	0	0	0	0	0	0	0	0	0	0	0	0	0	0	0
Trans+FB	0	0	0	0	0	0	0	0	0	0	0	0	0	0	0	0	0	6	0	0	8	0	0	0	0	0	0	0	0	0	0	3	0	0	0	0	0	0	0	0	0	0	0	3	0	0	0	0	0
Trans+INS	0	0	0	0	0	2	0	7	0	0	0	0	0	0	0	0	0	5	0	0	2	0	0	0	0	0	0	0	0	0	0	0	0	0	0	0	0	0	0	0	0	0	0	0	0	0	0	0	0
Trans+TD	7	10	0	0	0	7	0	12	0	0	0	0	0	0	2	0	0	4	2	0	6	5	33	7	0	0	0	6	7	0	0	40	0	2	0	7	0	0	0	0	0	11	16	19	3	0	3	17	28
local_3_jump	15	5	0	3	0	0	0	60	0	0	0	0	3	0	0	0	0	0	3	0	18	0	17	0	0	0	0	27	22	0	0	27	0	3	0	0	0	0	0	0	0	0	3	8	16	0	3	23	3
local_4_jump	0	0	0	4	0	0	0	16	0	0	0	0	0	0	0	0	0	4	0	0	0	0	0	0	0	0	0	0	0	0	0	0	0	0	0	0	0	0	0	0	0	0	0	0	0	0	0	0	0
[truncated: 134 more columns]
