# Supplementary material for: African-specific prostate cancer molecular taxonomy
Source: Research Square preprint supplement (doi:10.21203/rs.3.rs-1122619/v1), 2021-12-01
Supplement: Supplementary file 14 [file 66414037b444c0911a1adec2.xlsx]

## Sheet: Sheet1
	N0084	SMU087	N0002	SMU083	KAL0013	SMU061	N0067	N0053	UP2089	SMU068	UP2372	N0001	KAL0072	SMU030	SMU195	SMU098	SMU027	UP2370	SMU080	UP2267	KAL0091	N0081	UP2360	N0010	SMU167	UP2101	SMU104	KAL0074	SMU050	SMU076	UP2113	SMU062	UP2004	N0073	KAL0106	SMU107	SMU047	SMU029	KAL0078	N0085	KAL0022	KAL0054	SMU101	SMU097	SMU100	SMU032	SMU091	SMU089	SMU019
ACPP	12	0	2	0	2	1	1	12	12	12	0	0	2	0	0	0	0	12	0	0	2	12	0	0	12	12	12	0	0	0	12	0	0	0	0	0	0	0	0	0	0	0	0	0	0	0	0	0	0
AKR1C1	2	0	12	0	0	0	0	0	0	2	0	0	0	0	10	0	0	2	10	0	0	2	0	0	2	0	0	0	0	0	0	0	0	0	0	0	0	0	0	0	0	0	0	0	0	0	0	0	0
AKR1C2	2	0	12	0	0	0	0	0	0	2	0	0	0	0	10	0	0	2	0	0	0	2	0	0	2	0	0	0	0	0	0	0	0	0	0	0	0	0	0	0	0	0	0	0	0	0	0	0	0
AKT2	2	2	0	2	0	2	2	0	0	0	0	0	0	2	2	2	2	0	2	0	0	0	0	0	2	0	2	0	2	0	4	2	2	0	0	2	2	2	0	2	0	0	0	2	0	2	2	2	2
APC	6	0	0	0	0	0	0	0	0	12	0	0	2	0	0	0	2	2	2	0	4	2	2	0	0	2	0	0	0	0	0	0	0	0	2	0	0	0	0	0	0	0	0	0	0	0	0	0	0
ARID1B	2	0	12	0	0	0	0	0	6	5	2	0	0	0	0	0	0	0	12	0	2	4	0	0	12	0	0	0	0	0	0	0	0	0	0	0	0	0	0	0	0	0	0	0	0	0	0	0	0
ASXL1	0	2	2	2	0	2	2	12	0	0	0	0	0	2	2	2	2	0	0	0	0	0	0	0	2	0	6	12	2	0	4	2	2	0	0	2	2	2	0	0	0	0	0	2	0	2	2	2	2
ATAD1	0	1	0	0	2	0	0	2	2	2	0	2	0	2	0	2	2	9	0	0	0	2	2	9	0	2	0	0	2	9	0	0	0	2	2	0	0	0	0	12	0	0	12	0	0	0	0	0	2
ATAD2B	0	12	2	0	0	2	2	0	2	2	0	0	0	2	2	2	2	0	0	0	2	0	0	0	0	12	2	0	2	0	4	0	0	0	12	2	0	2	0	0	0	0	2	2	0	2	0	2	2
ATM	6	2	2	0	12	2	2	0	0	2	0	0	4	2	0	2	2	0	0	0	0	0	0	0	0	2	0	0	2	0	0	0	0	0	12	2	0	0	0	0	0	0	0	2	0	2	0	2	2
ATP2B2	12	12	12	12	0	12	12	0	0	12	0	0	0	12	0	12	12	12	0	0	0	0	0	0	10	12	0	0	12	0	0	0	0	2	0	0	0	12	0	0	0	0	0	12	0	12	0	12	12
ATRX	2	2	2	2	2	2	2	2	2	2	2	2	2	2	2	2	2	2	6	2	2	2	2	2	2	2	2	6	2	2	2	2	2	2	2	2	2	2	2	2	2	2	2	2	2	2	2	2	2
BCL3	2	0	2	2	0	2	2	0	12	0	0	0	0	2	2	2	2	0	2	0	0	0	0	0	2	4	2	0	2	0	0	2	2	0	0	2	2	2	0	2	4	0	0	2	0	2	2	2	2
BRAF	12	2	0	12	0	2	2	0	0	12	10	0	0	2	2	2	2	0	12	0	0	0	0	0	2	4	6	0	2	0	0	0	0	10	0	9	0	2	0	0	4	0	0	2	0	2	2	2	2
BRD4	2	2	0	2	0	2	12	0	0	12	0	0	4	2	2	2	2	0	2	0	0	0	0	0	0	2	2	0	2	0	4	0	2	0	0	2	0	2	0	0	0	0	0	2	0	2	2	2	2
CBX3	12	12	0	0	2	0	2	0	12	12	0	0	0	0	0	0	0	12	12	0	10	12	0	0	2	0	2	0	2	0	0	10	0	0	0	0	0	0	0	12	0	0	0	0	0	2	0	2	0
CDK12	12	2	2	2	0	2	6	0	0	2	0	0	0	2	2	2	2	0	2	0	0	0	0	0	0	0	0	2	2	2	0	0	2	0	0	2	0	2	0	0	0	0	0	2	0	2	0	2	2
CDKN1B	9	2	2	0	2	9	2	2	0	12	0	0	2	2	2	2	9	2	12	2	2	2	2	0	0	0	0	0	0	0	0	0	2	0	0	2	2	0	0	0	0	0	2	0	0	0	0	2	2
CFL1P1	0	12	0	0	2	0	0	2	2	2	0	2	0	2	0	2	2	2	0	0	0	2	2	9	0	2	0	0	9	2	0	0	0	2	2	0	0	0	0	12	0	0	12	0	0	0	0	0	2
CHD3	2	2	2	2	0	0	0	0	2	2	0	0	0	2	2	0	0	2	0	0	0	2	0	2	2	2	0	12	2	0	4	0	0	2	0	0	0	0	0	0	4	0	0	0	0	0	0	0	2
CHD4	0	0	0	0	2	2	2	2	0	12	0	0	6	2	2	2	2	0	0	0	0	2	2	0	0	0	0	0	2	0	4	0	0	0	0	2	12	2	0	0	0	0	0	0	0	0	0	2	2
CHRNB2	12	12	12	0	0	12	12	12	0	12	0	0	0	0	12	12	0	0	0	0	0	12	0	0	0	12	0	0	0	0	0	0	0	0	0	0	0	12	0	0	0	0	0	0	0	0	0	0	0
CIC	2	2	0	2	0	2	2	0	0	12	4	0	4	0	12	2	0	4	12	0	0	0	0	0	2	0	2	12	0	0	4	2	0	0	0	0	2	0	0	2	0	0	0	0	0	0	0	2	2
CNOT1	2	12	2	2	2	2	2	0	2	0	0	2	5	2	2	2	2	0	0	2	0	2	0	0	2	2	2	2	2	2	0	2	2	0	2	2	0	2	0	0	0	0	2	0	0	2	0	2	2
CSNK1E	0	2	2	2	0	2	2	0	0	2	0	0	8	2	2	2	2	0	0	0	0	2	0	0	2	2	0	0	2	0	0	2	2	2	0	2	0	2	0	0	0	0	0	2	0	2	2	2	2
CSPG4	2	2	0	2	0	0	0	0	0	2	0	0	0	2	0	0	0	0	0	0	0	2	0	0	0	2	0	0	0	0	10	2	0	0	0	0	0	0	0	0	0	10	0	0	0	0	0	0	0
CUL2	2	2	4	2	0	2	2	0	0	2	0	0	0	2	2	2	2	0	2	0	0	2	0	0	2	0	2	6	2	0	0	0	0	0	0	0	2	2	0	0	0	12	0	2	0	2	2	0	2
DDX4	0	2	0	2	0	2	2	2	12	2	2	0	2	0	2	2	2	0	2	0	0	0	2	0	0	2	2	2	2	0	0	0	2	0	2	0	0	0	0	0	2	0	0	0	0	0	0	0	0
ELK4	12	12	12	0	0	12	0	12	0	12	0	0	2	0	0	0	0	0	0	0	0	12	0	0	0	12	0	0	0	0	0	0	0	12	0	0	0	0	0	0	0	0	0	0	0	0	0	2	9
ELN	12	0	0	2	0	2	2	0	0	12	0	0	0	2	2	2	2	12	12	0	0	0	0	0	2	0	2	2	2	2	4	2	0	0	4	2	2	2	0	0	0	0	0	2	0	2	2	2	2
ERF	2	2	0	2	0	2	2	0	0	12	0	0	4	4	12	2	0	0	12	0	0	0	0	0	2	0	2	12	0	0	0	2	0	0	0	0	2	0	0	2	0	0	0	0	0	0	0	2	2
FIP1L1	2	1	2	2	0	0	2	12	0	10	0	0	0	0	0	0	0	0	0	0	0	0	0	0	0	12	0	0	2	0	0	0	0	0	0	0	0	0	0	0	0	0	0	0	0	0	0	0	0
FOXA1	2	0	0	0	2	5	4	0	0	6	0	8	6	0	0	0	0	0	0	0	0	12	0	2	0	0	12	0	8	0	5	0	0	0	4	0	0	0	0	0	0	0	0	0	0	8	0	0	0
FOXP1	0	0	0	0	2	0	0	0	12	12	2	0	2	0	2	0	0	12	12	2	2	0	2	4	12	12	0	12	0	4	0	0	2	0	2	12	0	0	0	0	0	2	0	0	0	0	0	0	0
GSTA2	12	12	0	12	10	0	0	0	2	12	0	0	2	0	2	0	0	0	12	0	0	0	0	0	0	0	10	10	0	0	0	0	0	0	2	0	12	0	0	0	0	0	0	0	0	0	0	0	0
GYPA	0	12	2	2	0	0	0	12	0	0	0	0	0	0	0	0	0	0	0	0	0	0	0	10	0	0	0	0	0	0	0	0	0	0	0	0	0	12	0	0	0	0	12	0	0	0	0	0	0
GZMB	2	12	12	0	0	0	0	0	0	2	0	0	2	0	0	0	0	0	12	0	0	0	0	2	10	0	0	0	0	0	2	0	0	0	0	0	0	0	0	0	0	0	0	0	0	0	0	0	0
GZMH	2	12	12	0	0	0	0	0	0	2	0	0	2	0	0	0	0	0	12	0	0	0	0	2	10	0	0	0	0	0	2	0	0	0	0	0	0	0	0	0	0	0	0	0	0	0	0	0	0
HIST1H1E	0	2	2	0	0	4	0	0	2	12	0	0	0	0	0	0	0	0	12	0	0	0	0	0	12	0	0	0	0	0	0	0	0	0	2	0	12	0	0	0	0	0	4	0	0	0	0	0	0
HLA-A	0	0	0	0	0	0	12	0	2	12	0	0	4	0	0	12	0	0	12	0	0	0	0	0	0	12	0	0	0	0	0	12	0	0	0	12	12	0	0	0	0	0	0	0	0	0	0	0	12
HLA-B	0	12	2	0	0	2	12	0	2	12	0	0	0	0	0	0	0	0	12	0	0	0	0	0	0	0	0	10	0	0	0	0	0	0	2	0	1	2	0	0	0	0	0	0	0	0	0	0	2
IKZF1	12	12	2	12	0	0	0	0	0	12	4	0	0	0	0	2	12	12	5	0	0	12	0	0	0	12	12	0	12	0	2	12	2	0	12	12	0	0	0	0	0	2	12	12	0	12	0	0	12
IL6ST	0	2	2	2	0	2	2	2	0	2	2	0	2	0	2	2	2	0	2	0	0	0	2	0	0	2	2	2	2	0	0	0	2	0	2	0	0	0	0	0	2	0	0	0	0	0	0	2	0
IRF4	2	0	12	2	0	12	0	0	0	12	0	0	0	12	0	12	0	0	12	2	0	2	0	0	0	2	0	0	12	0	4	0	0	0	0	0	2	0	0	2	0	0	0	12	0	2	0	12	12
ITFG1	2	12	0	0	2	0	0	0	0	0	0	12	0	2	0	0	10	0	0	2	0	2	0	0	2	12	2	0	0	0	0	0	0	0	0	2	0	0	0	0	0	0	0	0	0	0	2	0	2
IVL	12	12	12	12	0	12	0	12	2	12	0	0	5	0	0	12	0	0	0	0	0	12	0	0	0	12	0	0	12	0	0	0	0	0	0	0	0	0	0	2	0	0	0	0	0	0	0	0	0
JAK3	2	2	2	2	0	2	2	0	0	0	0	0	0	2	2	6	2	0	2	0	0	2	0	0	2	2	2	2	2	2	4	2	2	2	0	2	2	2	0	0	0	0	0	2	0	2	2	2	2
KCNH8	0	0	12	0	0	12	0	0	0	12	0	0	9	0	0	9	0	12	0	0	0	0	12	0	0	12	0	0	0	0	0	0	0	0	0	0	0	12	0	0	0	0	0	0	0	0	0	0	0
KDM6A	2	2	2	6	2	2	2	2	2	2	2	2	2	2	2	2	2	2	2	2	2	2	2	2	2	2	2	2	2	2	2	2	2	2	2	2	2	2	2	2	2	6	2	2	2	2	2	2	2
KIT	2	12	2	2	0	0	0	12	0	0	0	0	0	0	0	0	0	0	0	0	0	0	0	0	0	12	0	0	0	0	4	0	0	0	0	0	0	0	0	0	0	0	0	0	0	0	0	0	0
KMT2C	12	2	0	2	0	2	2	0	0	12	0	4	12	2	2	2	2	0	12	0	0	0	0	0	2	12	0	0	2	0	4	2	4	0	0	2	4	2	0	0	0	0	12	2	0	2	2	2	2
KRAS	0	0	0	0	0	0	0	2	0	12	0	0	0	0	0	0	0	0	12	0	0	2	2	0	0	2	0	0	0	0	4	0	0	0	0	0	0	0	0	0	0	0	0	0	0	0	0	0	2
KRTAP1-1	12	2	2	2	0	2	0	0	0	2	0	0	0	0	0	0	0	0	0	0	0	12	0	0	0	0	0	0	2	2	0	0	0	0	0	2	0	0	0	0	0	0	0	0	0	2	0	0	0
KRTAP1-3	12	2	2	2	0	2	0	0	0	2	0	0	0	0	0	0	0	0	0	0	0	12	0	0	0	0	0	0	2	2	0	0	0	0	0	2	0	0	0	0	0	0	0	0	0	2	0	0	0
KRTAP10-6	0	0	0	0	0	0	0	0	0	2	0	0	0	0	0	0	0	0	0	0	0	0	0	0	0	0	0	0	0	0	0	0	0	0	0	0	0	0	2	2	0	0	0	0	0	0	0	0	0
KRTAP5-11	0	0	0	0	12	0	12	0	0	12	0	0	0	0	0	0	0	0	2	0	0	0	0	0	0	0	0	0	0	0	0	0	0	0	0	0	0	12	0	0	0	10	0	10	0	0	0	0	0
LRP1B	2	1	0	10	1	0	1	0	2	2	2	0	12	0	0	2	0	0	12	0	2	0	1	0	0	2	0	0	0	1	2	0	2	0	1	0	0	0	10	0	10	2	0	10	0	0	0	0	0
MACROD2	2	9	12	12	0	0	1	12	0	9	0	0	12	2	2	0	0	0	2	0	0	2	0	12	0	12	0	0	2	2	2	0	0	0	1	12	0	1	0	0	0	10	0	0	0	0	0	0	2
MALAT1	0	12	2	2	12	2	12	0	0	12	0	2	0	2	2	2	2	0	0	0	8	0	0	2	0	0	0	12	2	0	8	2	2	0	12	2	2	2	0	0	0	0	0	2	0	2	2	2	2
MCF2L2	12	12	0	0	0	2	12	12	0	12	0	10	0	2	0	0	0	12	0	0	0	0	0	2	2	12	0	0	2	0	0	0	0	0	0	2	0	0	0	0	0	0	0	2	0	2	0	0	2
MFF	0	0	2	0	0	2	0	0	2	2	10	0	10	0	0	0	0	0	0	0	0	2	10	0	0	2	0	0	2	0	0	0	0	0	12	0	0	0	0	0	0	0	0	0	0	2	0	0	0
MGA	2	2	6	2	0	2	2	0	0	2	2	0	0	2	2	2	2	0	0	0	0	2	2	0	2	2	2	2	2	2	4	2	2	0	0	2	2	0	0	0	0	0	2	2	0	2	2	2	2
MIR4303	0	12	0	0	0	0	12	5	0	12	0	0	2	0	0	0	0	0	0	0	0	12	0	0	0	0	0	0	0	0	2	0	0	0	2	0	0	0	0	0	0	0	0	0	0	0	0	0	0
MPDU1	2	2	2	2	0	2	2	0	2	2	0	0	0	2	2	0	2	2	0	0	0	2	0	2	2	2	0	0	2	0	0	0	2	2	0	2	0	2	0	0	0	0	0	0	0	2	0	2	2
MTCH2	2	2	0	0	12	0	2	0	0	0	0	0	2	2	2	2	2	0	2	0	0	2	0	0	2	2	0	2	2	0	0	2	2	0	0	2	2	2	0	0	0	0	0	2	0	2	0	0	2
MTHFD1L	2	2	0	2	0	2	2	2	2	12	2	0	2	2	2	2	2	0	2	0	2	0	0	0	2	0	2	2	2	0	0	0	2	0	0	2	0	2	0	0	2	0	0	2	0	2	0	2	2
MTOR	2	2	2	2	0	2	0	0	0	2	2	0	0	2	2	2	2	0	0	0	0	0	0	0	0	2	2	0	2	0	0	0	0	0	0	2	0	2	0	2	0	0	0	2	0	2	0	2	2
MUC17	12	2	0	2	0	2	2	0	0	12	0	0	0	2	2	2	2	12	12	0	0	0	0	0	2	0	2	2	2	0	0	2	0	0	0	2	2	2	0	0	0	0	4	2	0	2	2	2	2
NDC80	2	0	2	0	0	2	0	0	0	12	0	0	12	2	2	2	2	0	0	0	0	2	0	2	0	12	0	0	2	0	0	0	2	2	0	2	2	0	0	0	12	0	0	2	0	2	0	0	2
NDST4	0	0	2	2	0	0	0	12	0	0	0	0	0	0	2	0	0	0	0	0	0	0	0	0	0	0	0	2	0	0	0	0	0	0	12	0	0	12	4	0	0	0	12	0	0	4	0	0	0
NEDD4L	2	12	2	0	1	2	1	0	2	12	2	2	0	9	2	0	2	0	12	0	2	2	2	0	0	0	0	0	0	0	0	0	0	2	2	0	0	0	0	0	0	12	0	0	0	0	0	0	2
NOTCH2	2	0	2	2	2	0	2	4	0	2	0	2	2	0	0	2	0	0	12	0	0	0	2	12	12	2	12	12	0	12	5	0	0	12	2	12	0	0	2	12	12	0	0	0	0	0	2	0	2
NTRK3	0	0	12	2	0	12	0	0	4	2	0	0	4	12	12	12	12	0	0	0	0	0	0	0	0	0	0	0	12	0	6	0	0	0	0	12	0	0	0	2	0	0	0	0	0	12	0	12	12
NUCKS1	12	12	0	0	0	0	0	12	0	12	0	0	2	0	0	0	0	0	0	0	0	12	0	0	0	12	0	0	0	0	0	0	0	0	2	0	0	0	0	0	0	0	0	0	0	0	0	2	2
OSBPL10	0	2	0	0	0	2	2	0	0	12	0	0	0	0	0	0	2	12	0	0	0	0	0	0	12	12	0	0	0	0	4	0	0	0	0	0	0	0	0	0	0	0	0	0	0	0	0	0	2
OTUD7A	2	0	12	2	0	0	12	0	0	2	2	0	12	4	0	0	0	0	0	0	0	2	0	0	0	0	0	0	0	0	0	0	0	0	12	0	0	0	0	0	0	12	0	0	0	0	0	0	0
PAPD5	2	2	2	2	2	2	2	0	2	0	0	0	2	2	2	2	2	0	0	2	0	2	0	0	2	12	2	0	2	2	0	2	2	0	2	2	0	2	0	0	0	0	0	2	0	2	0	2	2
PAPSS2	0	12	0	0	2	0	0	2	2	2	0	2	0	2	0	0	2	2	0	0	0	2	2	2	0	2	0	0	2	2	0	0	0	2	2	0	0	0	0	12	0	0	12	0	0	0	0	0	2
PBRM1	0	2	2	2	0	2	2	0	0	0	0	2	0	2	0	2	2	12	0	0	0	0	0	0	2	12	2	0	2	2	4	2	2	0	0	2	2	2	0	0	0	0	0	0	0	0	2	2	2
PDE4D	10	10	0	2	2	1	0	2	0	2	9	0	2	10	9	2	0	2	2	0	2	12	2	0	12	2	1	2	0	0	12	0	9	0	2	0	0	0	10	9	2	2	0	0	1	0	0	0	0
PDE4DIP	12	12	12	0	0	0	2	0	0	12	0	0	0	0	0	0	0	0	0	0	0	12	0	0	0	0	12	0	0	0	0	0	0	12	0	0	0	0	2	0	0	0	0	0	0	0	0	0	2
PDGFB	0	2	0	0	0	0	2	0	0	2	0	0	4	2	2	0	2	0	0	0	0	2	0	0	2	0	0	0	2	0	0	0	0	2	0	0	0	0	0	0	0	0	0	2	0	2	0	2	2
PIBF1	0	2	9	2	0	2	0	9	2	2	0	0	0	0	2	2	2	0	2	2	0	2	0	0	2	2	2	2	0	0	0	2	0	0	2	0	0	0	2	2	2	0	0	0	0	2	2	2	2
PIK3R1	0	0	0	2	2	0	0	4	2	2	2	0	2	0	2	2	0	6	2	0	0	2	2	0	12	0	12	2	0	0	0	0	0	0	2	0	0	0	0	2	2	2	0	0	0	0	0	0	0
PLXNA4	12	0	0	0	0	2	1	0	0	12	2	0	0	12	12	12	12	0	12	0	0	0	0	0	0	12	0	0	1	0	0	0	0	0	2	0	12	0	0	0	0	0	12	0	0	12	0	12	12
POLR2F	0	2	2	2	0	2	2	0	0	2	0	0	0	2	2	2	2	0	2	0	0	2	0	0	2	2	0	0	2	0	8	2	2	2	0	2	0	2	0	0	0	0	0	2	0	2	2	2	2
POMZP3	12	0	0	0	12	2	2	12	12	12	2	0	0	2	2	2	2	0	12	0	0	0	0	0	0	0	0	0	2	2	0	0	0	0	2	2	0	12	0	12	0	2	12	0	0	0	12	2	2
PRDM16	2	0	2	12	0	0	0	0	0	2	0	0	0	0	4	12	0	0	0	0	0	0	0	0	0	2	0	0	0	0	2	0	12	0	0	0	0	12	0	2	0	0	0	0	0	12	0	0	0
PSG6	2	9	0	2	0	2	0	2	2	12	0	0	0	0	0	0	0	0	0	0	2	0	0	0	2	0	2	0	0	0	2	2	0	2	0	0	0	0	0	2	0	0	0	0	0	0	0	0	0
PTEN	0	1	9	0	2	10	0	9	6	2	0	9	0	2	0	2	2	9	0	0	0	2	2	2	0	6	0	0	2	2	4	0	0	2	2	0	0	0	0	12	0	0	12	0	0	0	0	0	2
PTP4A1	0	2	12	0	0	2	2	0	2	2	0	0	0	0	2	2	2	0	0	0	2	0	12	0	0	0	2	10	2	0	0	0	0	0	0	2	0	0	0	0	0	0	0	0	0	2	2	0	2
PTPRD	0	9	12	10	0	12	1	0	2	1	10	0	1	0	0	0	9	2	10	2	0	10	10	9	0	10	0	2	10	0	2	0	0	0	12	0	0	0	0	0	0	0	0	10	0	0	0	0	0
RABGAP1L	0	10	12	2	0	10	9	12	0	12	0	0	9	9	2	10	0	0	0	0	2	12	0	0	2	12	0	12	2	0	0	0	2	12	0	0	10	2	0	0	0	0	0	0	0	2	0	2	2
RBFOX1	12	12	10	0	12	12	0	0	2	0	0	0	12	0	2	0	2	0	2	0	0	0	12	0	2	9	2	2	0	0	2	0	12	0	12	2	0	0	0	2	0	0	0	0	0	0	9	0	0
RERE	2	2	2	9	0	2	2	9	12	2	2	0	0	2	2	2	2	0	0	0	0	0	0	10	0	2	2	0	2	9	0	2	2	0	2	2	0	2	0	0	0	0	0	2	0	2	0	2	2
RGS7	2	0	12	0	12	12	0	12	2	2	12	0	1	0	0	0	2	0	2	0	0	0	12	0	2	1	2	2	9	0	2	0	0	0	12	0	0	0	0	2	0	0	0	0	0	0	0	0	0
RNF43	12	2	2	0	0	2	0	0	0	2	12	0	4	2	0	2	2	2	0	0	0	12	0	0	12	0	0	12	2	0	0	0	0	0	12	2	0	0	0	0	0	0	0	2	0	0	0	0	2
ROBO2	1	0	12	12	0	12	0	0	0	10	12	0	12	0	2	0	0	12	12	0	9	0	12	0	0	12	0	9	0	0	2	0	9	0	1	0	0	10	0	0	0	0	0	0	0	0	0	0	0
ROMO1	0	2	0	9	0	2	2	12	0	0	0	0	0	2	2	2	2	2	0	0	0	0	0	0	2	0	2	0	2	2	0	2	2	0	0	2	2	0	0	0	0	0	0	2	0	2	2	2	2
RPN1	12	12	0	2	0	12	12	12	0	12	0	0	0	2	2	0	0	12	0	0	4	12	0	0	0	12	0	0	2	0	0	2	0	0	0	0	0	2	0	0	0	0	0	0	0	0	0	0	2
RUNX1T1	12	12	12	0	12	0	0	12	12	12	0	12	12	0	2	12	0	12	12	0	0	12	12	0	0	12	0	12	0	0	6	0	0	12	12	0	0	12	0	0	0	0	0	0	0	0	0	0	0
SCAI	2	2	0	2	0	2	0	0	0	2	0	0	0	2	2	2	2	0	2	0	0	0	0	0	2	0	2	0	2	0	4	2	2	0	0	2	2	2	0	0	0	0	0	0	0	2	0	2	2
SENP3	2	2	2	2	0	2	2	0	2	2	0	0	0	2	2	0	2	2	0	0	0	2	0	2	2	2	0	0	2	0	0	0	2	2	0	2	0	2	0	0	0	0	0	0	0	2	0	2	2
SKIL	12	12	0	2	0	2	12	12	0	12	0	0	0	2	2	0	2	12	0	0	0	0	0	0	2	12	2	0	2	0	0	2	2	12	0	2	0	2	12	0	0	0	0	2	0	2	2	0	2
SLC45A3	12	12	0	0	0	0	0	12	0	12	0	10	2	0	0	0	0	0	0	0	0	12	0	0	0	12	10	0	0	0	0	0	0	12	0	0	0	0	0	0	0	0	0	0	0	0	0	2	2
SMARCA4	2	2	2	2	0	2	0	0	0	0	0	0	4	2	6	2	2	0	2	0	0	2	0	0	2	2	2	2	2	2	0	2	2	0	0	2	2	2	0	0	0	0	0	2	0	2	2	2	2
SORCS2	0	10	2	2	0	12	12	0	0	0	0	9	0	0	0	0	0	0	0	2	0	0	0	0	0	12	0	0	0	0	2	0	0	0	0	0	0	12	0	2	0	0	0	0	0	0	0	0	0
SPOP	5	0	6	2	4	2	2	0	0	6	0	0	4	2	0	2	0	2	4	0	0	12	4	0	0	0	0	0	2	0	0	0	6	0	0	2	0	2	4	0	0	0	0	2	0	2	0	0	2
STAT3	12	2	2	2	0	2	2	0	0	2	0	0	0	2	2	2	2	0	2	0	0	2	0	0	0	0	0	0	2	2	0	0	2	0	0	2	0	2	0	0	0	0	0	2	0	2	0	2	2
TDG	0	2	0	2	0	2	0	2	0	0	0	0	0	0	2	2	0	0	2	0	0	12	0	0	2	2	2	0	0	0	0	0	2	0	0	2	0	9	0	0	0	0	0	2	0	2	0	2	2
TENM4	12	12	0	12	12	12	12	0	0	12	0	0	2	12	12	12	12	0	12	0	0	0	0	0	12	12	0	0	12	0	0	0	0	0	0	12	0	12	0	0	0	0	0	12	0	2	12	12	12
THADA	0	2	2	0	0	2	2	0	2	2	2	0	0	2	2	2	2	0	0	10	9	0	2	0	0	0	12	0	2	0	2	0	0	0	0	2	0	2	0	0	0	0	0	2	0	2	0	0	2
TP53	2	2	2	6	0	6	2	0	6	2	0	0	0	2	2	0	2	6	0	0	0	6	0	2	2	6	0	0	2	0	4	0	2	2	4	2	0	2	0	0	0	4	0	0	0	2	0	2	2
TYRO3P	2	2	0	2	0	2	0	0	0	2	0	0	0	0	0	0	0	0	0	0	0	2	0	0	0	2	0	0	0	0	0	0	0	0	0	0	0	0	0	0	0	0	0	0	0	0	0	0	2
TYW1	12	2	0	2	0	2	0	0	0	1	10	0	0	2	2	2	2	12	12	10	0	0	0	0	9	0	2	0	2	2	0	2	0	0	0	9	9	9	10	0	0	10	0	2	0	2	9	2	2
UBXN8	2	2	2	12	2	2	2	2	2	2	0	2	2	2	2	0	0	2	2	2	0	2	2	0	2	2	2	0	2	2	0	12	2	2	10	0	2	0	0	2	0	0	0	0	0	2	0	0	2
UTRN	2	2	2	0	0	0	1	2	2	12	2	0	2	0	0	0	0	0	0	0	2	0	0	0	12	0	0	0	2	0	0	0	0	0	2	0	0	2	0	0	2	0	0	0	0	0	0	0	0
VWC2	12	12	12	12	0	0	0	0	0	12	0	0	1	0	0	2	0	12	12	0	0	0	12	0	0	12	0	0	0	0	2	0	2	0	12	0	0	0	0	0	0	10	12	0	0	0	0	0	12
WDR74	0	2	2	2	12	2	2	0	0	12	0	2	0	2	2	2	2	0	0	0	0	0	0	0	12	0	0	0	2	0	8	2	2	0	0	2	0	2	0	0	0	0	0	2	0	2	0	2	2
ZFP36L2	0	2	2	0	0	0	0	0	2	2	6	0	0	0	6	0	2	0	0	0	2	0	2	0	0	0	0	0	0	0	2	0	4	0	0	0	0	0	0	0	0	0	0	0	0	0	0	0	0
ZMYM3	2	2	6	2	2	2	2	2	2	2	2	2	6	2	2	2	2	2	2	2	2	2	2	2	2	2	2	2	6	2	2	2	2	2	2	6	2	2	2	2	2	2	2	2	2	2	2	2	2
ZNF443	2	2	2	2	0	2	0	0	0	0	12	0	0	2	2	2	2	0	2	0	0	0	0	0	2	2	2	2	2	2	0	2	2	0	12	2	2	2	0	0	0	0	0	2	0	2	2	2	2
ZNF492	0	0	12	10	12	0	0	0	2	0	12	0	12	2	9	0	0	0	2	0	0	2	12	0	2	0	2	2	0	0	2	0	0	0	12	0	0	0	0	2	0	0	0	2	0	0	2	0	2
ZNF814	2	2	0	2	0	2	2	0	0	12	0	0	0	2	2	2	2	0	2	0	0	0	0	0	2	0	2	0	2	0	0	2	0	0	0	2	2	0	0	2	0	0	0	2	0	2	2	2	2
NOTE:
Score 0	No mutations (color, #FFFFFF)
Score 1	Gain+SV±CDS (color, #A6CEE3)
Score 2	Loss (color, #1F78B4)
Score 3	CDS+(NC and/or SV) (color, #B2DF8A)
Score 4	CDS (color, #33A02C)
Score 5	Gain+(CDS and/or NC) (color, #FB9A99)
Score 6	Loss+(CDS and/or NC) (color, #E31A1C)
Score 7	Gain+SV+CDS±NC (color, #FDBF6F)
Score 8	NC (color, #FF7F00)
Score 9	Loss+SV±CDS (color, #CAB2D6)
Score 10	SV (color, #6A3D9A)
Score 12	Gain (color, #B15928)
[truncated: 134 more columns]
