# Supplementary material for: African-specific prostate cancer molecular taxonomy
Source: Research Square preprint supplement (doi:10.21203/rs.3.rs-1122619/v1), 2021-12-01
Supplement: Supplementary file 15 [file d5dcb248b6959a6065dc3397.xlsx]

## Sheet: gatk_calculatecontamination
Sample	Contamination	Error	qSignature
12333	0.930801	0.016292	tumour-normal mix-up at 0.25
TSH013	0.642753	0.00664438	tumour-normal mix-up at >0.25
KAL0068	0.628641	0.00616902	tumour-normal mix-up at >0.25
KAL0095	0.618607	0.00626689	tumour-normal mix-up at >0.25
N0031	0.608921	0.00627806	tumour-normal mix-up at >0.25
N0055	0.608085	0.00630082	tumour-normal mix-up at >0.25
10651-1042378	0.00255336	0.000242589	same as 10651
16599-1159140	0.00359747	0.000315777	same as 16599
11926	0	0	tumour-normal pair ok < 0.2
N0015	0	0	tumour-normal pair ok < 0.2
SMU030	0	0	tumour-normal pair ok < 0.2
SMU047	0	0	tumour-normal pair ok < 0.2
SMU094	0	0	tumour-normal pair ok < 0.2
SMU104	0	0	tumour-normal pair ok < 0.2
TSH008	0	0	tumour-normal pair ok < 0.2
UP2050	0	0	tumour-normal pair ok < 0.2
UP2360	0	0	tumour-normal pair ok < 0.2
SMU050	0.000277497	4.99055e-05	tumour-normal pair ok < 0.2
KAL053	0.000316178	4.88806e-05	tumour-normal pair ok < 0.2
UP2003	0.000647827	9.27964e-05	tumour-normal pair ok < 0.2
UP2119	0.000716022	7.75022e-05	tumour-normal pair ok < 0.2
UP2109	0.000915747	9.637e-05	tumour-normal pair ok < 0.2
16004	0.00111565	0.000177342	tumour-normal pair ok < 0.2
KAL070	0.00124698	9.72145e-05	tumour-normal pair ok < 0.2
UP2113	0.00130618	0.000115607	tumour-normal pair ok < 0.2
UP2133	0.00138764	0.000126863	tumour-normal pair ok < 0.2
UP2039	0.0014138	0.000137321	tumour-normal pair ok < 0.2
UP2116	0.00156111	0.000122069	tumour-normal pair ok < 0.2
UP2099	0.00160622	0.000119681	tumour-normal pair ok < 0.2
SMU109	0.00162273	0.000114678	tumour-normal pair ok < 0.2
10738-1042949	0.00184288	0.000282587	tumour-normal pair ok < 0.2
UP2048	0.00192827	0.000138914	tumour-normal pair ok < 0.2
12571	0.00197049	0.000219962	tumour-normal pair ok < 0.2
5958-1040497	0.00213116	0.000262561	tumour-normal pair ok < 0.2
13179-1096899	0.00226851	0.000268652	tumour-normal pair ok < 0.2
UP2153	0.00229705	0.00029675	tumour-normal pair ok < 0.2
13104-1095757	0.00229856	0.00029698	tumour-normal pair ok < 0.2
SMU080	0.00234577	0.000153999	tumour-normal pair ok < 0.2
5656-1034950	0.00240221	0.00025485	tumour-normal pair ok < 0.2
UP2264	0.00241767	0.000150574	tumour-normal pair ok < 0.2
5060-1034766	0.00242577	0.000301274	tumour-normal pair ok < 0.2
UP2037	0.00244499	0.000156607	tumour-normal pair ok < 0.2
SMU083	0.00245165	0.000169386	tumour-normal pair ok < 0.2
SMU062	0.00245237	0.000142527	tumour-normal pair ok < 0.2
5545-1079775	0.00253189	0.000316986	tumour-normal pair ok < 0.2
15917-1147612	0.00257164	0.000282471	tumour-normal pair ok < 0.2
6068	0.0027206	0.000307887	tumour-normal pair ok < 0.2
SMU079	0.00272481	0.000171792	tumour-normal pair ok < 0.2
5287-1079625	0.00274613	0.000292725	tumour-normal pair ok < 0.2
SMU068	0.00278396	0.000165382	tumour-normal pair ok < 0.2
UP2035	0.00281714	0.000153625	tumour-normal pair ok < 0.2
6359-1050886	0.00282034	0.000333409	tumour-normal pair ok < 0.2
UP2004	0.00287545	0.0001501	tumour-normal pair ok < 0.2
UP2089	0.0029621	0.000168256	tumour-normal pair ok < 0.2
UP2093	0.00303402	0.000175843	tumour-normal pair ok < 0.2
SMU064	0.00306962	0.000185101	tumour-normal pair ok < 0.2
11452-1056021	0.00310796	0.00034919	tumour-normal pair ok < 0.2
SMU183	0.00313765	0.000178967	tumour-normal pair ok < 0.2
UP2187	0.0031575	0.000167848	tumour-normal pair ok < 0.2
UP2351	0.00315783	0.000179596	tumour-normal pair ok < 0.2
UP2117	0.00349086	0.000165272	tumour-normal pair ok < 0.2
SMU106	0.00366218	0.000179792	tumour-normal pair ok < 0.2
5684-1079906	0.00387435	0.000385622	tumour-normal pair ok < 0.2
KAL0013	0.00405909	0.000181686	tumour-normal pair ok < 0.2
11114	0.00412315	0.000337066	tumour-normal pair ok < 0.2
10651	0.00418774	0.000335487	tumour-normal pair ok < 0.2
12543-1081384	0.00427769	0.000394101	tumour-normal pair ok < 0.2
UP2396	0.00432654	0.000170953	tumour-normal pair ok < 0.2
UP2041	0.00440986	0.000374242	tumour-normal pair ok < 0.2
SMU107	0.00460111	0.000201329	tumour-normal pair ok < 0.2
N0002	0.00463757	0.000248469	tumour-normal pair ok < 0.2
SMU097	0.00465702	0.000214507	tumour-normal pair ok < 0.2
11265	0.00468522	0.000393296	tumour-normal pair ok < 0.2
N0056	0.00469412	0.000228139	tumour-normal pair ok < 0.2
TSH005	0.00469976	0.000238024	tumour-normal pair ok < 0.2
N0007	0.00475443	0.000228996	tumour-normal pair ok < 0.2
5902-1035059	0.00475992	0.000443879	tumour-normal pair ok < 0.2
UP2317	0.00480755	0.000231059	tumour-normal pair ok < 0.2
17212	0.00481245	0.000449371	tumour-normal pair ok < 0.2
SMU161	0.00484425	0.000209525	tumour-normal pair ok < 0.2
SMU019	0.0048591	0.000227106	tumour-normal pair ok < 0.2
SMU087	0.00492693	0.000212609	tumour-normal pair ok < 0.2
UP2159	0.00494491	0.000189909	tumour-normal pair ok < 0.2
SMU039	0.0049487	0.000212945	tumour-normal pair ok < 0.2
N0053	0.00497012	0.000234506	tumour-normal pair ok < 0.2
UP2123	0.0049759	0.000285318	tumour-normal pair ok < 0.2
SMU089	0.00499337	0.000208902	tumour-normal pair ok < 0.2
11532	0.00501265	0.000383705	tumour-normal pair ok < 0.2
SMU027	0.00511072	0.000234333	tumour-normal pair ok < 0.2
SMU098	0.00516329	0.000249785	tumour-normal pair ok < 0.2
UP2258	0.0052	0.000330056	tumour-normal pair ok < 0.2
N0010	0.00523601	0.000258865	tumour-normal pair ok < 0.2
UP2115	0.00525939	0.000192123	tumour-normal pair ok < 0.2
13518	0.00526335	0.00037002	tumour-normal pair ok < 0.2
N0001	0.00527462	0.00023123	tumour-normal pair ok < 0.2
N0067	0.00530254	0.00024287	tumour-normal pair ok < 0.2
N0059	0.00532026	0.000259598	tumour-normal pair ok < 0.2
SMU061	0.00533036	0.000212807	tumour-normal pair ok < 0.2
KAL0054	0.00533695	0.000208727	tumour-normal pair ok < 0.2
SMU195	0.0053376	0.000196496	tumour-normal pair ok < 0.2
16311	0.00538312	0.000312947	tumour-normal pair ok < 0.2
KAL0091	0.00539007	0.000221475	tumour-normal pair ok < 0.2
KAL0074	0.00544155	0.000223414	tumour-normal pair ok < 0.2
14919	0.00546139	0.000413887	tumour-normal pair ok < 0.2
UP2063	0.00553296	0.000249252	tumour-normal pair ok < 0.2
KAL0022	0.00554732	0.000210449	tumour-normal pair ok < 0.2
UP2330	0.00555753	0.000261401	tumour-normal pair ok < 0.2
SMU091	0.00556708	0.000211221	tumour-normal pair ok < 0.2
N0048	0.00560698	0.000230965	tumour-normal pair ok < 0.2
KAL0072	0.00561845	0.000218586	tumour-normal pair ok < 0.2
SMU100	0.00562012	0.000259922	tumour-normal pair ok < 0.2
N0061	0.00562648	0.000281106	tumour-normal pair ok < 0.2
SMU029	0.00566118	0.000237968	tumour-normal pair ok < 0.2
UP2380	0.00577379	0.000258993	tumour-normal pair ok < 0.2
SMU141	0.0058246	0.000223961	tumour-normal pair ok < 0.2
UP2049	0.00583975	0.000240221	tumour-normal pair ok < 0.2
10764	0.00584726	0.00043747	tumour-normal pair ok < 0.2
UP2100	0.00615	0.000227083	tumour-normal pair ok < 0.2
SMU101	0.00619902	0.000246195	tumour-normal pair ok < 0.2
SMU157	0.00622106	0.000236528	tumour-normal pair ok < 0.2
15126	0.00638197	0.000477431	tumour-normal pair ok < 0.2
SMU159	0.00639226	0.000259566	tumour-normal pair ok < 0.2
TSH003	0.00644199	0.000287909	tumour-normal pair ok < 0.2
11590	0.00649111	0.00041262	tumour-normal pair ok < 0.2
16000	0.0065459	0.000363882	tumour-normal pair ok < 0.2
11119	0.00657587	0.000493796	tumour-normal pair ok < 0.2
SMU196	0.00659022	0.000248814	tumour-normal pair ok < 0.2
SMU032	0.00660571	0.000286716	tumour-normal pair ok < 0.2
11099	0.00663505	0.000422677	tumour-normal pair ok < 0.2
SMU041	0.00669075	0.000250159	tumour-normal pair ok < 0.2
SMU167	0.00669575	0.000242266	tumour-normal pair ok < 0.2
BRA07	0.00679791	0.00038829	tumour-normal pair ok < 0.2
12596	0.00680888	0.000448264	tumour-normal pair ok < 0.2
N0088	0.0068507	0.000287935	tumour-normal pair ok < 0.2
KAL0004	0.0069002	0.000248907	tumour-normal pair ok < 0.2
16677	0.00692132	0.000408738	tumour-normal pair ok < 0.2
18210	0.00693729	0.000440103	tumour-normal pair ok < 0.2
16995	0.00696283	0.000475248	tumour-normal pair ok < 0.2
TSH012	0.00698018	0.000282687	tumour-normal pair ok < 0.2
UP2103	0.00706904	0.000270973	tumour-normal pair ok < 0.2
14261	0.00710749	0.000446837	tumour-normal pair ok < 0.2
KAL0043	0.00736338	0.00027297	tumour-normal pair ok < 0.2
TSH001	0.00739453	0.00029081	tumour-normal pair ok < 0.2
KAL0078	0.00745156	0.000254466	tumour-normal pair ok < 0.2
11830	0.00771194	0.000514532	tumour-normal pair ok < 0.2
15178	0.00784254	0.000534459	tumour-normal pair ok < 0.2
UP2101	0.00784512	0.000295385	tumour-normal pair ok < 0.2
14862	0.00818281	0.00051472	tumour-normal pair ok < 0.2
UP2092	0.00821901	0.000309709	tumour-normal pair ok < 0.2
SMU076	0.00822501	0.000297318	tumour-normal pair ok < 0.2
14365	0.00825783	0.000525192	tumour-normal pair ok < 0.2
UP2372	0.00858821	0.000286636	tumour-normal pair ok < 0.2
KAL0101	0.00863327	0.000293068	tumour-normal pair ok < 0.2
SMU142	0.00876343	0.000282636	tumour-normal pair ok < 0.2
UP2267	0.00888626	0.000296794	tumour-normal pair ok < 0.2
SMU132	0.00896104	0.000331751	tumour-normal pair ok < 0.2
N0078	0.0091099	0.000304688	tumour-normal pair ok < 0.2
17827	0.00915366	0.000533466	tumour-normal pair ok < 0.2
N0077	0.0093832	0.000339486	tumour-normal pair ok < 0.2
KAL0107	0.00942852	0.000451068	tumour-normal pair ok < 0.2
BRA13	0.0095418	0.000318098	tumour-normal pair ok < 0.2
BRA05	0.00980985	0.000475414	tumour-normal pair ok < 0.2
KAL0106	0.0101735	0.000338426	tumour-normal pair ok < 0.2
17135	0.0101781	0.000593361	tumour-normal pair ok < 0.2
N0073	0.0102422	0.000330888	tumour-normal pair ok < 0.2
SMU111	0.0105968	0.000312486	tumour-normal pair ok < 0.2
N0084	0.0106362	0.000305756	tumour-normal pair ok < 0.2
UP2213	0.0107083	0.00033762	tumour-normal pair ok < 0.2
N0085	0.0107252	0.000360238	tumour-normal pair ok < 0.2
UP2142	0.0111711	0.000328433	tumour-normal pair ok < 0.2
16263	0.0112657	0.000558339	tumour-normal pair ok < 0.2
17392	0.0117269	0.000683847	tumour-normal pair ok < 0.2
KAL0104	0.0117374	0.00048578	tumour-normal pair ok < 0.2
11129	0.0119364	0.000615633	tumour-normal pair ok < 0.2
16176	0.0123067	0.00065982	tumour-normal pair ok < 0.2
N0087	0.0123662	0.000633953	tumour-normal pair ok < 0.2
UP2370	0.0124465	0.000379307	tumour-normal pair ok < 0.2
10734	0.0132905	0.000471373	tumour-normal pair ok < 0.2
11874	0.0137052	0.000608606	tumour-normal pair ok < 0.2
SMU177	0.013807	0.000392262	tumour-normal pair ok < 0.2
16599	0.0144345	0.0007553	tumour-normal pair ok < 0.2
12103	0.0155304	0.000590614	tumour-normal pair ok < 0.2
SMU200	0.0161348	0.000475126	tumour-normal pair ok < 0.2
UP2197	0.0170326	0.000481832	tumour-normal pair ok < 0.2
11141	0.0180914	0.00081728	tumour-normal pair ok < 0.2
13019	0.0186486	0.000703428	tumour-normal pair ok < 0.2
BRA04	0.0207637	0.000684166	tumour-normal pair ok < 0.2
N0081	0.0252835	0.000965278	tumour-normal pair ok < 0.2
BRA10	0.0370396	0.00102197	tumour-normal pair ok < 0.2
BRA15	0.0619482	0.0013533	tumour-normal pair ok < 0.2
BRA08	0.126707	0.00286346	tumour-normal pair ok < 0.2
*contamination fraction=1
*FPs due to contamination removed in mutect2

## Sheet: qsignature_results
id	sample	coverage	1	2	3	4	5	6	7	8	9	10	11	12	13	14	15	16	17	18	19	20	21	22	23	24	25	26	27	28	29	30	31	32	33	34	35	36	37	38	39	40	41	42	43	44	45	46	47
1	10651-1042378-B	1419553	0	0.035184	0.0358089	0.0378965	0.282182	0.281357	0.259442	0.256378	0.255196	0.252964	0.257825	0.256723	0.252987	0.252018	0.257651	0.256136	0.256795	0.259168	0.254252	0.252252	0.257274	0.254976	0.257388	0.256894	0.255558	0.254691	0.256482	0.254658	0.256653	0.256576	0.256441	0.254744	0.258642	0.2577	0.256238	0.253088	0.25664	0.255229	0.258796	0.258224	0.257838	0.255822	0.257562	0.254077	0.256459	0.25462	0.256616
2	10651-1042378-T	1426520	0.035184	0	0.0382465	0.0249153	0.282103	0.281003	0.260044	0.256423	0.256043	0.253314	0.25794	0.256484	0.253258	0.252033	0.257737	0.255816	0.257176	0.259021	0.254653	0.252168	0.257847	0.25508	0.257694	0.256843	0.255527	0.254532	0.257068	0.2549	0.25674	0.256155	0.25687	0.254708	0.258856	0.257497	0.256489	0.252524	0.256769	0.255068	0.259466	0.258552	0.258133	0.255691	0.258304	0.254176	0.256937	0.254601	0.257158
3	10651-B	1416560	0.0358089	0.0382465	0	0.0399438	0.282847	0.282144	0.260478	0.257571	0.255892	0.253773	0.258596	0.257568	0.253869	0.252916	0.25826	0.256864	0.257514	0.25993	0.254986	0.253214	0.25772	0.255689	0.258679	0.258244	0.255712	0.255055	0.257115	0.255465	0.257386	0.257386	0.257164	0.255591	0.259199	0.258344	0.256831	0.253842	0.257219	0.256039	0.260041	0.259395	0.258566	0.256761	0.258262	0.254984	0.25711	0.255287	0.257853
4	10651-T	1425043	0.0378965	0.0249153	0.0399438	0	0.282128	0.281043	0.260593	0.2571	0.256301	0.253508	0.25811	0.256694	0.253651	0.25247	0.257805	0.255894	0.257346	0.259179	0.254862	0.252454	0.25795	0.255188	0.258454	0.257699	0.255165	0.254224	0.257296	0.255182	0.256999	0.25644	0.257075	0.254967	0.259076	0.257656	0.256687	0.252713	0.256968	0.255266	0.260193	0.259218	0.258451	0.256087	0.258564	0.254507	0.257131	0.254566	0.257898
5	10734-B	1423737	0.282182	0.282103	0.282847	0.282128	0	0.0287502	0.285397	0.282	0.2834	0.280852	0.281383	0.280123	0.281458	0.280426	0.282608	0.280962	0.281454	0.283064	0.281862	0.279788	0.283722	0.281156	0.283067	0.282428	0.280991	0.280131	0.281899	0.280166	0.280806	0.280562	0.279184	0.277232	0.284003	0.282897	0.282885	0.279343	0.281155	0.279608	0.284127	0.28349	0.280082	0.277976	0.281989	0.278255	0.283775	0.281285	0.281964
6	10734-T	1426538	0.281357	0.281003	0.282144	0.281043	0.0287502	0	0.284748	0.281035	0.282719	0.279795	0.280468	0.278942	0.280546	0.279294	0.281777	0.279864	0.280665	0.282119	0.281042	0.278534	0.28303	0.280024	0.282274	0.281427	0.279905	0.278926	0.281153	0.279164	0.279984	0.27944	0.278302	0.275938	0.283206	0.281937	0.282083	0.277968	0.280446	0.278478	0.283321	0.282478	0.279309	0.276871	0.28136	0.277125	0.282995	0.280054	0.281131
7	10738-1042949-B	1406570	0.259442	0.260044	0.260478	0.260593	0.285397	0.284748	0	0.0334326	0.260617	0.258835	0.254663	0.253649	0.257069	0.256308	0.254418	0.253179	0.254709	0.257434	0.256248	0.254512	0.256303	0.25426	0.256257	0.255826	0.254673	0.254044	0.255104	0.253657	0.253548	0.253774	0.255525	0.254067	0.256662	0.255839	0.253809	0.25113	0.254676	0.252463	0.256666	0.256406	0.256871	0.255165	0.255133	0.252135	0.258911	0.257441	0.254925
8	10738-1042949-T	1423712	0.256378	0.256423	0.257571	0.2571	0.282	0.281035	0.0334326	0	0.257729	0.255232	0.251159	0.249804	0.253611	0.25251	0.251202	0.249469	0.251477	0.254164	0.253002	0.250597	0.25333	0.250543	0.253046	0.252225	0.251009	0.250138	0.251989	0.249956	0.250125	0.250082	0.252125	0.25016	0.253533	0.252267	0.250878	0.247186	0.251672	0.248709	0.253584	0.252993	0.253635	0.251324	0.252409	0.248352	0.255771	0.25368	0.251538
9	10764-B	1415327	0.255196	0.256043	0.255892	0.256301	0.2834	0.282719	0.260617	0.257729	0	0.0332559	0.25805	0.257002	0.255686	0.254815	0.256697	0.255376	0.258878	0.261096	0.254761	0.252945	0.258163	0.256006	0.257349	0.25694	0.257725	0.256973	0.256327	0.254742	0.257106	0.25712	0.256196	0.254625	0.259323	0.258503	0.257063	0.254656	0.257457	0.256726	0.258659	0.258283	0.258198	0.256348	0.258492	0.255323	0.259393	0.257498	0.257572
10	10764-T	1425104	0.252964	0.253314	0.253773	0.253508	0.280852	0.279795	0.258835	0.255232	0.0332559	0	0.255516	0.253997	0.253187	0.251917	0.254421	0.252527	0.25664	0.258637	0.252444	0.249861	0.256056	0.253124	0.255045	0.254222	0.254897	0.253978	0.254238	0.252007	0.254717	0.254291	0.253753	0.251543	0.257143	0.255759	0.255025	0.251436	0.255229	0.253845	0.256375	0.255534	0.255978	0.253524	0.256589	0.252338	0.257132	0.254429	0.255412
11	11099-B	1423452	0.257825	0.25794	0.258596	0.25811	0.281383	0.280468	0.254663	0.251159	0.25805	0.255516	0	0.0281067	0.253889	0.252663	0.250644	0.248861	0.251403	0.253547	0.251507	0.24924	0.253472	0.25078	0.251106	0.250336	0.247578	0.24673	0.252804	0.250849	0.248712	0.248587	0.252259	0.250372	0.251919	0.25086	0.250284	0.246163	0.251254	0.249942	0.251879	0.251137	0.254188	0.251864	0.251916	0.247958	0.255949	0.253651	0.253141
12	11099-T	1427313	0.256723	0.256484	0.257568	0.256694	0.280123	0.278942	0.253649	0.249804	0.257002	0.253997	0.0281067	0	0.252566	0.251077	0.249346	0.247181	0.250202	0.252249	0.25019	0.2474	0.252416	0.249134	0.249852	0.248873	0.245974	0.245002	0.251778	0.249418	0.247524	0.247092	0.250957	0.248513	0.250804	0.24945	0.249205	0.244207	0.250147	0.248271	0.2507	0.249731	0.25301	0.250286	0.250954	0.246299	0.254834	0.251886	0.251932
13	11114-B	1424500	0.252987	0.253258	0.253869	0.253651	0.281458	0.280546	0.257069	0.253611	0.255686	0.253187	0.253889	0.252566	0	0.0255189	0.255894	0.25417	0.253596	0.255673	0.254525	0.252232	0.25704	0.254416	0.254572	0.253964	0.254776	0.253978	0.254909	0.252893	0.252863	0.25271	0.253836	0.25198	0.255559	0.254457	0.255636	0.252023	0.254616	0.253282	0.254806	0.254273	0.254452	0.252154	0.256007	0.251988	0.252908	0.250693	0.255079
14	11114-T	1427359	0.252018	0.252033	0.252916	0.25247	0.280426	0.279294	0.256308	0.25251	0.254815	0.251917	0.252663	0.251077	0.0255189	0	0.254847	0.252776	0.252629	0.254608	0.253463	0.25072	0.256132	0.253118	0.253555	0.252774	0.253408	0.252503	0.253973	0.251594	0.251774	0.251411	0.252757	0.250544	0.254518	0.2532	0.254735	0.250484	0.253683	0.251901	0.253793	0.253038	0.253552	0.250825	0.25511	0.250505	0.251939	0.249324	0.254092
15	11119-B	1421262	0.257651	0.257737	0.25826	0.257805	0.282608	0.281777	0.254418	0.251202	0.256697	0.254421	0.250644	0.249346	0.255894	0.254847	0	0.0316537	0.249874	0.252407	0.25406	0.252045	0.252207	0.249755	0.251306	0.250756	0.251277	0.250477	0.250909	0.249061	0.25036	0.250298	0.250343	0.24863	0.250508	0.249523	0.251891	0.248585	0.250356	0.249765	0.253083	0.252493	0.255286	0.253234	0.252535	0.248938	0.25796	0.255934	0.251555
16	11119-T	1426053	0.256136	0.255816	0.256864	0.255894	0.280962	0.279864	0.253179	0.249469	0.255376	0.252527	0.248861	0.247181	0.25417	0.252776	0.0316537	0	0.248394	0.250747	0.252458	0.249905	0.250753	0.247648	0.249801	0.248839	0.249377	0.248342	0.249495	0.247199	0.248804	0.248399	0.248678	0.246445	0.249086	0.247679	0.25046	0.246231	0.248864	0.247705	0.251459	0.25064	0.253802	0.251359	0.251306	0.24693	0.256555	0.253791	0.249974
17	11129-B	1420063	0.256795	0.257176	0.257514	0.257346	0.281454	0.280665	0.254709	0.251477	0.258878	0.25664	0.251403	0.250202	0.253596	0.252629	0.249874	0.248394	0	0.0393168	0.254078	0.252121	0.252165	0.249829	0.252808	0.252343	0.249385	0.248754	0.25106	0.249333	0.249543	0.249372	0.250438	0.248791	0.251934	0.251031	0.252091	0.248808	0.252252	0.249893	0.25322	0.25272	0.252365	0.25028	0.251654	0.24818	0.254515	0.252594	0.250242
18	11129-T	1424341	0.259168	0.259021	0.25993	0.259179	0.283064	0.282119	0.257434	0.254164	0.261096	0.258637	0.253547	0.252249	0.255673	0.254608	0.252407	0.250747	0.0393168	0	0.256331	0.254208	0.254686	0.252147	0.255101	0.254461	0.251584	0.250764	0.253054	0.25107	0.25179	0.251267	0.252327	0.250519	0.254516	0.253278	0.25432	0.250868	0.254318	0.252026	0.255644	0.254907	0.254342	0.252233	0.253882	0.250337	0.256834	0.254583	0.252428
19	11141-B	1420453	0.254252	0.254653	0.254986	0.254862	0.281862	0.281042	0.256248	0.253002	0.254761	0.252444	0.251507	0.25019	0.254525	0.253463	0.25406	0.252458	0.254078	0.256331	0	0.0313925	0.255608	0.253197	0.253545	0.253088	0.253662	0.252827	0.255033	0.253181	0.252509	0.252404	0.252482	0.250747	0.252521	0.251607	0.254782	0.251419	0.252596	0.250765	0.252465	0.251923	0.255114	0.25315	0.253557	0.24997	0.254844	0.252555	0.255025
20	11141-T	1426869	0.252252	0.252168	0.253214	0.252454	0.279788	0.278534	0.254512	0.250597	0.252945	0.249861	0.24924	0.2474	0.252232	0.25072	0.252045	0.249905	0.252121	0.254208	0.0313925	0	0.253704	0.250485	0.251548	0.250677	0.251163	0.250058	0.253238	0.25077	0.250422	0.24983	0.250322	0.247823	0.250589	0.249214	0.252921	0.248253	0.250628	0.248005	0.250406	0.2495	0.253221	0.250591	0.251863	0.24708	0.252938	0.249723	0.253014
21	11265-B	1418774	0.257274	0.257847	0.25772	0.25795	0.283722	0.28303	0.256303	0.25333	0.258163	0.256056	0.253472	0.252416	0.25704	0.256132	0.252207	0.250753	0.252165	0.254686	0.255608	0.253704	0	0.0323862	0.253514	0.253048	0.25382	0.253093	0.253478	0.251795	0.254114	0.254105	0.251831	0.250238	0.251515	0.25069	0.251431	0.248357	0.251968	0.250963	0.254874	0.254329	0.254568	0.25265	0.252552	0.249154	0.257613	0.255758	0.253699
22	11265-T	1426477	0.254976	0.25508	0.255689	0.255188	0.281156	0.280024	0.25426	0.250543	0.256006	0.253124	0.25078	0.249134	0.254416	0.253118	0.249755	0.247648	0.249829	0.252147	0.253197	0.250485	0.0323862	0	0.251196	0.250254	0.250811	0.249829	0.25122	0.248915	0.251736	0.251337	0.249219	0.24691	0.24917	0.247797	0.249265	0.24498	0.24973	0.247816	0.25245	0.25149	0.252242	0.249653	0.250612	0.246033	0.255448	0.252638	0.251199
23	11452-1056021-B	1421039	0.257388	0.257694	0.258679	0.258454	0.283067	0.282274	0.256257	0.253046	0.257349	0.255045	0.251106	0.249852	0.254572	0.253555	0.251306	0.249801	0.252808	0.255101	0.253545	0.251548	0.253514	0.251196	0	0.0300281	0.253001	0.252239	0.252649	0.250865	0.251233	0.25114	0.252423	0.250618	0.254436	0.253461	0.252648	0.24936	0.251293	0.252463	0.253834	0.25329	0.254318	0.252294	0.253227	0.249532	0.257333	0.25545	0.252382
24	11452-1056021-T	1424570	0.256894	0.256843	0.258244	0.257699	0.282428	0.281427	0.255826	0.252225	0.25694	0.254222	0.250336	0.248873	0.253964	0.252774	0.250756	0.248839	0.252343	0.254461	0.253088	0.250677	0.253048	0.250254	0.0300281	0	0.25222	0.251252	0.252309	0.250194	0.250742	0.250448	0.251853	0.249688	0.253987	0.252673	0.25227	0.248274	0.250847	0.251522	0.253235	0.252486	0.253861	0.251474	0.252866	0.248599	0.256985	0.254561	0.251724
25	11532-B	1424605	0.255558	0.255527	0.255712	0.255165	0.280991	0.279905	0.254673	0.251009	0.257725	0.254897	0.247578	0.245974	0.254776	0.253408	0.251277	0.249377	0.249385	0.251584	0.253662	0.251163	0.25382	0.250811	0.253001	0.25222	0	0.0264108	0.250142	0.247931	0.250099	0.249678	0.253946	0.251766	0.2542	0.252732	0.252275	0.247985	0.251281	0.249101	0.252728	0.251648	0.25428	0.251774	0.252339	0.247963	0.255805	0.25321	0.251769
26	11532-T	1426672	0.254691	0.254532	0.255055	0.254224	0.280131	0.278926	0.254044	0.250138	0.256973	0.253978	0.24673	0.245002	0.253978	0.252503	0.250477	0.248342	0.248754	0.250764	0.252827	0.250058	0.253093	0.249829	0.252239	0.251252	0.0264108	0	0.249498	0.247045	0.249405	0.248819	0.25306	0.250663	0.253512	0.251919	0.251517	0.246851	0.250461	0.248163	0.251994	0.250872	0.253513	0.250845	0.251662	0.246976	0.255075	0.252138	0.25099
27	11590-B	1418545	0.256482	0.257068	0.257115	0.257296	0.281899	0.281153	0.255104	0.251989	0.256327	0.254238	0.252804	0.251778	0.254909	0.253973	0.250909	0.249495	0.25106	0.253054	0.255033	0.253238	0.253478	0.25122	0.252649	0.252309	0.250142	0.249498	0	0.0307572	0.250387	0.250332	0.251008	0.249433	0.252213	0.251273	0.253325	0.250256	0.25253	0.25141	0.253883	0.253238	0.255284	0.253402	0.252941	0.249707	0.256185	0.254365	0.252261
28	11590-T	1425871	0.254658	0.2549	0.255465	0.255182	0.280166	0.279164	0.253657	0.249956	0.254742	0.252007	0.250849	0.249418	0.252893	0.251594	0.249061	0.247199	0.249333	0.25107	0.253181	0.25077	0.251795	0.248915	0.250865	0.250194	0.247931	0.247045	0.0307572	0	0.248504	0.248097	0.24919	0.247068	0.250432	0.249083	0.251738	0.247713	0.250861	0.249032	0.252036	0.251136	0.253614	0.251191	0.251444	0.24729	0.254445	0.252018	0.250316
29	11830-B	1422808	0.256653	0.25674	0.257386	0.256999	0.280806	0.279984	0.253548	0.250125	0.257106	0.254717	0.248712	0.247524	0.252863	0.251774	0.25036	0.248804	0.249543	0.25179	0.252509	0.250422	0.254114	0.251736	0.251233	0.250742	0.250099	0.249405	0.250387	0.248504	0	0.0314106	0.251049	0.249359	0.251709	0.250628	0.250555	0.247199	0.251065	0.248545	0.25192	0.251385	0.255019	0.253064	0.252783	0.249118	0.256009	0.254056	0.250775
30	11830-T	1427081	0.256576	0.256155	0.257386	0.25644	0.280562	0.27944	0.253774	0.250082	0.25712	0.254291	0.248587	0.247092	0.25271	0.251411	0.250298	0.248399	0.249372	0.251267	0.252404	0.24983	0.254105	0.251337	0.25114	0.250448	0.249678	0.248819	0.250332	0.248097	0.0314106	0	0.250954	0.248845	0.251775	0.250435	0.250615	0.246604	0.25111	0.24789	0.251777	0.25107	0.255007	0.252586	0.252858	0.248624	0.255978	0.253571	0.250523
31	11874-B	1422962	0.256441	0.25687	0.257164	0.257075	0.279184	0.278302	0.255525	0.252125	0.256196	0.253753	0.252259	0.250957	0.253836	0.252757	0.250343	0.248678	0.250438	0.252327	0.252482	0.250322	0.251831	0.249219	0.252423	0.251853	0.253946	0.25306	0.251008	0.24919	0.251049	0.250954	0	0.0297839	0.251162	0.250214	0.249394	0.245855	0.250507	0.248542	0.251549	0.250924	0.253569	0.251325	0.249642	0.245735	0.256059	0.253865	0.251853
32	11874-T	1428248	0.254744	0.254708	0.255591	0.254967	0.277232	0.275938	0.254067	0.25016	0.254625	0.251543	0.250372	0.248513	0.25198	0.250544	0.24863	0.246445	0.248791	0.250519	0.250747	0.247823	0.250238	0.24691	0.250618	0.249688	0.251766	0.250663	0.249433	0.247068	0.249359	0.248845	0.0297839	0	0.249578	0.248172	0.247765	0.24309	0.248888	0.246174	0.249859	0.248883	0.25192	0.249082	0.248235	0.243362	0.25451	0.25144	0.250139
33	11926-B	1419664	0.258642	0.258856	0.259199	0.259076	0.284003	0.283206	0.256662	0.253533	0.259323	0.257143	0.251919	0.250804	0.255559	0.254518	0.250508	0.249086	0.251934	0.254516	0.252521	0.250589	0.251515	0.24917	0.254436	0.253987	0.2542	0.253512	0.252213	0.250432	0.251709	0.251775	0.251162	0.249578	0	0.0319178	0.252347	0.249216	0.252548	0.250554	0.25358	0.252968	0.254487	0.252473	0.253086	0.249595	0.256553	0.254773	0.252584
34	11926-T	1425054	0.2577	0.257497	0.258344	0.257656	0.282897	0.281937	0.255839	0.252267	0.258503	0.255759	0.25086	0.24945	0.254457	0.2532	0.249523	0.247679	0.251031	0.253278	0.251607	0.249214	0.25069	0.247797	0.253461	0.252673	0.252732	0.251919	0.251273	0.249083	0.250628	0.250435	0.250214	0.248172	0.0319178	0	0.251475	0.247579	0.251644	0.249057	0.252483	0.251613	0.253443	0.25104	0.252349	0.248191	0.255577	0.253272	0.251663
35	12103-B	1417854	0.256238	0.256489	0.256831	0.256687	0.282885	0.282083	0.253809	0.250878	0.257063	0.255025	0.250284	0.249205	0.255636	0.254735	0.251891	0.25046	0.252091	0.25432	0.254782	0.252921	0.251431	0.249265	0.252648	0.25227	0.252275	0.251517	0.253325	0.251738	0.250555	0.250615	0.249394	0.247765	0.252347	0.251475	0	0.0309414	0.249292	0.250531	0.252384	0.251883	0.252129	0.250213	0.251852	0.248616	0.256958	0.255241	0.252433
36	12103-T	1428954	0.253088	0.252524	0.253842	0.252713	0.279343	0.277968	0.25113	0.247186	0.254656	0.251436	0.246163	0.244207	0.252023	0.250484	0.248585	0.246231	0.248808	0.250868	0.251419	0.248253	0.248357	0.24498	0.24936	0.248274	0.247985	0.246851	0.250256	0.247713	0.247199	0.246604	0.245855	0.24309	0.249216	0.247579	0.0309414	0	0.246207	0.246133	0.24923	0.24803	0.24909	0.246141	0.249006	0.243998	0.253817	0.250586	0.249165
37	12333-B	1417576	0.25664	0.256769	0.257219	0.256968	0.281155	0.280446	0.254676	0.251672	0.257457	0.255229	0.251254	0.250147	0.254616	0.253683	0.250356	0.248864	0.252252	0.254318	0.252596	0.250628	0.251968	0.24973	0.251293	0.250847	0.251281	0.250461	0.25253	0.250861	0.251065	0.25111	0.250507	0.248888	0.252548	0.251644	0.249292	0.246207	0	0.249543	0.252531	0.252003	0.25478	0.252957	0.251079	0.247768	0.256746	0.2548	0.253806
38	12333-T	1426477	0.255229	0.255068	0.256039	0.255266	0.279608	0.278478	0.252463	0.248709	0.256726	0.253845	0.249942	0.248271	0.253282	0.251901	0.249765	0.247705	0.249893	0.252026	0.250765	0.248005	0.250963	0.247816	0.252463	0.251522	0.249101	0.248163	0.25141	0.249032	0.248545	0.24789	0.248542	0.246174	0.250554	0.249057	0.250531	0.246133	0.249543	0	0.252667	0.251717	0.25208	0.249509	0.250939	0.246379	0.254642	0.251722	0.250782
39	12543-1081384-B	1418992	0.258796	0.259466	0.260041	0.260193	0.284127	0.283321	0.256666	0.253584	0.258659	0.256375	0.251879	0.2507	0.254806	0.253793	0.253083	0.251459	0.25322	0.255644	0.252465	0.250406	0.254874	0.25245	0.253834	0.253235	0.252728	0.251994	0.253883	0.252036	0.25192	0.251777	0.251549	0.249859	0.25358	0.252483	0.252384	0.24923	0.252531	0.252667	0	0.0306211	0.255241	0.253182	0.253133	0.249587	0.258484	0.256602	0.251682
40	12543-1081384-T	1423388	0.258224	0.258552	0.259395	0.259218	0.28349	0.282478	0.256406	0.252993	0.258283	0.255534	0.251137	0.249731	0.254273	0.253038	0.252493	0.25064	0.25272	0.254907	0.251923	0.2495	0.254329	0.25149	0.25329	0.252486	0.251648	0.250872	0.253238	0.251136	0.251385	0.25107	0.250924	0.248883	0.252968	0.251613	0.251883	0.24803	0.252003	0.251717	0.0306211	0	0.25477	0.252382	0.252754	0.248642	0.25798	0.255573	0.25132
41	12571-B	1420218	0.257838	0.258133	0.258566	0.258451	0.280082	0.279309	0.256871	0.253635	0.258198	0.255978	0.254188	0.25301	0.254452	0.253552	0.255286	0.253802	0.252365	0.254342	0.255114	0.253221	0.254568	0.252242	0.254318	0.253861	0.25428	0.253513	0.255284	0.253614	0.255019	0.255007	0.253569	0.25192	0.254487	0.253443	0.252129	0.24909	0.25478	0.25208	0.255241	0.25477	0	0.0273146	0.255275	0.251685	0.257303	0.255487	0.254469
42	12571-T	1427444	0.255822	0.255691	0.256761	0.256087	0.277976	0.276871	0.255165	0.251324	0.256348	0.253524	0.251864	0.250286	0.252154	0.250825	0.253234	0.251359	0.25028	0.252233	0.25315	0.250591	0.25265	0.249653	0.252294	0.251474	0.251774	0.250845	0.253402	0.251191	0.253064	0.252586	0.251325	0.249082	0.252473	0.25104	0.250213	0.246141	0.252957	0.249509	0.253182	0.252382	0.0273146	0	0.253514	0.249007	0.255366	0.252943	0.252347
43	12596-B	1411846	0.257562	0.258304	0.258262	0.258564	0.281989	0.28136	0.255133	0.252409	0.258492	0.256589	0.251916	0.250954	0.256007	0.25511	0.252535	0.251306	0.251654	0.253882	0.253557	0.251863	0.252552	0.250612	0.253227	0.252866	0.252339	0.251662	0.252941	0.251444	0.252783	0.252858	0.249642	0.248235	0.253086	0.252349	0.251852	0.249006	0.251079	0.250939	0.253133	0.252754	0.255275	0.253514	0	0.0317029	0.257544	0.255986	0.252813
44	12596-T	1426993	0.254077	0.254176	0.254984	0.254507	0.278255	0.277125	0.252135	0.248352	0.255323	0.252338	0.247958	0.246299	0.251988	0.250505	0.248938	0.24693	0.24818	0.250337	0.24997	0.24708	0.249154	0.246033	0.249532	0.248599	0.247963	0.246976	0.249707	0.24729	0.249118	0.248624	0.245735	0.243362	0.249595	0.248191	0.248616	0.243998	0.247768	0.246379	0.249587	0.248642	0.251685	0.249007	0.0317029	0	0.254221	0.251479	0.249252
45	13019-B	1419313	0.256459	0.256937	0.25711	0.257131	0.283775	0.282995	0.258911	0.255771	0.259393	0.257132	0.255949	0.254834	0.252908	0.251939	0.25796	0.256555	0.254515	0.256834	0.254844	0.252938	0.257613	0.255448	0.257333	0.256985	0.255805	0.255075	0.256185	0.254445	0.256009	0.255978	0.256059	0.25451	0.256553	0.255577	0.256958	0.253817	0.256746	0.254642	0.258484	0.25798	0.257303	0.255366	0.257544	0.254221	0	0.0325233	0.258605
46	13019-T	1426767	0.25462	0.254601	0.255287	0.254566	0.281285	0.280054	0.257441	0.25368	0.257498	0.254429	0.253651	0.251886	0.250693	0.249324	0.255934	0.253791	0.252594	0.254583	0.252555	0.249723	0.255758	0.252638	0.25545	0.254561	0.25321	0.252138	0.254365	0.252018	0.254056	0.253571	0.253865	0.25144	0.254773	0.253272	0.255241	0.250586	0.2548	0.251722	0.256602	0.255573	0.255487	0.252943	0.255986	0.251479	0.0325233	0	0.256753
47	13104-1095757-B	1420927	0.256616	0.257158	0.257853	0.257898	0.281964	0.281131	0.254925	0.251538	0.257572	0.255412	0.253141	0.251932	0.255079	0.254092	0.251555	0.249974	0.250242	0.252428	0.255025	0.253014	0.253699	0.251199	0.252382	0.251724	0.251769	0.25099	0.252261	0.250316	0.250775	0.250523	0.251853	0.250139	0.252584	0.251663	0.252433	0.249165	0.253806	0.250782	0.251682	0.25132	0.254469	0.252347	0.252813	0.249252	0.258605	0.256753	0
48	13104-1095757-T	1424124	0.256833	0.25706	0.258048	0.257717	0.282063	0.281013	0.255381	0.251659	0.257976	0.255356	0.253265	0.25172	0.255396	0.254134	0.251715	0.249801	0.250597	0.252608	0.255271	0.252759	0.25391	0.250965	0.252578	0.251502	0.251483	0.250576	0.252639	0.250431	0.251132	0.250614	0.252037	0.249917	0.252949	0.251621	0.252888	0.248859	0.254125	0.250626	0.251964	0.251148	0.254867	0.25247	0.253315	0.249112	0.258924	0.256488	0.0291996
49	13179-1096899-B	1416146	0.258032	0.258149	0.259152	0.258727	0.284041	0.283283	0.257514	0.254636	0.259222	0.257226	0.252687	0.251615	0.257052	0.256184	0.253215	0.251739	0.250679	0.252974	0.256696	0.254748	0.252774	0.250568	0.253134	0.25251	0.252465	0.251798	0.253556	0.252033	0.254364	0.25445	0.254093	0.252531	0.25368	0.252757	0.251868	0.248769	0.253632	0.250656	0.25392	0.253534	0.25541	0.253555	0.252986	0.249667	0.260707	0.258991	0.251346
50	13179-1096899-T	1424805	0.257014	0.256182	0.258304	0.256934	0.282686	0.281657	0.256852	0.253453	0.258476	0.255969	0.251613	0.250166	0.255863	0.25476	0.252277	0.250474	0.249954	0.251774	0.255696	0.253301	0.251829	0.249089	0.252091	0.251197	0.251102	0.250243	0.252574	0.250656	0.253244	0.252816	0.253156	0.251146	0.252724	0.251512	0.251211	0.24736	0.252544	0.249288	0.25296	0.252175	0.254573	0.25228	0.252411	0.248275	0.259926	0.257638	0.250499
51	13518-B	1419334	0.258095	0.258487	0.25868	0.258657	0.280611	0.279812	0.255366	0.252401	0.257552	0.255473	0.250837	0.24967	0.253689	0.252669	0.252835	0.251462	0.248097	0.250609	0.251899	0.25005	0.251957	0.249666	0.252423	0.251956	0.251654	0.251032	0.253023	0.251326	0.25157	0.251479	0.251905	0.250245	0.252381	0.251517	0.250625	0.247519	0.250941	0.251158	0.252636	0.252119	0.253648	0.251634	0.252163	0.248837	0.256278	0.255237	0.251814
52	13518-T	1425702	0.25617	0.256106	0.257008	0.256329	0.278729	0.277575	0.253778	0.250183	0.255882	0.253089	0.24871	0.247019	0.25156	0.250199	0.250879	0.248994	0.246152	0.248507	0.24995	0.24734	0.250107	0.247136	0.250421	0.24959	0.249258	0.248428	0.251289	0.248991	0.249514	0.249001	0.249955	0.247651	0.250508	0.249179	0.248792	0.244662	0.249166	0.248564	0.250736	0.249853	0.25183	0.249223	0.250547	0.246182	0.254476	0.252684	0.249858
53	14261-B	1420788	0.257463	0.257495	0.258257	0.257763	0.280927	0.280061	0.253638	0.250471	0.257119	0.254862	0.250395	0.249252	0.253859	0.252876	0.24938	0.247924	0.251481	0.253756	0.251801	0.249853	0.251837	0.249432	0.252465	0.252081	0.252538	0.251753	0.251067	0.249396	0.249192	0.249164	0.250462	0.24877	0.251414	0.250545	0.248998	0.245768	0.251278	0.25058	0.254785	0.254292	0.253741	0.251789	0.251257	0.247792	0.256661	0.254768	0.253447
54	14261-T	1426712	0.260738	0.259735	0.261524	0.259999	0.283492	0.282561	0.257031	0.253812	0.260501	0.258105	0.253668	0.252435	0.257113	0.256093	0.252575	0.251038	0.254644	0.255861	0.255	0.252933	0.254997	0.2525	0.255639	0.255143	0.255743	0.254893	0.254092	0.252263	0.252703	0.252004	0.253499	0.251707	0.254884	0.253736	0.252295	0.248856	0.254514	0.25378	0.258024	0.257438	0.256896	0.254859	0.254443	0.250881	0.259979	0.2579	0.256429
55	14365-B	1420641	0.254615	0.255234	0.255282	0.255468	0.281714	0.280843	0.254914	0.25164	0.257419	0.255158	0.25126	0.25011	0.25392	0.252879	0.250571	0.248941	0.251203	0.253496	0.251825	0.249821	0.252807	0.250317	0.252852	0.252218	0.252166	0.251376	0.251699	0.249706	0.250136	0.250033	0.249029	0.247258	0.251093	0.250075	0.251173	0.247786	0.253186	0.250701	0.253652	0.253108	0.251491	0.249421	0.251522	0.2478	0.256614	0.25442	0.252638
56	14365-T	1425253	0.253533	0.253738	0.254313	0.253997	0.280568	0.279442	0.254017	0.25029	0.256528	0.253677	0.249963	0.248464	0.252561	0.251163	0.24945	0.247417	0.250079	0.251942	0.250686	0.247962	0.251642	0.248598	0.251782	0.250782	0.250546	0.249578	0.250772	0.248307	0.248913	0.248426	0.247842	0.245568	0.249927	0.248527	0.250189	0.245933	0.252254	0.249041	0.252666	0.251772	0.250346	0.247804	0.250615	0.246011	0.255685	0.252869	0.251475
57	14862-B	1417779	0.256562	0.257062	0.257165	0.257201	0.28229	0.281544	0.254572	0.251603	0.258135	0.256096	0.25064	0.249604	0.255404	0.254537	0.25243	0.251014	0.25113	0.253125	0.252196	0.250373	0.254605	0.252453	0.252952	0.252533	0.253426	0.252717	0.252484	0.250876	0.250952	0.250937	0.250963	0.249447	0.253233	0.252356	0.252106	0.249076	0.252591	0.252048	0.253734	0.253233	0.252932	0.251051	0.251617	0.248276	0.254896	0.25395	0.252616
58	14862-T	1424084	0.256083	0.256235	0.256751	0.256382	0.281328	0.280375	0.254243	0.250824	0.257711	0.255176	0.249744	0.248398	0.254585	0.253504	0.251719	0.250017	0.250267	0.251807	0.251433	0.249184	0.254109	0.251487	0.252525	0.251861	0.252322	0.251515	0.251908	0.249848	0.250128	0.249719	0.250153	0.248266	0.252707	0.251407	0.251639	0.24792	0.251836	0.250871	0.252724	0.25203	0.252213	0.249893	0.251266	0.24725	0.254427	0.252971	0.251924
59	14919-B	1417465	0.257325	0.257983	0.257979	0.258164	0.283331	0.282513	0.254736	0.251751	0.257439	0.255371	0.250659	0.249382	0.254209	0.25337	0.252333	0.250952	0.25183	0.254212	0.254316	0.252493	0.254483	0.252345	0.252333	0.252022	0.253144	0.252434	0.250691	0.249038	0.251273	0.251068	0.250218	0.248757	0.251932	0.250995	0.250529	0.248131	0.253161	0.251341	0.253137	0.252752	0.254194	0.252426	0.252315	0.249025	0.257303	0.255606	0.25361
60	14919-T	1426405	0.25512	0.255204	0.255964	0.255457	0.280997	0.279847	0.252845	0.249097	0.255562	0.252717	0.248165	0.246397	0.25179	0.250525	0.250123	0.248132	0.249557	0.25182	0.25207	0.249445	0.252277	0.249212	0.250171	0.249338	0.250315	0.249389	0.248555	0.24625	0.248897	0.248286	0.247774	0.245581	0.249789	0.248328	0.248445	0.244834	0.251024	0.248316	0.250896	0.250119	0.252036	0.249502	0.250376	0.245928	0.25511	0.25257	0.251214
61	15126-B	1420455	0.257104	0.257441	0.25781	0.25771	0.281452	0.280646	0.254256	0.251073	0.258685	0.256504	0.250427	0.249298	0.254435	0.253516	0.250648	0.249239	0.251271	0.253792	0.253003	0.251044	0.253009	0.250653	0.251529	0.251078	0.250409	0.249757	0.251315	0.249629	0.250259	0.250299	0.250429	0.248776	0.252965	0.251892	0.253001	0.249799	0.252243	0.248969	0.250909	0.250317	0.253868	0.251847	0.252619	0.249179	0.256276	0.254357	0.252459
62	15126-T	1424489	0.255489	0.255623	0.256295	0.255936	0.27981	0.278811	0.252869	0.249282	0.257269	0.254547	0.248785	0.247339	0.252697	0.251511	0.249036	0.247239	0.249645	0.252111	0.251457	0.248961	0.25148	0.248695	0.250026	0.249351	0.24845	0.247698	0.249887	0.24787	0.248627	0.248451	0.248767	0.246745	0.251416	0.250099	0.251441	0.247591	0.25087	0.246894	0.249294	0.248418	0.252375	0.250033	0.251284	0.247093	0.254717	0.252357	0.250858
63	15178-B	1417398	0.258171	0.258854	0.258839	0.259081	0.283025	0.282324	0.25448	0.251454	0.258096	0.255907	0.252017	0.250902	0.255146	0.254233	0.252018	0.250641	0.251853	0.25409	0.252566	0.250644	0.252201	0.250061	0.2525	0.252048	0.251963	0.251237	0.252089	0.250413	0.252566	0.252478	0.250969	0.249423	0.253294	0.252459	0.252069	0.248986	0.25135	0.250865	0.252243	0.251796	0.253318	0.251522	0.252275	0.249098	0.256505	0.254714	0.250727
64	15178-T	1424774	0.25669	0.256985	0.257493	0.257205	0.281376	0.280391	0.25326	0.249604	0.256763	0.253954	0.250246	0.248761	0.25341	0.252239	0.250395	0.248574	0.250447	0.252427	0.25105	0.248526	0.250939	0.248099	0.250961	0.250209	0.249979	0.24905	0.250769	0.248577	0.25096	0.250536	0.249361	0.247274	0.251854	0.250621	0.250555	0.246606	0.249877	0.248835	0.25083	0.250101	0.25183	0.249544	0.251082	0.247084	0.255124	0.252664	0.249178
65	15917-1147612-B	1415281	0.258167	0.258325	0.259282	0.258987	0.28221	0.281429	0.256544	0.253561	0.258519	0.256433	0.25333	0.252198	0.25636	0.255485	0.251213	0.249816	0.250722	0.25303	0.255464	0.253595	0.254785	0.252586	0.253067	0.252561	0.253598	0.252824	0.253071	0.251378	0.251514	0.2517	0.252864	0.25132	0.254497	0.253778	0.25367	0.250708	0.253339	0.252056	0.253317	0.253036	0.25521	0.253303	0.252028	0.248728	0.25745	0.255723	0.253159
66	15917-1147612-T	1424728	0.256823	0.256504	0.257988	0.257224	0.280816	0.279842	0.255722	0.252219	0.257403	0.254776	0.251958	0.250495	0.254839	0.253662	0.24974	0.247999	0.249359	0.251359	0.254115	0.251785	0.253507	0.250743	0.251964	0.25117	0.251792	0.250944	0.251794	0.24964	0.250216	0.25001	0.251356	0.249331	0.253078	0.251916	0.252549	0.24877	0.252154	0.250057	0.252015	0.251028	0.253984	0.251691	0.250988	0.246906	0.256015	0.253718	0.25216
67	16000-B	1421952	0.268253	0.268471	0.268964	0.268574	0.271545	0.270708	0.270054	0.266833	0.26827	0.266007	0.266802	0.265625	0.265971	0.264963	0.265636	0.2639	0.265752	0.267881	0.267051	0.264977	0.267787	0.265305	0.267485	0.266928	0.2663	0.265499	0.267844	0.266077	0.265304	0.26514	0.265227	0.263479	0.268038	0.267275	0.268844	0.265475	0.26704	0.26591	0.267957	0.267289	0.26655	0.264437	0.267545	0.263924	0.270304	0.268048	0.267261
68	16000-T	1427112	0.266707	0.266464	0.267575	0.266685	0.26989	0.268775	0.268699	0.264922	0.266824	0.264026	0.265023	0.263408	0.264174	0.262842	0.264082	0.261946	0.264073	0.266094	0.265458	0.262732	0.266272	0.263162	0.265852	0.264941	0.264366	0.263355	0.266345	0.264062	0.263701	0.263185	0.263553	0.261237	0.266537	0.265388	0.267422	0.263128	0.265574	0.263812	0.266419	0.265454	0.264993	0.26235	0.266216	0.261795	0.268765	0.265771	0.265661
69	16004-B	1418904	0.257963	0.258317	0.258593	0.258547	0.282408	0.281606	0.255904	0.252903	0.258058	0.25591	0.252261	0.251095	0.254987	0.254035	0.250839	0.249418	0.250913	0.25295	0.253248	0.251419	0.251795	0.249548	0.254345	0.253805	0.252733	0.252071	0.252966	0.251302	0.252323	0.252246	0.252361	0.250781	0.252225	0.251377	0.252206	0.249116	0.251122	0.251725	0.253279	0.252744	0.253821	0.251857	0.253596	0.250248	0.256503	0.254785	0.252695
70	16004-T	1425851	0.257388	0.25681	0.258075	0.257044	0.281504	0.28041	0.255742	0.252226	0.257557	0.254733	0.251551	0.249983	0.254193	0.252911	0.250326	0.248389	0.25051	0.25206	0.252647	0.250211	0.251174	0.248327	0.253778	0.252937	0.251691	0.250911	0.252454	0.250319	0.251686	0.251011	0.251556	0.249494	0.251711	0.25038	0.251832	0.247806	0.250845	0.250586	0.252614	0.251687	0.253385	0.250881	0.253296	0.249106	0.255994	0.253661	0.252228
71	16176-B	1422175	0.255393	0.255622	0.256106	0.25568	0.280595	0.279751	0.253975	0.250578	0.256213	0.253856	0.250731	0.249456	0.253982	0.252952	0.252859	0.25115	0.249594	0.251557	0.252643	0.25046	0.250816	0.248284	0.250142	0.249425	0.251523	0.250614	0.250968	0.2491	0.250535	0.250439	0.250425	0.248577	0.250833	0.249843	0.249441	0.245886	0.250735	0.249567	0.252117	0.251445	0.252941	0.250781	0.251385	0.247563	0.254224	0.250994	0.252209
72	16176-T	1426400	0.254524	0.25432	0.255341	0.254398	0.279527	0.278365	0.253149	0.249426	0.255459	0.252569	0.249661	0.247953	0.252907	0.251529	0.251944	0.249878	0.248676	0.250365	0.251716	0.248991	0.249933	0.246845	0.249083	0.24813	0.250167	0.249105	0.249964	0.247658	0.249387	0.248925	0.249419	0.247051	0.25003	0.248731	0.248559	0.244192	0.249782	0.248081	0.251072	0.250161	0.251994	0.249389	0.250574	0.24607	0.253283	0.249499	0.25123
73	16263-B	1417900	0.256398	0.256997	0.257181	0.257276	0.282402	0.281742	0.25745	0.254361	0.256289	0.254115	0.254662	0.253635	0.252576	0.251615	0.253316	0.251855	0.25401	0.256113	0.254118	0.25219	0.255305	0.253038	0.255287	0.254815	0.253796	0.253067	0.254758	0.25305	0.252961	0.25287	0.254363	0.252766	0.256713	0.255906	0.253639	0.250628	0.255765	0.253953	0.256096	0.25566	0.254479	0.252579	0.255361	0.25201	0.255923	0.254089	0.253541
74	16263-T	1426700	0.253824	0.253874	0.254696	0.254044	0.279383	0.278274	0.25531	0.251457	0.253831	0.250766	0.251716	0.250018	0.24972	0.248314	0.250651	0.248462	0.251506	0.253305	0.251327	0.248448	0.252767	0.249556	0.252723	0.251723	0.250427	0.249314	0.252319	0.249935	0.250267	0.249638	0.251392	0.24897	0.254205	0.252792	0.251244	0.246687	0.253252	0.250475	0.253483	0.252595	0.251969	0.24937	0.253137	0.248499	0.253295	0.250287	0.250974
75	16311-B	1418864	0.285353	0.285565	0.285794	0.285596	0.232382	0.231628	0.286583	0.283594	0.284597	0.282474	0.281575	0.28061	0.283978	0.283131	0.284016	0.282632	0.283821	0.28575	0.285044	0.283315	0.285636	0.283304	0.284821	0.284438	0.282955	0.282318	0.283555	0.282121	0.282418	0.282446	0.283161	0.281599	0.284758	0.283931	0.286082	0.283261	0.283101	0.283134	0.284693	0.28418	0.28295	0.281282	0.285034	0.281963	0.285335	0.283418	0.286009
76	16311-T	1425435	0.283308	0.28305	0.283846	0.283074	0.23023	0.229091	0.284828	0.281212	0.282789	0.279873	0.279174	0.27779	0.281653	0.280434	0.281817	0.279927	0.281778	0.28345	0.282892	0.280397	0.283649	0.280558	0.282699	0.281912	0.28042	0.279509	0.281711	0.279754	0.280365	0.280037	0.280936	0.278773	0.282743	0.281458	0.28424	0.280279	0.281206	0.280425	0.282581	0.281729	0.280927	0.27868	0.283324	0.279241	0.283361	0.280548	0.283938
77	16599-1159140-B	1414234	0.259027	0.259432	0.260018	0.260021	0.284127	0.283389	0.256329	0.253469	0.258933	0.257031	0.253721	0.252745	0.258229	0.257371	0.252916	0.251658	0.25449	0.25656	0.255057	0.253394	0.254156	0.252008	0.25342	0.252993	0.254343	0.253728	0.252653	0.251192	0.252018	0.252142	0.251334	0.249837	0.252404	0.251525	0.250925	0.248117	0.253754	0.252746	0.255637	0.255283	0.254981	0.253285	0.252436	0.249409	0.259208	0.257768	0.254556
78	16599-1159140-T	1425746	0.258346	0.25783	0.259619	0.258738	0.28315	0.281933	0.256011	0.252353	0.258658	0.25595	0.2527	0.251237	0.257343	0.256035	0.252253	0.250286	0.253901	0.255753	0.25431	0.251754	0.253642	0.250648	0.252415	0.251432	0.253024	0.252111	0.252227	0.250101	0.250993	0.250698	0.250533	0.248347	0.251803	0.250266	0.250463	0.246452	0.253057	0.251397	0.254566	0.253794	0.254337	0.251972	0.252324	0.248192	0.258751	0.256387	0.253605
79	16599-B	1420436	0.257292	0.257575	0.257953	0.25778	0.281978	0.281091	0.254937	0.251727	0.256948	0.254767	0.25153	0.250382	0.256097	0.255118	0.250831	0.249427	0.252402	0.254436	0.252933	0.251043	0.252157	0.249768	0.251701	0.251239	0.252076	0.251395	0.250668	0.249015	0.249967	0.249938	0.249219	0.247515	0.250356	0.249325	0.24898	0.245746	0.251659	0.250378	0.254002	0.25348	0.252944	0.251109	0.250577	0.247148	0.257174	0.255358	0.252878
80	16599-T	1424211	0.257876	0.257727	0.258507	0.257769	0.281061	0.279956	0.255483	0.252035	0.257559	0.254974	0.251745	0.250406	0.256371	0.255207	0.25119	0.249385	0.252822	0.254582	0.25301	0.250689	0.25266	0.249846	0.252186	0.251499	0.252054	0.251162	0.25121	0.249187	0.250034	0.249861	0.248515	0.246503	0.250887	0.249417	0.249438	0.245535	0.251951	0.250458	0.254241	0.253457	0.253335	0.251182	0.251286	0.247446	0.257598	0.255024	0.253307
81	16677-B	1423124	0.25562	0.255951	0.256375	0.25616	0.282094	0.281202	0.256518	0.253108	0.257213	0.254768	0.250182	0.248896	0.254534	0.25336	0.253385	0.251764	0.252007	0.254029	0.25476	0.252591	0.253854	0.251311	0.253352	0.252718	0.250422	0.249554	0.253031	0.251141	0.250754	0.25049	0.250468	0.248626	0.253609	0.252469	0.252828	0.249319	0.253186	0.250696	0.254629	0.254007	0.255122	0.252963	0.251909	0.248048	0.256091	0.253981	0.251673
82	16677-T	1428830	0.254117	0.25398	0.255017	0.254312	0.280445	0.279166	0.255177	0.251203	0.255811	0.252797	0.248306	0.246468	0.252691	0.251144	0.251823	0.249681	0.250459	0.25237	0.253092	0.25012	0.252381	0.249144	0.251724	0.250678	0.248388	0.247274	0.251668	0.249211	0.249125	0.248433	0.248778	0.24623	0.252065	0.250554	0.251389	0.246728	0.251708	0.248411	0.252981	0.252051	0.253563	0.250793	0.25064	0.245786	0.254573	0.251748	0.249988
83	16995-B	1418190	0.258398	0.258974	0.259102	0.259131	0.282273	0.281537	0.255134	0.252052	0.258478	0.256492	0.249742	0.248632	0.253966	0.252908	0.2497	0.248322	0.25055	0.252857	0.252886	0.25109	0.252208	0.249906	0.25366	0.25317	0.250694	0.249988	0.250629	0.248892	0.250419	0.250444	0.250557	0.24891	0.251798	0.250829	0.251866	0.248835	0.252045	0.25075	0.25245	0.251997	0.254401	0.25257	0.251345	0.24801	0.25651	0.254622	0.251133
84	16995-T	1426638	0.257019	0.256875	0.257811	0.257045	0.280568	0.279576	0.254011	0.250338	0.257208	0.254475	0.248019	0.246429	0.252085	0.250734	0.248216	0.246321	0.249071	0.250962	0.251553	0.249043	0.250834	0.247793	0.252144	0.251299	0.248851	0.247943	0.249349	0.24696	0.248862	0.248335	0.248899	0.24662	0.250388	0.248881	0.250593	0.246502	0.250733	0.248663	0.2511	0.250271	0.252924	0.250516	0.250218	0.245972	0.25518	0.25258	0.24971
85	17135-B	1419307	0.25783	0.258097	0.258579	0.25826	0.281562	0.280763	0.255371	0.252334	0.258239	0.256118	0.251896	0.250737	0.25487	0.253821	0.251107	0.249617	0.249441	0.251723	0.254873	0.252895	0.252872	0.250569	0.253199	0.2527	0.25088	0.250192	0.252669	0.251028	0.249532	0.249581	0.252774	0.251112	0.251581	0.25076	0.25215	0.248966	0.253915	0.251004	0.251394	0.250859	0.254684	0.252669	0.25461	0.251251	0.257479	0.255712	0.253304
86	17135-T	1427399	0.255229	0.254874	0.256128	0.254961	0.278536	0.277248	0.253259	0.249392	0.255938	0.252851	0.248899	0.247025	0.251949	0.250384	0.247969	0.245667	0.246739	0.248805	0.251965	0.248916	0.250351	0.246996	0.250576	0.249458	0.24757	0.246461	0.25024	0.247846	0.246847	0.246349	0.249908	0.247353	0.249542	0.248102	0.249712	0.244857	0.251379	0.247485	0.248814	0.247712	0.252209	0.249414	0.252326	0.247629	0.254987	0.251967	0.250673
87	17212-B	1418002	0.257057	0.257674	0.25768	0.257826	0.281814	0.2811	0.258676	0.255664	0.256051	0.253852	0.254875	0.253723	0.255104	0.254169	0.253341	0.251809	0.252718	0.254966	0.256064	0.254055	0.254845	0.252484	0.255571	0.255067	0.254438	0.253635	0.252951	0.251428	0.252552	0.252497	0.252995	0.251329	0.255993	0.255069	0.254281	0.251073	0.253502	0.25241	0.256031	0.255535	0.25484	0.252868	0.254834	0.251368	0.255731	0.253678	0.256233
88	17212-T	1423507	0.255952	0.256182	0.25673	0.256333	0.280937	0.279988	0.257856	0.254395	0.255245	0.252536	0.253897	0.252438	0.253909	0.252753	0.252379	0.250487	0.251644	0.253729	0.254904	0.25243	0.25389	0.251056	0.254588	0.253828	0.253112	0.252171	0.251968	0.250075	0.251549	0.251179	0.251797	0.249763	0.254903	0.25363	0.253347	0.249513	0.252596	0.250946	0.254952	0.254201	0.253852	0.251494	0.253913	0.249838	0.254775	0.252283	0.25507
89	17392-B	1421677	0.256069	0.256415	0.256831	0.256483	0.280382	0.27956	0.255291	0.251899	0.257389	0.255128	0.252238	0.251054	0.255541	0.254665	0.253598	0.252088	0.252206	0.254754	0.25044	0.248467	0.253484	0.251031	0.251327	0.250831	0.251501	0.25065	0.254156	0.25236	0.250363	0.250373	0.252035	0.250319	0.253635	0.252496	0.251833	0.248491	0.250774	0.251125	0.253474	0.252873	0.254017	0.252077	0.252035	0.248444	0.254393	0.252156	0.254065
90	17392-T	1425918	0.254367	0.254496	0.255244	0.254633	0.278797	0.277662	0.253716	0.249947	0.255833	0.253071	0.250333	0.248769	0.253701	0.252545	0.251957	0.249995	0.250483	0.253049	0.248835	0.246271	0.251964	0.24902	0.249664	0.248825	0.249576	0.248539	0.252639	0.250397	0.248661	0.248394	0.250365	0.2481	0.25212	0.250675	0.250327	0.246185	0.249201	0.249038	0.251924	0.251061	0.252607	0.250158	0.250515	0.246152	0.252833	0.249998	0.252352
91	17827-B	1419484	0.258454	0.25888	0.259294	0.259153	0.282227	0.281396	0.255515	0.252397	0.259547	0.257425	0.250616	0.249543	0.255689	0.254731	0.25147	0.250008	0.2511	0.253276	0.253192	0.251244	0.252635	0.250308	0.252387	0.25194	0.252295	0.251525	0.25091	0.249172	0.253025	0.253041	0.250505	0.248989	0.251138	0.250319	0.252564	0.24942	0.251216	0.249448	0.251995	0.251553	0.253074	0.251157	0.249372	0.245998	0.256908	0.255074	0.251922
92	17827-T	1426223	0.256854	0.256772	0.257739	0.257041	0.280238	0.279125	0.254013	0.250272	0.257998	0.255256	0.248558	0.247037	0.253671	0.252358	0.249582	0.24759	0.249333	0.251391	0.251362	0.248789	0.250877	0.247821	0.250623	0.249771	0.249986	0.24898	0.249236	0.246923	0.251156	0.250793	0.2486	0.246494	0.249456	0.248177	0.250995	0.246798	0.249562	0.246991	0.250244	0.249468	0.25133	0.248841	0.247907	0.243524	0.255294	0.252699	0.250104
93	18210-B	1420552	0.253462	0.254281	0.254269	0.254598	0.280899	0.280081	0.258326	0.255243	0.254189	0.251943	0.256094	0.254965	0.253144	0.252193	0.256748	0.255221	0.25386	0.256206	0.253127	0.251162	0.256518	0.254206	0.256062	0.255619	0.255453	0.254567	0.254948	0.253335	0.256406	0.256267	0.254366	0.252622	0.255636	0.254653	0.253138	0.249924	0.255848	0.254358	0.256991	0.256519	0.254993	0.25298	0.255031	0.251653	0.255986	0.25401	0.255431
94	18210-T	1428090	0.251442	0.251709	0.252413	0.252088	0.278722	0.277483	0.256616	0.252818	0.25239	0.24933	0.253612	0.251917	0.25077	0.249372	0.254519	0.252443	0.251711	0.254003	0.251052	0.24828	0.254677	0.251487	0.253977	0.253072	0.252707	0.251615	0.253012	0.250747	0.254357	0.253735	0.252162	0.249747	0.253722	0.252209	0.25127	0.246791	0.253945	0.251535	0.254924	0.254055	0.252992	0.250296	0.253298	0.248792	0.254042	0.251201	0.253365
95	5060-1034766-B	1421893	0.255574	0.255979	0.256746	0.256709	0.281952	0.281142	0.256154	0.252817	0.257373	0.255047	0.252022	0.250823	0.254962	0.25389	0.252931	0.251367	0.252452	0.254409	0.253862	0.251653	0.252358	0.249873	0.251881	0.251305	0.250185	0.249351	0.253223	0.251403	0.250224	0.249785	0.252223	0.250409	0.25555	0.25453	0.250884	0.247503	0.252427	0.250698	0.252631	0.252093	0.254421	0.252273	0.253988	0.250342	0.256383	0.254529	0.251713
96	5060-1034766-T	1423638	0.25512	0.255385	0.256255	0.256081	0.28151	0.2806	0.255826	0.252349	0.257125	0.254498	0.251538	0.250207	0.25458	0.253351	0.252521	0.250718	0.251941	0.253944	0.253459	0.251045	0.252002	0.24927	0.251435	0.250687	0.24945	0.24864	0.252855	0.250859	0.249714	0.249216	0.251757	0.249777	0.255146	0.253828	0.250548	0.246752	0.252077	0.249986	0.252204	0.251318	0.2541	0.251763	0.253658	0.249646	0.256019	0.253869	0.251415
97	5287-1079625-B	1417759	0.257802	0.258147	0.258921	0.258783	0.28294	0.282191	0.254982	0.251998	0.258999	0.256824	0.251759	0.250592	0.255887	0.254973	0.250687	0.249264	0.251638	0.253867	0.254468	0.252533	0.254532	0.252331	0.251126	0.250632	0.252615	0.251845	0.253564	0.251852	0.252069	0.252034	0.253282	0.25167	0.253417	0.252507	0.251438	0.248346	0.251944	0.251466	0.252623	0.252327	0.25521	0.253298	0.252244	0.248857	0.257712	0.256087	0.252177
98	5287-1079625-T	1425293	0.256233	0.256123	0.257652	0.256931	0.281353	0.280335	0.253915	0.250335	0.257697	0.254948	0.250142	0.248603	0.254281	0.25308	0.249133	0.247259	0.250305	0.252409	0.252954	0.250448	0.25313	0.250286	0.249527	0.248733	0.250692	0.249733	0.252267	0.250093	0.250655	0.250285	0.251726	0.249643	0.252075	0.25077	0.250168	0.246164	0.250619	0.249514	0.251168	0.25037	0.253859	0.25142	0.251091	0.246772	0.256486	0.254164	0.250828
99	5545-1079775-B	1411916	0.258167	0.259017	0.259287	0.259685	0.284147	0.283389	0.25559	0.25288	0.260548	0.258581	0.25247	0.251437	0.255775	0.254948	0.252605	0.25134	0.250947	0.253482	0.254921	0.253164	0.252928	0.250851	0.255083	0.254607	0.255066	0.254422	0.252624	0.251038	0.252913	0.252796	0.252845	0.251428	0.252269	0.251508	0.251793	0.24898	0.2549	0.250815	0.254133	0.253784	0.253327	0.251469	0.252971	0.249761	0.259484	0.257936	0.2538
100	5545-1079775-T	1424364	0.257799	0.257826	0.259047	0.25857	0.283103	0.282144	0.255876	0.252342	0.260263	0.25783	0.251627	0.250376	0.255011	0.254017	0.252315	0.25065	0.250346	0.252322	0.254552	0.25236	0.252784	0.250201	0.254549	0.253823	0.254226	0.253384	0.252216	0.250218	0.2524	0.251428	0.252393	0.250576	0.252184	0.250859	0.251297	0.247878	0.25436	0.249822	0.254003	0.253258	0.252762	0.250481	0.252785	0.248969	0.258995	0.257045	0.253245
101	5656-1034950-B	1420179	0.255942	0.256345	0.257144	0.257042	0.283359	0.282594	0.259571	0.256499	0.257101	0.254812	0.256897	0.255652	0.252795	0.251818	0.257924	0.256371	0.255239	0.257566	0.255185	0.253106	0.260653	0.258227	0.256887	0.256385	0.256958	0.256036	0.256348	0.254439	0.256462	0.256352	0.257448	0.255697	0.259018	0.258024	0.258864	0.255631	0.257241	0.255345	0.258393	0.257843	0.256861	0.25482	0.257269	0.253724	0.254942	0.252931	0.258953
102	5656-1034950-T	1425154	0.255538	0.255435	0.256768	0.256246	0.282628	0.281552	0.259113	0.255567	0.25678	0.253975	0.256182	0.254559	0.251876	0.25058	0.257255	0.255292	0.25458	0.256346	0.254527	0.251942	0.260248	0.257244	0.256364	0.255389	0.255869	0.254799	0.255713	0.253278	0.255822	0.255227	0.256624	0.254419	0.258451	0.25699	0.25842	0.254429	0.256601	0.254353	0.257667	0.25691	0.256294	0.253829	0.256896	0.252646	0.254218	0.251646	0.258052
103	5684-1079906-B	1424756	0.255768	0.256036	0.257136	0.256775	0.281369	0.280364	0.25495	0.251231	0.256939	0.254241	0.25089	0.24945	0.252782	0.251542	0.250179	0.248316	0.250631	0.252799	0.251886	0.249462	0.25277	0.249944	0.251876	0.251054	0.250498	0.249603	0.25221	0.250123	0.251492	0.251082	0.251971	0.24998	0.251829	0.25035	0.250476	0.246651	0.250251	0.249719	0.252396	0.251601	0.252848	0.250533	0.251047	0.246772	0.255645	0.253369	0.251081
104	5684-1079906-T	1423354	0.259118	0.259012	0.260391	0.259672	0.283977	0.28302	0.257939	0.254462	0.26014	0.25761	0.254399	0.253088	0.256255	0.25514	0.253424	0.251671	0.253821	0.255116	0.255168	0.252958	0.255867	0.253202	0.255069	0.254123	0.254021	0.253128	0.25498	0.253023	0.254946	0.254663	0.255081	0.253282	0.2552	0.253646	0.253797	0.250161	0.253376	0.253183	0.255572	0.254778	0.255925	0.253816	0.253656	0.249736	0.259022	0.256804	0.254354
105	5902-1035059-B	1414832	0.257724	0.258224	0.258678	0.258883	0.283526	0.282831	0.255978	0.253188	0.25884	0.25687	0.253543	0.252464	0.256515	0.255643	0.25268	0.251304	0.251422	0.253626	0.253476	0.25174	0.251474	0.249385	0.254612	0.254169	0.25284	0.252189	0.254922	0.253293	0.25311	0.253182	0.253174	0.251723	0.25319	0.252337	0.252217	0.249387	0.25249	0.251681	0.253012	0.252672	0.256262	0.254453	0.251561	0.248345	0.257685	0.256148	0.25222
106	5902-1035059-T	1423937	0.256106	0.256239	0.25737	0.256921	0.281792	0.28073	0.254955	0.251444	0.257444	0.254844	0.25167	0.250241	0.254722	0.253574	0.251065	0.24917	0.249919	0.252056	0.251884	0.249479	0.249971	0.247133	0.252944	0.252132	0.250885	0.249928	0.253659	0.251535	0.251526	0.251286	0.251589	0.249606	0.251774	0.250488	0.250784	0.247028	0.251124	0.249628	0.251497	0.250621	0.254774	0.252466	0.25038	0.246274	0.25616	0.253924	0.250668
107	5958-1040497-B	1417977	0.257479	0.257895	0.25864	0.258612	0.279759	0.27903	0.25515	0.252162	0.256362	0.254233	0.253068	0.251881	0.255225	0.254317	0.250859	0.249442	0.252219	0.254658	0.252997	0.251022	0.254417	0.252031	0.251434	0.250911	0.25082	0.250033	0.25217	0.250468	0.250457	0.250608	0.252383	0.25081	0.252708	0.251746	0.250321	0.247315	0.252999	0.250298	0.252974	0.252696	0.255224	0.253339	0.254297	0.250881	0.257797	0.256064	0.252435
108	5958-1040497-T	1425029	0.255762	0.255813	0.25702	0.256585	0.277994	0.277006	0.253953	0.250329	0.254862	0.252177	0.251175	0.249702	0.253404	0.252193	0.249098	0.247315	0.25056	0.253014	0.251268	0.248806	0.252748	0.249886	0.249722	0.248931	0.248693	0.247778	0.250579	0.248441	0.248718	0.248566	0.250635	0.248594	0.251055	0.249701	0.248738	0.244925	0.251491	0.248154	0.251338	0.250641	0.253589	0.251234	0.252862	0.248635	0.25615	0.253892	0.250861
109	6068-B	1424172	0.259476	0.259749	0.260358	0.260112	0.273167	0.272147	0.257087	0.253459	0.259021	0.256493	0.250707	0.249366	0.255622	0.254399	0.253138	0.251454	0.255074	0.257176	0.254837	0.252534	0.254867	0.252206	0.254124	0.253498	0.252464	0.251561	0.254971	0.25303	0.250378	0.25015	0.253549	0.251667	0.255255	0.25399	0.254369	0.250787	0.255324	0.251003	0.253982	0.253309	0.256651	0.25437	0.254055	0.250023	0.257459	0.255375	0.255823
110	6068-T	1426598	0.259188	0.259298	0.26013	0.259646	0.273069	0.271936	0.256976	0.253234	0.258799	0.255986	0.250297	0.248799	0.255292	0.253965	0.252803	0.250885	0.25488	0.256895	0.254487	0.251968	0.254556	0.251634	0.253891	0.253087	0.251862	0.250921	0.254706	0.252476	0.249988	0.249621	0.253216	0.251173	0.254874	0.253379	0.254174	0.250193	0.255227	0.25042	0.253589	0.252748	0.256549	0.254042	0.253895	0.249574	0.257158	0.254834	0.255551
111	6359-1050886-B	1413791	0.256632	0.257173	0.257698	0.257834	0.28313	0.282452	0.256908	0.254045	0.257491	0.255361	0.257655	0.256599	0.254277	0.253333	0.256052	0.254596	0.25424	0.256811	0.256579	0.25463	0.256966	0.254803	0.255745	0.255244	0.25488	0.254063	0.255598	0.253786	0.254114	0.254141	0.253177	0.251548	0.255994	0.25504	0.25529	0.252265	0.255662	0.25471	0.255277	0.254901	0.256122	0.254165	0.256376	0.253006	0.257444	0.255628	0.253917
112	6359-1050886-T	1424822	0.254239	0.25425	0.255369	0.254966	0.280507	0.279573	0.255105	0.251395	0.255217	0.252494	0.254934	0.253518	0.251445	0.250262	0.253635	0.251796	0.251654	0.254147	0.25389	0.251538	0.254512	0.25175	0.253283	0.25254	0.251844	0.250923	0.25314	0.250914	0.25133	0.251047	0.25061	0.248561	0.253413	0.252101	0.252895	0.249074	0.253127	0.251728	0.252974	0.252172	0.253546	0.251104	0.254092	0.249916	0.254922	0.252665	0.251504
113	BRA04-B	1424008	0.276563	0.276636	0.277253	0.276691	0.279983	0.279037	0.276964	0.273393	0.277484	0.274985	0.272096	0.270704	0.274142	0.273025	0.273746	0.272056	0.272478	0.274572	0.274238	0.272009	0.275586	0.272892	0.273138	0.2724	0.271781	0.270857	0.273218	0.271383	0.272271	0.272067	0.272689	0.270787	0.274595	0.273405	0.273905	0.270302	0.272515	0.27115	0.274845	0.274189	0.273792	0.271554	0.274842	0.27099	0.276297	0.273506	0.274119
114	BRA04-T	1427653	0.274128	0.273906	0.274789	0.273789	0.277472	0.276236	0.274649	0.270734	0.275	0.271977	0.269345	0.267566	0.271565	0.270159	0.271164	0.269054	0.269817	0.271804	0.271492	0.268647	0.273068	0.269878	0.270577	0.269589	0.268759	0.26764	0.270735	0.268501	0.26969	0.269124	0.269938	0.267519	0.272035	0.270554	0.271409	0.266854	0.269942	0.268004	0.272299	0.271343	0.27135	0.26869	0.272428	0.267867	0.273754	0.27019	0.271685
115	BRA05-B	1421783	0.292433	0.292892	0.292867	0.292821	0.295527	0.294662	0.293631	0.290316	0.29002	0.287614	0.291495	0.290172	0.288312	0.287293	0.292321	0.290642	0.290267	0.292407	0.289628	0.287631	0.292462	0.289888	0.293147	0.292516	0.29168	0.290861	0.292957	0.291039	0.290937	0.290804	0.291024	0.289154	0.291645	0.290674	0.293262	0.289719	0.290139	0.289236	0.292525	0.291776	0.291914	0.290001	0.293258	0.289773	0.290894	0.288002	0.293599
116	BRA05-T	1425858	0.291226	0.291562	0.291878	0.291507	0.294257	0.293185	0.292639	0.289022	0.288874	0.286162	0.290069	0.288592	0.286899	0.285769	0.29107	0.289048	0.289149	0.29123	0.288312	0.285881	0.291301	0.288391	0.291828	0.29102	0.290345	0.289282	0.291941	0.289758	0.289741	0.289388	0.289607	0.287424	0.290569	0.289339	0.292186	0.288051	0.288988	0.287629	0.29129	0.290395	0.290788	0.288556	0.292288	0.288255	0.289784	0.286412	0.292355
117	BRA07-B	1423604	0.261602	0.261753	0.262367	0.261895	0.277967	0.277093	0.262201	0.258757	0.262143	0.25972	0.25846	0.257236	0.259123	0.258084	0.257209	0.255431	0.258376	0.260854	0.25767	0.255515	0.260392	0.257808	0.260213	0.259547	0.256959	0.25612	0.257881	0.255911	0.258371	0.258308	0.258607	0.256649	0.257782	0.256722	0.258142	0.254472	0.259572	0.25544	0.261473	0.260718	0.259964	0.257718	0.259021	0.255134	0.261795	0.259329	0.259882
118	BRA07-T	1428362	0.260802	0.260481	0.261625	0.260598	0.277015	0.275811	0.261634	0.257774	0.261453	0.258462	0.257614	0.255921	0.258033	0.256668	0.256432	0.25426	0.257685	0.259869	0.256881	0.254058	0.259729	0.25654	0.259516	0.258551	0.255628	0.254579	0.257227	0.254776	0.257597	0.257147	0.257814	0.255293	0.25697	0.255499	0.257524	0.252931	0.259002	0.254108	0.260561	0.259428	0.259264	0.256556	0.258469	0.253813	0.26113	0.258005	0.259055
119	BRA08-B	1415883	0.257922	0.258657	0.258634	0.258842	0.282051	0.28133	0.255433	0.252377	0.256862	0.254734	0.253739	0.252618	0.254808	0.253885	0.251928	0.250537	0.251203	0.253554	0.254535	0.252759	0.253611	0.25146	0.253783	0.253375	0.252675	0.251965	0.251627	0.249985	0.252248	0.25223	0.251889	0.250303	0.25446	0.253535	0.252602	0.24948	0.252158	0.251831	0.253494	0.252987	0.252668	0.25085	0.25163	0.248316	0.257078	0.255237	0.25305
120	BRA08-T	1427756	0.250807	0.251242	0.25132	0.250954	0.272478	0.271378	0.248781	0.245234	0.249928	0.24718	0.245955	0.244378	0.24773	0.246479	0.244698	0.242676	0.244175	0.246073	0.246718	0.244237	0.246701	0.243804	0.246777	0.245848	0.245134	0.24388	0.244816	0.242736	0.245086	0.244635	0.24434	0.242077	0.247523	0.246224	0.245542	0.24119	0.244712	0.243711	0.246739	0.245773	0.24603	0.243773	0.244995	0.240991	0.249857	0.246344	0.246376
121	BRA10-B	1422251	0.258746	0.25893	0.259513	0.259074	0.280526	0.279711	0.258697	0.255324	0.258955	0.256511	0.254077	0.252785	0.254852	0.253864	0.254579	0.252998	0.256426	0.258587	0.256026	0.253878	0.2556	0.253062	0.256085	0.255479	0.254632	0.253823	0.255176	0.253259	0.254652	0.254505	0.254017	0.252203	0.255566	0.25448	0.255926	0.252452	0.253606	0.252452	0.255891	0.255163	0.256705	0.254485	0.25542	0.251733	0.257838	0.255548	0.255602
122	BRA10-T	1427589	0.255917	0.255724	0.25667	0.255681	0.277471	0.27625	0.256106	0.252386	0.256319	0.25328	0.250949	0.249198	0.252046	0.250745	0.251599	0.249478	0.253492	0.255115	0.252887	0.250082	0.252903	0.249664	0.253333	0.252358	0.2512	0.250088	0.25241	0.25004	0.251714	0.25113	0.250961	0.248511	0.252842	0.251294	0.253052	0.248456	0.250855	0.248956	0.253106	0.252041	0.253959	0.251371	0.252728	0.248324	0.25499	0.251692	0.252801
123	BRA13-B	1421942	0.304921	0.305295	0.305358	0.305089	0.310663	0.30984	0.308668	0.305464	0.303925	0.301589	0.305194	0.303922	0.302163	0.301195	0.305677	0.303972	0.305683	0.307643	0.301176	0.299194	0.305708	0.303282	0.307298	0.306681	0.304727	0.303904	0.306474	0.304781	0.304884	0.304753	0.304233	0.302429	0.305643	0.30458	0.306534	0.303012	0.306053	0.303057	0.305547	0.304904	0.305602	0.30375	0.30677	0.303343	0.30369	0.300382	0.306963
124	BRA13-T	1429564	0.303663	0.303449	0.304276	0.303354	0.309187	0.307948	0.307688	0.303838	0.302639	0.299565	0.303597	0.301736	0.300553	0.299122	0.304227	0.30193	0.304264	0.305716	0.29981	0.296962	0.304484	0.301313	0.305959	0.304886	0.302894	0.301771	0.305353	0.303049	0.303438	0.302897	0.302668	0.300151	0.304344	0.302711	0.305368	0.300611	0.304837	0.301095	0.304225	0.303222	0.3043	0.301763	0.305605	0.30113	0.302429	0.298278	0.305411
125	BRA15-B	1414610	0.288539	0.288927	0.288914	0.288798	0.285007	0.284209	0.289898	0.286863	0.286888	0.284699	0.285253	0.284082	0.285767	0.284844	0.286683	0.28523	0.285804	0.287907	0.284741	0.282934	0.287799	0.285546	0.2883	0.287749	0.286926	0.286225	0.286267	0.284684	0.287583	0.287604	0.285363	0.283743	0.288447	0.287619	0.286943	0.283679	0.28606	0.284565	0.287239	0.28655	0.287219	0.285362	0.288693	0.28536	0.286855	0.284211	0.288663
126	BRA15-T	1428112	0.281254	0.281154	0.281674	0.280794	0.278477	0.277225	0.282871	0.279273	0.279843	0.276902	0.277477	0.275747	0.278287	0.276919	0.279045	0.276877	0.278484	0.280088	0.276846	0.274144	0.28039	0.277218	0.280958	0.279852	0.279081	0.277872	0.278936	0.276708	0.279982	0.279528	0.277439	0.274992	0.281308	0.27988	0.279596	0.274884	0.278591	0.276351	0.279803	0.278582	0.280187	0.277707	0.281386	0.276981	0.279531	0.275433	0.281321
127	KAL0004-B	1423650	0.320139	0.320107	0.320566	0.319864	0.320199	0.319342	0.324457	0.321012	0.318108	0.315698	0.320542	0.319239	0.316847	0.315967	0.322771	0.320943	0.321605	0.323197	0.318156	0.316051	0.323277	0.320728	0.322966	0.322243	0.321614	0.320548	0.321979	0.320136	0.321109	0.320845	0.320904	0.319037	0.322429	0.321372	0.323176	0.319585	0.322173	0.3189	0.323174	0.322584	0.322021	0.320184	0.323838	0.320312	0.319663	0.316059	0.323441
128	KAL0004-T	1428155	0.320015	0.319554	0.320407	0.319276	0.319902	0.318863	0.324451	0.320799	0.318058	0.315227	0.32022	0.318669	0.316498	0.315418	0.322607	0.320609	0.321391	0.32239	0.317932	0.315553	0.323115	0.320225	0.322784	0.32187	0.321088	0.319951	0.321762	0.319608	0.320854	0.32019	0.320564	0.318364	0.322239	0.320896	0.323005	0.318795	0.321821	0.318279	0.323005	0.322156	0.321773	0.319653	0.323758	0.319858	0.31948	0.315513	0.323342
129	KAL0013-B	1419957	0.32218	0.322343	0.322398	0.322008	0.322826	0.322156	0.32576	0.322876	0.319705	0.317603	0.322783	0.321673	0.317926	0.31708	0.323633	0.322082	0.323356	0.325149	0.319396	0.317615	0.325302	0.323086	0.32398	0.323458	0.322121	0.321241	0.322578	0.321013	0.321893	0.321827	0.322349	0.320799	0.32457	0.323731	0.324364	0.321229	0.323295	0.321569	0.323445	0.322833	0.323538	0.321909	0.32537	0.322269	0.321012	0.317689	0.324778
130	KAL0013-T	1429856	0.320867	0.320286	0.32133	0.320135	0.321384	0.320266	0.324806	0.321199	0.318693	0.315761	0.321259	0.319592	0.316521	0.315239	0.322386	0.320284	0.322143	0.323459	0.318142	0.315515	0.324134	0.321169	0.322574	0.32161	0.320528	0.319396	0.321349	0.319153	0.320448	0.319839	0.320896	0.318565	0.323425	0.32199	0.323281	0.318887	0.322242	0.319656	0.322175	0.32117	0.322083	0.319737	0.324457	0.320234	0.319777	0.315603	0.323449
131	KAL0022-B	1422126	0.322382	0.3227	0.32283	0.322492	0.323905	0.323162	0.327005	0.323898	0.321257	0.319052	0.323653	0.322476	0.319041	0.318118	0.324917	0.323261	0.323855	0.325262	0.320324	0.318371	0.325446	0.323119	0.325258	0.324659	0.323107	0.3222	0.322875	0.321214	0.322405	0.322169	0.32309	0.321384	0.324453	0.323491	0.325025	0.321594	0.323431	0.322314	0.324589	0.324019	0.324112	0.322284	0.324859	0.321499	0.320121	0.316698	0.325976
132	KAL0022-T	1428924	0.320794	0.320636	0.321399	0.320501	0.322036	0.320941	0.325675	0.322004	0.319886	0.317003	0.321849	0.320198	0.317153	0.315901	0.323285	0.321187	0.322225	0.323473	0.318676	0.316038	0.323885	0.320914	0.323604	0.322605	0.321029	0.319926	0.321432	0.31921	0.320681	0.320044	0.321326	0.319021	0.32295	0.321559	0.323536	0.319045	0.321902	0.320028	0.322963	0.322083	0.322578	0.32016	0.323495	0.319229	0.318583	0.314448	0.324318
133	KAL0043-B	1417508	0.321457	0.321903	0.321766	0.321543	0.322807	0.322144	0.325666	0.322774	0.319986	0.318079	0.322743	0.321633	0.318222	0.317507	0.323529	0.322035	0.322331	0.324047	0.318986	0.317251	0.325002	0.322946	0.324495	0.323974	0.322476	0.32163	0.323507	0.32208	0.322532	0.322456	0.321281	0.319754	0.324285	0.323445	0.32525	0.322151	0.322447	0.320914	0.324734	0.324219	0.323688	0.322144	0.324344	0.321261	0.320938	0.317657	0.324927
134	KAL0043-T	1427750	0.321227	0.320634	0.321773	0.320378	0.322081	0.320948	0.325699	0.322118	0.320001	0.317307	0.32229	0.320651	0.317724	0.316626	0.323036	0.321039	0.32204	0.323141	0.318696	0.316247	0.324833	0.321971	0.324086	0.323172	0.321826	0.320718	0.323499	0.321449	0.322161	0.321127	0.320706	0.318525	0.324032	0.322799	0.325112	0.320885	0.322273	0.319687	0.32438	0.323514	0.323521	0.32132	0.324309	0.320275	0.32068	0.31659	0.324403
135	KAL0054-B	1417524	0.322	0.32241	0.322331	0.322075	0.323609	0.322861	0.325429	0.322577	0.320211	0.318213	0.321567	0.320462	0.318345	0.317502	0.324123	0.322652	0.32352	0.325431	0.320377	0.31862	0.325288	0.323129	0.324718	0.324252	0.322517	0.321668	0.323617	0.322033	0.322326	0.322189	0.322398	0.320868	0.32483	0.323991	0.324687	0.32157	0.323662	0.320874	0.324919	0.324346	0.323637	0.322042	0.324503	0.321393	0.320846	0.317606	0.324623
136	KAL0054-T	1429038	0.319494	0.319212	0.320074	0.318991	0.32088	0.31961	0.323424	0.319691	0.318072	0.315113	0.318815	0.317042	0.315445	0.3141	0.321719	0.319526	0.321138	0.32281	0.317789	0.315036	0.323065	0.319906	0.322183	0.321121	0.319441	0.31829	0.321387	0.319	0.319805	0.319124	0.319751	0.317271	0.322498	0.321067	0.322442	0.317848	0.3214	0.317533	0.32244	0.32145	0.32129	0.318831	0.322482	0.318056	0.318474	0.314241	0.322087
137	KAL070-B	1421200	0.32131	0.321424	0.321713	0.321161	0.322373	0.321606	0.325058	0.322007	0.319736	0.317524	0.321323	0.320222	0.317329	0.316493	0.323704	0.32206	0.322549	0.324028	0.318719	0.316851	0.323911	0.321566	0.323558	0.322927	0.322141	0.32122	0.321976	0.320344	0.320717	0.320634	0.320707	0.319054	0.323252	0.322263	0.323324	0.31992	0.322475	0.319229	0.323075	0.322477	0.322442	0.320721	0.32315	0.319889	0.319276	0.315719	0.32371
138	KAL0068-T	1428762	0.319124	0.318817	0.319589	0.318639	0.31975	0.31852	0.323201	0.31944	0.317718	0.314743	0.319454	0.317715	0.314918	0.313595	0.321334	0.31921	0.320218	0.321626	0.315879	0.313161	0.321535	0.318461	0.321364	0.320303	0.320228	0.319071	0.320865	0.318652	0.319426	0.318733	0.318963	0.31652	0.321626	0.320271	0.321691	0.317128	0.321444	0.317751	0.319841	0.318909	0.321148	0.318696	0.321366	0.316976	0.318207	0.313871	0.321148
139	KAL0072-B	1420678	0.321353	0.321501	0.321833	0.321241	0.323932	0.32321	0.325957	0.32289	0.319822	0.317644	0.322804	0.3217	0.317641	0.31686	0.323761	0.322166	0.321987	0.32374	0.319197	0.317298	0.324046	0.321786	0.323426	0.322865	0.322543	0.321718	0.323003	0.321292	0.321918	0.321717	0.321439	0.319742	0.324115	0.323107	0.324773	0.321417	0.322985	0.320984	0.324237	0.323698	0.322891	0.321149	0.323988	0.32077	0.320427	0.316979	0.324165
140	KAL0072-T	1427461	0.319827	0.31945	0.320338	0.31922	0.322184	0.32114	0.324715	0.321038	0.318442	0.315628	0.321038	0.31944	0.315841	0.314646	0.322162	0.32005	0.320338	0.321987	0.317672	0.315093	0.322568	0.319595	0.321943	0.321002	0.320353	0.319357	0.321495	0.319208	0.320247	0.31966	0.319744	0.317427	0.322565	0.321135	0.323218	0.318791	0.321583	0.318764	0.322643	0.321709	0.321363	0.319	0.322703	0.318474	0.318852	0.314667	0.322513
141	KAL0074-B	1421407	0.321519	0.321756	0.321862	0.321416	0.322641	0.321772	0.326471	0.323422	0.3201	0.317873	0.322531	0.321416	0.31975	0.318898	0.323154	0.321594	0.323186	0.324782	0.319594	0.317747	0.324504	0.322206	0.324135	0.323564	0.321752	0.32093	0.323234	0.32157	0.322173	0.322056	0.321989	0.32034	0.324192	0.323314	0.324913	0.321611	0.322979	0.320691	0.323898	0.323372	0.324057	0.322258	0.324592	0.321214	0.32033	0.31694	0.32438
142	KAL0074-T	1426859	0.320131	0.319924	0.320553	0.319573	0.320998	0.319866	0.325336	0.321779	0.318799	0.315944	0.320986	0.319426	0.318108	0.316968	0.321724	0.319769	0.321666	0.323164	0.31812	0.315677	0.323167	0.320274	0.322687	0.321749	0.319864	0.318856	0.321942	0.319773	0.320647	0.320158	0.320423	0.31829	0.322805	0.321523	0.323509	0.319307	0.32161	0.318712	0.322485	0.321572	0.322637	0.32034	0.323413	0.319208	0.318835	0.314861	0.322881
143	KAL0078-B	1421211	0.321734	0.321902	0.322076	0.321638	0.323722	0.32292	0.325337	0.322268	0.320069	0.317838	0.32211	0.320978	0.317575	0.316656	0.32336	0.321653	0.323611	0.324915	0.318236	0.31629	0.324104	0.321787	0.323941	0.323411	0.321614	0.320674	0.321682	0.320019	0.321268	0.321188	0.321157	0.319462	0.324394	0.323429	0.323792	0.320451	0.322629	0.319776	0.323015	0.322426	0.322837	0.321112	0.323249	0.319935	0.320078	0.316655	0.323987
144	KAL0078-T	1428134	0.320037	0.31968	0.320507	0.319461	0.321827	0.320667	0.323928	0.320229	0.318476	0.315574	0.320083	0.318407	0.315505	0.314194	0.321633	0.31936	0.321842	0.322966	0.316383	0.313718	0.322449	0.319362	0.322151	0.321211	0.319253	0.318181	0.319977	0.317806	0.319456	0.318895	0.319258	0.316884	0.322637	0.321232	0.322132	0.317653	0.320949	0.317385	0.321294	0.320373	0.321086	0.318729	0.321791	0.317485	0.31839	0.314202	0.322157
145	KAL0091-B	1420442	0.32129	0.321461	0.321599	0.321079	0.321819	0.321043	0.324611	0.321567	0.320109	0.318033	0.32092	0.319833	0.317089	0.316192	0.322813	0.32127	0.321645	0.323219	0.318539	0.316702	0.323835	0.321555	0.322881	0.322299	0.321616	0.320734	0.321523	0.319931	0.320932	0.320873	0.320236	0.318669	0.323207	0.322338	0.32317	0.319891	0.321666	0.319624	0.322643	0.322144	0.321265	0.3196	0.322361	0.319197	0.319306	0.315951	0.323181
146	KAL0091-T	1428627	0.319747	0.319287	0.320162	0.319016	0.319897	0.31881	0.323366	0.319638	0.318755	0.315995	0.319055	0.317435	0.315234	0.31401	0.321262	0.319167	0.319997	0.321255	0.316968	0.314353	0.322423	0.319366	0.321266	0.320282	0.319526	0.318445	0.320084	0.317896	0.31927	0.3186	0.318579	0.31632	0.321739	0.320429	0.32177	0.317358	0.320292	0.317406	0.320984	0.320092	0.31975	0.317469	0.32113	0.316916	0.317775	0.313636	0.321472
147	KAL0095-B	1424233	0.321774	0.32195	0.322288	0.321759	0.322933	0.322047	0.326226	0.322949	0.319381	0.316955	0.320859	0.319577	0.31718	0.316221	0.32311	0.321323	0.322943	0.324581	0.317547	0.315405	0.324159	0.321626	0.323318	0.322619	0.320876	0.319877	0.321706	0.319815	0.321236	0.320825	0.320899	0.319076	0.324088	0.32301	0.3235	0.31982	0.322494	0.319412	0.323451	0.322765	0.323079	0.321137	0.323628	0.320106	0.319968	0.316225	0.323958
148	KAL0095-T	1429372	0.319333	0.318937	0.319872	0.318756	0.320047	0.318866	0.324611	0.320797	0.31894	0.315999	0.319549	0.317836	0.315822	0.314451	0.321347	0.319155	0.321616	0.32307	0.317375	0.314648	0.323998	0.320872	0.322529	0.321475	0.320565	0.319466	0.321269	0.318979	0.320169	0.319412	0.319741	0.317275	0.322597	0.321199	0.323015	0.318367	0.321949	0.318136	0.321399	0.320307	0.322141	0.319727	0.323126	0.318672	0.318698	0.314346	0.322665
149	KAL0101-B	1419556	0.321728	0.322064	0.322062	0.321718	0.322416	0.321613	0.326217	0.323255	0.320481	0.318355	0.323058	0.321939	0.317632	0.316778	0.323173	0.321613	0.323217	0.324716	0.31986	0.318055	0.324644	0.322381	0.324175	0.32358	0.322089	0.321143	0.322581	0.321012	0.321432	0.321305	0.321646	0.319989	0.323739	0.322789	0.323314	0.320016	0.322825	0.320189	0.323745	0.323122	0.323632	0.321981	0.323987	0.320729	0.320284	0.316798	0.324645
150	KAL0101-T	1427631	0.320325	0.32016	0.320852	0.319952	0.320706	0.319508	0.325049	0.321398	0.319234	0.316455	0.321375	0.319779	0.315805	0.314631	0.321745	0.319672	0.321806	0.323132	0.318378	0.315816	0.323278	0.320311	0.322681	0.321715	0.320251	0.319141	0.321264	0.319097	0.319812	0.319296	0.319976	0.317711	0.322308	0.320913	0.321964	0.317592	0.321452	0.317974	0.322225	0.321308	0.322156	0.319825	0.32283	0.318622	0.318938	0.314719	0.323052
151	KAL0104-B	1423174	0.256895	0.257129	0.257615	0.257218	0.280598	0.279654	0.254989	0.251504	0.257677	0.255237	0.249279	0.247959	0.254939	0.253918	0.250776	0.249166	0.250278	0.252309	0.254446	0.252203	0.253256	0.250602	0.252473	0.251735	0.249968	0.249104	0.252914	0.250918	0.2504	0.250391	0.251129	0.249267	0.253622	0.252444	0.25037	0.246709	0.251717	0.249675	0.253211	0.252491	0.253099	0.250974	0.253785	0.250058	0.257221	0.254849	0.251158
152	KAL0104-T	1429655	0.255966	0.255685	0.256811	0.255876	0.279529	0.27824	0.254285	0.250349	0.256979	0.254034	0.248256	0.246408	0.253856	0.252481	0.249842	0.247755	0.249437	0.251207	0.253501	0.250542	0.252524	0.2493	0.251455	0.250418	0.248616	0.247538	0.252189	0.249594	0.249501	0.249033	0.250207	0.247659	0.252858	0.251261	0.249537	0.24481	0.25081	0.248154	0.252228	0.251226	0.252286	0.249615	0.253294	0.248784	0.256409	0.253329	0.250211
153	KAL0106-B	1421259	0.32253	0.322528	0.322868	0.322276	0.322591	0.321819	0.325765	0.322706	0.319469	0.317224	0.32232	0.321156	0.317173	0.316404	0.323298	0.321742	0.323227	0.324878	0.319578	0.317632	0.325047	0.322669	0.323344	0.32276	0.321792	0.320954	0.323189	0.321586	0.321607	0.321501	0.321467	0.319801	0.324632	0.323638	0.323033	0.319705	0.321611	0.32022	0.323794	0.323204	0.324928	0.323217	0.324652	0.321445	0.320059	0.316637	0.32529
154	KAL0106-T	1426641	0.321248	0.320802	0.321666	0.320568	0.321153	0.320089	0.324703	0.321154	0.318294	0.315542	0.320712	0.319195	0.315665	0.314562	0.321929	0.319924	0.321846	0.32335	0.31807	0.315641	0.323754	0.320807	0.321987	0.321063	0.320023	0.318927	0.32191	0.319835	0.320194	0.319795	0.319919	0.317733	0.323331	0.321969	0.321756	0.317617	0.320354	0.31825	0.322522	0.321697	0.323578	0.321421	0.323572	0.319574	0.318789	0.314715	0.323926
155	KAL0107-B	1421592	0.276787	0.27703	0.277418	0.277082	0.293005	0.292128	0.280694	0.277484	0.275949	0.273505	0.27568	0.274506	0.275507	0.274492	0.277781	0.27602	0.276821	0.279017	0.274545	0.27241	0.27957	0.277102	0.278704	0.278092	0.27606	0.275089	0.279079	0.277247	0.277308	0.27707	0.276096	0.274282	0.278579	0.277619	0.278585	0.275025	0.277998	0.275308	0.278221	0.277577	0.277935	0.275932	0.278873	0.275206	0.277149	0.274284	0.279367
156	KAL0107-T	1427941	0.275096	0.27491	0.275836	0.274995	0.291114	0.289877	0.279277	0.275492	0.274372	0.271309	0.27369	0.272059	0.273547	0.272149	0.275996	0.273733	0.275046	0.277103	0.27278	0.269892	0.277942	0.27478	0.276927	0.275936	0.27388	0.272687	0.277469	0.275092	0.275418	0.27484	0.274211	0.27177	0.276897	0.275549	0.277014	0.272344	0.27633	0.272904	0.276452	0.275541	0.276295	0.273627	0.277497	0.272891	0.275428	0.271767	0.277652
157	KAL053-B	1420759	0.322238	0.322575	0.322719	0.322381	0.322964	0.322173	0.326109	0.32304	0.319702	0.317614	0.322037	0.320884	0.318595	0.317678	0.323529	0.321947	0.323544	0.325316	0.319805	0.317928	0.325327	0.32306	0.324824	0.324384	0.322192	0.321344	0.321927	0.320344	0.321621	0.321492	0.32165	0.319965	0.323796	0.322805	0.325559	0.322317	0.323249	0.319785	0.323557	0.323059	0.323155	0.321411	0.324629	0.32134	0.320731	0.317497	0.324687
158	KAL053-T	1427627	0.320542	0.320378	0.321145	0.320224	0.321116	0.320012	0.324693	0.321003	0.318267	0.315528	0.320018	0.318448	0.316557	0.315286	0.321768	0.319742	0.321873	0.323433	0.318009	0.315503	0.323741	0.320823	0.323123	0.322298	0.320005	0.319014	0.320322	0.318161	0.319771	0.319268	0.319808	0.317522	0.322191	0.320761	0.324094	0.319841	0.321639	0.31742	0.321841	0.320991	0.321374	0.319037	0.323212	0.318971	0.319055	0.31519	0.322879
159	KAL0068-B	1421454	0.321264	0.321386	0.32167	0.321096	0.323374	0.322587	0.325172	0.322102	0.32071	0.318553	0.322358	0.321247	0.318651	0.317753	0.323711	0.322138	0.32349	0.325345	0.318767	0.316851	0.324634	0.322255	0.323966	0.32342	0.321467	0.320629	0.323539	0.321903	0.322198	0.321925	0.32169	0.320047	0.324627	0.323676	0.324632	0.321318	0.322679	0.320564	0.323377	0.3228	0.323961	0.322174	0.325381	0.322095	0.320909	0.31752	0.324002
160	KAL070-T	1426518	0.322467	0.322191	0.322911	0.32191	0.322941	0.322008	0.326187	0.322832	0.320597	0.317996	0.321999	0.320671	0.318216	0.317177	0.324511	0.322626	0.323362	0.324421	0.319673	0.317472	0.32496	0.322345	0.324394	0.32363	0.322679	0.321691	0.322847	0.320907	0.321488	0.321141	0.321661	0.319699	0.324087	0.322759	0.324234	0.320329	0.323406	0.319838	0.323823	0.323058	0.323346	0.32135	0.324173	0.320438	0.320014	0.316204	0.32457
161	N0001-B	1417922	0.321583	0.322009	0.321905	0.321715	0.324288	0.323621	0.326447	0.323628	0.321436	0.319427	0.322416	0.321339	0.319373	0.318511	0.323547	0.322133	0.324185	0.32585	0.320058	0.318345	0.324886	0.32277	0.32463	0.324172	0.321398	0.320725	0.322597	0.321108	0.322728	0.322733	0.320898	0.319394	0.324446	0.323665	0.325188	0.322104	0.323682	0.320566	0.324245	0.323706	0.323741	0.322161	0.323993	0.320829	0.320894	0.317592	0.324159
162	N0001-T	1425937	0.320233	0.320092	0.320741	0.319791	0.322765	0.321702	0.325476	0.322051	0.320278	0.317484	0.320867	0.319304	0.317662	0.316476	0.322117	0.320164	0.322941	0.324212	0.318687	0.316271	0.323633	0.32079	0.323312	0.322456	0.319723	0.318775	0.32138	0.319218	0.321427	0.321005	0.319399	0.317268	0.323145	0.321812	0.324073	0.319908	0.322431	0.318628	0.322951	0.32203	0.322415	0.320207	0.322973	0.318862	0.319623	0.315559	0.322732
163	N0002-B	1420806	0.322396	0.322676	0.322787	0.322376	0.324021	0.323269	0.326531	0.323529	0.321733	0.319541	0.323546	0.322415	0.319484	0.318638	0.325117	0.323546	0.323545	0.325246	0.319477	0.317631	0.325362	0.323188	0.32506	0.324505	0.322942	0.322113	0.324266	0.32267	0.321767	0.321629	0.322905	0.321277	0.325417	0.324589	0.325051	0.321779	0.32383	0.320809	0.32423	0.323705	0.324648	0.322848	0.324921	0.321732	0.32199	0.318613	0.325351
164	N0002-T	1425094	0.322913	0.322773	0.323329	0.322476	0.324224	0.323359	0.327179	0.323824	0.322248	0.319805	0.323971	0.322725	0.319723	0.318729	0.325586	0.323745	0.323972	0.325307	0.319921	0.317865	0.325865	0.323379	0.325294	0.32461	0.323273	0.322322	0.324686	0.322855	0.322215	0.321881	0.323241	0.321393	0.32598	0.32485	0.32555	0.321862	0.324246	0.321095	0.324705	0.324003	0.32522	0.323252	0.325603	0.322103	0.322478	0.318846	0.32577
165	N0007-B	1417825	0.322413	0.322767	0.322738	0.322507	0.323112	0.32243	0.326006	0.323159	0.321094	0.319133	0.32276	0.32172	0.319	0.318196	0.323938	0.322522	0.324376	0.325966	0.319926	0.3182	0.324696	0.322602	0.324559	0.324163	0.32273	0.321917	0.323907	0.322473	0.321318	0.32114	0.321603	0.320152	0.324652	0.323789	0.324478	0.321431	0.323079	0.320484	0.324986	0.32453	0.323785	0.32218	0.32369	0.320642	0.321743	0.318567	0.325101
166	N0007-T	1426465	0.320385	0.320244	0.320889	0.320035	0.320876	0.319879	0.324372	0.320841	0.319272	0.316644	0.320523	0.319001	0.316738	0.315599	0.321868	0.319904	0.322439	0.32392	0.317951	0.315531	0.322754	0.319929	0.32256	0.321717	0.320183	0.319088	0.321997	0.320015	0.319232	0.318692	0.319447	0.317375	0.322658	0.321379	0.32266	0.318504	0.321223	0.31773	0.322955	0.32205	0.32183	0.319635	0.322037	0.317934	0.319823	0.315841	0.323087
167	N0010-B	1419917	0.321217	0.321364	0.321576	0.321107	0.322919	0.322184	0.325805	0.322869	0.320593	0.318545	0.32268	0.321623	0.317678	0.316797	0.32337	0.321965	0.323043	0.324636	0.319715	0.317882	0.325164	0.322923	0.323712	0.323228	0.321984	0.321174	0.322533	0.32103	0.322791	0.32274	0.321771	0.320186	0.324809	0.323928	0.324734	0.321539	0.322607	0.320957	0.323695	0.323112	0.323852	0.322256	0.324332	0.321219	0.320706	0.317524	0.325299
168	N0010-T	1425764	0.320342	0.31993	0.320828	0.319616	0.321777	0.320755	0.325068	0.321678	0.319744	0.317158	0.321542	0.320137	0.316466	0.315321	0.322499	0.320667	0.322023	0.323294	0.318665	0.316323	0.324245	0.321489	0.322729	0.32186	0.320651	0.319658	0.321667	0.319714	0.321727	0.321412	0.320629	0.318581	0.323914	0.322588	0.323981	0.319991	0.321899	0.319236	0.322737	0.32182	0.322937	0.32095	0.3235	0.319658	0.319762	0.315957	0.324348
169	N0015-B	1421569	0.322051	0.322256	0.322454	0.321958	0.323534	0.322791	0.326918	0.323888	0.321284	0.319033	0.322879	0.321742	0.317544	0.316617	0.325443	0.323879	0.32358	0.325389	0.320064	0.318172	0.32577	0.323532	0.324995	0.324412	0.323055	0.322143	0.324326	0.322668	0.322247	0.32199	0.323656	0.321922	0.324651	0.323611	0.32546	0.322127	0.323531	0.320326	0.32527	0.324617	0.324154	0.322335	0.325021	0.321701	0.321262	0.317867	0.326728
170	N0015-T	1427090	0.322866	0.322369	0.323346	0.322173	0.32406	0.323093	0.327838	0.324404	0.322107	0.319381	0.32361	0.322091	0.318194	0.317023	0.32603	0.32413	0.324304	0.325446	0.320758	0.31843	0.326424	0.323713	0.32591	0.325095	0.323512	0.322443	0.324971	0.322892	0.322901	0.32197	0.324211	0.322024	0.325622	0.324194	0.326235	0.322225	0.324259	0.320465	0.325958	0.325066	0.32494	0.322744	0.325944	0.322066	0.321851	0.317979	0.327502
171	N0031-B	1421234	0.321755	0.322134	0.32224	0.321939	0.3232	0.322506	0.326626	0.323664	0.319914	0.31775	0.322248	0.321215	0.318201	0.317355	0.324779	0.323205	0.323244	0.324928	0.319751	0.31791	0.3248	0.322526	0.323221	0.32271	0.322368	0.321652	0.323794	0.322203	0.321736	0.32149	0.322079	0.320414	0.324459	0.323599	0.325018	0.321776	0.323818	0.320846	0.323545	0.323033	0.323293	0.32156	0.3244	0.321182	0.319959	0.316733	0.324851
172	N0031-T	1425348	0.319317	0.319423	0.319696	0.319036	0.321162	0.320146	0.325106	0.321652	0.319675	0.317005	0.321039	0.319581	0.316092	0.315009	0.321465	0.319541	0.322526	0.323997	0.318875	0.316486	0.323037	0.320278	0.32329	0.322468	0.320802	0.319848	0.321336	0.319396	0.320727	0.320323	0.320838	0.318761	0.323082	0.321832	0.323439	0.319402	0.322341	0.31867	0.321938	0.32101	0.322165	0.320093	0.323375	0.319447	0.319097	0.31501	0.323558
173	N0048-B	1422769	0.323027	0.323214	0.323433	0.322922	0.323135	0.322416	0.326872	0.323758	0.320954	0.318644	0.32409	0.322934	0.319154	0.31827	0.323791	0.322212	0.323904	0.325614	0.320192	0.318243	0.325236	0.322904	0.325426	0.324788	0.32306	0.322313	0.323389	0.321772	0.322324	0.32232	0.323756	0.322007	0.324272	0.323267	0.326451	0.322968	0.323949	0.322553	0.324933	0.324252	0.32346	0.321689	0.324561	0.32118	0.320936	0.317463	0.326137
174	N0048-T	1427677	0.321648	0.321399	0.322228	0.321197	0.321593	0.320538	0.325728	0.322162	0.319662	0.31684	0.322536	0.320994	0.317521	0.316302	0.322397	0.320399	0.322548	0.324076	0.318786	0.316262	0.323941	0.321009	0.323927	0.322973	0.321394	0.320378	0.322124	0.320066	0.320808	0.32043	0.322317	0.320043	0.322935	0.321576	0.325215	0.32085	0.322583	0.320625	0.32356	0.322588	0.322061	0.319814	0.323477	0.319306	0.319621	0.315511	0.324711
175	N0053-B	1411492	0.322143	0.322596	0.322387	0.32232	0.324012	0.323339	0.325696	0.323034	0.321112	0.319345	0.324208	0.323235	0.318993	0.318357	0.324928	0.323624	0.322595	0.324521	0.319864	0.318343	0.325464	0.323544	0.324896	0.324561	0.323512	0.322851	0.323058	0.321732	0.32239	0.322411	0.322926	0.321578	0.324932	0.3242	0.324918	0.322034	0.323904	0.321496	0.324486	0.324023	0.323265	0.321903	0.324793	0.322011	0.320467	0.317414	0.325087
176	N0053-T	1425106	0.320571	0.320423	0.320833	0.320102	0.32207	0.321155	0.324315	0.321072	0.319601	0.317093	0.322287	0.320897	0.316907	0.315987	0.323185	0.321505	0.320882	0.322554	0.318093	0.315995	0.323812	0.321294	0.32334	0.322635	0.3213	0.320445	0.321562	0.319674	0.320612	0.32023	0.321082	0.319211	0.323293	0.322117	0.323395	0.319607	0.32233	0.319268	0.322808	0.321951	0.321656	0.319743	0.323471	0.319824	0.318806	0.315075	0.323464
177	N0055-B	1420872	0.32246	0.322749	0.322655	0.322446	0.323248	0.322489	0.326201	0.323109	0.320601	0.318422	0.322181	0.321016	0.319203	0.318349	0.324533	0.323032	0.323042	0.325028	0.319363	0.317544	0.325415	0.323221	0.325071	0.324478	0.321361	0.320687	0.323668	0.322117	0.321996	0.321813	0.322112	0.320466	0.325359	0.324394	0.324773	0.321437	0.323659	0.321228	0.324624	0.323916	0.323415	0.321811	0.324922	0.321662	0.320757	0.317374	0.3251
178	N0055-T	1423395	0.321345	0.321269	0.321665	0.320892	0.322106	0.321246	0.325641	0.322435	0.319717	0.317269	0.321755	0.320461	0.317381	0.316353	0.322112	0.320339	0.322814	0.324336	0.318526	0.316437	0.323772	0.321247	0.323175	0.322372	0.321099	0.320191	0.322651	0.320886	0.320467	0.320095	0.32053	0.3186	0.323266	0.322213	0.323587	0.319894	0.322142	0.319469	0.323135	0.322409	0.323473	0.32168	0.323412	0.319856	0.319178	0.315418	0.324464
179	N0056-B	1417276	0.322215	0.322741	0.32236	0.322348	0.323127	0.322448	0.32695	0.324024	0.321063	0.319081	0.323434	0.322447	0.319029	0.318267	0.325639	0.32422	0.323605	0.325079	0.320723	0.319065	0.324561	0.322518	0.32443	0.323985	0.323521	0.322732	0.324091	0.322673	0.322544	0.32252	0.322007	0.320494	0.324312	0.323579	0.325618	0.322494	0.324542	0.321341	0.323854	0.323309	0.322484	0.320906	0.324283	0.321258	0.321376	0.318079	0.325042
180	N0056-T	1425911	0.320477	0.320484	0.320876	0.320252	0.32127	0.320303	0.325474	0.321893	0.31962	0.316876	0.321527	0.32008	0.317042	0.315955	0.323989	0.322034	0.321956	0.32331	0.318971	0.316571	0.323039	0.32021	0.322697	0.321824	0.321331	0.32039	0.322518	0.320523	0.320733	0.320327	0.320262	0.3181	0.32268	0.321491	0.324105	0.319984	0.323147	0.319021	0.322094	0.321224	0.320775	0.318576	0.322903	0.318872	0.319831	0.315815	0.323257
181	N0059-B	1416106	0.321832	0.322426	0.322138	0.322119	0.324311	0.323651	0.326568	0.323711	0.320499	0.318506	0.322838	0.32185	0.319552	0.31873	0.324558	0.323134	0.324147	0.325803	0.318857	0.31717	0.326178	0.324227	0.324615	0.324215	0.323232	0.322471	0.323775	0.322349	0.32267	0.322591	0.322381	0.320903	0.324419	0.323727	0.32551	0.322501	0.324239	0.322074	0.324383	0.32388	0.324396	0.322851	0.324259	0.321378	0.322162	0.318992	0.325817
182	N0059-T	1425182	0.31973	0.31984	0.320303	0.319632	0.322026	0.321027	0.324821	0.321278	0.318537	0.315843	0.32047	0.319025	0.317114	0.31592	0.322537	0.320584	0.322189	0.323616	0.316801	0.314381	0.324288	0.321579	0.322566	0.321746	0.320719	0.319714	0.321955	0.319901	0.320563	0.320063	0.320245	0.318161	0.322462	0.321288	0.323613	0.319567	0.322307	0.319429	0.322333	0.321499	0.322482	0.320271	0.32253	0.318613	0.320253	0.316311	0.323714
183	N0061-B	1405641	0.324161	0.3245	0.324423	0.324263	0.325793	0.325257	0.328757	0.326304	0.322873	0.321197	0.325276	0.324414	0.32048	0.319736	0.326099	0.324841	0.325161	0.326833	0.321795	0.320316	0.328181	0.326419	0.326991	0.326705	0.324749	0.324042	0.325731	0.324562	0.324013	0.324034	0.323481	0.322147	0.326661	0.326093	0.326543	0.323865	0.325785	0.323546	0.326125	0.325728	0.32585	0.324549	0.325841	0.323114	0.323363	0.320455	0.326913
184	N0061-T	1423780	0.321192	0.321085	0.321636	0.320836	0.322654	0.321793	0.326374	0.323162	0.320148	0.317765	0.322087	0.320823	0.31718	0.316184	0.323049	0.321334	0.322305	0.323912	0.318696	0.316558	0.325323	0.322787	0.324045	0.323339	0.321321	0.320432	0.322934	0.32115	0.320918	0.32062	0.320284	0.318424	0.323728	0.322655	0.323776	0.320038	0.323043	0.320054	0.323198	0.322403	0.322915	0.320988	0.323312	0.319538	0.320502	0.316797	0.323999
185	N0067-B	1412550	0.32346	0.323828	0.323786	0.323538	0.324528	0.323937	0.327681	0.325059	0.322717	0.320914	0.325247	0.324317	0.320711	0.319956	0.326401	0.325128	0.326202	0.327818	0.321908	0.320349	0.327173	0.325246	0.325659	0.325275	0.325307	0.32456	0.325913	0.324568	0.324007	0.324009	0.323446	0.322053	0.326965	0.326289	0.325929	0.323018	0.325213	0.323788	0.326645	0.326262	0.325433	0.323993	0.326583	0.32378	0.32245	0.319399	0.327436
186	N0067-T	1425521	0.321086	0.320965	0.32163	0.320718	0.32201	0.32107	0.3259	0.322476	0.320697	0.318059	0.322711	0.321281	0.317924	0.316817	0.324061	0.322211	0.323941	0.325296	0.31962	0.317251	0.32499	0.322273	0.323434	0.322591	0.32246	0.32151	0.323773	0.321779	0.321632	0.321218	0.321003	0.31893	0.324749	0.32359	0.323868	0.319841	0.323129	0.320801	0.324285	0.323482	0.323119	0.320998	0.324698	0.320761	0.320273	0.316378	0.324995
187	N0073-B	1416882	0.323926	0.324161	0.324278	0.323985	0.326105	0.325464	0.327841	0.325042	0.321987	0.320063	0.326006	0.325083	0.319199	0.318416	0.325951	0.324597	0.325134	0.327	0.321177	0.319429	0.32648	0.324415	0.325933	0.325516	0.323772	0.323042	0.324873	0.323462	0.324456	0.324538	0.324015	0.322545	0.325217	0.3245	0.327392	0.324439	0.325115	0.322808	0.326376	0.325852	0.324702	0.323185	0.327158	0.324287	0.321676	0.318583	0.326515
188	N0073-T	1426246	0.3208	0.320481	0.321193	0.320164	0.322682	0.321621	0.325187	0.321654	0.319061	0.316306	0.322575	0.321024	0.315851	0.314622	0.322671	0.320671	0.321959	0.323566	0.317797	0.315171	0.323406	0.320501	0.322848	0.321907	0.319869	0.318819	0.321935	0.319786	0.321155	0.320773	0.320532	0.318349	0.32228	0.321052	0.324387	0.320055	0.322032	0.318787	0.323246	0.322221	0.32168	0.319496	0.324306	0.320254	0.318609	0.314358	0.323445
189	N0077-B	1420025	0.321072	0.321358	0.321488	0.321049	0.322158	0.321444	0.324915	0.321902	0.320014	0.317858	0.321791	0.320627	0.318029	0.317226	0.323139	0.321594	0.32223	0.32398	0.319066	0.317163	0.324299	0.322032	0.322712	0.322193	0.322112	0.321284	0.323099	0.321434	0.320615	0.320341	0.320737	0.319041	0.323418	0.32256	0.323643	0.3204	0.323271	0.320646	0.323966	0.323424	0.322352	0.320639	0.324081	0.320771	0.320059	0.316676	0.323933
190	N0077-T	1425614	0.319554	0.31948	0.320176	0.319176	0.320523	0.319542	0.323714	0.320131	0.318563	0.315858	0.320048	0.318544	0.316216	0.315119	0.321615	0.319612	0.320743	0.322281	0.317428	0.314887	0.32287	0.319997	0.32118	0.320299	0.320206	0.319177	0.32175	0.31957	0.319016	0.318401	0.319038	0.316791	0.321951	0.320712	0.322233	0.318091	0.321877	0.318602	0.3225	0.321661	0.320848	0.318649	0.322766	0.318645	0.31864	0.314514	0.322387
191	N0078-B	1420392	0.321465	0.32165	0.32173	0.321388	0.322465	0.321758	0.326076	0.323155	0.320353	0.318191	0.321783	0.32069	0.318234	0.317416	0.323475	0.321917	0.322855	0.32436	0.318489	0.316617	0.324575	0.322296	0.322903	0.322423	0.322202	0.321397	0.323553	0.322	0.322404	0.322329	0.32146	0.319818	0.323832	0.323015	0.324841	0.32158	0.323714	0.320541	0.323863	0.323348	0.322538	0.320888	0.323185	0.319909	0.320653	0.317357	0.32494
192	N0078-T	1427150	0.320127	0.319807	0.320468	0.319532	0.320836	0.319768	0.324985	0.321515	0.319104	0.316251	0.32009	0.318516	0.316517	0.315289	0.322029	0.319937	0.321599	0.322901	0.317121	0.314484	0.323231	0.32027	0.321581	0.320674	0.320221	0.319209	0.322279	0.320158	0.320973	0.320466	0.319961	0.317701	0.322471	0.321219	0.323585	0.319269	0.322439	0.318446	0.322469	0.321568	0.321114	0.318871	0.322076	0.317802	0.319312	0.315268	0.323466
193	N0081-B	1409158	0.321831	0.32242	0.322074	0.322048	0.322945	0.32225	0.32574	0.323092	0.320145	0.318314	0.322398	0.321413	0.317105	0.316374	0.324277	0.32292	0.322621	0.324447	0.320105	0.318543	0.325139	0.323157	0.324364	0.323982	0.323338	0.322518	0.323295	0.321997	0.321149	0.321216	0.320739	0.319349	0.32409	0.323392	0.32351	0.320715	0.32309	0.321179	0.322959	0.322569	0.322374	0.320974	0.324494	0.321839	0.320221	0.317095	0.323617
194	N0081-T	1396018	0.323229	0.323666	0.323261	0.323265	0.324408	0.32382	0.326973	0.324682	0.321326	0.319774	0.324063	0.323179	0.31882	0.318132	0.325841	0.324669	0.324101	0.325722	0.321553	0.320248	0.326529	0.324887	0.325937	0.325641	0.32476	0.323954	0.324736	0.323583	0.32276	0.32278	0.322085	0.320888	0.325564	0.324936	0.324915	0.322397	0.324426	0.322764	0.324487	0.32415	0.323986	0.32275	0.325718	0.323517	0.32182	0.318705	0.325346
195	N0084-B	1419652	0.320851	0.321314	0.321249	0.320947	0.322265	0.321514	0.324855	0.321931	0.319497	0.317375	0.321549	0.320447	0.317766	0.316921	0.322288	0.320797	0.321818	0.32373	0.319021	0.317225	0.323695	0.321532	0.323585	0.323175	0.321085	0.320306	0.322589	0.321046	0.321639	0.321604	0.321409	0.319805	0.324093	0.323145	0.323726	0.320485	0.32199	0.319691	0.323122	0.32251	0.322461	0.320798	0.323155	0.320085	0.3188	0.315445	0.323977
196	N0084-T	1427234	0.321244	0.321078	0.321607	0.320608	0.322112	0.321113	0.325534	0.322227	0.320368	0.317695	0.32177	0.320321	0.318023	0.316942	0.322801	0.320921	0.322463	0.323516	0.319519	0.317247	0.324385	0.321643	0.324168	0.323392	0.32136	0.320399	0.322892	0.32096	0.321802	0.3211	0.321741	0.319639	0.324436	0.32315	0.324277	0.320236	0.322402	0.319582	0.323839	0.322863	0.322796	0.320766	0.323738	0.32003	0.319231	0.315267	0.324506
197	N0085-B	1421612	0.321549	0.321658	0.321915	0.321364	0.321964	0.321211	0.324703	0.321663	0.319453	0.317262	0.320251	0.319059	0.31704	0.316103	0.322206	0.320635	0.321809	0.323379	0.318131	0.316199	0.3239	0.32159	0.322926	0.322312	0.319919	0.319122	0.321897	0.320186	0.320523	0.320285	0.320115	0.318447	0.322105	0.321066	0.322829	0.319392	0.322425	0.319	0.322537	0.321898	0.322487	0.32071	0.323872	0.320431	0.319127	0.315561	0.322515
198	N0085-T	1425008	0.320965	0.320793	0.321364	0.32046	0.321273	0.320269	0.32428	0.320903	0.318978	0.316362	0.319558	0.318122	0.316316	0.31521	0.321657	0.319746	0.321261	0.322349	0.317538	0.315237	0.323339	0.320627	0.322505	0.321615	0.319065	0.318109	0.32132	0.319256	0.319754	0.319203	0.319376	0.317338	0.321599	0.320238	0.322265	0.318206	0.321914	0.318061	0.32208	0.321184	0.321899	0.319862	0.323394	0.319434	0.318692	0.314645	0.321938
199	N0087-B	1422415	0.258569	0.258756	0.259342	0.258954	0.279319	0.278374	0.257832	0.254414	0.259664	0.257125	0.252793	0.251453	0.255872	0.254764	0.254553	0.252983	0.254138	0.256258	0.25332	0.25108	0.255169	0.252523	0.253501	0.252873	0.252712	0.251811	0.254929	0.253021	0.253242	0.253072	0.25342	0.251605	0.252981	0.251909	0.253126	0.249575	0.253185	0.250701	0.254864	0.254147	0.253104	0.250933	0.25435	0.250608	0.257352	0.254999	0.254136
200	N0087-T	1425644	0.257915	0.257807	0.258705	0.257983	0.278437	0.277305	0.257267	0.253569	0.258957	0.25599	0.25184	0.250242	0.255008	0.253688	0.253817	0.251876	0.253343	0.255226	0.252529	0.249841	0.254429	0.25141	0.252766	0.251921	0.251681	0.250666	0.254296	0.252082	0.252493	0.25205	0.252786	0.25055	0.25243	0.251136	0.25254	0.248284	0.252589	0.249588	0.254155	0.253195	0.252411	0.24992	0.253608	0.249357	0.256725	0.253773	0.253443
201	N0088-B	1422299	0.321594	0.321825	0.32188	0.321543	0.322487	0.32162	0.325733	0.322572	0.3206	0.318294	0.3223	0.321077	0.317787	0.316956	0.322936	0.321279	0.323008	0.324449	0.318241	0.316275	0.323522	0.321201	0.323343	0.32265	0.322044	0.321247	0.321751	0.319989	0.321637	0.321461	0.320633	0.318889	0.323626	0.322683	0.324575	0.32108	0.322891	0.31976	0.323693	0.323092	0.322732	0.320952	0.324707	0.321324	0.320263	0.316766	0.324032
202	N0088-T	1426141	0.320853	0.320734	0.321239	0.320478	0.321601	0.32054	0.325141	0.321645	0.32008	0.31735	0.321417	0.319937	0.317079	0.316022	0.322224	0.320251	0.322299	0.323512	0.317466	0.315082	0.322987	0.320226	0.322642	0.321725	0.321157	0.320124	0.321187	0.319097	0.320943	0.320537	0.319849	0.317753	0.323034	0.321814	0.323882	0.319772	0.322207	0.318771	0.323016	0.322142	0.321968	0.319883	0.324145	0.320213	0.319677	0.315739	0.323369
203	SMU019-B	1419578	0.322852	0.323186	0.323173	0.322964	0.323431	0.32276	0.327741	0.324723	0.320219	0.318073	0.323145	0.322044	0.319375	0.318486	0.324001	0.322471	0.323482	0.325103	0.320196	0.318405	0.325425	0.323216	0.325008	0.324516	0.323184	0.322337	0.325102	0.323546	0.322789	0.322592	0.322927	0.321328	0.325072	0.324223	0.325918	0.322734	0.323775	0.320953	0.324725	0.324191	0.323745	0.32207	0.326454	0.323291	0.321904	0.318563	0.325676
204	SMU019-T	1425784	0.321219	0.321103	0.321669	0.320913	0.321709	0.320739	0.326393	0.322765	0.318729	0.315992	0.321245	0.319744	0.317424	0.316263	0.322273	0.320354	0.321738	0.323255	0.318499	0.316125	0.323831	0.321016	0.323312	0.322534	0.321059	0.320073	0.323535	0.321507	0.320993	0.320491	0.321155	0.319066	0.323385	0.322181	0.324375	0.320372	0.322195	0.318763	0.322994	0.322161	0.322083	0.319875	0.325046	0.321018	0.320243	0.316325	0.323945
205	SMU027-B	1417406	0.322082	0.322521	0.322435	0.322307	0.323613	0.322973	0.325956	0.323026	0.320461	0.318421	0.322397	0.321367	0.319112	0.318278	0.323731	0.32233	0.323553	0.325267	0.319907	0.318236	0.324758	0.322663	0.324225	0.323796	0.322367	0.321482	0.323358	0.321787	0.322686	0.322707	0.3225	0.32092	0.324414	0.323544	0.324731	0.321629	0.323078	0.320737	0.323936	0.323409	0.324032	0.322483	0.324242	0.321172	0.321102	0.317938	0.325229
206	SMU027-T	1427334	0.320648	0.320394	0.321126	0.32017	0.321908	0.320869	0.324767	0.321137	0.319221	0.31639	0.320635	0.319079	0.317286	0.316073	0.322258	0.320295	0.32198	0.323485	0.318318	0.315855	0.323405	0.320499	0.322813	0.321923	0.320245	0.31916	0.322046	0.319906	0.321194	0.320701	0.320834	0.31861	0.322833	0.321512	0.323435	0.319189	0.321642	0.318449	0.322399	0.32149	0.322541	0.32036	0.323059	0.318957	0.319665	0.315682	0.323597
207	SMU029-B	1419612	0.321457	0.321779	0.321746	0.321521	0.324257	0.323509	0.326302	0.323318	0.320935	0.318868	0.32316	0.32207	0.318498	0.317668	0.32525	0.323756	0.323278	0.324973	0.319738	0.317964	0.324878	0.322761	0.324079	0.323542	0.322901	0.322154	0.322917	0.32135	0.322773	0.322662	0.322614	0.321003	0.324786	0.323885	0.325208	0.322027	0.324506	0.321322	0.324251	0.323776	0.323553	0.321891	0.325206	0.322154	0.321557	0.31821	0.324071
208	SMU029-T	1427972	0.319728	0.319542	0.320256	0.31935	0.32223	0.321147	0.324972	0.321252	0.319448	0.316617	0.321207	0.319583	0.316534	0.315287	0.323557	0.321421	0.321623	0.323037	0.318057	0.315424	0.32326	0.320317	0.322326	0.321299	0.320685	0.319607	0.321381	0.319173	0.321048	0.32039	0.320706	0.318381	0.323149	0.321791	0.323623	0.31923	0.322931	0.31888	0.322577	0.321685	0.321901	0.319601	0.323855	0.319716	0.319975	0.315747	0.322302
209	SMU030-B	1416589	0.323698	0.323999	0.324029	0.323774	0.324359	0.323684	0.32665	0.32372	0.321543	0.319534	0.323536	0.32252	0.320672	0.319856	0.324571	0.323141	0.324258	0.325927	0.320824	0.319149	0.326894	0.324857	0.325682	0.325298	0.324671	0.323909	0.325041	0.323579	0.324002	0.323975	0.323119	0.321625	0.324587	0.323729	0.324951	0.322016	0.323939	0.321677	0.325178	0.324714	0.324477	0.322912	0.325512	0.322641	0.322773	0.319628	0.325213
210	SMU030-T	1427033	0.322038	0.3216	0.322561	0.321461	0.322385	0.32136	0.32528	0.32166	0.319923	0.317214	0.321474	0.319997	0.318508	0.317334	0.322925	0.320946	0.322395	0.323777	0.318976	0.316633	0.325244	0.32245	0.323871	0.32308	0.322383	0.321401	0.323458	0.321303	0.322076	0.321589	0.321162	0.319068	0.322855	0.321522	0.323311	0.319324	0.322285	0.319266	0.3234	0.32254	0.322662	0.320461	0.324147	0.320207	0.321078	0.317216	0.323407
211	SMU032-B	1421626	0.320998	0.321145	0.321416	0.32087	0.322194	0.321366	0.324754	0.321564	0.320205	0.317946	0.322025	0.320939	0.317448	0.316609	0.323001	0.321435	0.321782	0.32342	0.318056	0.316193	0.323094	0.320806	0.323346	0.322755	0.321921	0.321094	0.322468	0.320839	0.320308	0.320225	0.320871	0.319185	0.323847	0.322878	0.32368	0.320219	0.322538	0.320076	0.322922	0.322354	0.322884	0.321016	0.322905	0.319511	0.319521	0.316051	0.325168
212	SMU032-T	1426189	0.319765	0.3196	0.320364	0.319373	0.320876	0.319819	0.323816	0.320259	0.319173	0.316455	0.320727	0.319291	0.316112	0.314983	0.321755	0.319799	0.320656	0.322138	0.316862	0.31447	0.322031	0.319244	0.322202	0.321324	0.320565	0.319501	0.321398	0.319354	0.319156	0.318777	0.319563	0.317456	0.322746	0.321444	0.32265	0.318483	0.321384	0.318515	0.321813	0.321017	0.32177	0.319502	0.322011	0.317953	0.318461	0.314451	0.323939
213	SMU039-B	1421949	0.322259	0.322533	0.322481	0.322168	0.322003	0.321215	0.325368	0.322246	0.320221	0.318093	0.322524	0.321435	0.317392	0.316522	0.324159	0.322605	0.323852	0.325666	0.319824	0.317962	0.324693	0.322459	0.324157	0.323546	0.322257	0.321455	0.323937	0.322341	0.322303	0.322125	0.32113	0.319503	0.323729	0.322742	0.323719	0.32041	0.323223	0.321289	0.324219	0.323696	0.322417	0.320596	0.323979	0.320628	0.320238	0.316868	0.32388
214	SMU039-T	1425978	0.321198	0.321213	0.321503	0.320891	0.320875	0.319888	0.324436	0.320925	0.319254	0.316658	0.321371	0.319948	0.316145	0.315086	0.323055	0.321251	0.322757	0.324506	0.318718	0.316473	0.32361	0.320952	0.323051	0.322268	0.320901	0.320013	0.322928	0.320975	0.32119	0.320796	0.320048	0.318019	0.322727	0.321556	0.322802	0.318846	0.322334	0.319809	0.323217	0.32245	0.321303	0.319113	0.323148	0.319195	0.319211	0.315384	0.322852
215	SMU041-B	1420502	0.320883	0.321347	0.321347	0.321098	0.322467	0.321716	0.325413	0.322428	0.320063	0.317766	0.322082	0.321007	0.317632	0.316804	0.323736	0.322043	0.323372	0.324841	0.319	0.317113	0.324174	0.321882	0.324009	0.323539	0.322582	0.321742	0.322062	0.320424	0.321581	0.32158	0.321681	0.320082	0.324199	0.323301	0.324879	0.321582	0.322347	0.320347	0.324017	0.323434	0.323079	0.321373	0.324927	0.321614	0.319417	0.315993	0.324727
216	SMU041-T	1428417	0.319191	0.319055	0.319757	0.318901	0.320508	0.319388	0.324032	0.320314	0.318484	0.315499	0.320071	0.318452	0.315553	0.314302	0.321926	0.319684	0.321537	0.322722	0.317211	0.31452	0.322525	0.319459	0.322165	0.321236	0.320326	0.319216	0.320391	0.318133	0.319797	0.319302	0.319763	0.317451	0.322587	0.321184	0.323282	0.318793	0.320586	0.317876	0.322209	0.321287	0.321285	0.318928	0.323494	0.319102	0.317768	0.31354	0.32293
217	SMU047-B	1419060	0.322323	0.322623	0.322749	0.322363	0.323377	0.322652	0.325576	0.32265	0.320519	0.318473	0.322034	0.320921	0.317883	0.317076	0.324382	0.32293	0.322728	0.324541	0.31933	0.317605	0.324746	0.322548	0.324727	0.324235	0.322269	0.321554	0.32339	0.321917	0.322304	0.32232	0.321913	0.320358	0.324726	0.323788	0.324189	0.321059	0.322624	0.321891	0.324661	0.324072	0.322836	0.32113	0.324011	0.320886	0.320867	0.317729	0.325437
218	SMU047-T	1428489	0.320162	0.31977	0.320839	0.319719	0.321031	0.319898	0.323813	0.320082	0.318627	0.315753	0.319534	0.317854	0.315393	0.314119	0.322283	0.320245	0.320572	0.322246	0.317197	0.314601	0.322735	0.319641	0.322651	0.321681	0.319507	0.318545	0.321442	0.319243	0.320095	0.319615	0.319733	0.317396	0.32266	0.321216	0.322229	0.317855	0.320697	0.319007	0.322532	0.32162	0.320732	0.318238	0.322274	0.317883	0.318863	0.314855	0.323233
219	SMU050-B	1423136	0.320933	0.321009	0.321342	0.320832	0.321625	0.320808	0.324638	0.321411	0.319173	0.316848	0.320989	0.319768	0.316684	0.315694	0.322073	0.320337	0.323246	0.324896	0.318684	0.316696	0.324222	0.321814	0.324486	0.323833	0.321624	0.320774	0.320237	0.318502	0.321033	0.32079	0.320398	0.318673	0.323366	0.322309	0.323823	0.320369	0.322253	0.319467	0.322633	0.322034	0.321849	0.320057	0.324305	0.320833	0.319623	0.316193	0.323922
220	SMU050-T	1427456	0.320457	0.320141	0.320994	0.320029	0.320959	0.319947	0.324345	0.320727	0.318718	0.315981	0.320393	0.318876	0.315909	0.314678	0.321507	0.319481	0.322754	0.324064	0.318078	0.315626	0.323642	0.320838	0.324029	0.323154	0.320791	0.319828	0.319821	0.317712	0.320498	0.31998	0.319759	0.317674	0.322884	0.321496	0.32332	0.319259	0.321784	0.318554	0.322165	0.321295	0.321435	0.319232	0.323849	0.319788	0.319157	0.315325	0.323219
221	SMU061-B	1422382	0.321711	0.321563	0.321936	0.321204	0.321639	0.320841	0.326456	0.323336	0.320584	0.318304	0.322289	0.321093	0.318243	0.31732	0.324276	0.322588	0.323149	0.324824	0.318592	0.316541	0.324618	0.322163	0.32472	0.324073	0.3225	0.321585	0.323288	0.321595	0.322489	0.322336	0.321032	0.319365	0.324061	0.323092	0.324246	0.320721	0.322491	0.320607	0.324584	0.323865	0.322507	0.320688	0.324045	0.320718	0.320365	0.316847	0.324934
222	SMU061-T	1427495	0.320954	0.320198	0.321342	0.319941	0.320839	0.319739	0.326028	0.32249	0.319949	0.317204	0.321409	0.319795	0.317358	0.316179	0.3236	0.32151	0.322594	0.323848	0.317926	0.315274	0.324045	0.321033	0.323977	0.323071	0.321486	0.320359	0.322826	0.320651	0.321858	0.321157	0.320134	0.317974	0.323408	0.322084	0.32354	0.319228	0.321857	0.319518	0.32386	0.322867	0.321915	0.31966	0.32357	0.319548	0.31985	0.315769	0.324318
223	SMU062-B	1414498	0.321465	0.321934	0.321812	0.321707	0.32413	0.323498	0.326024	0.32325	0.319872	0.317969	0.323148	0.322155	0.318255	0.317579	0.323934	0.322581	0.322827	0.324643	0.320042	0.318469	0.324583	0.322658	0.324724	0.324337	0.322883	0.322186	0.322953	0.321509	0.321056	0.321022	0.321337	0.319952	0.324395	0.323667	0.325078	0.32212	0.323757	0.320847	0.32359	0.323079	0.32266	0.321082	0.324819	0.321949	0.320214	0.317129	0.324833
224	SMU062-T	1428202	0.318931	0.318729	0.319515	0.318544	0.32135	0.32022	0.323961	0.320306	0.31768	0.314797	0.320253	0.318612	0.315301	0.314103	0.321368	0.319323	0.32035	0.321933	0.317468	0.314921	0.322216	0.319302	0.322106	0.321147	0.319612	0.318626	0.320604	0.31833	0.318388	0.317826	0.318596	0.316282	0.321996	0.320612	0.322729	0.318269	0.321354	0.317469	0.32105	0.320064	0.320158	0.317714	0.322831	0.318516	0.317815	0.313649	0.322201
225	SMU064-B	1417382	0.320885	0.3214	0.321107	0.321112	0.322128	0.321498	0.324751	0.321844	0.319708	0.317733	0.322119	0.321106	0.319154	0.318301	0.323464	0.322089	0.32296	0.324666	0.318885	0.317222	0.32455	0.322509	0.324047	0.3236	0.322341	0.321581	0.322076	0.320612	0.321879	0.321801	0.321521	0.320036	0.323524	0.322754	0.325123	0.322106	0.322638	0.320575	0.323092	0.32266	0.323169	0.321575	0.324071	0.320978	0.319536	0.316381	0.323989
226	SMU064-T	1426982	0.31873	0.318715	0.319238	0.318499	0.319774	0.318838	0.3231	0.319438	0.317794	0.315105	0.319726	0.318232	0.316733	0.315558	0.321348	0.319452	0.320935	0.322427	0.316792	0.314405	0.3226	0.319858	0.321895	0.321056	0.319774	0.318767	0.32012	0.318017	0.319612	0.31915	0.319281	0.317169	0.321517	0.320271	0.323234	0.319168	0.320701	0.317828	0.32087	0.320082	0.321056	0.31883	0.322357	0.318247	0.317565	0.313682	0.321767
227	SMU068-B	1418602	0.321717	0.322072	0.322032	0.321764	0.323878	0.323171	0.32612	0.323132	0.319756	0.317709	0.323322	0.322192	0.317632	0.316818	0.32513	0.323661	0.322778	0.324403	0.319383	0.317583	0.325371	0.323173	0.32453	0.324083	0.323161	0.322376	0.323617	0.322075	0.322768	0.322685	0.32265	0.321019	0.326115	0.325242	0.325022	0.321951	0.324156	0.321923	0.323827	0.323312	0.323366	0.321695	0.324755	0.321649	0.321053	0.317801	0.324963
228	SMU068-T	1426686	0.321779	0.321603	0.322145	0.321324	0.323702	0.322796	0.326346	0.323014	0.319851	0.31736	0.323315	0.321877	0.317645	0.316665	0.325004	0.323238	0.322863	0.323878	0.319425	0.317285	0.325388	0.322823	0.324609	0.323844	0.323071	0.322126	0.323517	0.321641	0.322926	0.322477	0.322595	0.32067	0.326276	0.325125	0.325201	0.321524	0.324267	0.32164	0.323826	0.323125	0.323536	0.32162	0.324939	0.321357	0.321065	0.317394	0.324979
229	SMU076-B	1421908	0.321413	0.321511	0.32171	0.321087	0.32061	0.319818	0.324805	0.321667	0.318635	0.316383	0.321301	0.320123	0.317197	0.316229	0.321685	0.320073	0.321391	0.322961	0.319104	0.317171	0.323482	0.321059	0.323387	0.322751	0.321285	0.32044	0.321978	0.320259	0.320253	0.320033	0.319484	0.317728	0.322367	0.321296	0.323937	0.3206	0.321464	0.319243	0.323149	0.322534	0.322069	0.320297	0.323073	0.31967	0.32106	0.317561	0.322975
230	SMU076-T	1427320	0.320012	0.31967	0.320457	0.319319	0.319081	0.317948	0.323688	0.320052	0.317423	0.314596	0.319756	0.318168	0.315628	0.314355	0.320334	0.318269	0.319987	0.32135	0.317723	0.315192	0.322208	0.319211	0.322019	0.321047	0.319493	0.318451	0.320738	0.318591	0.318896	0.318342	0.318011	0.315671	0.321032	0.319573	0.322702	0.318372	0.320212	0.317252	0.321753	0.320796	0.32078	0.318456	0.32193	0.317713	0.319768	0.315583	0.321602
231	SMU079-B	1421241	0.322596	0.322893	0.322909	0.322554	0.323003	0.322291	0.327409	0.32432	0.320659	0.318489	0.323927	0.322842	0.318482	0.317632	0.324974	0.323407	0.324526	0.326113	0.320391	0.318499	0.325061	0.322845	0.325229	0.324656	0.324279	0.323466	0.323643	0.321991	0.323194	0.32292	0.32305	0.3214	0.324422	0.32353	0.326115	0.322928	0.324302	0.321727	0.326108	0.325529	0.32458	0.322845	0.325961	0.322749	0.321288	0.317957	0.325302
232	SMU079-T	1426142	0.321323	0.321264	0.321761	0.320966	0.321671	0.320664	0.326382	0.322806	0.319435	0.316752	0.322338	0.320917	0.316996	0.315876	0.323635	0.321666	0.323223	0.324685	0.319011	0.316608	0.323845	0.321049	0.323808	0.322934	0.322634	0.321617	0.322457	0.32039	0.321838	0.32129	0.321596	0.319501	0.323133	0.321935	0.324855	0.320879	0.323053	0.319906	0.324763	0.32393	0.323246	0.321053	0.324881	0.320914	0.319993	0.316118	0.323917
233	SMU080-B	1415706	0.322689	0.323099	0.322982	0.322787	0.324637	0.323963	0.327131	0.324256	0.321815	0.319886	0.324134	0.323119	0.319922	0.31915	0.324733	0.323409	0.323961	0.325696	0.320875	0.319207	0.325931	0.323932	0.325905	0.32553	0.324315	0.323552	0.324246	0.322869	0.324221	0.324043	0.323652	0.322147	0.326457	0.325724	0.325401	0.322478	0.324508	0.32274	0.32486	0.324406	0.3251	0.323544	0.326889	0.323913	0.322134	0.318951	0.326577
234	SMU080-T	1425919	0.321801	0.321616	0.322239	0.321334	0.3236	0.322649	0.326655	0.32324	0.321174	0.318605	0.323229	0.321816	0.318753	0.317729	0.323778	0.322033	0.323179	0.324403	0.319923	0.317757	0.325281	0.322636	0.325071	0.324377	0.323001	0.322033	0.323505	0.3216	0.323141	0.322629	0.322795	0.320793	0.325553	0.324406	0.324755	0.320903	0.323783	0.321325	0.324069	0.323278	0.324045	0.322019	0.326167	0.322372	0.321401	0.317559	0.325678
235	SMU083-B	1418976	0.3231	0.323426	0.323495	0.323169	0.324895	0.324164	0.327177	0.324298	0.322125	0.320057	0.323887	0.322738	0.320076	0.319282	0.325569	0.324058	0.323637	0.325359	0.321106	0.319361	0.325678	0.323577	0.325312	0.324769	0.324154	0.323237	0.325611	0.324066	0.323155	0.323053	0.324007	0.322444	0.324888	0.324021	0.326287	0.323089	0.325005	0.322187	0.324391	0.323814	0.325236	0.32354	0.325567	0.322324	0.3213	0.318041	0.326288
236	SMU083-T	1426006	0.322288	0.32225	0.322773	0.322058	0.323778	0.322837	0.326668	0.323302	0.321439	0.318917	0.322949	0.321521	0.31902	0.317978	0.324748	0.322898	0.322914	0.32428	0.320228	0.317965	0.324842	0.322291	0.324515	0.323693	0.323171	0.322133	0.324854	0.322921	0.322275	0.321861	0.323111	0.321157	0.324152	0.322953	0.325479	0.321666	0.324216	0.320974	0.323472	0.322679	0.324509	0.322469	0.324919	0.321089	0.320602	0.316823	0.325396
237	SMU087-B	1421936	0.320966	0.321183	0.321346	0.320904	0.322126	0.321338	0.32621	0.323016	0.320561	0.318282	0.321315	0.320128	0.317559	0.316675	0.32218	0.320542	0.322201	0.323672	0.319315	0.31738	0.32414	0.321791	0.322905	0.322292	0.322809	0.321964	0.321705	0.319984	0.321859	0.321649	0.321196	0.319448	0.32367	0.32275	0.3241	0.320548	0.321856	0.319591	0.322883	0.322279	0.322701	0.320816	0.323522	0.320144	0.319573	0.316104	0.32364
238	SMU087-T	1426770	0.32063	0.320336	0.321124	0.320091	0.321594	0.320598	0.325899	0.322401	0.320163	0.317508	0.320697	0.319217	0.316963	0.315764	0.321701	0.319703	0.321749	0.322815	0.31883	0.316445	0.323708	0.320926	0.322386	0.321521	0.322063	0.320974	0.321339	0.319263	0.321422	0.320935	0.320694	0.318478	0.323273	0.322081	0.323648	0.319444	0.321409	0.318721	0.322377	0.321554	0.322202	0.319983	0.323212	0.319272	0.319092	0.315082	0.323138
239	SMU089-B	1422421	0.322436	0.322348	0.322872	0.322049	0.323041	0.322238	0.327832	0.324755	0.320656	0.318387	0.324272	0.323091	0.31945	0.318415	0.324572	0.322934	0.323133	0.3247	0.320646	0.318739	0.325628	0.323244	0.324684	0.324127	0.322981	0.32205	0.323212	0.321502	0.321961	0.321712	0.322632	0.320915	0.325926	0.324905	0.325092	0.321704	0.323468	0.321792	0.324764	0.324126	0.324312	0.322632	0.325876	0.322599	0.322391	0.318954	0.323966
240	SMU089-T	1428393	0.320916	0.320328	0.3215	0.320093	0.321339	0.320156	0.326481	0.322839	0.319271	0.316393	0.322455	0.320821	0.317671	0.316243	0.323066	0.320968	0.321589	0.323036	0.319065	0.316391	0.324224	0.321121	0.323106	0.322118	0.320977	0.31986	0.321817	0.319578	0.320321	0.319685	0.320917	0.318569	0.324466	0.323021	0.32367	0.31922	0.322	0.319603	0.323227	0.322221	0.322846	0.32053	0.32464	0.320365	0.32091	0.316781	0.322305
241	SMU091-B	1422855	0.322366	0.322441	0.322721	0.322132	0.322964	0.322146	0.326003	0.322768	0.321008	0.318741	0.322523	0.321336	0.318593	0.317631	0.324072	0.322327	0.323789	0.325256	0.319764	0.31766	0.325712	0.323241	0.324309	0.323613	0.323052	0.322106	0.323176	0.321426	0.32235	0.321968	0.322258	0.320403	0.324974	0.324028	0.325208	0.321582	0.323906	0.320431	0.325305	0.324746	0.324447	0.322522	0.324514	0.321072	0.320831	0.317186	0.325026
242	SMU091-T	1429132	0.320816	0.320362	0.321333	0.320151	0.321222	0.320037	0.32474	0.320876	0.319603	0.316644	0.320776	0.319033	0.316781	0.315418	0.322517	0.320236	0.322262	0.323518	0.318176	0.315298	0.324237	0.32106	0.322703	0.321622	0.320938	0.319766	0.321703	0.319374	0.320712	0.319917	0.320496	0.317978	0.323416	0.322048	0.323723	0.318961	0.322507	0.31819	0.32379	0.322835	0.322846	0.320339	0.32319	0.318744	0.3194	0.315033	0.323377
243	SMU094-B	1420240	0.323207	0.323582	0.323638	0.323303	0.324756	0.324013	0.32663	0.32369	0.322432	0.320267	0.323224	0.322158	0.319026	0.318191	0.324994	0.32346	0.324359	0.32593	0.321777	0.320032	0.325986	0.323797	0.325725	0.32523	0.324124	0.323276	0.324521	0.322939	0.322478	0.322398	0.323669	0.322038	0.325419	0.324564	0.325038	0.32193	0.32412	0.32226	0.324939	0.324423	0.324762	0.323118	0.32644	0.3234	0.32198	0.318779	0.325684
244	SMU094-T	1426756	0.321388	0.321293	0.321907	0.321044	0.322719	0.321699	0.325197	0.321602	0.320743	0.317942	0.321165	0.319669	0.316891	0.315729	0.323085	0.321126	0.322426	0.323947	0.319919	0.317537	0.324227	0.321427	0.323916	0.323083	0.321727	0.320776	0.322717	0.320655	0.320498	0.320073	0.321735	0.319572	0.323623	0.322359	0.32339	0.319251	0.322417	0.319841	0.323109	0.322225	0.322896	0.320684	0.324893	0.320883	0.320184	0.316375	0.323762
245	SMU097-B	1420663	0.321172	0.321369	0.321419	0.321051	0.3214	0.320711	0.324612	0.321585	0.320088	0.317868	0.322957	0.321843	0.318366	0.317473	0.323166	0.321615	0.323075	0.324629	0.319203	0.317405	0.324951	0.322742	0.322759	0.322203	0.322172	0.321395	0.322944	0.321364	0.321592	0.321409	0.321165	0.319574	0.324081	0.323185	0.323908	0.320688	0.322975	0.320031	0.323796	0.323164	0.322432	0.320681	0.324596	0.321326	0.320334	0.317086	0.324009
246	SMU097-T	1427303	0.319438	0.31909	0.319913	0.318925	0.319617	0.318503	0.323148	0.319563	0.318588	0.315745	0.321024	0.319412	0.316364	0.315091	0.32145	0.319349	0.321383	0.322705	0.317571	0.315039	0.323386	0.3204	0.320989	0.320045	0.320002	0.318938	0.321357	0.319229	0.31984	0.319238	0.319247	0.316975	0.322478	0.321162	0.32238	0.318086	0.321328	0.317726	0.322042	0.321176	0.320734	0.318386	0.323191	0.318976	0.318662	0.314666	0.322189
247	SMU098-B	1417201	0.321557	0.321773	0.321817	0.321455	0.323045	0.322369	0.326473	0.323743	0.320439	0.318476	0.322871	0.321833	0.318034	0.317243	0.323181	0.321779	0.32323	0.32488	0.319947	0.318278	0.324607	0.32249	0.324152	0.323702	0.323219	0.32243	0.323252	0.32168	0.322236	0.322101	0.321726	0.320223	0.32417	0.323335	0.32492	0.321943	0.322698	0.321774	0.32315	0.322665	0.323888	0.322343	0.324449	0.32152	0.319931	0.316699	0.324893
248	SMU098-T	1426185	0.319915	0.319648	0.320312	0.319349	0.321348	0.32038	0.325229	0.321782	0.319176	0.316479	0.321048	0.319618	0.316191	0.315082	0.321698	0.319764	0.321719	0.323002	0.318362	0.316072	0.32323	0.32046	0.322652	0.321782	0.321192	0.32018	0.321942	0.319776	0.320615	0.320031	0.320084	0.317997	0.322722	0.321432	0.323555	0.319548	0.321294	0.319604	0.32161	0.320778	0.322413	0.320306	0.323278	0.319457	0.318574	0.314662	0.323242
249	SMU100-B	1417751	0.32126	0.321493	0.321672	0.321246	0.322042	0.32126	0.325495	0.32254	0.320282	0.318212	0.32272	0.321631	0.318068	0.317222	0.323414	0.321907	0.32312	0.324929	0.318848	0.317083	0.324738	0.322509	0.32314	0.322632	0.322786	0.321915	0.32381	0.322295	0.321969	0.321862	0.321135	0.31965	0.324916	0.324024	0.32453	0.321414	0.322486	0.32125	0.323968	0.323488	0.323721	0.321984	0.323741	0.320718	0.320303	0.317105	0.324736
250	SMU100-T	1425515	0.319661	0.319438	0.320173	0.319153	0.320215	0.319129	0.324168	0.32058	0.318792	0.316041	0.320774	0.31924	0.316106	0.314928	0.321701	0.319726	0.321456	0.323121	0.317072	0.31466	0.323171	0.320281	0.321459	0.320559	0.32053	0.319479	0.322221	0.320194	0.320242	0.319757	0.319342	0.317248	0.323334	0.322016	0.32295	0.318815	0.320962	0.318997	0.322356	0.32149	0.322096	0.319802	0.322474	0.318439	0.318778	0.314817	0.323058
251	SMU101-B	1421531	0.320274	0.320414	0.320667	0.320177	0.321007	0.320234	0.323402	0.320223	0.318552	0.316314	0.319993	0.318839	0.316753	0.315859	0.322992	0.321379	0.321106	0.32273	0.318379	0.316434	0.32346	0.32118	0.323612	0.323032	0.320526	0.319641	0.321233	0.319582	0.321162	0.321031	0.320055	0.31826	0.322095	0.321239	0.323408	0.320144	0.321625	0.319103	0.32319	0.322653	0.321964	0.320251	0.32312	0.319786	0.318334	0.314826	0.322914
252	SMU101-T	1427535	0.31875	0.318419	0.319272	0.318251	0.319318	0.318195	0.322183	0.318471	0.317284	0.314406	0.318237	0.316605	0.315013	0.313701	0.321482	0.319355	0.319612	0.321042	0.316859	0.314187	0.32209	0.319118	0.322099	0.321146	0.318414	0.31735	0.319864	0.317644	0.31962	0.319056	0.318346	0.315961	0.320674	0.319395	0.322135	0.317816	0.320232	0.317013	0.321625	0.320751	0.320488	0.318213	0.321841	0.317608	0.316873	0.31264	0.321354
253	SMU104-B	1419423	0.323328	0.323514	0.323754	0.323304	0.324365	0.323586	0.327027	0.324018	0.321901	0.319923	0.323967	0.322939	0.320069	0.319214	0.325637	0.324113	0.324397	0.326106	0.320823	0.319176	0.326299	0.324181	0.326423	0.325992	0.323311	0.322503	0.325379	0.32391	0.323539	0.3233	0.323771	0.322154	0.326183	0.325366	0.326321	0.323266	0.324489	0.322241	0.326428	0.32591	0.325718	0.324083	0.324919	0.321878	0.322647	0.319496	0.325862
254	SMU104-T	1426924	0.321574	0.321216	0.322152	0.321075	0.322428	0.32134	0.325586	0.321897	0.320348	0.317642	0.321946	0.320498	0.317899	0.316678	0.323894	0.321859	0.322626	0.324179	0.319105	0.316696	0.324586	0.321752	0.324506	0.323647	0.321113	0.32015	0.323775	0.321729	0.321677	0.321079	0.32193	0.319701	0.324462	0.323231	0.324727	0.320706	0.322871	0.319871	0.324608	0.323754	0.323924	0.321651	0.323472	0.319461	0.320955	0.317117	0.324038
255	SMU106-B	1419734	0.321925	0.322184	0.322418	0.321896	0.323129	0.322431	0.326301	0.323366	0.320986	0.31893	0.322673	0.32156	0.318829	0.31801	0.32336	0.321804	0.324319	0.325977	0.320167	0.318303	0.325986	0.323752	0.324301	0.3238	0.322344	0.321504	0.322982	0.321449	0.322578	0.322431	0.322117	0.320561	0.325498	0.324735	0.324792	0.321595	0.322843	0.320855	0.324281	0.323761	0.324812	0.323146	0.323855	0.320819	0.321208	0.317826	0.323994
256	SMU106-T	1428085	0.320049	0.319728	0.3207	0.319558	0.321052	0.319975	0.324732	0.321015	0.319254	0.316412	0.320388	0.318746	0.316624	0.315346	0.321491	0.31935	0.322445	0.32386	0.318309	0.315594	0.324193	0.321162	0.322407	0.321453	0.319807	0.318702	0.321282	0.319068	0.320541	0.319999	0.320093	0.31785	0.323716	0.322382	0.323065	0.318657	0.321083	0.318214	0.322392	0.321512	0.322964	0.320614	0.322379	0.318154	0.319291	0.315112	0.321986
257	SMU107-B	1421782	0.320715	0.320971	0.321149	0.320799	0.322589	0.321797	0.325546	0.322422	0.320135	0.317945	0.322483	0.321402	0.318372	0.317431	0.323484	0.321801	0.324169	0.32585	0.318851	0.316909	0.324918	0.322624	0.324513	0.32389	0.32223	0.321365	0.322874	0.321203	0.321922	0.321808	0.321111	0.31942	0.324496	0.323421	0.324405	0.321091	0.322758	0.32112	0.323097	0.322495	0.323808	0.322069	0.324316	0.320996	0.320193	0.316775	0.325503
258	SMU107-T	1427361	0.31921	0.319027	0.319798	0.318928	0.320941	0.319857	0.324234	0.320542	0.318701	0.315909	0.320678	0.319143	0.316594	0.315323	0.321894	0.319763	0.322589	0.324132	0.31725	0.314639	0.323474	0.320511	0.323006	0.322043	0.320198	0.319113	0.321442	0.319253	0.320244	0.319745	0.319446	0.317153	0.323027	0.321555	0.323004	0.3187	0.321289	0.319068	0.321533	0.320587	0.322248	0.319901	0.323014	0.31874	0.318754	0.31466	0.323916
259	SMU109-B	1420485	0.321357	0.321479	0.321514	0.321192	0.322905	0.32219	0.326181	0.323245	0.319078	0.316924	0.323636	0.322619	0.318156	0.317306	0.323379	0.321853	0.322505	0.324355	0.319126	0.317342	0.324588	0.322357	0.323498	0.322984	0.321742	0.321037	0.321896	0.320207	0.322176	0.322031	0.320803	0.319224	0.3244	0.323561	0.324557	0.321238	0.323141	0.321299	0.324267	0.323604	0.322566	0.320823	0.324917	0.321777	0.320881	0.317634	0.324197
260	SMU109-T	1426859	0.320941	0.320565	0.321319	0.32038	0.322237	0.321231	0.325962	0.322544	0.318775	0.316058	0.322886	0.321539	0.317406	0.316299	0.322937	0.321059	0.322047	0.323259	0.318495	0.316298	0.32424	0.32151	0.322899	0.322103	0.320997	0.320059	0.321424	0.319307	0.321552	0.321144	0.320157	0.318202	0.324069	0.322834	0.3241	0.320164	0.322669	0.320355	0.323743	0.322881	0.322061	0.31991	0.324711	0.320968	0.320553	0.316787	0.323617
261	SMU111-B	1418645	0.322251	0.322451	0.322437	0.322142	0.323814	0.323097	0.327029	0.324118	0.320861	0.318735	0.32298	0.321842	0.318517	0.317692	0.323785	0.322237	0.323602	0.325099	0.319149	0.317272	0.325861	0.323681	0.324301	0.323775	0.322928	0.322061	0.323924	0.322414	0.321643	0.321556	0.321811	0.320236	0.32461	0.323809	0.324667	0.321409	0.323207	0.321611	0.324456	0.323942	0.324522	0.322913	0.324403	0.321248	0.321685	0.318231	0.325475
262	SMU111-T	1427513	0.320143	0.319768	0.320582	0.319513	0.321467	0.320324	0.325299	0.321581	0.318908	0.315963	0.320496	0.318766	0.315979	0.314705	0.321598	0.319385	0.321348	0.32267	0.316874	0.3141	0.323867	0.320778	0.322105	0.321114	0.320158	0.319017	0.321895	0.319633	0.319378	0.318768	0.319492	0.3171	0.322454	0.321167	0.322663	0.318027	0.3212	0.318599	0.322218	0.321257	0.32245	0.320018	0.322601	0.318152	0.319668	0.315276	0.323216
263	SMU132-B	1423494	0.319634	0.319939	0.320004	0.319693	0.321346	0.320508	0.324215	0.320903	0.317607	0.315237	0.321385	0.320141	0.315643	0.314616	0.32224	0.32049	0.321225	0.322861	0.317389	0.315229	0.322076	0.319639	0.32307	0.322306	0.319689	0.318757	0.321014	0.319154	0.320322	0.320077	0.320265	0.318446	0.322435	0.321325	0.322327	0.318713	0.320709	0.318506	0.323046	0.322328	0.321782	0.319901	0.323518	0.319946	0.319417	0.315809	0.322085
264	SMU132-T	1425521	0.318852	0.318961	0.319215	0.318597	0.32049	0.319453	0.3235	0.320027	0.316862	0.3142	0.320481	0.318994	0.314785	0.313579	0.321383	0.319381	0.320394	0.321934	0.316504	0.313942	0.321288	0.318531	0.3223	0.321322	0.318588	0.317554	0.320282	0.318189	0.319492	0.319094	0.319385	0.317212	0.32164	0.320338	0.321583	0.317381	0.319926	0.317327	0.322338	0.321417	0.321016	0.318845	0.322822	0.318787	0.318657	0.31454	0.321286
265	SMU141-B	1420152	0.321468	0.321707	0.321885	0.321414	0.322259	0.321461	0.32624	0.323322	0.319831	0.317732	0.322956	0.321808	0.317526	0.316708	0.323781	0.322106	0.323327	0.324798	0.319485	0.317618	0.324043	0.321867	0.324463	0.323963	0.322525	0.321727	0.322769	0.321182	0.322602	0.322499	0.321043	0.319442	0.324677	0.323813	0.324716	0.321422	0.32403	0.32207	0.323728	0.323224	0.323259	0.321578	0.3249	0.321695	0.320972	0.317583	0.325182
266	SMU141-T	1428499	0.319633	0.319226	0.320202	0.319124	0.320294	0.319089	0.324631	0.320996	0.318172	0.315259	0.320804	0.319126	0.315283	0.313953	0.321858	0.319633	0.32147	0.322729	0.317409	0.314713	0.322259	0.319213	0.322543	0.32157	0.320108	0.31902	0.321021	0.318737	0.320649	0.320084	0.319029	0.316693	0.322873	0.321545	0.322955	0.318394	0.322202	0.319377	0.321767	0.320875	0.321354	0.318967	0.323392	0.318994	0.319122	0.314859	0.32322
267	SMU142-B	1420991	0.31516	0.31533	0.31543	0.315041	0.317114	0.316359	0.319589	0.316559	0.314483	0.312219	0.316101	0.314958	0.311895	0.310976	0.316781	0.315163	0.316977	0.318491	0.312842	0.311061	0.318378	0.316042	0.318194	0.317581	0.314631	0.313713	0.316973	0.3153	0.314452	0.314142	0.315077	0.313426	0.317854	0.316964	0.317588	0.314276	0.316144	0.314173	0.317211	0.316567	0.317143	0.315451	0.318196	0.314894	0.313401	0.310059	0.318013
268	SMU142-T	1427890	0.31348	0.313073	0.313832	0.312866	0.315247	0.314126	0.318201	0.314516	0.312936	0.309971	0.314105	0.312454	0.309914	0.308566	0.314963	0.312869	0.315221	0.316528	0.311106	0.308539	0.316727	0.313665	0.316498	0.315449	0.312341	0.311236	0.315301	0.313039	0.312682	0.311978	0.313257	0.310888	0.316208	0.314857	0.316085	0.311589	0.314604	0.31171	0.315541	0.31451	0.315399	0.313118	0.316757	0.312437	0.311645	0.307539	0.31627
269	SMU157-B	1418158	0.322541	0.323035	0.32278	0.322633	0.32376	0.323074	0.32549	0.322594	0.320948	0.318849	0.323421	0.322371	0.318766	0.317858	0.324631	0.323091	0.322982	0.32462	0.319378	0.317661	0.324226	0.32217	0.323958	0.323458	0.322476	0.321556	0.323701	0.322199	0.32246	0.32245	0.321749	0.320265	0.323503	0.322738	0.324378	0.321248	0.323502	0.319837	0.32461	0.324147	0.322563	0.320968	0.32395	0.320874	0.321502	0.318219	0.324933
270	SMU157-T	1427223	0.320347	0.320278	0.320826	0.319984	0.321391	0.320283	0.323659	0.320001	0.318873	0.315991	0.320943	0.319332	0.316265	0.314919	0.322459	0.320342	0.320777	0.322219	0.317074	0.314513	0.322205	0.319243	0.321703	0.320774	0.319713	0.318579	0.321746	0.319524	0.320183	0.319699	0.319492	0.317177	0.321437	0.320084	0.322374	0.317989	0.321508	0.316825	0.322388	0.321499	0.320443	0.318113	0.322126	0.317907	0.319448	0.315271	0.322582
271	SMU159-B	1421845	0.31526	0.315496	0.315645	0.3152	0.316922	0.316113	0.319216	0.316204	0.313793	0.311662	0.314752	0.313631	0.313026	0.312083	0.316818	0.315202	0.316259	0.317885	0.313409	0.311506	0.317002	0.314734	0.316207	0.315614	0.316133	0.315263	0.315412	0.313761	0.3152	0.315068	0.315347	0.313766	0.316205	0.315287	0.317296	0.313914	0.31752	0.31378	0.317435	0.316901	0.316411	0.314624	0.317971	0.314644	0.3137	0.310404	0.318972
272	SMU159-T	1426757	0.313902	0.313801	0.314379	0.313519	0.31541	0.314371	0.31811	0.314593	0.312535	0.309852	0.313202	0.311729	0.311464	0.310239	0.315433	0.313484	0.314958	0.31644	0.312054	0.309581	0.315743	0.312933	0.314852	0.313971	0.314328	0.313347	0.314193	0.312111	0.313748	0.313303	0.313922	0.311854	0.314875	0.313654	0.316075	0.311857	0.316245	0.311944	0.316061	0.315245	0.315063	0.312825	0.316883	0.312834	0.312339	0.308482	0.317549
273	SMU161-B	1421098	0.321671	0.321917	0.322138	0.321687	0.322976	0.322227	0.324905	0.321899	0.320184	0.318014	0.323123	0.321951	0.318175	0.317306	0.323807	0.322206	0.322196	0.323901	0.319421	0.317487	0.324244	0.321897	0.324026	0.323457	0.32296	0.322058	0.322484	0.320811	0.321901	0.321697	0.321772	0.32012	0.32411	0.323181	0.3243	0.320975	0.323952	0.320957	0.323591	0.323028	0.322996	0.321237	0.324484	0.321153	0.320633	0.317179	0.324544
274	SMU161-T	1427251	0.320543	0.320324	0.321061	0.320087	0.321531	0.320506	0.323923	0.320453	0.319123	0.316401	0.321687	0.320153	0.316678	0.315495	0.32257	0.320597	0.320943	0.322409	0.318161	0.315722	0.32311	0.320172	0.322787	0.321894	0.321324	0.320262	0.321317	0.319201	0.320633	0.320027	0.320536	0.318379	0.322908	0.321635	0.323251	0.318988	0.322811	0.319182	0.322389	0.321533	0.321786	0.319546	0.323447	0.319316	0.319459	0.315424	0.323267
275	SMU167-B	1423217	0.320468	0.32054	0.320887	0.320269	0.321059	0.320262	0.325111	0.321796	0.318801	0.316518	0.320481	0.319247	0.316847	0.315893	0.322318	0.320581	0.321432	0.323154	0.318151	0.316083	0.322649	0.320165	0.322579	0.321881	0.320825	0.319918	0.322463	0.320689	0.320159	0.319897	0.320864	0.319057	0.322687	0.321718	0.323496	0.319951	0.322035	0.319794	0.322586	0.321852	0.321786	0.31989	0.322003	0.318539	0.319196	0.31562	0.323003
276	SMU167-T	1428195	0.319305	0.318975	0.319846	0.318778	0.319763	0.318626	0.324136	0.32038	0.317762	0.314888	0.319136	0.317443	0.315517	0.314205	0.321125	0.318938	0.320394	0.321838	0.316965	0.314283	0.321527	0.318419	0.321393	0.320402	0.319253	0.318109	0.321436	0.319192	0.318967	0.318349	0.319587	0.317218	0.321567	0.32027	0.32246	0.317958	0.320922	0.318045	0.321374	0.320377	0.320521	0.318177	0.321055	0.316747	0.318093	0.313831	0.321782
277	SMU177-B	1416373	0.321873	0.322022	0.322201	0.321623	0.323474	0.32276	0.32719	0.324392	0.321026	0.319093	0.323312	0.322295	0.318885	0.318144	0.324411	0.322946	0.323688	0.325189	0.319911	0.318239	0.325842	0.323723	0.32488	0.324478	0.32357	0.322729	0.323721	0.322262	0.322394	0.322471	0.322683	0.321173	0.325272	0.324486	0.325972	0.322873	0.324106	0.32224	0.324703	0.324197	0.324949	0.323478	0.325697	0.322795	0.32186	0.318601	0.326174
278	SMU177-T	1425743	0.319973	0.319637	0.320394	0.319248	0.321307	0.320273	0.325618	0.322099	0.319324	0.316601	0.321037	0.319541	0.316629	0.315534	0.322417	0.320396	0.32165	0.323008	0.317842	0.315461	0.323896	0.321079	0.322952	0.322161	0.321014	0.319925	0.321765	0.31975	0.320356	0.320004	0.320573	0.31837	0.323408	0.32215	0.324099	0.319902	0.322291	0.319612	0.322691	0.321798	0.323	0.32091	0.323992	0.320061	0.319972	0.315907	0.324135
279	SMU183-B	1418572	0.32335	0.323488	0.323677	0.323241	0.323535	0.322797	0.326183	0.323256	0.321378	0.319356	0.323194	0.322087	0.319751	0.318913	0.323829	0.322411	0.324312	0.326051	0.32029	0.318488	0.326192	0.324024	0.325028	0.324642	0.323013	0.322194	0.323781	0.322189	0.323002	0.322839	0.323272	0.321655	0.32455	0.323667	0.325817	0.322688	0.324095	0.321788	0.324924	0.324374	0.324418	0.322748	0.325151	0.321985	0.321482	0.318206	0.325531
280	SMU183-T	1426887	0.321275	0.32099	0.321766	0.320732	0.321394	0.320313	0.324611	0.321025	0.319621	0.316842	0.321044	0.319464	0.317489	0.316245	0.321865	0.319946	0.322355	0.323948	0.318258	0.315763	0.324329	0.321455	0.323157	0.322363	0.32045	0.319477	0.322061	0.319895	0.320975	0.320475	0.321167	0.318947	0.322626	0.321246	0.323971	0.319792	0.322294	0.319198	0.322943	0.321987	0.322491	0.320167	0.32354	0.319401	0.319617	0.315597	0.323574
281	SMU195-B	1416242	0.319859	0.32009	0.31999	0.31976	0.320596	0.319967	0.324487	0.321664	0.318517	0.316483	0.321455	0.320329	0.317018	0.316228	0.32257	0.321164	0.321611	0.323374	0.318258	0.316578	0.323573	0.321432	0.323066	0.322649	0.32132	0.32053	0.322205	0.32077	0.320456	0.320369	0.320883	0.3194	0.322618	0.321824	0.32343	0.320387	0.322129	0.319622	0.321945	0.321493	0.321798	0.320225	0.323249	0.320254	0.319936	0.31675	0.322133
282	SMU195-T	1429321	0.317745	0.317201	0.318211	0.317052	0.318279	0.3171	0.322983	0.319241	0.316674	0.313704	0.319021	0.317242	0.314534	0.313209	0.320568	0.318469	0.319609	0.321064	0.316094	0.313359	0.321595	0.31847	0.320978	0.319977	0.318576	0.317477	0.320318	0.318045	0.318176	0.317412	0.318686	0.316274	0.32081	0.319336	0.321597	0.316933	0.320193	0.316627	0.319721	0.318783	0.319847	0.317346	0.321571	0.317079	0.317979	0.313754	0.319967
283	SMU196-B	1423142	0.320882	0.320843	0.32129	0.320633	0.321795	0.320931	0.32477	0.321483	0.319889	0.317496	0.321582	0.3203	0.317421	0.316447	0.322233	0.320463	0.322379	0.324007	0.318452	0.316332	0.323298	0.320776	0.323249	0.322601	0.321886	0.32094	0.322391	0.320595	0.320646	0.320437	0.320139	0.318293	0.322515	0.32144	0.324267	0.320666	0.322477	0.319858	0.323144	0.322561	0.322545	0.320603	0.322714	0.319152	0.319537	0.315831	0.323669
284	SMU196-T	1426513	0.319569	0.319142	0.320045	0.31902	0.320359	0.31926	0.323612	0.319929	0.318618	0.315767	0.320074	0.318447	0.315924	0.314646	0.320886	0.318776	0.321039	0.322621	0.317139	0.314426	0.322076	0.319096	0.321945	0.321045	0.320144	0.319048	0.321177	0.319017	0.319231	0.318768	0.318751	0.316456	0.321152	0.319801	0.323065	0.31866	0.321281	0.318087	0.321788	0.320905	0.321257	0.318863	0.321563	0.317243	0.318204	0.314046	0.322296
285	SMU200-B	1423212	0.319971	0.320082	0.320313	0.319686	0.322863	0.322005	0.325144	0.322025	0.318848	0.316459	0.321562	0.320332	0.316447	0.315551	0.323063	0.32144	0.32156	0.323242	0.318319	0.316282	0.32288	0.320388	0.322825	0.322167	0.32227	0.321389	0.320997	0.319332	0.320554	0.320294	0.319866	0.318043	0.323177	0.322164	0.322761	0.319213	0.322396	0.318852	0.322084	0.32144	0.321982	0.32017	0.32423	0.320877	0.32055	0.316927	0.323743
286	SMU200-T	1424230	0.318769	0.318751	0.31911	0.318366	0.321686	0.320689	0.324173	0.320831	0.317706	0.315058	0.320315	0.318936	0.315274	0.314178	0.321914	0.32008	0.320344	0.321956	0.317154	0.314716	0.321674	0.318945	0.321644	0.320859	0.320932	0.31992	0.319916	0.318082	0.319328	0.318931	0.318625	0.316561	0.322037	0.320876	0.321642	0.31768	0.321278	0.317485	0.320948	0.320134	0.320949	0.318937	0.323148	0.319355	0.319461	0.315432	0.322615
287	TSH001-B	1423210	0.321048	0.321334	0.321498	0.321101	0.321169	0.320342	0.325072	0.321842	0.319096	0.316839	0.321688	0.320382	0.316662	0.315762	0.322698	0.320961	0.322553	0.324438	0.318826	0.316842	0.323887	0.32142	0.323694	0.323088	0.321952	0.321043	0.323508	0.321774	0.320562	0.320268	0.320789	0.319018	0.324031	0.322942	0.323634	0.320142	0.322991	0.320698	0.322405	0.321818	0.32191	0.320037	0.323838	0.320273	0.320036	0.316455	0.324585
288	TSH001-T	1426973	0.319905	0.319821	0.320447	0.319625	0.319957	0.318882	0.324109	0.320517	0.318011	0.315338	0.320368	0.318787	0.315389	0.314195	0.321562	0.319508	0.321436	0.323162	0.317591	0.315179	0.322746	0.31983	0.322504	0.321664	0.32052	0.319458	0.322381	0.320304	0.31934	0.318793	0.319538	0.317311	0.322868	0.321545	0.322638	0.318439	0.321901	0.319152	0.321248	0.320428	0.320778	0.318491	0.322862	0.318653	0.318935	0.314871	0.323449
289	TSH003-B	1417134	0.3221	0.322494	0.322374	0.322168	0.323371	0.322647	0.326426	0.323528	0.322014	0.320041	0.324113	0.323125	0.318853	0.318049	0.325051	0.323629	0.323847	0.325551	0.320162	0.318496	0.325829	0.323833	0.325425	0.324995	0.322563	0.32175	0.323103	0.32164	0.323634	0.323516	0.32287	0.321408	0.32491	0.324055	0.325831	0.32282	0.323673	0.322254	0.324184	0.323611	0.323409	0.321805	0.325062	0.322116	0.322129	0.318915	0.325062
290	TSH003-T	1426444	0.320207	0.320112	0.320762	0.319946	0.321237	0.320177	0.324896	0.321287	0.320249	0.317575	0.321917	0.320518	0.316688	0.315515	0.323193	0.321287	0.322074	0.323579	0.31822	0.315797	0.32402	0.321335	0.323444	0.322557	0.320324	0.319197	0.321423	0.319364	0.32165	0.32113	0.32085	0.318775	0.323131	0.321898	0.324055	0.320038	0.321858	0.319738	0.32222	0.321373	0.321589	0.319386	0.323503	0.319517	0.320373	0.316407	0.323004
291	TSH005-B	1420107	0.322379	0.322628	0.322648	0.322312	0.324747	0.324037	0.327432	0.324379	0.321071	0.318962	0.323415	0.322274	0.31934	0.318471	0.325129	0.323603	0.325018	0.326752	0.321112	0.319338	0.326315	0.324066	0.325737	0.325202	0.324038	0.323321	0.325629	0.324078	0.323563	0.323407	0.323499	0.321963	0.325773	0.324882	0.326131	0.322889	0.324297	0.321828	0.32591	0.32531	0.324816	0.323157	0.326298	0.323068	0.322031	0.318748	0.325796
292	TSH005-T	1424931	0.321546	0.321464	0.321882	0.321133	0.323772	0.322819	0.32669	0.323324	0.320254	0.317708	0.322319	0.320919	0.318254	0.317147	0.324213	0.322359	0.324176	0.325529	0.320192	0.317941	0.3255	0.322768	0.324859	0.324053	0.322851	0.32193	0.324923	0.322924	0.322646	0.322163	0.322524	0.320625	0.324935	0.323743	0.325423	0.321538	0.323478	0.320454	0.324973	0.324151	0.32402	0.32202	0.325424	0.321608	0.321251	0.317437	0.324807
293	TSH008-B	1423496	0.319716	0.319779	0.320106	0.319527	0.32177	0.320864	0.32428	0.32102	0.318997	0.316476	0.320513	0.319244	0.315928	0.314957	0.322552	0.320792	0.322094	0.323876	0.318554	0.31649	0.323152	0.320593	0.322821	0.322192	0.321194	0.320259	0.322593	0.320785	0.32132	0.320977	0.31991	0.318084	0.323288	0.32222	0.323091	0.319565	0.322315	0.318269	0.322414	0.321765	0.321466	0.319532	0.322094	0.318473	0.320004	0.316447	0.323919
294	TSH008-T	1428363	0.318732	0.318396	0.319242	0.31822	0.320554	0.319385	0.323497	0.319765	0.318056	0.315088	0.31932	0.317656	0.314713	0.313433	0.321593	0.3194	0.321101	0.322738	0.317547	0.314834	0.322288	0.319169	0.321761	0.32079	0.319831	0.318725	0.321654	0.319418	0.3203	0.319621	0.318848	0.316509	0.322359	0.320943	0.322155	0.317724	0.321404	0.316803	0.321394	0.320468	0.320517	0.318113	0.321292	0.316831	0.319039	0.314915	0.322798
295	TSH012-B	1419557	0.321291	0.321708	0.321698	0.32142	0.323763	0.323037	0.326329	0.323351	0.321034	0.319042	0.322674	0.321593	0.318872	0.31798	0.324859	0.323316	0.324144	0.325699	0.320302	0.318493	0.324356	0.322197	0.324482	0.32401	0.322205	0.321311	0.32314	0.321632	0.322651	0.32244	0.321389	0.319848	0.324364	0.323533	0.324855	0.321707	0.323369	0.320928	0.323812	0.323313	0.3234	0.32178	0.323776	0.320788	0.322431	0.31916	0.325101
296	TSH012-T	1426807	0.319436	0.319372	0.319951	0.319111	0.321682	0.320652	0.324726	0.321123	0.319288	0.316582	0.320522	0.31903	0.316599	0.315392	0.322907	0.320893	0.322162	0.323518	0.318298	0.315895	0.32255	0.319684	0.322498	0.321674	0.319736	0.318658	0.321327	0.31929	0.320646	0.320114	0.319342	0.317212	0.3226	0.321332	0.323091	0.318902	0.321521	0.318391	0.321952	0.321073	0.321528	0.319351	0.322196	0.318212	0.320667	0.316644	0.323119
297	TSH013-B	1419451	0.321261	0.321746	0.321583	0.321406	0.323783	0.323013	0.326693	0.323777	0.320909	0.31887	0.323234	0.322167	0.319119	0.318335	0.325104	0.323617	0.32344	0.324932	0.319842	0.31816	0.325443	0.323318	0.324633	0.324055	0.323555	0.322715	0.323544	0.321944	0.322514	0.322299	0.322043	0.320434	0.325286	0.324276	0.325343	0.322105	0.323337	0.32104	0.325064	0.324545	0.323761	0.322067	0.324766	0.321489	0.321354	0.318016	0.324675
298	TSH013-T	1427304	0.317336	0.317099	0.317843	0.31686	0.319719	0.318596	0.322121	0.318424	0.317484	0.314642	0.317819	0.316276	0.313974	0.312686	0.319621	0.317575	0.319859	0.321289	0.315596	0.313001	0.32139	0.318331	0.320539	0.319622	0.316679	0.315617	0.319777	0.317509	0.317414	0.316921	0.317384	0.315076	0.320425	0.319078	0.320963	0.316582	0.319738	0.316903	0.319355	0.318422	0.320437	0.318104	0.320893	0.316569	0.317128	0.312993	0.320936
299	UP2003-B	1418249	0.310263	0.310538	0.310938	0.310678	0.314816	0.314046	0.313735	0.310839	0.309104	0.306964	0.311602	0.310518	0.306782	0.305998	0.310671	0.30912	0.311445	0.313388	0.307382	0.305526	0.312301	0.310136	0.31192	0.311322	0.309961	0.309166	0.310804	0.309173	0.310279	0.31021	0.309676	0.307967	0.311094	0.310191	0.311865	0.308714	0.309597	0.309052	0.311217	0.310707	0.311194	0.309532	0.311876	0.308648	0.309581	0.306565	0.311321
300	UP2003-T	1423595	0.30981	0.309623	0.310716	0.309919	0.31413	0.313094	0.313311	0.309933	0.30876	0.306152	0.310973	0.309588	0.306229	0.305166	0.310169	0.308237	0.311035	0.312676	0.30687	0.304484	0.31192	0.309198	0.311275	0.310206	0.309164	0.308189	0.310429	0.308334	0.30955	0.309027	0.309181	0.306994	0.310731	0.309479	0.311365	0.307536	0.309128	0.308127	0.310522	0.309891	0.310775	0.308662	0.311597	0.307671	0.309225	0.305688	0.310565
301	UP2004-B	1422133	0.321734	0.32187	0.322167	0.321728	0.322271	0.321547	0.32605	0.322833	0.319365	0.317091	0.321616	0.320495	0.317988	0.317057	0.323454	0.321887	0.321333	0.322867	0.31957	0.317605	0.323843	0.32153	0.323466	0.322918	0.321684	0.320796	0.323264	0.32149	0.322484	0.322343	0.321608	0.319903	0.323963	0.322987	0.324748	0.321414	0.322839	0.320596	0.324133	0.323479	0.321294	0.319597	0.32384	0.320377	0.319997	0.316616	0.322955
302	UP2004-T	1427929	0.320378	0.320032	0.320971	0.320001	0.320792	0.319749	0.325007	0.321221	0.318115	0.315302	0.32007	0.318473	0.316374	0.315135	0.322151	0.320151	0.319966	0.321393	0.318173	0.315599	0.322592	0.319677	0.322042	0.321108	0.319958	0.318885	0.322062	0.319784	0.321107	0.320582	0.320191	0.317905	0.322632	0.321302	0.323548	0.319239	0.321589	0.318696	0.322783	0.321874	0.320004	0.317727	0.322718	0.318378	0.318734	0.314765	0.321547
303	UP2035-B	1421784	0.322576	0.322873	0.322887	0.322528	0.324829	0.324114	0.327061	0.323928	0.321796	0.319608	0.324196	0.323033	0.318758	0.317858	0.325124	0.323526	0.32431	0.325921	0.321663	0.319849	0.326138	0.323845	0.326451	0.325838	0.323628	0.322822	0.324627	0.322975	0.322248	0.321962	0.323148	0.321502	0.326478	0.325633	0.325178	0.321841	0.324675	0.322995	0.325997	0.325403	0.324763	0.323024	0.326415	0.32312	0.322639	0.319326	0.325769
304	UP2035-T	1426747	0.321244	0.321074	0.321625	0.32079	0.323343	0.322277	0.325948	0.32227	0.320493	0.317771	0.322621	0.321002	0.317111	0.315907	0.323749	0.321682	0.322872	0.324401	0.320235	0.317806	0.324823	0.321835	0.324994	0.324049	0.321757	0.320833	0.323266	0.321123	0.320724	0.320077	0.321652	0.319433	0.325098	0.323854	0.323866	0.319611	0.323414	0.320999	0.324512	0.323578	0.32345	0.321162	0.325277	0.321065	0.321322	0.317365	0.324256
305	UP2037-B	1423981	0.319812	0.319998	0.320268	0.319666	0.32128	0.320431	0.324496	0.32127	0.319086	0.316605	0.320116	0.318863	0.316548	0.315534	0.321835	0.320064	0.322298	0.323777	0.317297	0.315269	0.32347	0.320978	0.322057	0.321362	0.320987	0.320051	0.321931	0.320101	0.320119	0.319832	0.319961	0.31812	0.323013	0.321989	0.324241	0.320553	0.32188	0.319384	0.322083	0.321206	0.322964	0.321044	0.32226	0.318688	0.319329	0.315803	0.323323
306	UP2037-T	1427485	0.318786	0.31866	0.319335	0.318419	0.320247	0.319156	0.323658	0.320082	0.318151	0.315313	0.318939	0.317369	0.315368	0.314125	0.320814	0.318684	0.32125	0.322626	0.316274	0.313771	0.322497	0.31957	0.321018	0.32013	0.319654	0.318609	0.320985	0.318792	0.319015	0.318521	0.318809	0.316554	0.322047	0.320733	0.323224	0.318919	0.32088	0.31799	0.320992	0.319975	0.321923	0.319588	0.321374	0.317195	0.318354	0.314361	0.322188
307	UP2039-B	1418191	0.322368	0.322852	0.323198	0.322959	0.324029	0.323244	0.327042	0.324178	0.321803	0.319722	0.323611	0.322553	0.320085	0.319201	0.323763	0.322274	0.323989	0.325835	0.320507	0.318689	0.325647	0.323455	0.325284	0.324789	0.323769	0.322892	0.323756	0.322192	0.323302	0.323196	0.323942	0.322339	0.32478	0.323884	0.326023	0.322818	0.323892	0.322102	0.325458	0.324882	0.325102	0.323349	0.325498	0.32232	0.321701	0.318369	0.324752
308	UP2039-T	1425392	0.321722	0.321657	0.322574	0.321807	0.323123	0.32206	0.326595	0.323064	0.321144	0.318561	0.322636	0.321255	0.318902	0.317766	0.323126	0.32119	0.323175	0.324682	0.319802	0.317505	0.324895	0.322174	0.324583	0.32369	0.322739	0.321753	0.323045	0.321086	0.322352	0.321964	0.32301	0.321017	0.324169	0.322765	0.325476	0.321551	0.323197	0.321018	0.32459	0.323678	0.324278	0.32215	0.32494	0.320976	0.320873	0.31707	0.323903
309	UP2041-B	1422848	0.258269	0.258416	0.259032	0.258621	0.281718	0.280886	0.258052	0.254621	0.26016	0.257791	0.255593	0.254317	0.257237	0.256216	0.255903	0.254315	0.25383	0.256056	0.254851	0.252675	0.255426	0.252925	0.255226	0.254583	0.252694	0.251931	0.254524	0.252547	0.254623	0.254383	0.254839	0.253037	0.253964	0.252859	0.254018	0.250488	0.254269	0.251842	0.255261	0.254508	0.255961	0.253806	0.255319	0.251418	0.258642	0.256415	0.255999
310	UP2041-T	1426210	0.257209	0.257042	0.258002	0.257224	0.280509	0.279453	0.257152	0.253403	0.25915	0.256329	0.254436	0.252852	0.256011	0.254726	0.254858	0.252938	0.252706	0.254896	0.253725	0.25108	0.25438	0.251452	0.254095	0.253289	0.251147	0.250248	0.253417	0.25112	0.253432	0.252946	0.253677	0.25145	0.252881	0.251486	0.253017	0.248788	0.253269	0.25037	0.254228	0.253233	0.254945	0.252433	0.254407	0.249912	0.25757	0.254819	0.254934
311	UP2048-B	1422228	0.321169	0.321503	0.321481	0.321154	0.322442	0.321622	0.326505	0.32342	0.319415	0.317108	0.321165	0.319971	0.316989	0.31606	0.322887	0.321238	0.322737	0.324366	0.319313	0.31741	0.325015	0.322594	0.323891	0.323181	0.322639	0.321769	0.322217	0.320441	0.322217	0.32216	0.320584	0.318855	0.322747	0.321773	0.324028	0.320627	0.323837	0.320741	0.3241	0.323355	0.323872	0.322007	0.324382	0.320935	0.32029	0.316721	0.325585
312	UP2048-T	1427052	0.319958	0.319876	0.320428	0.319599	0.321054	0.319956	0.325533	0.321899	0.318332	0.315539	0.319642	0.318109	0.315548	0.314309	0.321714	0.319598	0.3215	0.322956	0.318075	0.315586	0.323858	0.320873	0.322652	0.321646	0.321056	0.320013	0.32102	0.318831	0.320886	0.320518	0.319313	0.317059	0.321602	0.320262	0.322926	0.318677	0.322687	0.31898	0.322899	0.321908	0.322675	0.320372	0.32335	0.319155	0.319086	0.315025	0.324324
313	UP2049-B	1421957	0.320022	0.320306	0.320583	0.320085	0.321731	0.32097	0.325204	0.321989	0.319083	0.316741	0.321398	0.320158	0.316516	0.315632	0.321725	0.320058	0.321063	0.322562	0.316701	0.314748	0.323646	0.321211	0.322723	0.322077	0.320606	0.319713	0.321833	0.32013	0.319944	0.319813	0.320364	0.318566	0.322771	0.321675	0.324237	0.32077	0.322413	0.319343	0.32297	0.322384	0.322739	0.320817	0.323035	0.319667	0.319824	0.316309	0.324127
314	UP2049-T	1426333	0.318635	0.318475	0.319213	0.318283	0.320286	0.319253	0.32409	0.320404	0.31784	0.314961	0.319849	0.318206	0.31493	0.313696	0.32024	0.318198	0.319569	0.321048	0.3153	0.312754	0.322316	0.319367	0.321356	0.320406	0.31874	0.317676	0.32055	0.318413	0.318481	0.318026	0.318807	0.316509	0.321372	0.319953	0.323022	0.31863	0.32111	0.317408	0.321584	0.320623	0.321396	0.318967	0.321848	0.317626	0.318419	0.314295	0.322713
315	UP2050-B	1415287	0.324594	0.325077	0.324505	0.324522	0.324893	0.324252	0.327182	0.324535	0.322116	0.320232	0.32407	0.32305	0.320164	0.319304	0.325649	0.324353	0.324469	0.326013	0.321713	0.320034	0.326133	0.324182	0.325526	0.325062	0.324059	0.323319	0.325106	0.323686	0.323589	0.323503	0.323087	0.321568	0.326247	0.325577	0.325423	0.322517	0.324502	0.322722	0.325568	0.324996	0.325936	0.324365	0.326595	0.323812	0.32253	0.31937	0.325925
316	UP2050-T	1424507	0.324285	0.324333	0.324413	0.323786	0.324347	0.323484	0.327146	0.323966	0.322042	0.31961	0.323615	0.322299	0.319759	0.318726	0.325354	0.323604	0.324341	0.32519	0.321325	0.319208	0.325873	0.323306	0.325196	0.324396	0.323331	0.322354	0.324862	0.322991	0.323177	0.322835	0.322461	0.320578	0.325873	0.32484	0.325153	0.321506	0.324239	0.322012	0.325188	0.324333	0.325643	0.323762	0.326491	0.322969	0.322212	0.318489	0.325616
317	UP2063-B	1422187	0.32099	0.321353	0.321464	0.321182	0.322658	0.321847	0.326573	0.323454	0.319923	0.317699	0.32203	0.320842	0.317815	0.316919	0.324353	0.322782	0.32306	0.324554	0.318528	0.316533	0.32475	0.322376	0.323818	0.323285	0.321804	0.320933	0.323115	0.321452	0.322189	0.321936	0.322412	0.320753	0.324793	0.323815	0.323191	0.319826	0.323345	0.3203	0.323468	0.322881	0.322744	0.321017	0.325111	0.321742	0.321264	0.317928	0.324809
318	UP2063-T	1425468	0.319741	0.319875	0.320274	0.319666	0.321323	0.320286	0.32555	0.32204	0.318818	0.316163	0.320679	0.319238	0.316412	0.315236	0.323101	0.321223	0.32184	0.323287	0.317319	0.314917	0.323572	0.320744	0.322525	0.321781	0.32019	0.31924	0.321924	0.319944	0.320943	0.320464	0.321116	0.319064	0.323581	0.32232	0.322125	0.31809	0.322158	0.318608	0.32219	0.321391	0.321605	0.319469	0.324014	0.319992	0.320006	0.316267	0.323571
319	UP2089-B	1414188	0.322104	0.322623	0.322335	0.322242	0.322181	0.321512	0.326496	0.32374	0.320041	0.318093	0.32356	0.322594	0.319513	0.318724	0.324739	0.323294	0.323008	0.324721	0.319324	0.317696	0.324379	0.322355	0.324187	0.323691	0.322446	0.321598	0.324253	0.32285	0.321693	0.321663	0.320365	0.318823	0.323623	0.322924	0.324709	0.321735	0.324284	0.320777	0.324713	0.32411	0.32393	0.322435	0.324354	0.321594	0.320396	0.317163	0.325718
320	UP2089-T	1424755	0.32575	0.325144	0.326112	0.324868	0.325542	0.324643	0.330439	0.327045	0.323942	0.321366	0.327072	0.32569	0.322792	0.321761	0.328374	0.326567	0.326608	0.32748	0.323085	0.320932	0.328169	0.325542	0.327853	0.327082	0.325581	0.324605	0.328021	0.32595	0.325364	0.32451	0.324804	0.322773	0.327202	0.325879	0.328473	0.324645	0.32808	0.324008	0.328144	0.327227	0.327389	0.325345	0.328227	0.324581	0.32414	0.320363	0.32912
321	UP2092-B	1420159	0.320484	0.320902	0.320668	0.320609	0.321993	0.321268	0.324946	0.322065	0.318695	0.316738	0.3205	0.31934	0.316882	0.316047	0.322359	0.320784	0.322281	0.324003	0.318723	0.316872	0.323745	0.321502	0.322561	0.322035	0.321153	0.320437	0.321447	0.319871	0.321753	0.321624	0.320963	0.31934	0.323877	0.322989	0.324254	0.32054	0.322187	0.319366	0.322716	0.322137	0.321806	0.320136	0.323153	0.319929	0.319825	0.316564	0.323892
322	UP2092-T	1425397	0.31856	0.318657	0.318948	0.318371	0.32	0.318979	0.323366	0.319948	0.316871	0.314312	0.31839	0.316839	0.314814	0.313643	0.320433	0.318443	0.32041	0.322005	0.316865	0.314413	0.321921	0.319108	0.320647	0.319813	0.318875	0.31793	0.319706	0.31767	0.31985	0.319364	0.319037	0.316895	0.3221	0.320819	0.322375	0.31786	0.320408	0.316959	0.32085	0.320004	0.320011	0.317823	0.321479	0.31741	0.317987	0.314144	0.322026
323	UP2093-B	1419250	0.322254	0.322591	0.322578	0.322244	0.324126	0.323484	0.325791	0.322846	0.321153	0.319062	0.322168	0.321024	0.319191	0.318336	0.324251	0.322736	0.324878	0.326517	0.319949	0.318132	0.325132	0.322978	0.32445	0.323856	0.323401	0.322561	0.323128	0.321619	0.322504	0.322458	0.322196	0.320604	0.323814	0.322874	0.324184	0.320708	0.323115	0.321216	0.324134	0.323573	0.324017	0.322348	0.325362	0.32227	0.320869	0.317517	0.324169
324	UP2093-T	1425404	0.321854	0.321786	0.322289	0.321466	0.323475	0.322518	0.325658	0.322228	0.320929	0.318149	0.322079	0.32054	0.318629	0.317435	0.323838	0.321915	0.324534	0.325898	0.319617	0.317253	0.324858	0.322094	0.323957	0.32304	0.322496	0.321566	0.322889	0.320894	0.322096	0.321723	0.321781	0.319728	0.32345	0.322123	0.324402	0.320143	0.322837	0.320364	0.323755	0.322847	0.323659	0.321469	0.325349	0.321411	0.32047	0.316594	0.32378
325	UP2099-B	1415404	0.323114	0.323483	0.323892	0.323555	0.324929	0.324237	0.326336	0.323607	0.321786	0.319808	0.324176	0.323177	0.319661	0.318809	0.325905	0.32447	0.324391	0.326072	0.320388	0.318651	0.325566	0.323503	0.32558	0.324946	0.323019	0.322124	0.324421	0.322885	0.323424	0.323374	0.323816	0.322304	0.326782	0.326053	0.32609	0.323046	0.325273	0.322889	0.325001	0.324693	0.323921	0.322237	0.326757	0.323735	0.321645	0.318471	0.326091
326	UP2099-T	1424961	0.322399	0.322096	0.323193	0.322239	0.323581	0.322588	0.32601	0.322463	0.32105	0.318317	0.323018	0.321527	0.318556	0.31738	0.324886	0.322944	0.323506	0.324699	0.319586	0.317265	0.32469	0.321904	0.32464	0.323602	0.321674	0.320645	0.323427	0.32133	0.322292	0.321903	0.322749	0.320676	0.325842	0.324442	0.325146	0.32115	0.324421	0.321415	0.32426	0.323314	0.322923	0.320704	0.326053	0.322089	0.320916	0.317081	0.325228
327	UP2100-B	1424386	0.321158	0.321053	0.321538	0.320718	0.322622	0.321771	0.323907	0.320511	0.318895	0.316398	0.321144	0.319846	0.317121	0.316155	0.322348	0.320546	0.322845	0.324489	0.318171	0.315954	0.324254	0.321744	0.324277	0.323531	0.321633	0.320588	0.32282	0.320964	0.321032	0.320637	0.319703	0.317867	0.322751	0.321661	0.324204	0.320432	0.322233	0.319446	0.322973	0.322231	0.321768	0.319823	0.323808	0.320149	0.320774	0.316971	0.324501
328	UP2100-T	1428378	0.31998	0.319477	0.320414	0.319163	0.321242	0.320088	0.322864	0.319046	0.317751	0.314769	0.319732	0.317976	0.315702	0.314439	0.32113	0.318928	0.321515	0.322996	0.316804	0.314085	0.323089	0.320011	0.323062	0.322011	0.319966	0.318799	0.321664	0.319424	0.319742	0.319051	0.318424	0.316028	0.32155	0.320113	0.323003	0.318345	0.321023	0.31771	0.321734	0.32072	0.320575	0.318181	0.322783	0.318403	0.319628	0.315236	0.323268
329	UP2101-B	1419256	0.32283	0.323088	0.323191	0.32267	0.322422	0.32164	0.325678	0.322798	0.320133	0.318002	0.321978	0.320848	0.317983	0.317103	0.323014	0.321381	0.323331	0.325032	0.31967	0.317924	0.324475	0.322249	0.323971	0.323456	0.3215	0.320689	0.322786	0.321139	0.321763	0.321632	0.321009	0.319353	0.322926	0.32203	0.324493	0.321235	0.323542	0.321081	0.323858	0.323296	0.322	0.320328	0.325345	0.322118	0.320188	0.316756	0.324881
330	UP2101-T	1425586	0.323158	0.322783	0.323555	0.32239	0.322447	0.321423	0.326134	0.322849	0.320367	0.317712	0.321976	0.320507	0.318099	0.31699	0.323248	0.321349	0.323503	0.324747	0.319861	0.317648	0.32472	0.321991	0.323952	0.323145	0.321405	0.320418	0.322915	0.320892	0.321944	0.321512	0.321018	0.318967	0.323116	0.321835	0.324687	0.320741	0.323731	0.320815	0.324094	0.323267	0.322104	0.320119	0.325688	0.321838	0.320535	0.316621	0.324877
331	UP2103-B	1416903	0.321517	0.321903	0.321816	0.321567	0.324013	0.323283	0.325802	0.322988	0.320308	0.318401	0.322215	0.321147	0.318153	0.317276	0.323658	0.322211	0.322957	0.324544	0.319239	0.317439	0.324874	0.322865	0.324426	0.323952	0.322735	0.321918	0.322934	0.321474	0.322304	0.322168	0.322053	0.320558	0.324192	0.323412	0.324425	0.321413	0.323155	0.32053	0.323691	0.323216	0.322589	0.32106	0.323856	0.32093	0.321482	0.318208	0.324144
332	UP2103-T	1425293	0.32122	0.321031	0.321562	0.320652	0.323257	0.322229	0.325744	0.322358	0.320015	0.317464	0.321548	0.32011	0.31752	0.316404	0.323268	0.321395	0.322552	0.323456	0.318781	0.316488	0.324524	0.321889	0.324025	0.323208	0.321875	0.320862	0.322552	0.320552	0.321731	0.321308	0.321444	0.319458	0.323904	0.322673	0.324037	0.320127	0.322879	0.319537	0.323312	0.322535	0.322097	0.320123	0.323678	0.319965	0.321004	0.31709	0.323711
333	UP2109-B	1422731	0.322487	0.322717	0.322842	0.322422	0.322332	0.32158	0.325389	0.322242	0.320696	0.318338	0.322376	0.321186	0.319334	0.318378	0.323398	0.321686	0.322708	0.324394	0.319567	0.317534	0.325158	0.322668	0.323215	0.322524	0.321797	0.320952	0.323379	0.321643	0.32156	0.32121	0.32188	0.320138	0.323739	0.322686	0.323573	0.32006	0.323057	0.321012	0.324318	0.323586	0.322686	0.320848	0.323942	0.320423	0.31996	0.316504	0.32374
334	UP2109-T	1426731	0.321515	0.321418	0.321995	0.321175	0.321254	0.320245	0.324556	0.320996	0.319877	0.317073	0.32129	0.319762	0.318197	0.316987	0.322447	0.320384	0.321734	0.32329	0.318545	0.316071	0.324196	0.321222	0.322224	0.321288	0.320502	0.319502	0.322543	0.320416	0.320562	0.319961	0.320903	0.318735	0.322847	0.321518	0.322684	0.318504	0.32214	0.319586	0.323341	0.322434	0.321686	0.31939	0.323133	0.318974	0.319011	0.315111	0.322722
335	UP2113-B	1423328	0.325597	0.325687	0.326388	0.325836	0.326092	0.325133	0.328365	0.325158	0.322915	0.320527	0.325867	0.324554	0.320554	0.319598	0.327026	0.325239	0.326056	0.327564	0.322262	0.320158	0.328319	0.325684	0.326739	0.325668	0.325784	0.324724	0.326697	0.324795	0.325418	0.324987	0.325753	0.323751	0.326751	0.325721	0.32805	0.324353	0.32635	0.324016	0.326239	0.325556	0.327056	0.325121	0.327098	0.323585	0.323959	0.320344	0.328158
336	UP2113-T	1426302	0.324123	0.324026	0.324886	0.324257	0.324614	0.323582	0.327232	0.323827	0.321498	0.318989	0.324473	0.323053	0.318982	0.317912	0.325608	0.323805	0.324486	0.326098	0.32086	0.318653	0.327007	0.324307	0.325396	0.324543	0.324245	0.32329	0.325108	0.323082	0.323853	0.323359	0.324333	0.322271	0.325423	0.324303	0.326661	0.322814	0.324905	0.322473	0.325011	0.324115	0.325515	0.323408	0.325729	0.321968	0.322502	0.318902	0.326853
337	UP2115-B	1420796	0.320695	0.321134	0.321003	0.320804	0.322286	0.3215	0.325908	0.322881	0.318985	0.316839	0.321688	0.320527	0.317366	0.316504	0.323304	0.321728	0.323076	0.324503	0.318541	0.316744	0.323152	0.320955	0.323713	0.323109	0.322038	0.321135	0.322128	0.320517	0.321436	0.321346	0.321436	0.319819	0.323148	0.32225	0.322926	0.319702	0.322217	0.319901	0.322839	0.322179	0.32325	0.321607	0.32317	0.320021	0.317652	0.313558	0.32369
338	UP2115-T	1429499	0.319229	0.318968	0.319778	0.318781	0.320427	0.31922	0.324814	0.32094	0.317748	0.314671	0.319947	0.318133	0.315545	0.314165	0.321894	0.319682	0.321594	0.322876	0.317124	0.314373	0.321886	0.318778	0.322273	0.321174	0.319811	0.318745	0.320823	0.318469	0.31989	0.319233	0.319854	0.317456	0.321752	0.320268	0.321671	0.316997	0.320983	0.317619	0.321392	0.320314	0.321722	0.319227	0.322087	0.31758	0.316939	0.312048	0.322076
339	UP2116-B	1416384	0.324123	0.324487	0.3248	0.324512	0.325452	0.324719	0.329052	0.326327	0.324727	0.322727	0.326238	0.325128	0.322694	0.321872	0.32782	0.326424	0.326304	0.328093	0.322029	0.320244	0.32785	0.325714	0.32688	0.326302	0.325947	0.325104	0.327075	0.325576	0.325624	0.325533	0.326048	0.324434	0.327408	0.326623	0.327822	0.324721	0.326934	0.323754	0.327273	0.326892	0.326228	0.324552	0.327536	0.324501	0.323473	0.320261	0.327748
340	UP2116-T	1425124	0.322529	0.322336	0.323433	0.322579	0.323787	0.322781	0.32803	0.324544	0.323405	0.320724	0.324435	0.322879	0.320821	0.31972	0.326259	0.324398	0.324741	0.326009	0.320373	0.31806	0.326397	0.323619	0.325205	0.324152	0.324059	0.32307	0.325646	0.323628	0.324091	0.32351	0.324363	0.322306	0.325997	0.324734	0.326562	0.322536	0.325471	0.32181	0.325702	0.324877	0.324713	0.322554	0.326283	0.322326	0.321966	0.318175	0.326129
341	UP2117-B	1420387	0.322321	0.322501	0.322549	0.322211	0.323549	0.322772	0.325849	0.322797	0.320002	0.317828	0.322894	0.321745	0.318098	0.317207	0.323803	0.322171	0.322073	0.323765	0.319111	0.317266	0.324865	0.322557	0.323735	0.323218	0.322987	0.322151	0.322286	0.320671	0.321631	0.321493	0.322823	0.321104	0.323884	0.322918	0.324541	0.321286	0.322694	0.319904	0.323796	0.323228	0.322808	0.321136	0.324284	0.32103	0.320306	0.316919	0.32435
342	UP2117-T	1427240	0.320686	0.320312	0.321067	0.320029	0.321792	0.320594	0.324508	0.320777	0.318497	0.315576	0.320989	0.319292	0.316125	0.314847	0.322131	0.319945	0.320448	0.322017	0.317407	0.314817	0.323311	0.320213	0.322113	0.321166	0.320665	0.319596	0.320722	0.318543	0.319957	0.319367	0.321095	0.318713	0.32228	0.320839	0.32306	0.318567	0.321217	0.317612	0.322122	0.321166	0.321239	0.318868	0.322942	0.318657	0.318699	0.31454	0.322622
343	UP2119-B	1419360	0.316366	0.316738	0.316743	0.316407	0.317008	0.316266	0.320421	0.3174	0.315919	0.31371	0.31827	0.317188	0.31261	0.31176	0.318245	0.316586	0.31828	0.320016	0.314808	0.312962	0.319206	0.317042	0.318098	0.317609	0.317585	0.316735	0.31801	0.316421	0.316853	0.316757	0.316621	0.314956	0.319581	0.318734	0.319634	0.316389	0.317202	0.315781	0.317921	0.317399	0.318037	0.316271	0.319446	0.316286	0.315782	0.31253	0.31907
344	UP2119-T	1426911	0.314515	0.314258	0.314977	0.313954	0.314904	0.313776	0.318842	0.31514	0.314259	0.311273	0.316048	0.314425	0.31043	0.309159	0.316379	0.314133	0.316361	0.31789	0.312897	0.310271	0.317425	0.314387	0.316156	0.315244	0.315107	0.31402	0.31623	0.314077	0.314879	0.314377	0.314605	0.312263	0.317802	0.316427	0.317811	0.313346	0.315402	0.313144	0.315975	0.314994	0.316113	0.31368	0.317958	0.313589	0.313921	0.309902	0.31719
345	UP2123-B	1422872	0.276468	0.276675	0.27711	0.276709	0.283116	0.282299	0.276047	0.272771	0.276927	0.274516	0.272649	0.271344	0.273294	0.272284	0.274347	0.272613	0.274373	0.27604	0.274077	0.271907	0.274966	0.272378	0.275887	0.275327	0.274456	0.273671	0.2766	0.274699	0.273557	0.273201	0.272124	0.270208	0.275485	0.274419	0.273793	0.270208	0.272089	0.272052	0.274572	0.27389	0.274362	0.272216	0.274061	0.270205	0.277062	0.274338	0.275206
346	UP2123-T	1427213	0.275307	0.275129	0.27602	0.27524	0.281855	0.280728	0.275121	0.27138	0.27587	0.272898	0.271324	0.26961	0.271939	0.270598	0.273158	0.271036	0.273121	0.274714	0.272892	0.270146	0.273842	0.270691	0.274743	0.27386	0.272902	0.271923	0.275604	0.273211	0.272329	0.271701	0.27089	0.268422	0.274382	0.272994	0.272678	0.268233	0.270999	0.270321	0.273461	0.272555	0.273286	0.27067	0.273037	0.26846	0.275944	0.272649	0.273916
347	UP2133-B	1414513	0.322834	0.323129	0.323578	0.323236	0.323658	0.322929	0.326408	0.323662	0.322112	0.319999	0.323441	0.322443	0.318987	0.318087	0.324488	0.323077	0.324077	0.325734	0.32061	0.318805	0.325689	0.32358	0.325488	0.324849	0.323431	0.322524	0.323976	0.322463	0.322732	0.32259	0.322771	0.321201	0.324991	0.324135	0.325786	0.322876	0.323816	0.321722	0.324221	0.323908	0.324071	0.322462	0.325362	0.322284	0.321694	0.318588	0.325345
348	UP2133-T	1424450	0.322012	0.3219	0.322914	0.322176	0.322761	0.321769	0.325839	0.322493	0.321292	0.31878	0.322521	0.321225	0.317995	0.316887	0.323564	0.321804	0.323223	0.324532	0.319742	0.317555	0.324862	0.322262	0.324511	0.323521	0.322287	0.321261	0.323336	0.321424	0.321938	0.321517	0.321731	0.319817	0.324193	0.322954	0.325096	0.321453	0.323035	0.3205	0.323301	0.322657	0.323202	0.321215	0.324669	0.321062	0.320922	0.317346	0.324635
349	UP2142-B	1418936	0.318774	0.319177	0.319062	0.318821	0.318699	0.31799	0.322115	0.319173	0.317697	0.315653	0.319643	0.318534	0.3153	0.314413	0.320482	0.318954	0.319904	0.321552	0.316939	0.315173	0.321326	0.319187	0.320846	0.320345	0.31877	0.317943	0.320473	0.318986	0.318657	0.318624	0.317504	0.315892	0.321344	0.320487	0.3218	0.318679	0.320048	0.316946	0.320958	0.320396	0.321113	0.319375	0.322357	0.319236	0.317264	0.31398	0.321714
350	UP2142-T	1427543	0.316888	0.316724	0.317323	0.316356	0.316522	0.315466	0.320492	0.31686	0.315971	0.31316	0.317434	0.315855	0.313025	0.311825	0.318446	0.316385	0.317897	0.319151	0.314959	0.312533	0.319377	0.316452	0.318846	0.317915	0.316303	0.315248	0.318625	0.316538	0.316612	0.316128	0.315562	0.313237	0.319518	0.318158	0.32013	0.315834	0.318245	0.314366	0.318979	0.318021	0.319169	0.316814	0.320822	0.316657	0.315398	0.311299	0.319714
351	UP2153-B	1412687	0.259903	0.260549	0.260918	0.261172	0.284595	0.283959	0.259307	0.256388	0.261623	0.259628	0.254873	0.253829	0.260413	0.259539	0.255551	0.254265	0.253636	0.256095	0.255684	0.253831	0.255071	0.25307	0.254719	0.254172	0.25746	0.256725	0.257215	0.255611	0.255099	0.255239	0.25379	0.252269	0.255539	0.25467	0.25371	0.250815	0.254877	0.255411	0.257358	0.257029	0.256059	0.254255	0.25554	0.25245	0.259222	0.257671	0.25631
352	UP2153-T	1421664	0.25915	0.259583	0.260233	0.260175	0.283474	0.282691	0.258736	0.255455	0.26094	0.25847	0.253943	0.252645	0.259383	0.258372	0.254679	0.253069	0.252839	0.255017	0.254956	0.252769	0.254342	0.251899	0.25386	0.253057	0.256181	0.255431	0.256395	0.254472	0.254201	0.254032	0.252858	0.251003	0.254561	0.253317	0.253005	0.249487	0.253911	0.254278	0.256585	0.255735	0.255083	0.252994	0.254986	0.251295	0.258593	0.25653	0.255805
353	UP2159-B	1416855	0.322632	0.323064	0.322895	0.322699	0.324503	0.323888	0.326874	0.323999	0.320597	0.318655	0.322318	0.321317	0.3194	0.318549	0.323554	0.322105	0.324127	0.326	0.319427	0.317724	0.324543	0.322544	0.323907	0.323414	0.323369	0.322507	0.322934	0.321395	0.322298	0.322311	0.322207	0.320628	0.324541	0.323876	0.32511	0.322194	0.323493	0.320399	0.324928	0.324537	0.323864	0.322323	0.325396	0.322404	0.321189	0.317992	0.325039
354	UP2159-T	1428499	0.320265	0.319898	0.320748	0.319604	0.321841	0.320703	0.324949	0.321081	0.318388	0.315471	0.319416	0.317742	0.31651	0.315129	0.321055	0.318838	0.321727	0.323333	0.316888	0.314195	0.322221	0.319111	0.32138	0.320322	0.320088	0.318933	0.320589	0.318161	0.319654	0.319079	0.319472	0.316964	0.32217	0.320865	0.322873	0.318294	0.321229	0.317011	0.322585	0.321588	0.321401	0.318983	0.323342	0.318839	0.318826	0.314573	0.322555
355	UP2187-B	1420874	0.321206	0.321349	0.32159	0.321055	0.32279	0.322006	0.32519	0.322096	0.319833	0.317767	0.322034	0.320813	0.318022	0.317132	0.32325	0.321654	0.32249	0.324029	0.318628	0.316731	0.323955	0.321561	0.323428	0.322862	0.321276	0.320279	0.322226	0.320599	0.320416	0.320244	0.320084	0.318327	0.323295	0.322308	0.323721	0.320397	0.323421	0.320373	0.323172	0.322629	0.323022	0.321198	0.323407	0.320088	0.319668	0.316235	0.323818
356	UP2187-T	1423875	0.321525	0.321295	0.321818	0.320911	0.322866	0.321968	0.325612	0.322285	0.320055	0.317595	0.322216	0.320757	0.31817	0.317092	0.323497	0.32175	0.322638	0.32397	0.318955	0.316774	0.324264	0.321593	0.323758	0.322965	0.321024	0.320144	0.322446	0.320486	0.320636	0.320204	0.320404	0.318356	0.323611	0.322298	0.324239	0.320275	0.323769	0.320424	0.323555	0.322722	0.323223	0.321157	0.323852	0.32002	0.320084	0.316336	0.323967
357	UP2197-B	1421758	0.317499	0.31789	0.317994	0.317607	0.318916	0.318108	0.322244	0.319116	0.31647	0.314265	0.317213	0.315999	0.313941	0.313035	0.318547	0.316932	0.319307	0.320904	0.315253	0.313339	0.320199	0.317857	0.320165	0.31957	0.318554	0.317702	0.317364	0.31589	0.316421	0.316265	0.317668	0.315915	0.319808	0.318976	0.320069	0.316746	0.318091	0.316438	0.319514	0.318888	0.319831	0.318053	0.319653	0.316355	0.316366	0.313001	0.320163
358	UP2197-T	1425209	0.316201	0.316331	0.316645	0.316014	0.317645	0.316657	0.321184	0.317759	0.315237	0.312712	0.315877	0.314427	0.312607	0.311499	0.317199	0.315389	0.317997	0.319484	0.313692	0.31146	0.318906	0.316217	0.319018	0.318209	0.317016	0.316011	0.315976	0.314197	0.31505	0.314706	0.316241	0.314166	0.31856	0.317438	0.318852	0.314985	0.31688	0.314757	0.318224	0.317349	0.318427	0.316401	0.318486	0.31474	0.315174	0.311358	0.318854
359	UP2213-B	1420798	0.321518	0.321649	0.321902	0.321392	0.321991	0.321199	0.325105	0.321966	0.319174	0.317074	0.32048	0.319343	0.317547	0.316651	0.322518	0.320987	0.322317	0.323846	0.317734	0.31591	0.324633	0.322427	0.323346	0.32286	0.321168	0.320282	0.32142	0.3198	0.320472	0.320367	0.321222	0.319575	0.322812	0.321911	0.32394	0.320621	0.323067	0.320505	0.323033	0.322482	0.32162	0.319856	0.324399	0.321206	0.319409	0.315971	0.323927
360	UP2213-T	1425985	0.320089	0.319918	0.320564	0.31965	0.320385	0.319346	0.324016	0.320363	0.317882	0.315196	0.318808	0.317325	0.315858	0.314703	0.321089	0.319152	0.320914	0.322344	0.316351	0.314014	0.323273	0.320521	0.32198	0.321188	0.319295	0.318322	0.320151	0.318054	0.318958	0.318574	0.319674	0.317572	0.321513	0.320221	0.32257	0.318487	0.321717	0.318665	0.321599	0.320695	0.320282	0.318073	0.323143	0.319199	0.31798	0.313951	0.322553
361	UP2258-B	1418381	0.297429	0.297994	0.297864	0.297812	0.300509	0.299786	0.299438	0.29651	0.296273	0.294125	0.296894	0.295776	0.29449	0.293549	0.295993	0.294305	0.296241	0.29817	0.294432	0.292577	0.298183	0.295946	0.2971	0.2965	0.296128	0.295272	0.29691	0.295348	0.296171	0.296221	0.295526	0.293867	0.295773	0.295099	0.296933	0.293729	0.29739	0.294514	0.298577	0.297896	0.296912	0.295119	0.296538	0.293234	0.296848	0.293916	0.297891
362	UP2258-T	1421197	0.296786	0.296953	0.297258	0.296752	0.299533	0.298542	0.298795	0.295442	0.295802	0.293203	0.295877	0.294485	0.293591	0.29237	0.295232	0.293259	0.295315	0.296903	0.293573	0.291338	0.297412	0.294652	0.296131	0.295235	0.29492	0.293833	0.296009	0.294061	0.295312	0.295191	0.294521	0.292491	0.29496	0.293759	0.295988	0.292127	0.296606	0.293273	0.297578	0.296644	0.296036	0.293872	0.296131	0.292253	0.29641	0.293017	0.296982
363	UP2264-B	1420965	0.321227	0.321491	0.321591	0.321105	0.322531	0.321707	0.325576	0.322514	0.319576	0.317255	0.321488	0.320282	0.318276	0.317324	0.32274	0.321049	0.32166	0.323247	0.318527	0.316533	0.324476	0.322176	0.323629	0.322965	0.32087	0.319924	0.322483	0.320756	0.320891	0.320674	0.321377	0.319585	0.323835	0.322814	0.323346	0.319911	0.322718	0.320538	0.323778	0.323061	0.322112	0.32029	0.324057	0.320648	0.320588	0.317087	0.324097
364	UP2264-T	1426711	0.320244	0.31999	0.320768	0.319685	0.321234	0.320089	0.3249	0.321235	0.318676	0.315761	0.320261	0.318567	0.317061	0.315747	0.322005	0.319819	0.320743	0.322162	0.317507	0.314888	0.323617	0.320578	0.322573	0.321549	0.319319	0.31815	0.321627	0.319412	0.31981	0.319279	0.320291	0.317877	0.322845	0.321431	0.322538	0.318014	0.321801	0.318952	0.322805	0.321765	0.321114	0.318743	0.323354	0.319003	0.319669	0.315413	0.323023
365	UP2267-B	1422508	0.321498	0.321587	0.321894	0.321341	0.321075	0.320323	0.324327	0.321194	0.319165	0.31687	0.321419	0.320295	0.316642	0.315725	0.322444	0.320836	0.321384	0.322749	0.318049	0.316115	0.323832	0.321373	0.322708	0.322038	0.321498	0.32062	0.32204	0.320395	0.319786	0.319462	0.32117	0.319458	0.323218	0.322334	0.322867	0.319412	0.32211	0.319441	0.323623	0.323047	0.322524	0.32071	0.323911	0.320591	0.318766	0.315365	0.324001
366	UP2267-T	1426502	0.321669	0.321286	0.322154	0.321091	0.320988	0.319984	0.324576	0.321123	0.319433	0.316764	0.321465	0.319957	0.316549	0.31537	0.322397	0.320491	0.321439	0.322205	0.318127	0.31578	0.323914	0.32104	0.322848	0.321949	0.321277	0.320279	0.322109	0.320106	0.319755	0.318989	0.321132	0.318991	0.323401	0.322111	0.322955	0.318888	0.322097	0.31914	0.323659	0.322838	0.322612	0.320449	0.324127	0.320238	0.319021	0.315124	0.32403
367	UP2317-B	1415800	0.322193	0.322611	0.322117	0.321789	0.324203	0.323614	0.326491	0.323748	0.321575	0.319693	0.324081	0.323052	0.319144	0.318367	0.324225	0.32286	0.324366	0.325938	0.320265	0.318596	0.325799	0.323763	0.324512	0.324089	0.323239	0.322429	0.324092	0.322615	0.323251	0.323091	0.322703	0.321252	0.325053	0.324358	0.326161	0.32314	0.323648	0.322467	0.324461	0.32391	0.324131	0.32248	0.324475	0.321579	0.321918	0.31879	0.326069
368	UP2317-T	1425578	0.31952	0.319358	0.319759	0.318622	0.32149	0.320496	0.324431	0.320836	0.319352	0.316626	0.321183	0.319691	0.316288	0.315159	0.3218	0.319748	0.321814	0.323167	0.317646	0.315232	0.323395	0.320465	0.322008	0.32112	0.320235	0.319107	0.321728	0.319572	0.320584	0.32	0.319973	0.317855	0.322603	0.321332	0.323762	0.319553	0.321284	0.319232	0.321882	0.321007	0.321643	0.319342	0.322352	0.318325	0.3194	0.315461	0.32349
369	UP2330-B	1418951	0.320248	0.320454	0.320476	0.320083	0.321636	0.321008	0.324982	0.322079	0.320017	0.318079	0.321823	0.320819	0.318519	0.317673	0.323041	0.321618	0.322619	0.324186	0.318267	0.316487	0.323495	0.321426	0.324036	0.323523	0.321595	0.320821	0.32318	0.321705	0.321274	0.321172	0.321195	0.319663	0.324107	0.323303	0.324116	0.320972	0.321276	0.320289	0.324057	0.323492	0.322951	0.321345	0.323611	0.320549	0.319874	0.31667	0.324692
370	UP2330-T	1426258	0.320634	0.320072	0.321047	0.319786	0.321716	0.320855	0.325533	0.322182	0.320476	0.318186	0.321911	0.320677	0.318811	0.317832	0.323333	0.321584	0.322943	0.324043	0.31855	0.316471	0.323903	0.321396	0.324347	0.323628	0.321807	0.320833	0.3236	0.321742	0.321512	0.320939	0.321621	0.319679	0.324578	0.323538	0.324612	0.320951	0.321536	0.320276	0.324253	0.323604	0.323213	0.321267	0.324131	0.320601	0.320361	0.316699	0.324893
371	UP2351-B	1410776	0.323716	0.32442	0.323527	0.323712	0.325466	0.32492	0.327724	0.325206	0.323478	0.321755	0.32511	0.324261	0.321376	0.32068	0.326148	0.324948	0.325986	0.327911	0.321014	0.31952	0.327374	0.325593	0.325925	0.325608	0.325313	0.324531	0.325746	0.324511	0.324024	0.324055	0.324428	0.323127	0.32691	0.326282	0.326349	0.32359	0.325258	0.322949	0.326552	0.326012	0.325292	0.323819	0.326494	0.323895	0.323426	0.320345	0.327221
372	UP2351-T	1424027	0.32212	0.322196	0.322086	0.321445	0.323426	0.322581	0.326362	0.323056	0.321983	0.319527	0.323049	0.321784	0.319519	0.318488	0.324513	0.322755	0.324118	0.325748	0.319135	0.317056	0.325716	0.323172	0.324181	0.323405	0.322703	0.321801	0.324211	0.322358	0.322327	0.322021	0.322545	0.320636	0.325346	0.324092	0.324602	0.320808	0.323694	0.320546	0.324762	0.323837	0.323573	0.32155	0.325272	0.321588	0.3217	0.317865	0.325579
373	UP2360-B	1421492	0.320239	0.320557	0.320512	0.320158	0.322419	0.321672	0.324782	0.321637	0.31887	0.316673	0.320765	0.319562	0.316981	0.316054	0.322704	0.321044	0.321562	0.32306	0.317716	0.315787	0.32281	0.320374	0.322809	0.322119	0.321045	0.320136	0.322401	0.320662	0.32147	0.321241	0.321106	0.319293	0.323336	0.32237	0.322863	0.319383	0.322329	0.319939	0.324291	0.323629	0.321243	0.319382	0.322556	0.319034	0.320147	0.316651	0.324288
374	UP2360-T	1426627	0.319171	0.319054	0.319541	0.318684	0.321167	0.320167	0.323948	0.320283	0.317904	0.315189	0.319463	0.317888	0.315532	0.314314	0.321597	0.319541	0.320413	0.32179	0.316652	0.314252	0.32173	0.31876	0.321619	0.320682	0.319447	0.318465	0.32144	0.319218	0.320287	0.319685	0.319818	0.317548	0.322273	0.320953	0.321857	0.317562	0.3213	0.318299	0.323272	0.322294	0.320127	0.31779	0.32169	0.317461	0.319104	0.315062	0.323169
375	UP2370-B	1415437	0.321803	0.322452	0.321984	0.322082	0.323524	0.32284	0.326095	0.323381	0.319697	0.317755	0.322866	0.321967	0.318336	0.317571	0.324177	0.322797	0.322661	0.324283	0.319297	0.317649	0.324063	0.322019	0.324277	0.323797	0.322679	0.321779	0.322439	0.321007	0.321411	0.32138	0.321103	0.319667	0.324398	0.323499	0.324902	0.321841	0.323183	0.321168	0.324199	0.323709	0.323424	0.321952	0.323316	0.320398	0.320487	0.316405	0.324419
376	UP2370-T	1425555	0.320606	0.320651	0.320889	0.320315	0.322004	0.321005	0.325347	0.321974	0.318768	0.316136	0.321446	0.320116	0.316867	0.315831	0.322925	0.321087	0.321395	0.322489	0.318011	0.315789	0.322968	0.320263	0.323198	0.322312	0.320963	0.31987	0.321407	0.319393	0.320176	0.319708	0.319741	0.317749	0.323263	0.321931	0.323823	0.319791	0.322035	0.319418	0.323035	0.322155	0.322164	0.320202	0.322427	0.31865	0.319317	0.314524	0.323139
377	UP2372-B	1419623	0.320871	0.321216	0.321103	0.32083	0.322012	0.321247	0.324522	0.321731	0.319258	0.317118	0.320684	0.319539	0.316486	0.315609	0.32309	0.321611	0.321607	0.323317	0.31881	0.31698	0.324189	0.321992	0.324043	0.323547	0.322237	0.321414	0.321742	0.320246	0.321356	0.321296	0.320561	0.318991	0.32404	0.32311	0.324794	0.321604	0.322981	0.320613	0.323507	0.322905	0.323514	0.321807	0.323595	0.32051	0.319137	0.314773	0.324899
378	UP2372-T	1427818	0.319284	0.319074	0.319689	0.318715	0.320268	0.319117	0.323344	0.319836	0.317753	0.314956	0.318773	0.317101	0.314594	0.313391	0.321488	0.319468	0.319957	0.321389	0.317091	0.314583	0.322697	0.319747	0.322461	0.321509	0.320119	0.319015	0.320346	0.318221	0.319678	0.319175	0.318796	0.316517	0.322443	0.321056	0.323298	0.318994	0.321476	0.318332	0.321929	0.320971	0.321841	0.31948	0.32231	0.31823	0.317596	0.312462	0.323164
379	UP2380-B	1424302	0.320205	0.320232	0.320536	0.319898	0.321029	0.320136	0.323648	0.320414	0.318278	0.315816	0.319651	0.318247	0.316511	0.315473	0.321387	0.319529	0.321743	0.323367	0.318185	0.315992	0.322884	0.320064	0.322913	0.322155	0.320206	0.319224	0.321767	0.319808	0.31985	0.319535	0.319607	0.317653	0.322204	0.321002	0.321858	0.318106	0.321416	0.31818	0.322802	0.321885	0.321896	0.319805	0.323155	0.319447	0.320716	0.31689	0.323547
380	UP2380-T	1424409	0.320223	0.320198	0.320587	0.319844	0.321032	0.320047	0.323687	0.320411	0.317917	0.315368	0.320001	0.318527	0.31655	0.31544	0.321466	0.319579	0.321801	0.323393	0.318145	0.315863	0.322826	0.319935	0.322944	0.322118	0.320131	0.319164	0.321849	0.319828	0.319913	0.319477	0.319617	0.317619	0.322294	0.321012	0.322091	0.318264	0.321456	0.318195	0.322799	0.321869	0.321923	0.319823	0.323302	0.319485	0.320785	0.316891	0.323487
381	UP2396-B	1421715	0.32096	0.321058	0.321202	0.320716	0.32147	0.320673	0.324426	0.321302	0.319333	0.316976	0.320409	0.31916	0.317628	0.316694	0.322233	0.320578	0.321657	0.323313	0.318816	0.316885	0.322993	0.320623	0.323511	0.322872	0.321557	0.320608	0.321699	0.320138	0.321002	0.320851	0.320562	0.318803	0.322607	0.321668	0.323732	0.320324	0.322058	0.319489	0.32251	0.321865	0.322016	0.320216	0.323215	0.319851	0.319817	0.31635	0.323139
382	UP2396-T	1427718	0.319859	0.319355	0.320248	0.319069	0.320136	0.319	0.323597	0.319811	0.318274	0.315285	0.319077	0.317314	0.316134	0.314823	0.321064	0.318908	0.320436	0.321979	0.317621	0.314956	0.321926	0.318884	0.322399	0.321406	0.319812	0.318696	0.320677	0.318486	0.31977	0.319184	0.319289	0.316886	0.321482	0.320092	0.322738	0.318152	0.321075	0.317665	0.321382	0.320343	0.320936	0.318479	0.322267	0.317882	0.318747	0.314543	0.321955
[truncated: 335 more columns]
