# Supplementary material for: African-specific prostate cancer molecular taxonomy
Source: Research Square preprint supplement (doi:10.21203/rs.3.rs-1122619/v1), 2021-12-01
Supplement: Supplementary file 16 [file ddfadfa8f1513dbab858cec6.xlsx]

## Sheet: Sheet1
Sample	nlgLH (highest llh)	llh	Nodes	Cellular_prevalence	CCF	Tree_index	Pattern	Index	pop0_num_ssms	pop0_num_cnvs	pop1_num_ssms	pop1_num_cnvs	pop1_num_physical_cnvs (titan 10kb)	pop2_num_ssms	pop2_num_cnvs	pop2_num_physical_cnvs (titan 10kb)	pop3_num_ssms	pop3_num_cnvs	pop3_num_physical_cnvs (titan 10kb)	pop4_num_ssms	pop4_num_cnvs	pop4_num_physical_cnvs (titan 10kb)	pop5_num_ssms	pop5_num_cnvs	pop5_num_physical_cnvs (titan 10kb)	clonal_[early]_num_ssms	clonal_[late]_num_ssms	clonal_[NA]_num_ssms	subclonal_num_ssms	branch_length.subclonal	branch_length.clonal	CpG_SNV/Gb (divided by 6)	Age	Average_mutation_rate	PCa_subtype
10651-T	7.8	-19996.8	5	1, 0.765, 0.408, 0.196, 0.061	0, 1, 0.533, 0.256, 0.080	8765	Mutually exclusive	8765	0	0	2530	3	61	202	0	0	420	1	1	527	800	800	na	na	na	1311	533	512	1294	73.4863	460.894	89.0634	68	1.30976	A
10734-T	3.8	-140.72	3	1, 0.816, 0.295	0, 1, 0.362	847	Co-occurrence	847	0	0	2	0	0	52	1	9	na	na	na	na	na	na	na	na	na	0	0	0	54	0.989158	0.0108422	0.166667	66	0.00252525	A
10738-1042949-T	3.1	-6388.04	2	1, 0.340	0, 1	9472	Co-occurrence	9472	0	0	2966	1	243	na	na	na	na	na	na	na	na	na	na	na	na	0	2	2964	0	0	507	84.5	59	1.4322	A
11099-T	3.2	-716.041	3	1, 0341, 0.171	0, 1, 0.502	1899	Co-occurrence	1899	0	0	9	1	189	315	0	0	na	na	na	na	na	na	na	na	na	10	1	0	313	29.4632	0.53683	5	70	0.0714286	A
11119-T	10.9	-665.03	2	1, 0.330	0, 1	2296	Co-occurrence	2296	0	0	88	100	282	na	na	na	na	na	na	na	na	na	na	na	na	4	0	47	37	1.90494	4.09506	1	67	0.0149254	A
11265-T	7.2	-544.206	3	1, 0.382, 0.291	0, 1, 0.760	1489	Co-occurrence	1489	0	0	29	1	218	80	36	36	na	na	na	na	na	na	na	na	na	27	0	21	61	3.38877	2.73346	1.02037	67	0.0152294	A
11452-1056021-T	3	-3293.3	2	1, 0.251	0, 1	9737	Co-occurrence	9737	0	0	1569	1	346	na	na	na	na	na	na	na	na	na	na	na	na	0	13	1556	0	0	196	32.6667	67	0.487562	A
11532-T	4.3	-134.689	3	1, 0.392, 0.203	0, 1, 0.519	5360	Co-occurrence	5360	0	0	24	1	222	21	0	0	na	na	na	na	na	na	na	na	na	12	12	2	19	1.35352	1.51587	0.478232	69	0.0069309	A
11590-T	4.3	-10003.1	3	1, 0.345, 0.222	0, 1, 0.643	2	Co-occurrence	2	0	0	2856	1	113	513	0	0	na	na	na	na	na	na	na	na	na	0	0	3094	275	100.128	527.427	104.593	61	1.71463	A
11830-T	5	-13295.5	5	1, 0.999, 0.699, 0.330, 0.172	0, 1, 0.699, 0.330, 0.172	7587	Mutually exclusive	7587	0	0	313	0	0	3152	1	80	49	0	0	292	0	0	na	na	na	1	1	3397	407	19.5271	520.325	89.9754	60	1.49959	A
11874-T	4.3	-224.333	3	1, 0.432, 0.244	0, 1, 0.564	8947	Co-occurrence	8947	0	0	46	1	232	30	0	0	na	na	na	na	na	na	na	na	na	19	32	2	23	1.04093	1.36439	0.400887	65	0.00616749	A
11926-T	6.4	-16145.8	4	1, 0.788, 0.316, 0.188	0, 1, 0.401, 0.239	357	Co-occurrence	357	0	0	1962	1	1	1133	174	264	517	1	1	na	na	na	na	na	na	2029	8	105	1467	176.895	336.638	85.5888	57	1.50156	A
12103-T	12.9	-1373.09	3	1, 0.593, 0.248	0, 1, 0.419	9880	Co-occurrence	9880	0	0	82	136	360	72	0	0	na	na	na	na	na	na	na	na	na	7	77	0	70	3.44354	4.73421	1.36296	67	0.0203427	A
12543-1081384-T	4.6	-9703.5	3	1, 0.482, 0.214	0, 1, 0.443	9786	Co-occurrence	9786	0	0	2329	1	144	742	0	0	na	na	na	na	na	na	na	na	na	0	0	2366	705	71.2927	467.244	89.7562	52	1.72608	A
12571-T	3.5	-557.878	3	1, 0.430, 0.210	0, 1, 0.489	3188	Co-occurrence	3188	0	0	6	1	781	223	0	0	na	na	na	na	na	na	na	na	na	5	7	0	217	13.9871	1.85212	2.63986	67	0.0394009	A
13019-T	5.4	-4450.95	3	1, 0.332, 0.179	0, 1, 0.54	1544	Co-occurrence	1544	0	0	153	240	651	1043	0	0	na	na	na	na	na	na	na	na	na	1	34	4	1157	34.2075	5.6322	6.63995	69	0.0962312	A
13104-1095757-T	6.1	-19523.7	4	1, 0.398, 0.245, 0.151	0, 1, 0.615, 0.378	2850	Mutually exclusive	2850	0	0	1377	1	285	1976	2	2	1257	560	560	na	na	na	na	na	na	198	106	1314	2991	369.442	352.959	120.4	56	2.15	A
13179-1096899-T	4.8	-13750.7	4	1, 0.977, 0.505, 0.193	0, 1, 0.516, 0.198	4785	Co-occurrence	4785	0	0	89	0	0	2910	1	172	1100	0	0	na	na	na	na	na	na	189	0	2161	1749	111.1	567.324	113.071	59	1.91645	A
13518-T	3.4	-1120.79	3	1, 0.440, 0.210	0, 1, 0.476	4564	Co-occurrence	4564	0	0	7	1	248	472	0	0	na	na	na	na	na	na	na	na	na	5	2	0	472	83.2572	0.74282	14	70	0.2	A
14919-T	6.5	-16144.5	3	1, 0.447, 0.277	0, 1, 0.618	5281	Co-occurrence	5281	0	0	1061	1	552	2499	0	0	na	na	na	na	na	na	na	na	na	0	880	73	2583	269.445	198.712	78.0261	67	1.16457	A
15178-T	3.5	-7628.78	3	1, 0.440, 0.228	0, 1, 0.518	4802	Co-occurrence	4802	0	0	84	0	0	3057	1	27	na	na	na	na	na	na	na	na	na	0	2	3139	0	0	327	54.5	61	0.893443	A
15917-1147612-T	4.7	-10175.8	3	1, 0.403, 0.218	0, 1, 0.541	6899	Co-occurrence	6899	0	0	2655	1	462	445	0	0	na	na	na	na	na	na	na	na	na	468	1820	560	252	22.0499	289.551	51.9334	54	0.96173	A
16000-T	29	-2374.13	2	1, 0.286	0, 1	225	Co-occurrence	225	0	0	118	426	989	na	na	na	na	na	na	na	na	na	na	na	na	8	46	12	52	11.3442	10.6558	3.66667	54	0.0679012	A
16176-T	4.5	-12404.7	3	1, 0.349, 0.183	0, 1, 0.526	3181	Co-occurrence	3181	0	0	2868	1	271	1085	0	0	na	na	na	na	na	na	na	na	na	1	0	2932	1020	82.2299	302.896	64.1877	64	1.00293	A
16263-T	62.2	-5520.2	3	1, 0.436, 0.195	0, 1, 0.448	9408	Co-occurrence	9408	0	0	97	241	444	31	0	0	na	na	na	na	na	na	na	na	na	4	23	11	90	1.93376	2.58563	0.753232	63	0.0119561	A
16599-T	4.7	-11994.4	4	1, 0.666, 0.396, 0.178	0, 1, 0.595, 0.267	8220	Mutually exclusive	8220	0	0	3446	1	254	174	0	0	67	0	0	na	na	na	na	na	na	46	8	3461	172	32.6205	693.06	120.947	67	1.80518	A
16677-T	4	-4230.67	4	1, 0.452, 0.258, 0.163	0, 1, 0.57, 0.362	8541	Mutually exclusive	8541	0	0	26	1	183	1423	0	0	76	0	0	na	na	na	na	na	na	6	14	0	1505	148.824	9.25007	26.3457	65	0.405319	A
16995-T	4.9	-18947.6	3	1, 0.510, 0.164	0, 1, 0.322	4673	Co-occurrence	4673	0	0	4329	1	217	1250	0	0	na	na	na	na	na	na	na	na	na	1	0	4316	1259	22.1212	365.351	64.5786	50	1.29157	A
17135-T	4.3	-238.878	4	1, 0.511, 0.232, 0.076	0, 1, 0.454, 0.148	2876	Mutually exclusive	2876	0	0	13	1	54	66	0	0	1	0	0	na	na	na	na	na	na	0	0	11	69	5.72564	0.27436	1	63	0.015873	A
17212-T	4.5	-9492.89	4	1, 0.728, 0.332, 0.237	0, 1, 0.456, 0.326	12357	Mutually exclusive	12357	0	0	30	0	0	2134	1	700	885	0	0	na	na	na	na	na	na	71	0	19	2957	436.904	60.9121	82.9693	62	1.33821	A
17392-T	3.7	-185.664	2	1, 0.258	0, 1	3484	Co-occurrence	3484	0	0	72	1	259	na	na	na	na	na	na	na	na	na	na	na	na	19	0	53	0	0	7	1.16667	53	0.0220126	A
17827-T	4.1	-295.174	3	1, 0.371, 0.184	0, 1, 0.497	941	Co-occurrence	941	0	0	91	1	248	12	0	0	na	na	na	na	na	na	na	na	na	16	0	74	13	1.53766	9.46234	1.83333	68	0.0269608	A
18210-T	10.9	-1056.88	3	1, 0.4, 0.161	0, 1, 0.403	659	Co-occurrence	659	0	0	107	133	223	33	0	0	na	na	na	na	na	na	na	na	na	14	85	3	38	2.73144	6.10312	1.47243	69	0.0213395	A
5060-1034766-T	6.6	-14852.9	4	1, 0.410, 0.322, 0.169	0, 1, 0.785, 0.413	121	Co-occurrence	121	0	0	2554	37	111	345	186	186	359	0	0	na	na	na	na	na	na	1595	2	229	1432	214.019	407.225	103.541	55	1.88256	A
5287-1079625-T	5.6	-13953	3	1, 0.442, 0.219	0, 1, 0.496	4383	Co-occurrence	4383	0	0	1757	230	316	1807	1	1	na	na	na	na	na	na	na	na	na	155	0	341	3067	287.222	80.9452	61.3612	54	1.13632	A
5545-1079775-T	5.2	-15371.5	4	1, 0.784, 0.489, 0.205	0, 1, 0.624, 0.261	5327	Mutually exclusive	5327	0	0	2830	1	208	353	0	0	1106	0	0	na	na	na	na	na	na	57	0	2838	1394	47.1634	315.827	60.4984	59	1.0254	A
5656-1034950-T	5.1	-23260.4	6	1, 0.981, 0.534, 0.328, 0.409, 0.215	0, 1, 0.544, 0.334, 0.417, 0.219	7558	Mutually exclusive	7558	0	0	66	0	0	729	0	0	131	1	353	3006	0	0	2669	0	0	407	0	0	6194	793.419	69.975	143.899	65	2.21383	A
5684-1079906-T	5.8	-16920.4	3	1, 0.764, 0.261	0, 1, 0.342	8393	Co-occurrence	8393	0	0	3677	1	335	568	0	0	na	na	na	na	na	na	na	na	na	1101	175	2425	544	31.6149	518.345	91.6601	60	1.52767	A
5902-1035059-T	3.2	-4324.7	2	1, 0.241	0, 1	5281	Co-occurrence	5281	0	0	1943	1	43	na	na	na	na	na	na	na	na	na	na	na	na	0	0	1943	0	0	305	50.8333	46	1.10507	A
5958-1040497-T	3.5	-8386.24	3	1, 0.329, 0.223	0, 1, 0.678	246	Co-occurrence	246	0	0	192	66	385	3304	2	2	na	na	na	na	na	na	na	na	na	3	0	26	3467	169.536	9.86207	29.8996	54	0.553697	A
6068-T	5.4	-15383.5	3	1, 0.562, 0.213	0, 1, 0.378	4407	Co-occurrence	4407	0	0	3773	1	282	373	0	0	na	na	na	na	na	na	na	na	na	903	61	2826	356	24.3871	651.761	112.691	58	1.94295	A
6359-1050886-T	5.4	-12685.5	3	1, 0.480, 0.246	0, 1, 0.513	5896	Co-occurrence	5896	0	0	2018	1	406	1368	0	0	na	na	na	na	na	na	na	na	na	172	5	1965	1236	157.929	417.66	95.9315	55	1.74421	A
BRA04-T	65.4	-3945.37	3	1, 0.378, 0.259	0, 1, 0.687	1035	Co-occurrence	1035	0	0	5	1	794	82	783	783	na	na	na	na	na	na	na	na	na	14	23	3	47	4.12355	0.851742	0.829215	59	0.0140545	A
BRA05-T	4.2	-9886.05	3	1, 0.385, 0.22	0, 1, 0.573	5799	Co-occurrence	5799	0	0	2856	1	109	559	0	0	na	na	na	na	na	na	na	na	na	0	0	2734	681	124.379	582.348	117.788	71	1.65898	A
BRA07-T	5	-14633.9	3	1, 0.546, 0.178	0, 1, 0.325	9030	Co-occurrence	9030	0	0	3030	1	269	1162	0	0	na	na	na	na	na	na	na	na	na	2	1	2993	1196	62.2259	570.351	105.43	66	1.59742	A
BRA08-T	5.6	-5681.91	2	1, 0.340	0, 1	2445	Co-occurrence	2445	0	0	1468	298	529	na	na	na	na	na	na	na	na	na	na	na	na	755	0	136	577	35.406	70.5778	17.664	70	0.252342	A
BRA10-T	4.8	-13414.9	2	1, 0.383	0, 1	747	Co-occurrence	747	0	0	4070	1	399	na	na	na	na	na	na	na	na	na	na	na	na	1050	2689	331	0	0	830	138.333	68	2.03431	A
BRA13-T	5.5	-12253.5	3	1, 0.479, 0.164	0, 1, 0.343	2160	Co-occurrence	2160	0	0	2574	1	327	657	0	0	na	na	na	na	na	na	na	na	na	1243	1150	102	736	19.408	260.865	46.7122	64	0.729878	A
BRA15-T	4.9	-13860.3	3	1, 0.438, 0.197	0, 1, 0.451	4615	Co-occurrence	4615	0	0	4007	1	693	80	0	0	na	na	na	na	na	na	na	na	na	497	50	3431	108	4.10466	545.403	91.5846	71	1.28992	A
KAL0013-T	5.8	-19900	3	1, 0.450, 0.155	0, 1, 0.345	5420	Co-occurrence	5420	0	0	4103	1	3506	812	0	0	na	na	na	na	na	na	na	na	na	1623	1749	750	793	60.1624	426.942	81.1841	69	1.17658	A
KAL0022-T	3.4	-8691.82	2	1, 0.209	0, 1	3265	Co-occurrence	3265	0	0	3673	1	731	na	na	na	na	na	na	na	na	na	na	na	na	1	3151	521	0	0	462	77	68	1.13235	A
KAL0054-T	10.8	-15588.5	3	1, 0.433, 0.160	0, 1, 0.370	1489	Co-occurrence	1489	0	0	262	1639	2310	1825	0	0	na	na	na	na	na	na	na	na	na	1	0	22	2062	69.3331	2.46633	11.9666	64	0.186978	A
KAL0074-T	15.3	-51615.7	2	1, 0.172	0, 1	4599	Co-occurrence	4599	0	0	4856	1	2737	na	na	na	na	na	na	na	na	na	na	na	na	4	2739	1935	0	0	585	97.5	67	1.45522	A
KAL0078-T	3.6	-6584.49	3	1, 0.469, 0.192	0, 1, 0.409	4128	Co-occurrence	4128	0	0	40	1	12	2587	0	0	na	na	na	na	na	na	na	na	na	0	0	21	2606	90.0165	2.64725	15.444	60	0.257399	A
KAL0091-T	4.7	-13351.2	3	1, 0.326, 0.147	0, 1, 0.451	1399	Co-occurrence	1399	0	0	2843	1	911	1231	0	0	na	na	na	na	na	na	na	na	na	1	1	2782	1287	121.217	366.577	81.2988	70	1.16141	A
KAL0101-T	79.1	-12009.6	2	1, 0.260	0, 1	7427	Co-occurrence	7427	0	0	219	2572	3120	na	na	na	na	na	na	na	na	na	na	na	na	1	6	102	110	4.81544	11.0956	2.65184	71	0.0373499	A
KAL0106-T	3.1	-6678.14	2	1, 0.163	0, 1	2319	Co-occurrence	2319	0	0	3102	1	13	na	na	na	na	na	na	na	na	na	na	na	na	0	1	3101	0	0	375	62.5	67	0.932836	A
KAL0107-T	22.2	-15790.6	2	1, 0.279	0, 1	2073	Co-occurrence	2073	0	0	1024	2781	3275	na	na	na	na	na	na	na	na	na	na	na	na	3	13	238	767	109.909	49.0824	26.4985	67	0.3955	A
N0001-T	5.3	-18824	3	1, 0.549, 0.172	0, 1, 0.314	9611	Co-occurrence	9611	0	0	3441	1	96	1722	0	0	na	na	na	na	na	na	na	na	na	97	1	3378	1687	132.076	748.914	146.832	75	1.95775	A
N0002-T	8.8	-33657	3	1, 0.597, 0.086	0, 1, 0.143	306	Co-occurrence	306	0	0	4622	2	2	919	2539	2630	na	na	na	na	na	na	na	na	na	208	55	732	4491	488.095	124.324	102.07	76	1.34302	A
N0007-T	3.1	-5170.03	2	1, 0.203	0, 1	4121	Co-occurrence	4121	0	0	2400	1	1327	na	na	na	na	na	na	na	na	na	na	na	na	3	1963	433	0	0	333	55.5	78	0.711538	A
N0010-T	4.6	-13390.6	4	1, 0.969, 0.514, 0.186	0, 1, 0.531, 0.192	1827	Co-occurrence	1827	0	0	128	0	0	3582	1	126	475	0	0	na	na	na	na	na	na	29	0	3352	804	81.9382	675.435	126.229	NA		A
N0048-T	3.5	-10499.5	3	1, 0.748, 0.215	0, 1, 0.287	2627	Co-occurrence	2627	0	0	77	0	0	4221	1	1106	na	na	na	na	na	na	na	na	na	63	14	9	4208	412.748	30.3678	73.8527	70	1.05504	A
N0053-T	4.2	-16050.9	2	1, 0.301	0, 1	6	na (only 1 tumour clone)	6	0	0	5578	1	614	na	na	na	na	na	na	na	na	na	na	na	na	566	592	4420	0	0	644	107.333	71	1.51174	A
N0061-T	11.2	-5673.62	3	1, 0.459, 0.213	0, 1, 0.463	621	Co-occurrence	621	0	0	204	607	839	529	0	0	na	na	na	na	na	na	na	na	na	3	0	21	709	33.6582	2.2142	5.97874	71	0.0842075	A
N0067-T	4.7	-20252.7	4	1, 0.925, 0.340, 0.187	0, 1, 0.368, 0.202	2538	Mutually exclusive	2538	0	0	279	0	0	4846	1	2635	1142	0	0	na	na	na	na	na	na	293	2044	798	3015	131.688	248.453	63.3568	69	0.918215	A
N0073-T	5.5	-16327.2	5	1, 0.855, 0.598, 0.523, 0.222	0, 1, 0.699, 0.611, 0.259	1727	Mutually exclusive	1727	0	0	515	0	0	54	0	0	1882	1	1644	1861	0	0	na	na	na	448	369	1424	2021	124.462	310.755	72.5363	62	1.16994	A
N0077-T	10.7	-4538.67	3	1, 0.286, 0.133	0, 1, 0.466	9360	Co-occurrence	9360	0	0	503	522	815	107	0	0	na	na	na	na	na	na	na	na	na	0	1	105	504	29.4888	16.4263	7.65251	70	0.109322	A
N0081-T	6.6	-16022.3	3	1, 0.538, 0.158	0, 1, 0.294	3106	Co-occurrence	3106	0	0	2850	2	45	650	1070	1070	na	na	na	na	na	na	na	na	na	99	570	635	2176	280.344	200.537	80.1468	62	1.29269	A
N0084-T	7.1	-39761.1	4	1, 0.664, 0.348, 0.189	0, 1, 0.524, 0.284	595	Co-occurrence	595	0	0	4184	2	166	290	1	1	3555	733	733	na	na	na	na	na	na	133	52	4191	3589	242.182	490.175	122.06	65	1.87784	A
N0085-T	7.7	-15972.6	4	1, 0.566, 0.336, 0.152	0, 1, 0.593, 0.268	1278	Co-occurrence	1278	0	0	1900	1	264	877	560	560	222	0	0	na	na	na	na	na	na	276	56	1051	1615	207.182	239.095	74.3795	74	1.00513	A
SMU019-T	3	-3972.22	2	1, 0.145	0, 1	928	Co-occurrence	928	0	0	1920	1	39	na	na	na	na	na	na	na	na	na	na	na	na	0	0	1920	0	0	325	54.1667	65	0.833333	A
SMU027-T	4.4	-14314.9	3	1, 0.367, 0.159	0, 1, 0.432	2378	Co-occurrence	2378	0	0	3832	1	396	849	0	0	na	na	na	na	na	na	na	na	na	2	0	3786	891	105.128	716.24	136.895	68	2.01316	A
SMU029-T	3.2	-3584.79	3	1, 0.4, 0.151	0, 1, 0.377	4698	Co-occurrence	4698	0	0	16	1	41	1598	0	0	na	na	na	na	na	na	na	na	na	0	0	9	1605	134.603	0.396599	22.5	61	0.368852	A
SMU030-T	6.7	-26293.1	3	1, 0.416, 0.183	0, 1, 0.44	9702	Co-occurrence	9702	0	0	4991	908	1197	683	0	0	na	na	na	na	na	na	na	na	na	279	510	374	4511	608.791	196.275	134.178	68	1.9732	A
SMU032-T	8.6	-21887.5	3	1, 0.419, 0.255	0, 1, 0.608	2909	Co-occurrence	2909	0	0	57	1	336	3595	2435	2435	na	na	na	na	na	na	na	na	na	207	469	1799	1171	102.197	390.791	82.1647	67	1.22634	A
SMU047-T	5.5	-15185.9	3	1, 0.394, 0.23	0, 1, 0.583	469	Co-occurrence	469	0	0	1337	415	728	2667	1	1	na	na	na	na	na	na	na	na	na	9	613	20	3362	273.014	96.946	61.66	64	0.963438	A
SMU050-T	5.7	-18079.5	3	1, 0.561, 0.204	0, 1, 0.363	3837	Co-occurrence	3837	0	0	3576	1	1929	1020	0	0	na	na	na	na	na	na	na	na	na	2310	926	335	1025	69.8974	614.231	114.021	64	1.78158	A
SMU061-T	9.2	-42918.7	4	1, 0.513, 0.107, 0.107	0, 1, 0.208, 0.208	737	Mutually exclusive	737	0	0	3348	1	14	378	294	294	3001	2902	2902	na	na	na	na	na	na	1088	1095	2340	2066	245.675	482.791	121.411	65	1.86786	A
SMU062-T	4.3	-11783.1	2	1, 0.190	0, 1	4226	Co-occurrence	4226	0	0	3947	1	36	na	na	na	na	na	na	na	na	na	na	na	na	0	0	3947	0	0	835	139.167	60	2.31944	A
SMU064-T	24.2	-9734.32	2	1, 0.204	0, 1	3953	Co-occurrence	3953	0	0	581	1728	1852	na	na	na	na	na	na	na	na	na	na	na	na	0	56	379	146	14.9681	60.4492	12.5695	70	0.179565	A
SMU068-T	5.1	-16022.8	3	1, 0.429, 0.180	0, 1, 0.420	9546	Co-occurrence	9546	0	0	4261	1	441	291	0	0	na	na	na	na	na	na	na	na	na	1153	162	2985	251	23.7258	443.314	77.84	71	1.09634	A
SMU076-T	5	-13270.2	3	1, 0.380, 0.209	0, 1, 0.550	5666	Co-occurrence	5666	0	0	2572	1	1257	1242	0	0	na	na	na	na	na	na	na	na	na	485	2242	170	917	81.0784	529.188	101.711	64	1.58924	A
SMU079-T	5.7	-2069.8	3	1, 0.508, 0.179	0, 1, 0.352	2648	Co-occurrence	2648	0	0	17	1	5538	505	0	0	na	na	na	na	na	na	na	na	na	9	9	9	491	25.2788	1.97976	4.54309	65	0.0698936	A
SMU080-T	4.7	-13158.8	3	1, 0.512, 0.199	0, 1, 0.388	8132	Co-occurrence	8132	0	0	3670	1	366	397	0	0	na	na	na	na	na	na	na	na	na	218	0	3462	387	36.3489	467.138	83.9144	64	1.31116	A
SMU083-T	8.6	-28081.1	3	1, 0.424, 0.122	0, 1, 0.289	4951	Co-occurrence	4951	0	0	3815	3	66	887	2254	2254	na	na	na	na	na	na	na	na	na	595	278	962	2764	382.304	307.521	114.971	86	1.33687	A
SMU087-T	7.1	-64105.4	3	1, 0.349, 0.190	0, 1, 0.543	9257	Co-occurrence	9257	0	0	3769	1	272	9296	3171	3171	na	na	na	na	na	na	na	na	na	2321	1301	4752	4686	374.216	782.289	192.751	59	3.26696	A
SMU089-T	3.8	-7695.02	3	1, 0.314, 0.141	0, 1, 0.448	10769	Co-occurrence	10769	0	0	361	1	21	2563	0	0	na	na	na	na	na	na	na	na	na	0	0	188	2736	129.889	34.2298	27.3531	51	0.536335	A
SMU091-T	4.3	-12194.3	3	1, 0.389, 0.222	0, 1, 0.571	6404	Co-occurrence	6404	0	0	284	1	2860	3851	0	0	na	na	na	na	na	na	na	na	na	14	51	151	3915	274.163	51.1253	54.2147	77	0.704087	A
SMU094-T	12.2	-20673.4	3	1, 0.375, 0.162	0, 1, 0.431	4390	Co-occurrence	4390	0	0	495	1825	2395	1945	0	0	na	na	na	na	na	na	na	na	na	0	1	73	2365	122.075	11.4328	22.2512	64	0.347675	A
SMU097-T	4.4	-7088.93	4	1, 0.467, 0.267, 0.142	0, 1, 0.572, 0.304	2669	Mutually exclusive	2669	0	0	40	1	18	1774	0	0	509	0	0	na	na	na	na	na	na	0	0	9	2314	194.995	4.71258	33.2846	60	0.554743	A
SMU098-T	4.5	-15362.5	4	1, 0.982, 0.420, 0.175	0, 1, 0.428, 0.178	10572	Co-occurrence	10572	0	0	60	0	0	3853	1	255	970	0	0	na	na	na	na	na	na	127	2	2511	2243	113.249	272.825	64.3457	66	0.974935	A
SMU100-T	5.8	-7465.99	3	1, 0.439, 0.230	0, 1, 0.523	8808	Co-occurrence	8808	0	0	1269	205	324	578	0	0	na	na	na	na	na	na	na	na	na	2	0	527	1318	200.124	104.708	50.8053	56	0.907238	A
SMU101-T	3.5	-8191.55	2	1, 0.174	0, 1	6115	Co-occurrence	6115	0	0	3415	1	23	na	na	na	na	na	na	na	na	na	na	na	na	0	0	3415	0	0	431	71.8333	70	1.02619	A
SMU104-T	4.9	-17531.9	4	1, 0.948, 0.434, 0.177	0, 1, 0.457, 0.187	2163	Mutually exclusive	2163	0	0	163	0	0	3839	1	3058	1124	0	0	na	na	na	na	na	na	69	0	0	4995	471.367	43.4834	85.8083	76	1.12906	A
SMU106-T	3.3	-4866.24	3	1, 0.518, 0.153	0, 1, 0.296	4254	Co-occurrence	4254	0	0	21	1	16	2102	0	0	na	na	na	na	na	na	na	na	na	0	0	16	2107	83.1456	1.91351	14.1765	65	0.2181	A
SMU107-T	3.5	-7035.61	2	1, 0.178	0, 1	366	Co-occurrence	366	0	0	2876	1	13	na	na	na	na	na	na	na	na	na	na	na	na	0	0	2876	0	0	491	81.8333	70	1.16905	A
SMU111-T	139.3	-17281.6	3	1, 0.358, 0.117	0, 1, 0.326	2868	Co-occurrence	2868	0	0	173	3618	4061	6	0	0	na	na	na	na	na	na	na	na	na	2	4	21	152	8.96026	1.49301	1.74221	62	0.0281002	A
SMU167-T	4.7	-13684.9	4	1, 0.495, 0.314, 0.152	0, 1, 0.635, 0.307	5597	Mutually exclusive	5597	0	0	266	0	0	3018	1	3670	890	0	0	na	na	na	na	na	na	123	1000	1405	1607	181.038	521.99	117.171	74	1.5834	A
SMU177-T	3.5	-3454.44	3	1, 0.552, 0.269	0, 1, 0.487	3451	Co-occurrence	3451	0	0	28	1	4770	1376	0	0	na	na	na	na	na	na	na	na	na	18	3	6	1374	68.2449	6.06417	12.3848	54	0.229349	A
SMU183-T	27.1	-8553.57	3	1, 0.362, 0.127	0, 1, 0.351	4721	Co-occurrence	4721	0	0	242	1310	1935	214	0	0	na	na	na	na	na	na	na	na	na	2	25	15	414	16.1617	1.80283	2.99408	68	0.0440306	A
SMU195-T	8.1	-36426.9	3	1, 0.411, 0.161	0, 1, 0.390	5292	Co-occurrence	5292	0	0	4717	1674	2029	1769	0	0	na	na	na	na	na	na	na	na	na	196	405	412	5473	434.766	103.135	89.6502	72	1.24514	A
SMU196-T	3.4	-4262.01	2	1, 0.133	0, 1	2570	Co-occurrence	2570	0	0	1787	1	16	na	na	na	na	na	na	na	na	na	na	na	na	0	0	1787	0	0	274	45.6667	47	0.971631	A
SMU200-T	4.2	-502.796	3	1, 0.343, 0.187	0, 1, 0.545	9848	Co-occurrence	9848	0	0	67	1	38	104	0	0	na	na	na	na	na	na	na	na	na	0	0	61	110	5.11419	3.23246	1.39111	53	0.0262473	A
TSH001-T	3.7	-245.595	3	1, 0.481, 0.242	0, 1, 0.504	1850	Co-occurrence	1850	0	0	5	1	16	92	0	0	na	na	na	na	na	na	na	na	na	0	0	2	95	1.93839	0.0616092	0.333333	68	0.00490196	A
UP2003-T	4.8	-40007.5	3	1, 0.382, 0.191	0, 1, ,0.499	7563	Co-occurrence	7563	0	0	10677	1	1128	1248	0	0	na	na	na	na	na	na	na	na	na	2431	7374	1270	850	41.1025	668.534	118.273	76	1.55622	A
UP2004-T	3.9	-8422.92	3	1, 0.420, 0.205	0, 1, 0.488	1885	Co-occurrence	1885	0	0	82	1	14	3005	0	0	na	na	na	na	na	na	na	na	na	0	0	17	3070	197.004	6.70575	33.9516	70	0.485023	A
UP2035-T	3.3	-2098.23	3	1, 0.390, 0.120	0, 1, 0.308	8693	Co-occurrence	8693	0	0	45	1	20	867	0	0	na	na	na	na	na	na	na	na	na	0	0	36	876	42.6505	3.47605	7.68776	70	0.109825	A
UP2037-T	4.1	-346.134	4	1, 0.370, 0.157, 0.039	0, 1, 0.423, 0.105	6109	Mutually exclusive	6109	0	0	66	1	14	53	0	0	2	0	0	na	na	na	na	na	na	0	0	62	59	1.45335	2.10764	0.593498	65	0.00913074	A
UP2041-T	3.6	-181.288	3	1, 0.393, 0.221	0, 1, 0.561	9174	Co-occurrence	9174	0	0	1	1	21	71	0	0	na	na	na	na	na	na	na	na	na	0	0	0	72	3.96249	0.0375061	0.666667	78	0.00854701	A
UP2048-T	3.9	-380.252	4	1, 0.438, 0.334, 0.075	0, 1, 0.763, 0.171	6134	Mutually exclusive	6134	0	0	14	1	228	126	0	0	1	0	0	na	na	na	na	na	na	13	0	0	128	10.1445	1.08005	1.87076	59	0.0317078	A
UP2049-T	3.9	-797.9	3	1, 0.462, 0.133	0, 1, 0.288	9286	Co-occurrence	9286	0	0	58	1	22	237	0	0	na	na	na	na	na	na	na	na	na	0	0	53	242	6.90937	1.97058	1.47999	74	0.0199999	A
UP2089-T	5.5	-15769.4	4	1, 0.841, 0.401, 0.175	0, 1, 0.476, 0.209	1721	Mutually exclusive	1721	0	0	3511	1	231	260	0	0	362	0	0	na	na	na	na	na	na	67	20	3421	625	29.275	677.401	117.779	55	2.14144	A
UP2092-T	3.9	-272.93	3	1, 0.489, 0.211	0, 1, 0.432	6389	Co-occurrence	6389	0	0	27	1	18	73	0	0	na	na	na	na	na	na	na	na	na	0	0	22	78	3.97251	0.0274933	0.666667	70	0.00952381	A
UP2100-T	4.1	-379.513	3	1, 0.433, 0.182	0, 1, 0.419	4608	Co-occurrence	4608	0	0	59	1	11	73	0	0	na	na	na	na	na	na	na	na	na	0	0	49	83	1.29817	1.80055	0.516453	70	0.0073779	A
UP2101-T	8.6	-27459.2	3	1, 0.579, 0.122	0, 1, 0.210	753	Co-occurrence	753	0	0	3972	2	53	637	1628	1628	na	na	na	na	na	na	na	na	na	1475	151	1504	1465	138.068	343.926	80.3324	57	1.40934	A
UP2109-T	3.5	-796.759	4	1, 0.847, 0.551, 0.142	0, 1, 0.651, 0.168	4797	Mutually exclusive	4797	0	0	4	0	0	13	0	0	316	1	18	na	na	na	na	na	na	0	0	0	333	12.1133	0.481619	2.09915	63	0.0333199	A
UP2115-T	4.4	-773.15	3	1, 0.508, 0.192	0, 1, 0.378	1614	Co-occurrence	1614	0	0	85	1	548	170	0	0	na	na	na	na	na	na	na	na	na	19	88	2	146	6.5037	5.16088	1.9441	56	0.034716	A
UP2117-T	4.2	-535.973	3	1, 0.499, 0.190	0, 1, 0.380	9042	Co-occurrence	9042	0	0	48	1	15	135	0	0	na	na	na	na	na	na	na	na	na	0	0	44	139	4.00884	1.50027	0.918184	68	0.0135027	A
UP2119-T	5.5	-9078.72	3	1, 0.448, 0.171	0, 1, 0.382	3128	Co-occurrence	3128	0	0	64	1	2275	2332	0	0	na	na	na	na	na	na	na	na	na	34	30	10	2308	161.835	15.2782	29.5189	54	0.546645	A
UP2123-T	3.1	-5552.28	2	1, 0.139	0, 1	3898	Co-occurrence	3898	0	0	2553	1	22	na	na	na	na	na	na	na	na	na	na	na	na	0	0	2553	0	0	230	38.3333	64	0.598958	A
UP2153-T	4.3	-19073.5	4	1, 0.950, 0.437, 0.206	0, 1, 0.460, 0.217	5893	Co-occurrence	5893	0	0	101	0	0	5817	1	1405	414	0	0	na	na	na	na	na	na	741	348	3087	2155	135.245	508.191	107.239	63	1.70221	A
UP2264-T	9	-1177.8	3	1, 0.418, 0.295	0, 1, 0.706	9172	Co-occurrence	9172	0	0	2	1	216	187	125	125	na	na	na	na	na	na	na	na	na	8	25	0	156	7.96346	5.99584	2.32655	68	0.034214	A
UP2267-T	7.1	-34084.3	3	1, 0.845, 0.118	0, 1, 0.140	6978	Co-occurrence	6978	0	0	4844	1	19	2047	1087	1087	na	na	na	na	na	na	na	na	na	4068	658	1958	206	2.02311	692.988	115.835	67	1.72888	A
UP2360-T	9.7	-29256.9	4	1, 0.339, 0.169, 0.168	0, 1, 0.500, 0.497	8124	Mutually exclusive	8124	0	0	327	1	730	3753	2869	2869	280	163	163	na	na	na	na	na	na	956	930	1519	950	71.6581	357.62	71.5463	61	1.17289	A
UP2370-T	5.1	-10590.6	3	1, 0.444, 0.225	0, 1, 0.507	957	Co-occurrence	957	0	0	2354	1	705	662	0	0	na	na	na	na	na	na	na	na	na	254	104	2109	548	78.3599	471.203	91.5938	62	1.47732	A
UP2372-T	6.5	-35829.9	3	1, 0.332, 0.171	0, 1, 0.515	2050	Co-occurrence	2050	0	0	4536	1451	2795	3475	0	0	na	na	na	na	na	na	na	na	na	312	1026	826	5846	915.469	427.543	223.835	69	3.24399	A
KAL053-T	23.3	-33936.9	2	1, 0.225	0, 1	5183	Co-occurrence	5183	0	0	2101	6383	7049	na	na	na	na	na	na	na	na	na	na	na	na	11	222	502	1365	196.919	151.934	58.1422	45	1.29205	B
KAL070-T	12.4	-76317.9	5	1, 0.738, 0.438, 0.152, 0.151	0, 1, 0.594, 0.205, 0.205	2982	Mutually exclusive	2982	0	0	6600	1	295	108	0	0	1776	5249	5249	395	938	938	na	na	na	1031	584	2217	4315	289.864	307.572	99.5726	63	1.58052	B
SMU039-T	4	-565.64	3	1, 0.342, 0.190	0, 1, 0.556	3435	Co-occurrence	3435	0	0	36	1	22	167	0	0	na	na	na	na	na	na	na	na	na	0	0	20	183	20.4227	1.57726	3.66667	63	0.0582011	B
SMU041-T	11.9	-35738.8	4	1, 0.450, 0.240, 0.127	0, 1, 0.532, 0.281	997	Mutually exclusive	997	0	0	1919	1	6590	2243	0	0	158	0	0	na	na	na	na	na	na	323	575	1192	2140	272.014	302.583	95.7662	64	1.49635	B
SMU109-T	5.5	-24878.9	4	1, 0.629, 0.339, 0.151	0, 1, 0.538, 0.240	655	Mutually exclusive	655	0	0	1038	0	0	3711	1	3661	1762	0	0	na	na	na	na	na	na	1480	328	2459	2149	273.786	767.946	173.622	75	2.31496	B
SMU141-T	8.8	-3158.27	3	1, 0.496, 0.156	0, 1, 0.314	3673	Co-occurrence	3673	0	0	60	1	6223	460	0	0	na	na	na	na	na	na	na	na	na	18	28	33	433	16.7885	2.80224	3.26513	56	0.0583059	B
SMU142-T	5.2	-19355.7	5	1, 0.970, 0.478, 0.318, 0.130	0, 1, 0.492, 0.328, 0.133	2975	Mutually exclusive	2975	0	0	66	0	0	2305	1	5052	2654	0	0	369	0	0	na	na	na	28	0	0	5233	472.182	15.1309	81.2188	59	1.37659	B
SMU157-T	4.2	-501.598	3	1, 0.560, 0.214	0, 1, 0.383	7691	Co-occurrence	7691	0	0	44	1	36	130	0	0	na	na	na	na	na	na	na	na	na	0	0	35	139	9.32861	0.671386	1.66667	64	0.0260417	B
SMU159-T	4.3	-486.237	5	1, 0.989, 0.454, 0.376, 0.135	0, 1, 0.459, 0.380, 0.137	49	Mutually exclusive	49	0	0	4	0	0	3	1	8360	127	0	0	30	0	0	na	na	na	8	0	0	151	13.8728	0.936361	2.46819	54	0.0457073	B
SMU161-T	10.3	-51635.6	3	1, 0.472, 0.128	0, 1, 0.271	2976, 3006	Co-occurrence	2976	0	0	3893	1	107	3337	4850	4850	na	na	na	na	na	na	na	na	na	1516	902	2300	2278	209.351	581.985	131.889	66	1.99832	B
UP2050-T	4.6	-29185	3	1, 0.997, 0.392	0, 1, 0.393	58	Co-occurrence	58	0	0	362	0	0	8701	1	1655	na	na	na	na	na	na	na	na	na	1885	742	6435	0	0	912	152	65	2.33846	B
UP2063-T	113.9	-15549.9	4	1, 0.796, 0.469, 0.257	0, 1, 0.589, 0.324	4696	Co-occurrence	4696	0	0	7	0	0	3	1	1130	187	3365	3365	na	na	na	na	na	na	51	17	80	48	2.12438	18.3443	3.41145	74	0.0461006	B
UP2093-T	10.1	-46561.5	3	1, 0.489, 0.171	0, 1, 0.35	6124	Co-occurrence	6124	0	0	2083	1	22	4584	4767	4767	na	na	na	na	na	na	na	na	na	1280	1057	3289	914	95.6046	786.621	147.038	73	2.01421	B
UP2099-T	5.6	-30866.8	5	1, 0.817, 0.501, 0.270, 0.184	0, 1, 0.613, 0.331, 0.225	7564	Mutually exclusive	7564	0	0	5310	1	84	928	0	0	101	0	0	1639	0	0	na	na	na	136	0	5336	2506	77.6338	469.229	91.1439	76	1.19926	B
UP2103-T	5.7	-60312.8	4	1, 0.523, 0.373, 0.144	0, 1, 0.713, 0.275	8145	Co-occurrence	8145	0	0	8023	2	105	4981	378	378	2314	0	0	na	na	na	na	na	na	791	138	7550	6838	292.514	565.416	142.988	69	2.07229	B
UP2116-T	8.5	-37907.7	3	1, 0.430, 0.118	0, 1, 0.276	4536	Co-occurrence	4536	0	0	4657	1	84	1796	2984	2984	na	na	na	na	na	na	na	na	na	1266	317	2069	2556	242.748	403.977	107.787	99	1.08876	B
UP2142-T	4.7	-13375.9	5	1, 0.968, 0.544, 0.329, 0.166	0, 1, 0.562, 0.340, 0.172	141	Mutually exclusive	141	0	0	55	0	0	100	1	5422	1434	0	0	2514	0	0	na	na	na	74	28	22	3810	156.515	13.5448	28.3432	73	0.388264	B
UP2159-T	3.8	-1629.53	4	1, 0.518, 0.388, 0.115	0, 1, 0.748, 0.223	3446	Mutually exclusive	3446	0	0	9	1	18	107	0	0	496	0	0	na	na	na	na	na	na	0	0	1	611	32.9065	0.187562	5.51568	68	0.081113	B
UP2187-T	13.9	-44629	3	1, 0.557, 0.279	0, 1, 0.501	4607	Co-occurrence	4607	0	0	3007	1	846	1612	4412	4412	na	na	na	na	na	na	na	na	na	983	412	969	1756	249.132	371.239	103.395	65	1.5907	B
UP2213-T	3.1	-3707.23	3	1, 0.469, 0.165	0, 1, 0.352	3664	Co-occurrence	3664	0	0	30	1	48	1691	0	0	na	na	na	na	na	na	na	na	na	0	0	17	1704	89.7395	3.13159	15.4785	67	0.231023	B
UP2380-T	3.3	-8439.05	2	1, 0.211	0, 1	179	Co-occurrence	179	0	0	3675	1	4935	na	na	na	na	na	na	na	na	na	na	na	na	66	623	2774	0	0	365	60.8333	69	0.881643	B
UP2396-T	4.9	-27961.4	5	1, 0.493, 0.379, 0.224, 0.109	0, 0.503, 0.387, 0.228, 0.111	2439	Mutually exclusive	2439	0	0	147	1	5404	720	0	0	2689	0	0	4705	0	0	na	na	na	37	97	27	7799	181.879	19.1152	33.4991	72	0.465265	B
10764-T	10.7	-33006.3	3	1, 0.342, 0.166	0, 1, 0.486	3882	Co-occurrence	3882	0	0	2147	3624	3825	2297	0	0	na	na	na	na	na	na	na	na	na	0	8	29	4397	134.901	4.94913	23.3084	58	0.401869	C
11114-T	11.3	-25940.8	2	1, 0.182	0, 1	2484	Co-occurrence	2484	0	0	3323	3733	4135	na	na	na	na	na	na	na	na	na	na	na	na	3	150	473	2691	678.726	161.274	140	70	2	C
11129-T	6.3	-19483.5	3	1, 0.506, 0.207	0, 1, 0.408	4562	Co-occurrence	4562	0	0	3780	1	4446	708	0	0	na	na	na	na	na	na	na	na	na	2494	424	895	675	20.3704	412.17	72.0901	63	1.14429	C
11141-T	193.4	-16893	2	1, 0.443	0, 1	2080	Co-occurrence	2080	0	0	126	3670	3833	na	na	na	na	na	na	na	na	na	na	na	na	1	27	44	54	1.0228	3.95187	0.829111	55	0.0150748	C
12596-T	11	-33027.6	4	1, 0.561, 0.339, 0.136	0, 1, 0.605, 0.243	1002	Mutually exclusive	1002	0	0	97	1	235	3346	3360	3360	890	0	0	na	na	na	na	na	na	159	1660	523	1988	187.638	551.31	123.158	64	1.92434	C
14261-T	5.7	-22248.8	4	1, 0.602, 0.3, 0.146	0, 1, 0.499, 0.243	5585	Mutually exclusive	5585	0	0	4986	1	2340	479	0	0	118	0	0	na	na	na	na	na	na	1925	1754	1407	497	34.2611	639.064	112.221	69	1.62639	C
14365-T	5.1	-14147.3	3	1, 0.491, 0.227	0, 0.683, 0.317	5701	Mutually exclusive	5701	0	0	1958	1	5089	2083	0	0	na	na	na	na	na	na	na	na	na	382	1135	619	1895	154.175	356.542	85.1195	61	1.3954	C
14862-T	10.5	-31071.1	3	1, 0.612, 0.121	0, 1, 0.198	3310	Co-occurrence	3310	0	0	3234	1	36	1041	2862	2862	na	na	na	na	na	na	na	na	na	2000	459	1144	585	79.7916	862.936	157.121	64	2.45502	C
15126-T	3.1	-1291.42	3	1, 0.514, 0.154	0, 1, 0.299	6599	Co-occurrence	6599	0	0	10	0	0	583	1	20	na	na	na	na	na	na	na	na	na	0	0	8	585	56.1213	1.80941	9.65511	51	0.189316	C
16004-T	5.3	-14091.8	4	1, 0.688, 0.358, 0.147	0, 1, 0.521, 0.213	7244	Mutually exclusive	7244	0	0	3134	1	98	121	0	0	588	0	0	na	na	na	na	na	na	2	1	3125	715	39.5025	564.042	100.591	57	1.76475	C
16311-T	15	-27068.4	3	1, 0.341, 0.167	0, 1, 0.489	3001	Co-occurrence	3001	0	0	1834	3708	3994	777	0	0	na	na	na	na	na	na	na	na	na	0	36	14	2558	156.069	16.2027	28.7119	62	0.463095	C
N0056-T	3.5	-7818.8	3	1, 0.528, 0.194	0, 1, 0.368	3402	Co-occurrence	3402	0	0	52	1	59	3144	0	0	na	na	na	na	na	na	na	na	na	0	0	31	3165	120.21	3.16745	20.5629	70	0.293756	C
N0059-T	3.1	-1761.93	3	1, 0.558, 0.150	0, 1, 0.269	3507	Co-occurrence	3507	0	0	18	1	42	807	0	0	na	na	na	na	na	na	na	na	na	0	0	14	811	31.1699	1.25613	5.40434	79	0.0684094	C
N0078-T	14.2	-35425.6	3	1, 0.319, 0.159	0, 0.671, 0.329	5179	Mutually exclusive	5179	0	0	2644	4788	5045	953	0	0	na	na	na	na	na	na	na	na	na	0	17	52	3497	146.55	8.34292	25.8155	68	0.37964	C
N0087-T	4.2	-9605.73	4	1, 0.533, 0.265, 0.259	0, 1, 0.497, 0.487	4879	Mutually exclusive	4879	0	0	172	0	0	117	1	4358	2991	0	0	na	na	na	na	na	na	281	703	2228	0	0	631	105.167	63	1.66931	C
N0088-T	5.2	-22649	5	1, 0.940, 0.437, 0.276, 0.218	0, 1, 0.465, 0.294, 0.232	171	Mutually exclusive	171	0	0	122	0	0	1493	0	0	999	1	4303	3617	0	0	na	na	na	169	0	0	5901	630.964	70.6226	116.931	78	1.49912	C
SMU132-T	10.6	-27072.2	4	1, 0.701, 0.497, 0.282	0, 1, 0.709, 0.402	1825	Co-occurrence	1825	0	0	70	0	0	42	1	293	3588	3286	3286	na	na	na	na	na	na	269	503	2012	909	97.7171	500.141	99.643	73	1.36497	C
TSH003-T	3.2	-1123.81	3	1, 0.589, 0.172	0, 1, 0.292	4816	Co-occurrence	4816	0	0	21	1	29	481	0	0	na	na	na	na	na	na	na	na	na	0	1	16	485	17.6704	1.02632	3.11612	76	0.0410016	C
TSH005-T	14.5	-27849.7	4	1, 0.667, 0.448, 0.225	0, 1, 0.672, 0.337	5858	Co-occurrence	5858	0	0	104	0	0	28	1	112	2630	4258	4258	na	na	na	na	na	na	282	351	1721	394	28.378	321.017	58.2324	56	1.03986	C
TSH008-T	4.9	-21319	4	1, 0.320, 0.157, 0.082	0, 1, 0.490, 0.256	1478	Mutually exclusive	1478	0	0	1617	1	4793	3456	0	0	1145	0	0	na	na	na	na	na	na	4	167	349	5467	186.37	71.0466	42.9028	89	0.482054	C
TSH012-T	3.8	-315.682	3	1, 0.433, 0.244	0, 1, 0.564	778	Co-occurrence	778	0	0	14	1	27	105	0	0	na	na	na	na	na	na	na	na	na	0	0	10	109	1.83896	0.161043	0.333333	83	0.00401606	C
UP2133-T	5.4	-47195.8	4	1, 0.941, 0.396, 0.224	0, 1, 0.421, 0.239	1435	Mutually exclusive	1435	0	0	1360	0	0	7625	1	3370	3535	0	0	na	na	na	na	na	na	3096	1258	2730	5388	369.674	727.366	182.84	58	3.15241	C
KAL0004-T	5.9	-14659.7	4	1, 0.603, 0.364, 0.137	0, 1, 0.603, 0.228	2042	Co-occurrence	2042	0	0	893	0	0	2465	1	5411	208	0	0	na	na	na	na	na	na	1727	211	1340	287	11.8057	439.164	75.1616	70	1.07374	D
KAL0043-T	6.2	-39545.1	4	1, 0.925, 0.522, 0.201	0, 1, 0.564, 0.217	1099	Co-occurrence	1099	0	0	3390	0	0	3061	1	4337	2687	0	0	na	na	na	na	na	na	4563	1111	751	2713	147.408	835.534	163.824	80	2.0478	D
KAL0104-T	5.7	-22736.7	3	1, 0.459, 0.192	0, 1, 0.419	5942	Co-occurrence	5942	0	0	4404	1	5069	1363	0	0	na	na	na	na	na	na	na	na	na	1692	1163	1641	1271	113.083	921.878	172.494	72	2.39574	D
N0015-T	11.3	-46641.8	4	1, 0.765, 0.454, 0.152	0, 1, 0.592, 0.198	445	Co-occurrence	445	0	0	3409	1	82	389	0	0	2158	3987	3987	na	na	na	na	na	na	1818	628	2401	1002	52.0438	439.565	81.9348	69	1.18746	D
UP2039-T	5.4	-29280.3	4	1, 0.667, 0.340, 0.202	0, 1, 0.510, 0.302	3779	Co-occurrence	3779	0	0	4562	1	289	1449	0	0	1784	0	0	na	na	na	na	na	na	237	0	4355	3203	110.247	449.937	93.3639	71	1.31498	D
UP2197-T	4.6	-11063.4	2	1, 0.391	0, 1	2881	Co-occurrence	2881	0	0	3467	1	5424	na	na	na	na	na	na	na	na	na	na	na	na	982	867	1616	0	0	387	64.5	54	1.19444	D
UP2258-T	12.6	-72157.1	3	1, 0.572, 0.174	0, 1, 0.303	5083	Co-occurrence	5083	0	0	3976	1	172	4312	7294	7294	na	na	na	na	na	na	na	na	na	1055	1283	2059	3779	447.78	582.806	171.764	63	2.72642	D
UP2317-T	3.1	-2458.4	3	1, 0.549, 0.198	0, 1, 0.360	7855	Co-occurrence	7855	0	0	12	1	4356	1116	0	0	na	na	na	na	na	na	na	na	na	8	3	5	1112	69.9373	3.46801	12.2342	59	0.20736	D
UP2351-T	6	-23683.6	5	1, 0.997, 0.603, 0.339, 0.202	0, 1, 0.605, 0.340, 0.203	3012	Mutually exclusive	3012	0	0	498	0	0	2936	1	3917	492	0	0	1722	0	0	na	na	na	1182	372	1492	2602	202.891	514.356	119.541	66	1.81123	D
